# Supplementary material for: A Novel Prognostic Index Based on the Analysis of Glycolysis-Related Genes in Head and Neck Squamous Cell Carcinomas
Source: J Oncol. 2020 Sep 24;2020:7353874. doi: 10.1155/2020/7353874 (PMC7532401; doi:10.1155/2020/7353874)
Supplement: Supplementary Materials — Supplementary Table 1: clinical information for 528 samples.xlsx. Supplementary Table 2: expression of 298 glycolysis-related genes in 546 HNSCC samples.xlsx. Supplementary Table 3: the expression of glycolysis-related genes and survival of patients in the training cohort.xlsx. Supplementary Table 4: the expression of glycolysis-related genes and survival of patients in the text cohort.xlsx. Supplementary Table 5: univariate Cox regression analysis of the training dataset (24 mRNAs were identified, P0.05).xlsx. [file 7353874.f1.zip]

Archive with 5 entries (5 files):
- 7353874.f1/Supplementary Tables 1.Clinical information for 528 samples.xlsx
- 7353874.f1/Supplementary Tables 2. Expression of 298 glycolytic related genes in 546 HNSCC samples.xlsx
- 7353874.f1/Supplementary Tables 3. The expression of glycolysis-related genes and survival  of patients in the training cohort.xlsx
- 7353874.f1/Supplementary Tables 4. The expression of glycolysis-related genes and survival  of patients in the text cohort.xlsx
- 7353874.f1/Supplementary Tables 5. Univariate Cox regression analysis of the training dataset (24 mRNAs were identified, P0.05)..xlsx
