# Supplementary material for: A Novel Prognostic Index Based on the Analysis of Glycolysis-Related Genes in Head and Neck Squamous Cell Carcinomas
Source: J Oncol. 2020 Sep 24;2020:7353874. doi: 10.1155/2020/7353874 (PMC7532401; doi:10.1155/2020/7353874)
Supplement: Supplementary Materials — Supplementary Table 1: clinical information for 528 samples.xlsx. Supplementary Table 2: expression of 298 glycolysis-related genes in 546 HNSCC samples.xlsx. Supplementary Table 3: the expression of glycolysis-related genes and survival of patients in the training cohort.xlsx. Supplementary Table 4: the expression of glycolysis-related genes and survival of patients in the text cohort.xlsx. Supplementary Table 5: univariate Cox regression analysis of the training dataset (24 mRNAs were identified, P0.05).xlsx. [file 7353874.f1.zip › 7353874.f1/Supplementary Tables 1.Clinical information for 528 samples.xlsx]

## Sheet: Sheet1
Supplementary Table 1.Clinical information for 528 samples
Id	futime	fustat	age	gender	grade	stage	T	M	N	hpv_status_by_p16_testing
TCGA-CN-4737	625	0	19	MALE	G2	Stage IVA	T2	unknow	N2b	Negative
TCGA-CV-A465	215	1	24	MALE	G1	Stage III	T3	M0	N0
TCGA-BA-A6DB	216	0	24	FEMALE	G1	Stage I	T1	M0	N0	Negative
TCGA-CR-7393	993	0	26	MALE	G2	Stage III	T1	M0	N1	Negative
TCGA-CV-5979	1315	0	26	MALE	G2	Stage IVA	T2	unknow	N2b
TCGA-BA-6873	122	0	28	MALE	G2	Stage IVA	T4a	unknow	N2b
TCGA-CV-7416	763	1	29	FEMALE	GX	Stage IVA	T4a	unknow	unknow
TCGA-MT-A51X	242	0	30	MALE	G1	Stage IVA	T1	M0	N2b
TCGA-CV-7255	64	1	32	FEMALE	G2	Stage IVA	T4a	unknow	N0
TCGA-CV-7180	327	1	34	MALE	G2	Stage II	T2	unknow	NX
TCGA-H7-A6C4	414	0	35	FEMALE	G2	Stage IVA	T2	M0	N2b	Negative
TCGA-CR-5249	1152	0	35	FEMALE	GX	Stage II	T2	M0	N0
TCGA-CR-7391	913	0	36	FEMALE	G1	Stage I	T1	M0	N0	Negative
TCGA-CN-5365	351	1	38	MALE	G2	Stage IVB	T2	unknow	N3
TCGA-CR-6470	1521	0	38	MALE	G2	Stage II	T2	M0	N0
TCGA-CV-7440	675	1	38	MALE	GX	Stage II	T2	unknow	NX
TCGA-BA-4076	415	1	39	MALE	G2	unknow	TX	unknow	NX
TCGA-CV-7090	5252	0	39	MALE	G2	Stage II	T2	unknow	NX
TCGA-CN-A6V7	594	0	40	MALE	GX	Stage IVA	T2	MX	N2b	Positive
TCGA-BB-7866	1368	0	40	MALE	GX	unknow	TX	unknow	NX	Positive
TCGA-CN-A640	134	1	40	FEMALE	G2	Stage IVA	T2	MX	N2b	Positive
TCGA-CQ-7065	1628	0	40	MALE	G2	Stage II	T2	unknow	N0
TCGA-KU-A6H8	327	1	41	MALE	G3	Stage IVA	T2	M0	N2b
TCGA-BA-A6DA	351	0	41	FEMALE	G2	Stage IVA	T4a	M0	N2c	Positive
TCGA-P3-A5QA	2182	0	41	MALE	G3	Stage I	T1	MX	NX
TCGA-BA-5557	623	0	41	FEMALE	G2	Stage III	T1	unknow	N1
TCGA-CV-6945	366	1	41	MALE	G2	Stage IVA	T4a	unknow	N2
TCGA-HD-A4C1	11	0	41	FEMALE	G1	Stage IVA	T4a	MX	N2b	Negative
TCGA-CV-A468	464	1	42	MALE	G2	Stage IVA	T4a	M0	N2a
TCGA-CR-7385	997	0	42	MALE	G2	unknow	T1	M0	NX
TCGA-UF-A7JC	546	1	42	MALE	G1	Stage IVA	T3	M0	N2b
TCGA-BB-7863	1025	0	43	FEMALE	G2	Stage III	T3	unknow	N0
TCGA-DQ-5624	1778	0	43	FEMALE	G2	unknow	TX	unknow	NX
TCGA-IQ-A61O	421	1	43	MALE	GX	Stage IVA	T2	MX	N2b
TCGA-CV-7409	543	1	43	MALE	G3	Stage IVB	T4a	unknow	N3
TCGA-CR-7397	754	0	44	MALE	G2	Stage IVA	T3	M0	N2b
TCGA-D6-A6EO	759	0	44	MALE	G2	Stage IVA	T4a	M0	N0
TCGA-BA-A6DD	173	1	44	MALE	G2	Stage IVA	T4a	M0	N2c	Negative
TCGA-C9-A480	386	0	45	FEMALE	G1	Stage III	T3	M0	N0
TCGA-CR-7371	94	1	45	FEMALE	G2	Stage III	T3	M0	N1
TCGA-CR-7372	759	0	45	MALE	G1	Stage I	T1	M0	N0	Negative
TCGA-BA-4077	1134	1	45	FEMALE	G2	Stage IVA	T4a	M0	N0
TCGA-P3-A6T2	2298	0	45	MALE	G2	Stage IVA	T3	MX	N2b
TCGA-CN-A63Y	504	0	46	MALE	G2	Stage II	T2	MX	N0	Positive
TCGA-BA-A4II	918	0	46	MALE	G1	Stage II	T2	M0	N0
TCGA-CV-A45R	5480	0	46	MALE	G1	Stage III	T2	M0	N1
TCGA-CQ-5329	2143	0	46	FEMALE	G2	Stage II	T2	unknow	N0
TCGA-BA-5149	806	1	47	MALE	G2	Stage IVA	T3	unknow	N2c
TCGA-F7-7848	1131	0	47	MALE	G2	Stage IVA	T4a	M0	N1
TCGA-F7-A620	543	0	47	MALE	G1	Stage III	T3	M0	N1
TCGA-P3-A6T0	578	0	47	FEMALE	G2	Stage IVA	T4a	MX	N0
TCGA-CN-A641	367	0	47	MALE	G2	Stage IVA	T4a	MX	N2b	Positive
TCGA-CX-7219	1045	0	47	MALE	G2	Stage IVA	T4a	unknow	N2c
TCGA-CR-6481	311	0	47	MALE	G2	unknow	unknow	unknow	unknow	Positive
TCGA-CV-A45X	198	1	47	MALE	G2	Stage IVA	T2	M0	N2b
TCGA-BA-6872	384	1	47	MALE	G2	unknow	TX	unknow	NX
TCGA-BB-A5HU	782	0	47	MALE	G2	Stage IVA	T4	M0	N2b
TCGA-DQ-7594	1218	0	47	MALE	G4	unknow	TX	unknow	NX	Positive
TCGA-CN-6988	318	0	47	MALE	G3	Stage IVA	T4a	unknow	N2b	Negative
TCGA-CV-7428	1671	1	47	MALE	G2	Stage IVA	T4a	unknow	N2b
TCGA-CR-5247	358	0	48	MALE	G2	unknow	TX	unknow	NX
TCGA-CV-7568	927	1	48	FEMALE	GX	Stage IVA	T4a	unknow	NX
TCGA-CN-4742	397	1	48	FEMALE	G3	Stage IVA	T4a	M0	N2b	Negative
TCGA-F7-8489	658	0	48	MALE	G1	Stage II	T2	M0	N0
TCGA-CN-A63W	377	1	48	FEMALE	G2	Stage IVA	T4a	MX	N2c	Negative
TCGA-BB-4223	3221	0	48	MALE	G3	Stage IVA	T2	M0	N2b
TCGA-CV-A464	1722	0	48	MALE	G2	Stage III	T3	M0	N0
TCGA-CN-5363	253	1	48	MALE	G3	Stage IVB	T4a	M0	N3
TCGA-DQ-7596	1265	0	48	MALE	G4	unknow	unknow	unknow	unknow
TCGA-CV-6959	256	1	48	MALE	G2	Stage III	T3	unknow	N0
TCGA-P3-A5QE	1559	0	49	MALE	G2	Stage III	T2	MX	N1
TCGA-CN-6022	281	1	49	MALE	G3	Stage IVA	T4a	M0	N1	Negative
TCGA-CV-7103	1591	1	49	MALE	G2	Stage IVA	T2	unknow	N2b
TCGA-P3-A5Q6	480	1	49	MALE	G3	Stage IVA	T4a	MX	N2b
TCGA-IQ-7630	485	0	49	MALE	G3	Stage II	T2	M0	N0
TCGA-CV-6960	862	1	49	MALE	G3	Stage III	T3	unknow	N0
TCGA-P3-A6T3	577	1	49	MALE	G2	Stage IVA	T3	MX	N2
TCGA-BA-A6DG	69	1	49	MALE	G2	unknow	TX	MX	NX	Negative
TCGA-BA-4075	283	1	49	MALE	G2	Stage III	T3	M0	N0
TCGA-CR-7382	796	0	49	MALE	G2	Stage IVA	T2	M0	N2c
TCGA-CV-7406	1748	1	49	MALE	GX	Stage II	T2	unknow	N0
TCGA-T2-A6X0	216	0	49	MALE	G2	unknow	TX	unknow	unknow
TCGA-P3-A5QF	330	1	49	MALE	G2	Stage IVA	T4	MX	N2b
TCGA-CV-7433	601	1	49	MALE	G3	Stage IVA	T4a	unknow	N2b
TCGA-P3-A6SW	1120	0	50	MALE	G3	Stage IVB	T3	MX	N3
TCGA-CN-A63U	964	0	50	MALE	G3	Stage IVA	T3	MX	N2b	Negative
TCGA-CV-5976	1478	0	50	MALE	G2	Stage IVA	T4a	unknow	N2b
TCGA-D6-6823	701	0	50	MALE	G2	Stage II	T2	unknow	N0
TCGA-UF-A71B	1506	0	50	MALE	G2	Stage IVA	T4	M0	N0
TCGA-CQ-6219	479	1	50	FEMALE	G2	Stage IVA	T3	unknow	N2a
TCGA-CV-7243	954	0	50	MALE	G2	Stage III	T2	unknow	N1
TCGA-D6-A6ES	389	0	50	MALE	G2	Stage IVA	T4a	M0	N0
TCGA-BA-A8YP	499	0	50	MALE	G2	Stage IVB	T4a	M0	N3	Negative
TCGA-CV-6003	1665	0	50	FEMALE	G2	Stage III	T2	unknow	N1
TCGA-CR-6487	234	0	50	MALE	G3	Stage I	T1	M0	N0	Positive
TCGA-BB-4228	559	0	50	MALE	GX	Stage III	T3	unknow	NX	Positive
TCGA-H7-8502	458	0	50	MALE	G2	Stage IVA	T4a	M0	N2b
TCGA-MZ-A7D7	547	0	51	MALE	unknow	Stage IVA	T3	MX	N2b	Negative
TCGA-HD-8634	385	1	51	FEMALE	G2	Stage I	T1	MX	N0
TCGA-CR-5243	2562	0	51	MALE	G3	unknow	TX	unknow	NX
TCGA-CR-6474	564	1	51	MALE	G2	Stage IVA	T2	M0	N2b
TCGA-CN-5366	360	1	51	MALE	G2	Stage IVA	T4a	M0	N2c
TCGA-BA-5153	1762	1	51	MALE	G2	unknow	T2	unknow	NX
TCGA-F7-A61W	14	0	51	MALE	G2	Stage IVA	T2	M0	N2b
TCGA-CQ-7072	2359	0	51	MALE	G3	Stage II	T2	M0	N0
TCGA-DQ-7590	1413	0	51	MALE	G4	unknow	TX	unknow	NX	Positive
TCGA-TN-A7HJ	403	0	51	MALE	G2	Stage IVA	T4a	M0	N2b
TCGA-CV-6941	342	1	51	MALE	G2	Stage III	T3	unknow	N0
TCGA-QK-A6II	284	1	52	MALE	G2	Stage IVA	T4a	M0	N2c
TCGA-CV-5440	3270	0	52	MALE	G3	Stage IVA	T4a	unknow	N2b
TCGA-CR-7367	1440	0	52	MALE	G1	Stage IVA	T4a	M0	N1
TCGA-D6-8569	770	0	52	MALE	G2	Stage II	T2	M0	N0
TCGA-DQ-5625	1133	1	52	FEMALE	G2	unknow	TX	unknow	NX
TCGA-CQ-6218	1253	0	52	FEMALE	G2	Stage IVA	T3	unknow	N2b
TCGA-CQ-6224	1721	0	52	MALE	G3	Stage IVA	T2	unknow	N2b
TCGA-DQ-5631	548	1	52	MALE	G3	unknow	TX	unknow	NX
TCGA-BB-A6UM	393	0	52	MALE	GX	Stage III	T1	MX	N2	Positive
TCGA-MT-A51W	437	0	52	FEMALE	G2	Stage I	T1	M0	N0	Negative
TCGA-HD-7832	836	0	52	MALE	G2	Stage IVA	T4a	unknow	N0
TCGA-BB-4224	278	0	52	MALE	G2	Stage IVA	T2	unknow	N2b
TCGA-T3-A92M	417	0	52	MALE	G2	Stage IVA	T4a	MX	N2c
TCGA-CN-4735	1737	0	52	MALE	G3	Stage IVA	T3	unknow	N2b	Negative
TCGA-BA-6868	472	1	53	MALE	G2	unknow	TX	unknow	NX
TCGA-MZ-A5BI	217	1	53	MALE	unknow	unknow	unknow	unknow	unknow	Positive
TCGA-CX-7086	573	0	53	MALE	G2	Stage III	T3	unknow	N1
TCGA-CV-7183	3981	0	53	MALE	G1	Stage II	T2	unknow	N0
TCGA-T2-A6WZ	484	1	53	MALE	G2	unknow	T3	unknow	N2b
TCGA-MT-A67G	190	0	53	FEMALE	G2	Stage IVA	T1	MX	N2b
TCGA-CV-A6JN	906	0	53	MALE	G1	unknow	unknow	unknow	unknow
TCGA-DQ-7595	1190	0	53	MALE	G3	unknow	TX	unknow	NX	Positive
TCGA-CN-6010	1523	0	53	MALE	G2	Stage IVA	T4a	unknow	N2c	Negative
TCGA-CR-7398	156	0	53	FEMALE	G2	Stage II	T2	unknow	N0
TCGA-CR-7404	1472	0	53	MALE	G2	unknow	TX	unknow	NX	Positive
TCGA-CN-6998	357	1	53	MALE	G2	Stage IVA	T3	unknow	N2b	Negative
TCGA-CN-4738	436	1	53	MALE	G2	Stage IVA	T4a	M0	N0
TCGA-CR-5248	1663	0	53	MALE	G3	unknow	TX	unknow	NX
TCGA-CV-5978	215	1	53	FEMALE	G2	Stage IVB	T4a	unknow	N3
TCGA-P3-A6T6	395	1	53	MALE	G3	Stage IVA	T4a	MX	NX
TCGA-CV-7097	385	1	53	MALE	G3	Stage II	T2	unknow	NX
TCGA-KU-A66T	552	0	53	FEMALE	G2	Stage IVA	T4	MX	N0
TCGA-CR-6480	362	0	53	MALE	G2	unknow	unknow	unknow	unknow	Positive
TCGA-CV-6933	2741	1	53	MALE	G2	Stage III	T3	unknow	N1
TCGA-P3-A5Q5	910	0	54	MALE	G3	Stage IVA	T2	MX	N2
TCGA-UF-A719	1663	0	54	MALE	G1	Stage II	T2	M0	N0
TCGA-F7-A61V	759	0	54	MALE	G1	Stage II	T2	M0	N0	Negative
TCGA-IQ-A61J	1021	0	54	MALE	G1	Stage IVA	T2	M0	N2b
TCGA-BA-5555	520	0	54	MALE	G2	Stage IVA	T3	unknow	N2c
TCGA-CV-7091	3381	0	54	MALE	G3	Stage I	T1	unknow	N0
TCGA-UF-A71D	1461	0	54	FEMALE	G2	Stage IVA	T4a	M0	N0
TCGA-P3-A6T8	400	0	54	MALE	G3	Stage IVA	T4a	MX	N2
TCGA-P3-A6T4	62	1	54	MALE	G2	Stage IVA	T4a	MX	N1
TCGA-CR-7368	1245	0	54	MALE	G2	Stage IVA	T4a	M0	N1
TCGA-H7-8501	461	0	54	MALE	GX	Stage IVA	T4a	M0	N1
TCGA-KU-A6H7	586	0	55	FEMALE	G2	Stage IVA	T2	M0	N2a	Positive
TCGA-CV-7254	1459	1	55	MALE	G3	Stage II	T2	unknow	NX
TCGA-CV-7247	577	1	55	MALE	G2	Stage III	T3	unknow	N0
TCGA-CN-5364	493	1	55	MALE	G2	Stage IVA	T4a	M0	N2c
TCGA-IQ-A6SH	471	0	55	MALE	G1	Stage III	T2	M0	N1
TCGA-CN-6017	853	1	55	MALE	G2	Stage IVA	T3	unknow	N2b	Negative
TCGA-P3-A6T7	487	1	55	MALE	G2	Stage IVA	T3	MX	N2b
TCGA-D6-6827	568	0	55	FEMALE	G3	Stage I	T1	unknow	N0
TCGA-IQ-A61E	1147	0	55	FEMALE	G2	Stage III	T3	MX	N0
TCGA-CN-5373	1584	0	55	FEMALE	G1	Stage I	T1	unknow	N0	Negative
TCGA-MT-A67D	56	0	55	MALE	G2	Stage II	T2	M0	N0
TCGA-CR-7389	392	0	55	MALE	G2	unknow	TX	unknow	NX
TCGA-CV-7429	107	1	55	MALE	G3	Stage IVA	T4a	unknow	N2b
TCGA-HD-A634	130	1	56	MALE	G3	Stage IVA	T3	MX	N2b	Positive
TCGA-TN-A7HI	412	0	56	MALE	G3	Stage IVA	T2	M0	N2b	Positive
TCGA-BA-5152	1288	0	56	MALE	G2	Stage IVA	T4a	M0	N0
TCGA-QK-A8Z9	449	1	56	MALE	G2	Stage IVA	T4a	M0	N2b
TCGA-CN-4727	1560	0	56	MALE	G2	Stage IVA	T4a	unknow	N0	Negative
TCGA-CR-6477	514	0	56	FEMALE	G2	unknow	unknow	unknow	unknow	Negative
TCGA-CN-4728	1724	0	56	MALE	G2	Stage IVA	T3	unknow	N2b	Negative
TCGA-CQ-A4C9	707	0	56	MALE	G2	Stage III	T2	M0	N1
TCGA-QK-A6V9	833	0	56	MALE	G2	Stage II	T2	M0	NX	Positive
TCGA-BB-7861	682	0	56	MALE	unknow	Stage III	T1	unknow	N1	Positive
TCGA-CX-A4AQ	1555	0	56	MALE	G3	Stage IVA	T2	M0	N2b
TCGA-CN-5356	1409	0	56	MALE	G2	Stage III	T3	unknow	N0
TCGA-CN-6013	727	1	56	MALE	G3	Stage IVA	T4a	unknow	N2b	Negative
TCGA-CV-7430	495	1	56	MALE	G2	Stage IVA	T4a	unknow	N0
TCGA-HD-A6I0	210	0	56	MALE	G1	Stage IVA	T4a	MX	N1
TCGA-CN-5374	1732	1	56	FEMALE	G3	Stage IVA	T2	M0	N2
TCGA-CV-6433	641	0	57	MALE	G3	Stage II	T2	unknow	N0
TCGA-CV-7435	4680	1	57	FEMALE	G2	Stage IVA	T3	unknow	N2b
TCGA-H7-A76A	637	0	57	MALE	G2	unknow	TX	MX	N2b	Positive
TCGA-BA-A4IH	622	0	57	MALE	G3	unknow	T2	M0	N1	Positive
TCGA-DQ-7592	1143	0	57	MALE	G2	unknow	TX	unknow	NX	Negative
TCGA-CV-6951	915	1	57	MALE	G2	Stage IVA	T4a	unknow	N2c
TCGA-CV-A45O	851	0	57	MALE	G2	unknow	unknow	unknow	unknow
TCGA-CN-A642	82	1	57	MALE	G3	Stage IVB	T4a	M0	N3	Negative
TCGA-CN-A6UY	713	0	57	MALE	G2	Stage IVA	T3	MX	N2b	Positive
TCGA-D6-A6EQ	368	0	57	MALE	G3	Stage IVA	T4a	M0	N1
TCGA-CV-5435	2319	1	57	MALE	G3	Stage IVA	T4a	unknow	N2b
TCGA-CV-7261	1512	0	57	MALE	G2	Stage IVA	T4a	unknow	N0
TCGA-CN-6011	933	0	57	MALE	G3	Stage IVA	T4a	unknow	N0
TCGA-IQ-A61G	360	0	57	MALE	G2	Stage IVA	T4a	MX	N2c
TCGA-CR-6471	1202	1	58	MALE	G2	Stage IVA	T4a	M0	N1
TCGA-BA-5556	725	0	58	FEMALE	G3	Stage II	T2	unknow	N0
TCGA-CN-6996	530	1	58	FEMALE	G2	Stage IVA	T3	unknow	N2b
TCGA-UP-A6WW	518	0	58	MALE	G2	unknow	unknow	unknow	unknow
TCGA-CV-7253	361	1	58	MALE	G2	Stage IVA	T4a	unknow	N0
TCGA-F7-8298	995	0	58	MALE	G1	Stage I	T1	M0	N0
TCGA-BB-7870	2016	0	58	MALE	G3	Stage IVA	T4a	unknow	N0
TCGA-WA-A7GZ	625	1	58	MALE	G2	unknow	T2	unknow	N0
TCGA-CR-7377	279	1	58	MALE	G3	Stage IVA	T4a	M0	N2c
TCGA-RS-A6TP	516	0	58	MALE	G3	Stage II	T2	M0	N0	Positive
TCGA-CV-A6K0	606	0	58	MALE	G3	Stage I	T1	M0	N0
TCGA-DQ-7593	1224	0	58	MALE	G4	unknow	TX	unknow	NX	Positive
TCGA-CV-5441	2886	0	58	MALE	G3	Stage IVA	T4a	unknow	N2b
TCGA-CQ-A4CH	379	1	58	MALE	G2	Stage II	T2	M0	N0
TCGA-HD-8314	670	0	58	MALE	G4	Stage III	T1	unknow	N1	Positive
TCGA-CR-7380	606	1	58	MALE	G2	Stage IVB	T4b	unknow	N0
TCGA-CN-6020	205	1	58	MALE	G2	Stage III	T2	unknow	N1	Negative
TCGA-D6-A4Z9	539	0	59	MALE	G2	Stage IVA	T2	M0	N2
TCGA-CN-A6V1	603	0	59	MALE	GX	Stage IVA	T2	MX	N2a	Positive
TCGA-CR-6472	1050	0	59	MALE	G3	unknow	unknow	unknow	unknow
TCGA-CQ-A4CB	893	0	59	MALE	G2	Stage III	T1	M0	N1
TCGA-BA-A6DL	623	0	59	MALE	G2	unknow	T0	M0	N0	Negative
TCGA-CV-A45U	1079	1	59	MALE	G1	Stage IVA	T4	M0	N2b
TCGA-UF-A7JS	680	1	59	MALE	G2	Stage IVA	T4a	M0	N2b
TCGA-CR-7369	1090	1	59	MALE	G2	Stage IVA	T4a	M0	N2b
TCGA-TN-A7HL	619	0	59	MALE	G2	Stage IVA	T3	M0	N2b	Positive
TCGA-CN-A6V6	635	0	59	MALE	GX	Stage IVA	T2	MX	N2b	Positive
TCGA-CQ-7063	2133	0	59	FEMALE	G1	Stage I	T1	M0	NX
TCGA-CQ-5324	1593	0	59	MALE	G2	Stage III	T3	unknow	N0
TCGA-CN-A63V	679	0	59	MALE	G2	Stage IVA	T4a	MX	N0	Negative
TCGA-CV-6954	2002	1	59	MALE	G2	Stage IVA	T4a	unknow	NX
TCGA-CN-5359	377	1	59	MALE	G2	Stage IVA	T4a	M0	N2b	Negative
TCGA-BA-A4IF	895	0	59	MALE	G2	unknow	TX	MX	NX	Negative
TCGA-CV-5970	406	1	59	MALE	G2	Stage IVA	T4a	unknow	N2b
TCGA-BA-A6D8	850	0	59	MALE	G2	Stage IVA	T4a	M0	N2c	Negative
TCGA-CR-6467	1777	0	59	MALE	G3	Stage III	T2	M0	N1
TCGA-QK-A8Z7	392	0	59	MALE	unknow	Stage IVA	T4a	M0	N2c
TCGA-UF-A7JK	424	1	59	MALE	G2	Stage IVA	T4a	M0	N2b
TCGA-D6-6517	292	0	59	MALE	G2	Stage III	T3	unknow	N0
TCGA-UF-A7JH	896	0	59	MALE	G1	Stage IVA	T4a	M0	N0
TCGA-CN-4725	1157	0	60	MALE	G2	Stage II	T2	unknow	N0	Negative
TCGA-CV-5971	701	0	60	MALE	G2	Stage IVA	T4a	unknow	N2a
TCGA-QK-A8Z8	171	1	60	FEMALE	G2	Stage IVC	T3	M1	N1
TCGA-CV-7422	1037	1	60	FEMALE	G3	Stage IVA	T4a	unknow	N1
TCGA-CN-A63T	225	0	60	MALE	G3	Stage IVA	T3	MX	N2b	Negative
TCGA-CV-7242	1095	0	60	FEMALE	G2	Stage II	T2	unknow	N0
TCGA-QK-AA3K	253	0	60	MALE	G2	Stage IVA	T3	MX	N2b	Positive
TCGA-IQ-7631	1172	0	60	FEMALE	G1	Stage II	T2	unknow	N0
TCGA-CV-6441	292	1	60	MALE	G3	Stage III	T3	unknow	N0
TCGA-CR-7399	181	0	60	FEMALE	G3	Stage IVA	T3	M0	N2c
TCGA-QK-A8ZA	371	1	60	MALE	G2	unknow	T2	MX	N2b	Positive
TCGA-CR-6491	693	0	60	MALE	G2	Stage IVA	T4a	M0	N2b	Negative
TCGA-CV-5434	3314	1	60	MALE	G2	Stage IVA	T4a	unknow	N2b
TCGA-QK-A652	645	0	60	MALE	G2	Stage III	T1	MX	N1
TCGA-CV-6939	666	1	60	MALE	G3	Stage IVA	T4a	unknow	N2b
TCGA-CN-A49A	526	1	60	MALE	G2	Stage IVB	T4b	MX	N0
TCGA-BA-6870	451	1	60	FEMALE	G2	unknow	TX	unknow	NX
TCGA-CN-A499	717	0	60	FEMALE	G2	Stage II	T2	MX	N0	Positive
TCGA-CN-5358	261	1	60	MALE	G2	Stage II	T2	unknow	N0	Negative
TCGA-CV-7415	695	1	60	MALE	G2	Stage IVA	T4a	unknow	N2c
TCGA-MT-A67F	384	0	60	FEMALE	G2	Stage IVA	T4	MX	N0
TCGA-CR-7365	1191	0	60	MALE	G2	Stage IVA	T4a	M0	N0
TCGA-CN-5367	352	1	60	FEMALE	G2	Stage IVA	T4a	M0	N2b
TCGA-HD-7229	1027	0	60	MALE	G3	Stage IVA	T4a	unknow	N0
TCGA-CN-4733	1586	0	61	MALE	G3	Stage III	T1	unknow	N1	Negative
TCGA-CV-A6JU	110	0	61	FEMALE	G2	Stage IVB	T4b	M0	N0
TCGA-CV-6961	76	1	61	MALE	G3	Stage II	T2	unknow	N0
TCGA-QK-A6IF	704	0	61	MALE	GX	unknow	unknow	unknow	unknow	Positive
TCGA-HD-8635	695	0	61	FEMALE	G2	Stage III	T1	MX	N1	Negative
TCGA-BB-7864	1527	0	61	MALE	G2	Stage IVA	T2	unknow	N2c
TCGA-CN-6019	1038	0	61	MALE	G2	Stage IVA	T4a	unknow	N0	Negative
TCGA-IQ-A6SG	579	0	61	FEMALE	G2	Stage III	T3	M0	N0
TCGA-CV-5430	4241	0	61	MALE	G3	Stage IVA	T4a	unknow	N2a
TCGA-CN-6992	1066	0	61	MALE	G2	Stage IVA	T3	unknow	N2b	Negative
TCGA-CN-A498	773	1	61	FEMALE	G1	Stage III	T3	MX	N0
TCGA-D6-6824	77	0	61	MALE	G2	Stage IVA	T4a	unknow	N0
TCGA-CQ-5327	1660	0	61	FEMALE	G2	Stage IVA	T3	unknow	N2c
TCGA-BA-7269	1273	0	61	MALE	G1	Stage III	T2	unknow	N1
TCGA-D6-A4ZB	376	0	61	MALE	G2	Stage III	T3	M0	N0
TCGA-CQ-6229	1179	0	61	MALE	G2	Stage II	T2	unknow	N0
TCGA-CN-A6V3	742	0	61	MALE	G3	Stage IVA	T3	M0	N2b
TCGA-CN-4722	1483	0	61	FEMALE	G1	Stage II	T2	unknow	N0
TCGA-BB-A6UO	268	1	61	FEMALE	G2	Stage IVA	T4a	MX	N2b
TCGA-CV-7410	6417	1	61	MALE	GX	Stage III	T2	unknow	N1
TCGA-CV-7104	393	1	61	FEMALE	G2	Stage IVA	T2	unknow	N2b
TCGA-CV-A45Y	2703	1	61	MALE	G3	Stage IVA	T4a	M0	N0
TCGA-CV-5439	546	1	62	MALE	G2	Stage IVA	T3	unknow	N2b
TCGA-QK-A6VC	600	0	62	FEMALE	G2	Stage IVA	T4a	M0	N1
TCGA-CN-4730	817	0	62	MALE	G2	Stage IVA	T4a	unknow	N1
TCGA-CR-6482	345	0	62	MALE	G3	unknow	unknow	unknow	unknow	Positive
TCGA-UF-A718	1971	0	62	MALE	G2	Stage IVA	T4a	M0	N0
TCGA-CV-5973	2641	0	62	FEMALE	G3	Stage III	T3	unknow	N1
TCGA-F7-A61S	576	0	62	MALE	G1	Stage III	T3	M0	N0
TCGA-UF-A7JV	90	1	62	FEMALE	G2	Stage IVA	T4a	M0	N2b
TCGA-D6-8568	759	0	62	MALE	G2	Stage II	T2	M0	N0
TCGA-HD-7753	866	0	62	MALE	G2	Stage I	T1	unknow	N0
TCGA-CV-7252	151	1	62	FEMALE	G2	Stage IVA	T4a	unknow	N0
TCGA-CV-7245	797	0	62	MALE	G2	Stage IVA	T4a	unknow	N0
TCGA-CV-7418	789	1	62	MALE	G2	Stage IVA	T4a	unknow	N2b
TCGA-BA-6869	644	0	62	MALE	G2	Stage III	T3	unknow	N0
TCGA-BA-A6DJ	407	1	62	MALE	G2	Stage IVA	T4a	M0	N2c	Negative
TCGA-CV-6436	1899	0	62	MALE	G1	Stage IVA	T4a	unknow	N0
TCGA-D6-A6EP	424	0	62	MALE	G3	Stage III	T3	M0	N0
TCGA-HD-7917	836	1	62	MALE	G1	Stage II	T2	unknow	N0
TCGA-DQ-7591	622	0	62	MALE	G4	unknow	TX	unknow	NX	Positive
TCGA-BA-A6DI	336	1	62	MALE	G2	unknow	TX	M0	NX	Negative
TCGA-CV-5966	545	1	63	FEMALE	G3	Stage IVA	T4a	unknow	N1
TCGA-UF-A71E	1504	1	63	MALE	G3	Stage IVA	T4a	M0	N0
TCGA-IQ-A61I	2	1	63	MALE	G3	Stage IVA	T1	M0	N2b
TCGA-CV-5443	2784	0	63	MALE	G3	Stage III	T3	unknow	N0
TCGA-HD-8224	446	1	63	MALE	G3	Stage IVA	T3	M0	N2c	Negative
TCGA-CV-7248	521	1	63	FEMALE	G2	Stage IVA	T4a	unknow	N2c
TCGA-CQ-6222	2016	0	63	MALE	G2	Stage IVA	T2	unknow	N2b
TCGA-CN-4731	998	1	63	FEMALE	G3	Stage IVA	T4a	unknow	N2c	Negative
TCGA-CN-A497	1065	0	63	MALE	G2	Stage III	T1	MX	N1	Negative
TCGA-BB-7872	1168	0	63	MALE	G3	Stage I	T1	unknow	N0	Positive
TCGA-CQ-A4C6	1353	0	63	MALE	G2	Stage II	T2	M0	N0
TCGA-CN-6021	276	1	63	FEMALE	G2	unknow	TX	unknow	NX
TCGA-CV-A45T	4856	1	64	FEMALE	G3	unknow	T1	M0	N0
TCGA-CR-7401	1077	0	64	MALE	G2	Stage I	T1	M0	N0
TCGA-BB-A5HY	321	1	64	MALE	G3	Stage IVA	T3	M0	N2b
TCGA-BB-7871	750	0	64	FEMALE	G2	Stage IVA	T4a	unknow	N2c
TCGA-CN-5355	1278	0	64	MALE	G2	Stage IVA	T4a	unknow	N0
TCGA-CN-6989	980	1	64	MALE	G2	Stage IVA	T3	unknow	N2c	Negative
TCGA-CV-7434	218	1	64	MALE	G2	Stage IVA	T4a	unknow	N1
TCGA-D6-6826	348	1	64	FEMALE	G2	Stage IVA	T4a	unknow	N2b
TCGA-CV-7178	2166	1	64	FEMALE	G3	Stage IVA	T4a	unknow	N2
TCGA-CV-6950	459	1	64	MALE	G2	Stage IVA	T3	unknow	N2c
TCGA-CV-5444	2437	0	64	MALE	G3	Stage IVA	T4a	unknow	N1
TCGA-DQ-5629	941	1	64	MALE	G2	unknow	TX	unknow	NX	Negative
TCGA-CV-7263	560	1	64	MALE	G1	Stage II	T2	unknow	NX
TCGA-CV-7411	2717	1	64	FEMALE	G1	Stage IVA	T4a	unknow	N0
TCGA-CN-6016	1443	0	64	MALE	G2	Stage IVA	T4a	unknow	N1	Negative
TCGA-CV-7250	2900	1	64	MALE	G1	Stage IVA	T4a	unknow	N0
TCGA-QK-A6IH	653	0	65	FEMALE	G2	Stage IVB	T4b	M0	N2b
TCGA-BA-5558	1995	0	65	MALE	G1	unknow	TX	unknow	NX
TCGA-CV-5436	584	1	65	MALE	G2	Stage IVA	T3	unknow	N2b
TCGA-BB-A5HZ	827	0	65	MALE	G2	Stage IVA	T4a	M0	N1
TCGA-CV-7423	3059	1	65	MALE	G1	Stage II	T2	unknow	NX
TCGA-CV-6962	126	1	65	MALE	G2	Stage IVA	T4a	unknow	NX
TCGA-CV-6952	185	1	65	FEMALE	G1	Stage IVA	T3	unknow	N2b
TCGA-CV-A6K1	685	0	65	MALE	G2	Stage IVA	T4a	M0	N0
TCGA-CV-A461	2064	1	65	MALE	G2	unknow	unknow	unknow	unknow
TCGA-CQ-6225	403	1	65	MALE	G2	Stage III	T3	unknow	N0
TCGA-H7-A6C5	642	0	65	MALE	G2	Stage II	T2	M0	N0
TCGA-D6-A6EM	232	0	65	FEMALE	G2	Stage III	T2	M0	N1
TCGA-HL-7533	1057	0	65	MALE	G3	unknow	unknow	unknow	unknow
TCGA-CV-A6JT	852	0	65	MALE	G2	Stage II	T2	M0	N0
TCGA-CQ-5325	654	1	65	MALE	G2	Stage I	T1	unknow	N0
TCGA-BB-4227	134	0	66	MALE	G2	Stage IVA	T4a	unknow	N2b
TCGA-QK-A6VB	641	0	66	MALE	G2	Stage IVA	T4a	M0	N0
TCGA-4P-AA8J	102	0	66	MALE	G2	Stage IVA	T2	MX	N2c	Negative
TCGA-CV-7100	274	1	66	MALE	G3	Stage III	T2	unknow	N1
TCGA-CR-7373	889	0	66	MALE	G2	Stage IVA	T4a	M0	N1	Negative
TCGA-CV-6934	65	1	66	FEMALE	G2	Stage IVA	T3	unknow	N2b
TCGA-CV-7446	1093	1	66	MALE	G2	Stage IVA	T2	unknow	N2b
TCGA-CN-6997	988	1	66	MALE	G3	Stage IVA	T3	unknow	N2c	Negative
TCGA-UF-A7JA	2265	0	66	FEMALE	G2	Stage IVA	T4a	M0	N1
TCGA-DQ-7588	427	1	66	MALE	G3	unknow	TX	unknow	NX	Negative
TCGA-CR-6478	183	1	66	FEMALE	G3	unknow	unknow	unknow	unknow
TCGA-CR-7364	1435	0	66	MALE	G2	Stage III	T3	M0	N0
TCGA-F7-A50G	616	0	66	MALE	G1	Stage III	T3	M0	N1
TCGA-CN-6012	1460	0	66	MALE	G2	Stage IVA	T3	unknow	N2c	Negative
TCGA-CN-6024	337	1	66	MALE	G2	Stage IVA	T4a	M0	N2c	Negative
TCGA-CV-5977	1840	0	66	MALE	G2	Stage IVA	T3	unknow	N2b
TCGA-CR-7390	1508	0	67	MALE	G2	Stage IVA	T4a	M0	N0	Negative
TCGA-BB-7862	1117	0	67	MALE	G3	Stage IVA	T3	unknow	N2c
TCGA-CV-7235	2347	0	67	MALE	G3	Stage II	T2	unknow	N0
TCGA-CQ-5326	89	1	67	MALE	G3	Stage IVA	T4a	unknow	N2c
TCGA-CN-4723	1699	0	67	MALE	G2	Stage IVA	T4a	unknow	N0
TCGA-CV-6935	295	1	67	MALE	G3	Stage IVA	T3	unknow	N2c
TCGA-CN-A49C	645	0	67	MALE	GX	unknow	TX	MX	NX	Positive
TCGA-UF-A71A	86	1	67	MALE	G1	Stage IVA	T4a	M0	N2c
TCGA-CV-7424	453	1	67	MALE	G2	Stage IVA	T3	unknow	N2b
TCGA-D6-A6EK	875	0	67	MALE	G1	Stage III	T2	M0	N1
TCGA-CR-7374	30	0	67	FEMALE	G2	unknow	TX	unknow	NX
TCGA-CV-7407	1081	1	67	FEMALE	G2	Stage II	T2	unknow	NX
TCGA-D6-A74Q	710	0	67	MALE	G3	Stage IVA	T4a	M0	N0
TCGA-CN-6994	1183	0	67	MALE	G2	Stage IVA	T4a	unknow	N0
TCGA-CR-6484	354	0	67	FEMALE	G2	Stage IVA	T4a	M0	N2	Negative
TCGA-CR-7392	1425	0	67	FEMALE	G1	Stage IVA	T3	M0	N2b	Negative
TCGA-P3-A6SX	1430	1	67	MALE	G2	Stage III	T2	MX	N1
TCGA-F7-A50J	947	0	67	FEMALE	G2	Stage III	T3	M0	N0
TCGA-CV-6956	217	1	67	MALE	G2	Stage III	T3	unknow	N1
TCGA-BB-4217	187	0	68	MALE	G3	Stage IVA	T4a	M0	N2c
TCGA-CR-7402	911	0	68	MALE	G2	unknow	TX	unknow	NX
TCGA-UF-A7JJ	549	0	68	MALE	G1	Stage IVA	T4a	M0	N0
TCGA-CR-6488	379	0	68	FEMALE	G2	Stage II	T2	unknow	N0
TCGA-MZ-A6I9	489	1	68	MALE	G2	unknow	unknow	unknow	unknow	Positive
TCGA-QK-A8ZB	542	0	68	MALE	G2	Stage IVA	T4a	M0	N0
TCGA-CN-5360	2169	0	68	MALE	G2	Stage IVA	T4a	M0	N0
TCGA-CR-6473	1125	0	68	MALE	G3	unknow	unknow	unknow	unknow
TCGA-CV-5432	3930	0	68	MALE	G3	Stage III	T3	unknow	N0
TCGA-CV-6936	166	1	68	MALE	G2	Stage IVA	T4a	unknow	N2c
TCGA-CV-A6JZ	714	0	68	MALE	G2	Stage II	T2	M0	N0
TCGA-IQ-7632	441	0	68	FEMALE	G1	Stage IVA	T4a	M0	N0
TCGA-CN-4726	142	1	68	MALE	G2	Stage IVA	T3	unknow	N2b	Negative
TCGA-KU-A66S	406	1	69	FEMALE	G2	Stage III	T1	MX	N1
TCGA-WA-A7H4	443	0	69	MALE	G3	Stage II	T2	unknow	N0
TCGA-CQ-6223	1428	0	69	MALE	G2	Stage II	T2	unknow	N0
TCGA-D6-6516	773	0	69	MALE	G2	Stage I	T1	unknow	N0
TCGA-CR-7386	1430	0	69	MALE	G1	Stage IVA	T4a	M0	N2c
TCGA-QK-AA3J	466	0	69	MALE	G3	Stage I	T1	M0	N0
TCGA-CV-7238	2727	0	69	FEMALE	G2	Stage II	T2	unknow	N0
TCGA-CQ-A4CD	1022	0	69	MALE	G3	Stage IVA	T4a	M0	N0
TCGA-QK-A6IG	222	1	69	MALE	G2	Stage III	T2	M0	N1
TCGA-CV-A6JO	197	1	69	MALE	G2	Stage IVA	T3	M0	N2c
TCGA-CR-6493	282	1	69	MALE	G2	Stage IVA	T3	unknow	N2b
TCGA-HD-7754	783	0	69	MALE	G1	Stage IVA	T2	unknow	N2b
TCGA-CV-A45Q	5152	1	69	FEMALE	G1	unknow	unknow	unknow	unknow
TCGA-CQ-5330	1897	0	69	FEMALE	G3	Stage IVA	T3	unknow	N2b
TCGA-CV-A6JY	646	0	69	MALE	G1	Stage IVA	T4a	M0	N0
TCGA-CQ-6220	985	1	69	MALE	G2	Stage III	T3	unknow	N0
TCGA-BB-8596	2161	0	69	FEMALE	G3	Stage IVA	T4a	MX	NX
TCGA-BA-4074	462	1	69	MALE	G3	Stage IVA	T2	M0	N2c
TCGA-BA-A6DE	440	0	70	FEMALE	G2	Stage II	T2	M0	N0	Negative
TCGA-CR-7388	823	1	70	FEMALE	G2	unknow	TX	unknow	NX
TCGA-IQ-A61K	161	1	70	FEMALE	G2	Stage IVA	T3	M0	N2b
TCGA-DQ-7589	1409	0	70	MALE	G4	unknow	TX	unknow	NX	Negative
TCGA-F7-A623	616	0	70	MALE	G1	Stage IVA	T1	M0	N2b
TCGA-CN-4734	1690	0	70	MALE	G2	Stage II	T2	unknow	N0	Negative
TCGA-CN-4736	395	1	70	FEMALE	G2	unknow	T1	unknow	NX
TCGA-CR-7394	1346	0	70	MALE	G2	Stage IVA	T4a	M0	N0	Negative
TCGA-CN-A49B	904	0	71	MALE	G3	Stage III	T3	MX	N1	Negative
TCGA-CN-4739	1394	1	71	MALE	G2	Stage IVA	T4a	M0	N0
TCGA-D6-A6EN	687	0	71	MALE	G3	Stage III	T2	M0	N1
TCGA-CR-5250	799	0	71	MALE	G3	unknow	TX	unknow	NX	Positive
TCGA-CQ-6228	456	1	71	FEMALE	G2	Stage IVA	T1	unknow	N2b
TCGA-UF-A7JD	739	1	71	MALE	G3	Stage IVA	T4	M0	N2b
TCGA-QK-A6IJ	387	0	71	MALE	G3	Stage III	T2	M0	N1
TCGA-BA-5559	2083	1	71	MALE	G3	unknow	TX	unknow	NX
TCGA-CV-6937	624	1	71	MALE	G2	Stage II	T2	unknow	N0
TCGA-IQ-A61L	416	0	72	FEMALE	G1	Stage II	T2	M0	N0	Negative
TCGA-BA-5151	722	0	72	MALE	G1	Stage IVA	T4a	unknow	N0
TCGA-C9-A47Z	191	1	72	FEMALE	G1	Stage III	T2	M0	N1
TCGA-CR-7370	105	0	72	FEMALE	G2	unknow	TX	unknow	NX
TCGA-F7-A50I	92	0	72	MALE	G2	Stage IVA	T4a	M0	N0
TCGA-CV-A460	1838	1	72	MALE	G3	unknow	T1	M0	N2
TCGA-UF-A7JT	993	1	72	FEMALE	G3	Stage IVA	T4a	M0	N0
TCGA-CN-6023	1584	0	73	MALE	GX	Stage IVA	T3	M0	N2c	Negative
TCGA-CQ-A4CI	950	0	73	MALE	G3	Stage III	T2	M0	N1
TCGA-DQ-5630	1030	0	73	MALE	G2	unknow	TX	unknow	NX
TCGA-CV-6942	4282	0	73	FEMALE	G3	Stage II	T2	unknow	NX
TCGA-T2-A6WX	209	1	73	FEMALE	G1	unknow	unknow	unknow	unknow
TCGA-CN-4729	392	0	73	MALE	G2	Stage III	T2	unknow	N1
TCGA-F7-A624	378	0	73	MALE	G3	Stage II	T2	M0	NX
TCGA-D6-6825	491	0	73	MALE	G2	Stage I	T1	unknow	N0
TCGA-CV-5431	522	1	73	MALE	G3	Stage IVA	T3	unknow	N2c
TCGA-CQ-5331	1399	0	73	FEMALE	G2	unknow	T2	unknow	NX
TCGA-BB-4225	146	0	73	MALE	G3	unknow	TX	unknow	NX
TCGA-CV-7427	4760	1	73	FEMALE	G1	Stage II	T2	unknow	NX
TCGA-MT-A7BN	469	0	74	MALE	G3	Stage IVA	unknow	unknow	unknow
TCGA-HD-7831	667	0	74	MALE	G2	Stage IVA	T2	unknow	N2
TCGA-CV-6943	602	1	74	MALE	G2	Stage III	T3	unknow	NX
TCGA-CV-7413	294	1	74	FEMALE	G2	Stage II	T2	unknow	N0
TCGA-CQ-5333	341	1	74	MALE	G3	Stage II	T2	unknow	N0
TCGA-HD-A633	421	0	74	MALE	G2	Stage IVA	T4a	MX	N0
TCGA-CV-7089	1972	1	74	MALE	G2	Stage IVA	T4a	unknow	N2c
TCGA-CV-6955	334	1	74	FEMALE	G3	Stage II	T2	unknow	NX
TCGA-UF-A7J9	1358	0	75	MALE	G2	Stage IVA	T4a	M0	N0
TCGA-BA-6871	108	1	75	MALE	G2	unknow	TX	unknow	NX
TCGA-F7-A622	359	1	75	MALE	G1	Stage III	T3	M0	NX
TCGA-CQ-7067	509	0	75	FEMALE	G3	Stage I	T1	unknow	N0
TCGA-H7-7774	407	0	75	FEMALE	G2	Stage IVA	T4a	unknow	N0
TCGA-CN-4741	2239	0	75	MALE	G2	Stage IVA	T4a	M0	N0
TCGA-CV-A45W	1398	1	75	MALE	G2	Stage II	T2	M0	N0
TCGA-CV-A45Z	1466	1	75	MALE	G3	unknow	T1	M0	N0
TCGA-CQ-A4CE	897	0	76	FEMALE	G2	Stage II	T2	M0	N0
TCGA-CV-7421	2	1	76	MALE	G2	Stage IVA	T4a	unknow	N0
TCGA-CV-7102	56	1	76	FEMALE	G3	Stage IVA	T3	unknow	N2
TCGA-CQ-7071	1311	0	76	FEMALE	G2	Stage III	T2	M0	N1
TCGA-IQ-A61H	1138	0	76	MALE	G2	Stage II	T2	MX	N0
TCGA-CV-5442	2327	0	76	FEMALE	G3	Stage IVA	T4a	unknow	N2b
TCGA-CV-7425	1718	1	77	FEMALE	G1	Stage III	T3	unknow	NX
TCGA-CQ-7069	1274	0	77	FEMALE	G2	Stage II	T2	M0	N0
TCGA-CV-7236	144	1	77	FEMALE	G3	Stage IVA	T3	unknow	N2c
TCGA-CX-7085	321	0	77	FEMALE	G2	Stage I	T1	unknow	N0
TCGA-CQ-6227	129	1	77	MALE	G2	Stage IVA	T3	unknow	N2c
TCGA-BA-A4IG	855	0	77	MALE	G3	unknow	T1	MX	NX
TCGA-CV-7437	506	1	77	MALE	GX	Stage II	T2	unknow	NX
TCGA-CR-7379	1036	0	78	FEMALE	G2	Stage IVA	T4a	M0	N2b	Negative
TCGA-CN-6995	112	1	78	MALE	G2	Stage IVA	T4a	unknow	N0
TCGA-CQ-A4CG	430	1	78	FEMALE	G2	Stage III	T3	M0	N0
TCGA-CV-A6JE	1075	0	78	MALE	G2	unknow	unknow	unknow	unknow
TCGA-CV-7414	14	1	78	MALE	G2	Stage IVA	T4a	unknow	N2b
TCGA-CR-6492	479	0	78	MALE	G3	Stage III	T2	M0	N1	Negative
TCGA-CN-5370	259	1	78	MALE	G3	Stage III	T3	M0	N1	Negative
TCGA-P3-A6T5	882	1	79	FEMALE	G2	Stage IVA	T4a	MX	N0
TCGA-CV-7432	2570	1	79	MALE	G1	Stage II	T2	unknow	N0
TCGA-CV-6948	1289	1	79	FEMALE	G2	Stage IVB	T4a	unknow	N3
TCGA-QK-A64Z	641	1	79	FEMALE	G1	Stage IVA	T4	MX	NX
TCGA-CR-7383	521	1	79	FEMALE	G2	Stage I	T1	M0	N0
TCGA-CV-A6K2	317	1	79	MALE	G1	Stage IVA	T4	M0	N0
TCGA-CN-4740	839	1	79	FEMALE	G2	Stage IVA	T4a	M0	N0
TCGA-HD-A6HZ	111	0	79	FEMALE	G2	Stage III	T2	MX	N1
TCGA-CQ-6221	1000	0	79	MALE	G3	unknow	T2	unknow	NX
TCGA-UF-A7JO	631	1	79	FEMALE	G2	Stage IVA	T4a	M0	N0
TCGA-T3-A92N	95	1	79	MALE	G3	Stage IVA	T2	MX	N2c
TCGA-UF-A7JF	1686	0	80	MALE	G2	Stage IVA	T4a	M0	N2a
TCGA-CQ-7068	1309	0	80	FEMALE	G2	Stage II	T2	unknow	N0
TCGA-CR-7395	930	0	80	FEMALE	G2	Stage II	T2	M0	N0	Negative
TCGA-CN-5361	2120	1	80	MALE	G2	Stage IVA	T4a	M0	N2a
TCGA-CV-6940	804	1	80	FEMALE	G2	Stage III	T2	unknow	N1
TCGA-BA-A6DF	238	1	80	FEMALE	G2	Stage IVA	T4a	M0	N0	Positive
TCGA-CV-6953	1641	1	80	FEMALE	G1	Stage III	T3	unknow	N0
TCGA-CV-7101	160	1	80	MALE	G2	Stage II	T2	unknow	NX
TCGA-CV-A45P	639	0	82	FEMALE	G2	Stage I	T1	M0	N0
TCGA-RS-A6TO	387	1	82	FEMALE	G2	Stage IVA	T4	M0	N2c	Negative
TCGA-CV-A463	23	1	82	FEMALE	G2	Stage IVA	T4a	M0	N0
TCGA-T2-A6X2	987	0	82	MALE	G1	Stage III	T3	MX	N0
TCGA-CX-7082	11	1	82	MALE	G2	Stage IVA	T2	unknow	N2b
TCGA-CV-7177	663	1	82	FEMALE	G2	Stage II	T2	unknow	NX
TCGA-D6-6515	403	1	82	FEMALE	G3	Stage II	T2	unknow	N0
TCGA-CQ-5323	1466	0	82	MALE	G2	Stage I	T1	unknow	N0
TCGA-CV-A6JD	182	1	82	FEMALE	G3	unknow	unknow	unknow	unknow
TCGA-CQ-7064	1973	0	83	FEMALE	G2	Stage III	T3	M0	N1
TCGA-CR-7376	972	0	83	MALE	G2	Stage III	T2	M0	N1	Negative
TCGA-BA-4078	276	1	83	MALE	G2	unknow	unknow	unknow	unknow
TCGA-BB-8601	624	0	84	MALE	G2	Stage III	T3	MX	N1
TCGA-MT-A67A	914	0	85	FEMALE	G2	Stage I	T1	MX	N0
TCGA-CV-7099	243	1	85	FEMALE	G2	Stage II	T2	unknow	NX
TCGA-CN-6018	580	1	85	FEMALE	G2	Stage IVA	T4a	unknow	N2b
TCGA-CV-A6JM	194	1	85	MALE	G2	unknow	unknow	unknow	unknow
TCGA-CQ-5334	129	1	87	MALE	G2	Stage IVA	T3	unknow	N2b
TCGA-CV-A45V	32	1	87	FEMALE	G1	Stage IVA	T4	M0	N0
TCGA-CV-6938	144	1	87	MALE	G1	Stage II	T2	unknow	NX
TCGA-CV-7438	194	1	87	FEMALE	G3	Stage I	T1	unknow	NX
TCGA-CV-7095	572	1	87	FEMALE	G2	Stage II	T2	unknow	NX
TCGA-CQ-5332	317	1	87	MALE	G2	Stage III	T3	unknow	N0
TCGA-CQ-A4C7	353	1	88	MALE	G3	Stage III	T3	M0	N1
TCGA-CN-5369	1	1	90	FEMALE	G3	Stage IVA	T4a	M0	N0
TCGA-CQ-A4CA		0	unknow	MALE	G2	Stage II	T2	M0	N0
