# Supplementary material for: A Novel Prognostic Index Based on the Analysis of Glycolysis-Related Genes in Head and Neck Squamous Cell Carcinomas
Source: J Oncol. 2020 Sep 24;2020:7353874. doi: 10.1155/2020/7353874 (PMC7532401; doi:10.1155/2020/7353874)
Supplement: Supplementary Materials — Supplementary Table 1: clinical information for 528 samples.xlsx. Supplementary Table 2: expression of 298 glycolysis-related genes in 546 HNSCC samples.xlsx. Supplementary Table 3: the expression of glycolysis-related genes and survival of patients in the training cohort.xlsx. Supplementary Table 4: the expression of glycolysis-related genes and survival of patients in the text cohort.xlsx. Supplementary Table 5: univariate Cox regression analysis of the training dataset (24 mRNAs were identified, P0.05).xlsx. [file 7353874.f1.zip › 7353874.f1/Supplementary Tables 2. Expression of 298 glycolytic related genes in 546 HNSCC samples.xlsx]

## Sheet: glyGeneExp
Supplementary Tables 2. Expression of 298 glycolytic related genes in 546 HNSCC samples
id	TCGA-CV-7250-11A-01R-2016-07	TCGA-WA-A7GZ-11A-11R-A34R-07	TCGA-CV-7438-11A-01R-2132-07	TCGA-HD-8635-11A-01R-2403-07	TCGA-CV-6959-11A-01R-1915-07	TCGA-CV-6943-11A-01R-1915-07	TCGA-CV-7177-11A-01R-2016-07	TCGA-CV-7101-11A-01R-2016-07	TCGA-CV-7423-11A-01R-2081-07	TCGA-CV-7238-11A-01R-2016-07	TCGA-CV-7434-11A-01R-2132-07	TCGA-CV-6960-11A-01R-2016-07	TCGA-H7-A6C5-11A-11R-A30B-07	TCGA-CV-7183-11A-01R-2016-07	TCGA-CV-7242-11A-01R-2016-07	TCGA-CV-7245-11A-01R-2016-07	TCGA-CV-6938-11A-01R-1915-07	TCGA-CV-7440-11A-01R-2187-07	TCGA-CV-6961-11A-01R-1915-07	TCGA-CV-7416-11A-01R-2081-07	TCGA-CV-7255-11A-01R-2016-07	TCGA-CV-7252-11A-01R-2016-07	TCGA-HD-A6HZ-11A-11R-A31N-07	TCGA-HD-A6I0-11A-11R-A31N-07	TCGA-CV-7097-11A-01R-2016-07	TCGA-H7-A6C4-11A-21R-A466-07	TCGA-CV-6934-11A-01R-1915-07	TCGA-CV-7424-11A-01R-2081-07	TCGA-CV-7091-11A-01R-2016-07	TCGA-CV-6956-11A-01R-2016-07	TCGA-CV-7261-11A-01R-2016-07	TCGA-CV-6939-11A-01R-1915-07	TCGA-CV-6936-11A-01R-1915-07	TCGA-CV-6935-11A-01R-1915-07	TCGA-CV-7178-11A-01R-2016-07	TCGA-CV-7425-11A-01R-2081-07	TCGA-CV-7432-11A-01R-2132-07	TCGA-CV-6955-11A-01R-2016-07	TCGA-CV-6962-11A-01R-1915-07	TCGA-CV-7235-11A-01R-2016-07	TCGA-CV-7437-11A-01R-2132-07	TCGA-CV-7406-11A-01R-2081-07	TCGA-CV-6933-11A-01R-1915-07	TCGA-CV-7103-11A-01R-2016-07	TCGA-F7-8489-01A-31R-2403-07	TCGA-CX-7082-01A-11R-2016-07	TCGA-CV-6436-01A-11R-1686-07	TCGA-CR-7391-01A-11R-2016-07	TCGA-CN-A497-01A-11R-A24H-07
SRD5A3	4.15243	2.8478	4.22992	6.59233	2.36362	4.31023	6.43336	16.4226	6.14752	1.92703	5.80983	7.44414	18.857	10.935	7.84921	2.14605	8.14138	31.2955	7.31826	3.01539	10.1736	3.0421	4.37937	6.7482	4.0859	1.58504	35.5744	9.39622	1.45424	9.15777	4.79803	1.55312	8.85541	6.35946	12.4769	7.07602	5.00203	15.4521	9.19841	9.019	6.02976	2.80429	3.62193	3.93231	4.81009	14.4188	4.69319	9.16105	1.87346
DEPDC1	1.16011	1.09925	1.57287	1.85908	1.44376	0.960902	1.87906	1.87616	1.2349	0.223728	0.127087	2.23133	0.68652	3.02817	1.99172	0.596299	1.16365	1.10479	0.725706	1.20104	1.70593	1.54432	0.453364	0.309913	0.262288	0.367	0.537718	1.79689	0.0458403	0.921048	2.49269	0.0655549	0.875555	1.67072	0.479513	1.42339	0.0820843	2.10095	1.19979	0.371079	2.38844	0.16129	0.0321708	1.68409	2.07321	4.32194	1.07872	1.41375	3.19162
MIF	21.0399	16.96	36.2294	26.9843	13.5418	33.4273	12.0275	15.3574	36.8157	17.3458	23.2522	21.8942	26.8825	65.5879	28.8521	9.5116	27.6316	14.893	60.9372	33.4444	27.6035	13.2227	54.129	62.9218	25.0436	13.7852	25.1659	19.4177	7.82963	24.4617	27.008	8.90857	52.2318	35.9826	27.9354	38.3384	24.3059	21.095	33.9812	15.2172	29.0122	20.5657	11.7196	24.1808	35.5716	52.8901	117.577	20.4139	56.7223
SLC25A13	7.36922	3.49308	8.66881	9.47248	6.1471	6.87909	8.14623	8.16806	7.71704	4.60391	5.08086	8.95318	5.71211	6.18861	7.64667	2.98646	7.91868	8.49416	8.04114	7.11861	7.7654	7.20863	2.52515	3.25639	3.62649	2.32965	5.27118	8.18054	1.307	5.64252	8.30376	1.38914	6.89603	8.0349	5.68902	8.52265	4.50438	8.05941	6.21824	5.43455	9.73664	3.38304	2.72435	7.78323	7.11525	5.67298	3.20849	6.41017	9.66352
PFKFB3	14.7102	9.88376	7.00858	7.12568	6.10593	10.6072	10.4517	12.5603	7.07437	11.4459	39.6187	25.5628	9.41834	9.23061	10.6688	18.889	19.2506	12.6366	3.57585	15.0785	17.2896	14.2689	6.58085	22.6411	29.9445	22.1732	16.8977	15.4351	28.5323	33.9637	36.3548	10.41	14.9306	23.2466	10.007	6.34914	8.42727	8.27861	18.3645	19.4529	5.31062	31.7172	2.41338	6.03378	29.1483	24.2506	4.51507	13.9837	30.9457
PFKL	17.6466	14.3264	17.8282	19.9063	16.6586	19.5716	15.267	16.8205	18.3668	15.4735	17.6784	17.8229	12.8897	13.8455	19.8528	10.5882	20.3522	14.1294	17.6374	20.5574	22.2857	17.6766	16.9428	19.2661	11.128	8.96818	18.8393	18.4274	10.5389	13.641	21.8374	11.8306	20.3966	24.9763	22.7381	17.986	18.8231	15.7494	24.3516	17.6508	22.4819	10.7138	8.65448	20.8821	22.1941	17.1878	13.7588	17.8932	29.6154
PKP2	3.81683	1.20908	5.09602	2.66959	1.30635	2.31666	5.29593	12.1745	3.60869	7.82092	22.8484	9.4591	11.3171	2.60361	9.31313	1.56373	4.89477	8.59177	2.52136	10.6228	19.241	2.62419	0.30589	1.53029	7.64978	0.700754	10.1751	6.14929	0.88382	1.83155	3.61261	5.85108	2.25357	3.93308	14.6211	2.16723	28.7197	4.50009	3.56291	35.0312	6.62554	6.84233	14.4607	1.24591	3.68524	0.537855	2.32956	1.62719	14.6132
RAE1	4.92365	3.21593	6.52917	6.43934	5.50503	5.55207	4.17049	4.66594	6.02799	3.77298	4.70497	6.18662	4.90208	5.23335	6.07263	2.50726	5.30274	4.50314	6.02962	5.80086	4.77364	5.01466	4.39875	4.69616	3.52759	3.32653	4.46788	4.98024	1.79503	5.90074	5.04481	2.15358	3.50169	5.39802	5.65686	6.58267	4.30411	5.02633	4.42148	3.95606	7.11289	4.18065	2.10629	5.40951	5.27257	13.6514	2.83591	5.14511	6.01477
SLC16A3	12.1005	8.10897	2.53793	2.11215	1.06642	3.01799	8.84801	11.8327	1.49384	2.82048	9.21999	4.21962	12.569	3.27801	3.79362	9.96049	1.43184	10.3122	1.86595	2.16224	13.9201	2.2633	5.17122	12.7093	3.96855	3.04854	35.6045	6.30084	5.04976	2.31363	3.87137	8.58294	3.41572	5.17142	2.76609	1.38492	5.01616	2.7884	9.92424	9.0895	3.53775	4.60601	2.11912	2.10824	22.5184	10.8771	11.0453	4.8956	16.5235
DDIT4	50.6912	45.8369	10.4233	19.8147	19.4748	17.7701	44.6952	66.5332	11.2223	31.4867	57.2033	77.7889	189.221	25.9378	17.9047	12.7364	36.388	34.0365	10.6934	38.1962	27.178	8.97265	59.9551	151.436	18.7527	50.7123	235.285	31.1493	12.3178	169.356	69.836	13.9662	10.1179	65.2373	98.419	26.2202	16.9142	28.7106	28.5877	25.4953	22.8456	14.8522	9.61153	10.1256	84.8552	74.2823	100.266	17.1807	92.6471
NUP85	4.41239	3.805	6.6343	6.28398	4.64082	4.81226	4.79299	4.92643	6.47639	3.29206	3.9454	5.68476	5.44776	4.09075	6.1455	3.60716	5.40691	4.87038	4.34353	6.15022	5.93632	5.27361	6.48695	7.06138	3.8185	3.32407	4.83094	5.18854	2.72309	5.2397	5.24386	2.00447	4.39112	4.13167	5.19459	5.81857	3.83589	4.80356	4.16373	4.28306	6.8022	3.36686	1.41599	4.53364	8.78454	10.0725	4.68372	3.87159	7.64225
BPNT1	7.01126	5.63694	8.13875	8.04781	7.94377	7.32478	7.37092	8.05677	9.26246	5.56487	13.2025	6.22372	10.099	11.0331	8.23798	4.51514	9.36957	9.92959	7.10354	5.77363	10.0728	7.1372	6.19709	5.84549	9.03155	3.29458	11.7845	8.70376	3.33266	8.43205	8.70185	3.52702	7.47479	7.74019	8.74676	10.2472	13.6997	8.91162	8.35716	13.2646	8.47832	4.24746	7.22144	7.63198	8.63769	13.6435	2.74729	6.02221	9.30258
CAPN5	12.3148	5.99013	6.27014	7.42766	1.49601	13.3879	27.1645	32.7478	5.9884	3.398	6.31532	12.5076	11.4652	15.5504	25.0829	7.46559	1.97764	24.2392	2.3258	2.37276	9.63167	8.25028	6.26269	1.24795	2.39728	1.85074	35.2308	21.3675	1.42651	4.03491	18.2391	1.56923	9.92325	25.3552	1.79549	0.91029	1.70744	5.86248	20.7285	4.14788	18.2613	1.73678	1.04733	4.49614	1.26362	0.555377	0.877949	7.42106	0.98433
PAM	5.67229	9.49325	6.41932	4.31772	10.5982	3.3462	6.5195	6.96975	3.35172	20.0811	58.8708	4.31194	37.3768	2.50904	3.64068	27.8542	14.9369	13.1185	8.43011	2.8972	7.86156	6.02611	6.33213	8.04702	31.5784	12.7425	17.5486	6.9538	21.3322	4.63125	3.3581	24.4094	9.70043	4.37109	21.4841	5.73347	53.5115	14.4106	5.97462	51.2004	2.28221	12.0054	74.8097	7.92008	17.6575	12.9479	5.9945	13.7566	3.87203
TREX1	0	0	0	0	0	0	0	0	0	0	0	0	0	0	0	0	0	0	0	0	0	0	0	0	0	0	0	0	0	0	0	0	0	0	0	0	0	0	0	0	0	0	0	0	0	0	0	0	0
LDHC	0.245883	0.0493289	0	0	0	0	0.00682404	0	0.0149682	0.0144942	0.606662	0	0.0589252	0.016224	0.504235	0.019024	0.092257	0.00625193	0.00845099	0	0.0631532	0	0.015581	0.0119641	0.0863958	0.206851	0.154904	0.00719304	0.0107654	0.0292741	0.0123675	0.0291699	0	0.00649424	0.0549323	0.148842	1.10876	0.00725586	0.232342	0.121247	0.0112182	0.380024	0.615205	0.227397	0	0.00723267	0.0361902	0	0.0673739
PGK1	92.9344	63.2011	94.2342	83.2418	64.0595	97.2116	75.2255	57.2897	70.746	58.182	61.5111	79.9672	72.1007	178.461	88.4161	60.3459	77.7299	76.3083	105.153	78.853	73.4036	88.5412	43.0105	38.5761	69.0163	57.6204	63.4012	69.4529	68.4016	88.3679	81.675	61.1222	84.4988	91.2305	62.8314	93.0349	47.2914	95.6415	83.2763	59.9936	77.6659	60.9239	34.5799	76.1088	124.065	116.465	39.0027	83.3345	73.676
NUP43	4.38656	5.33509	6.12866	6.15802	5.59571	6.27681	5.00631	6.52664	4.52829	4.04232	4.39481	6.54781	4.26164	6.52636	4.06138	4.35542	7.48105	6.22973	2.85227	4.26758	6.29887	4.77174	5.5312	4.98241	5.84454	3.47113	4.7372	5.38582	3.51634	5.61355	6.28164	3.5023	3.53191	5.10818	5.43217	4.60842	5.96507	6.08795	3.78616	5.6346	7.03158	3.79703	2.30196	4.83012	6.63271	9.89422	3.36324	4.16269	12.118
SLC35A3	4.01384	3.39457	3.4297	4.40068	2.66882	4.47997	6.09331	8.12477	2.72332	5.15496	6.50932	5.2286	15.4483	8.09566	4.69483	2.60125	3.73037	8.06729	2.13048	2.86828	7.23168	4.87855	1.32849	0.831342	4.1279	1.33087	10.5376	7.26306	1.88999	3.1708	5.6835	3.06159	2.75548	3.39209	4.53989	2.36579	6.15593	6.31326	4.90126	6.45612	3.27999	1.99856	4.84765	3.30942	3.5405	3.51558	1.12252	3.27188	9.11437
PGM2L1	1.14213	1.88409	0.543978	0.396213	0.747035	0.194914	0.426298	0.980952	0.275541	1.72656	1.72398	0.302986	8.29053	0.11561	0.245844	1.85268	0.916389	2.96705	0.244897	0.149307	2.27823	0.472091	0.314579	0.684876	2.02706	1.29384	5.72707	1.2985	4.27288	0.628127	0.376018	2.39039	0.637265	0.330109	0.722858	0.289905	1.55934	1.45116	0.532998	2.82595	0.559577	1.42125	0.532216	0.353699	2.80064	0.69234	0.244132	2.00911	5.4971
NT5E	1.63724	2.95008	1.84714	1.8513	1.86209	1.48597	15.1511	0.949586	1.02383	4.94031	5.22248	1.74556	2.36021	0.832298	1.58835	15.3132	10.4153	2.24798	1.58183	1.35678	1.88988	2.34179	2.43394	2.23388	9.04619	1.29591	2.86677	2.66615	6.97051	2.21433	1.09744	5.2802	6.73297	1.53372	1.69083	3.22281	1.13546	4.16829	2.13913	4.50391	0.580686	2.16271	0.811081	1.76967	23.5431	3.02848	4.62303	6.54698	2.06029
PPP2CA	28.2962	18.5256	30.0519	32.9349	25.2787	34.777	26.8653	26.4458	28.9737	24.0466	23.387	31.4473	23.2388	34.5416	35.4869	17.0493	33.7076	36.8525	31.9131	37.6851	31.2243	34.5263	15.6839	24.1482	21.3686	23.7647	23.085	26.4174	15.5137	33.9021	27.9101	14.156	28.2893	27.6314	23.5614	30.505	17.2839	27.8323	22.5686	21.8772	32.8454	28.7866	9.51432	22.6483	28.0435	24.2557	30.6756	23.6963	31.7237
VLDLR	6.15937	7.36322	3.45039	5.00419	4.98949	5.59776	4.21283	2.53503	2.95653	4.60244	1.45437	6.0717	2.4939	5.71583	2.34563	5.15243	1.2869	3.20327	4.44564	2.88371	0.975755	4.35457	2.6529	1.60228	3.39168	3.81016	2.14086	5.73796	6.96478	5.36306	7.96109	5.26762	4.49984	4.78863	1.17067	2.95163	2.02739	3.50279	8.25018	2.02293	3.4779	5.17017	0.935548	4.66344	10.1799	2.80691	0.732286	4.76138	1.37788
B4GALT1	26.1053	18.4421	23.9024	27.5373	15.4786	27.5804	72.2723	49.4006	19.451	43.2649	55.7676	31.8127	46.6447	28.2747	48.4658	25.7976	36.7979	51.7739	26.9058	21.354	40.6117	21.8912	14.9258	43.793	34.9368	10.2225	53.9687	51.1056	13.3176	25.8949	47.7492	17.49	28.1749	54.4384	43.3235	20.4903	55.5041	25.6969	51.3264	75.3134	45.796	16.5409	17.4368	17.8699	76.5647	41.3979	28.7958	31.3245	23.7359
PLOD1	7.15452	6.94658	10.5546	7.39221	5.95375	6.53344	12.4609	6.72911	9.97633	9.91725	27.1715	10.0032	13.2459	4.07615	7.3365	12.6957	19.6713	7.30227	6.59937	5.95443	10.8835	6.74092	8.76185	31.755	18.8484	4.91912	7.77361	7.13531	9.7039	14.2372	8.13339	14.1903	9.31433	8.50595	19.045	12.2063	40.1635	12.678	9.34458	34.7028	6.4101	4.63922	22.5639	9.09926	29.379	39.9347	22.2581	17.688	30.7369
OGT	6.26689	16.1019	4.21312	13.0724	5.45556	6.32819	5.38518	5.62114	5.03518	4.70397	4.94246	5.40239	7.4859	3.42941	4.52744	7.1733	7.24355	3.88182	2.20318	5.26965	4.66887	9.25042	5.10658	3.72702	6.41126	5.22136	5.65424	9.19338	5.68203	3.47316	5.69982	3.55214	3.19809	2.76768	4.1825	4.12821	5.86903	5.67327	3.98302	5.08211	5.0971	4.11589	2.81929	4.98367	11.7884	6.22807	1.42179	5.42809	13.6013
CHST2	0.961848	0.230054	1.00658	0.789535	0.766926	0.685582	0.346333	0.397693	2.95995	1.41157	2.76044	0.701692	2.0431	0.166905	0.561203	1.31923	17.751	1.9095	0.838487	1.3928	0.696613	0.441798	0.726649	17.9042	2.98461	0.472887	0.754448	0.499902	1.07303	1.07079	0.322319	0.666859	1.1091	0.466183	4.52597	6.56384	2.91772	8.71853	0.670941	3.43016	0.602687	1.04594	1.39459	2.02912	5.42856	7.57622	11.7087	5.64566	3.9687
ENO4	0.0301497	0.013065	0.0195664	0.0233343	0.0337693	0.0345764	0.0180738	0.0408136	0.0148665	0.0383886	0.106473	0.00659849	2.1264	0.0161137	0.0395375	0.0881754	0.0999601	0.0869323	0.0167871	0.0228686	0.0574971	0.0208064	0.0515838	0.055453	0.063562	0	2.2654	0.0476277	0.00712813	0	0.0286615	0.0128763	0.0276132	0.00860014	0.138216	0.0147831	0.116197	0.586133	0.0445332	0.110388	0.103992	0.0197355	0.0214395	0.0388562	0.031073	0.0574682	0	0.0314053	0.0817863
ALG1	2.39333	1.17227	3.32192	2.59455	1.95135	1.6581	2.34669	3.23282	3.04098	2.61037	5.12582	3.32946	5.01554	2.48342	2.97717	1.74337	3.52509	3.54538	2.77622	1.89259	3.24806	1.84492	1.78603	3.72961	3.70372	1.01206	3.70631	2.62441	1.18887	1.95519	2.27346	1.79871	2.87599	3.22887	4.91458	3.70361	5.15908	3.9524	2.40461	4.52685	3.49188	1.18748	4.00429	2.88827	4.91465	5.4294	2.00339	3.48829	5.40503
AGRN	6.80294	5.4429	16.6093	13.0209	6.54064	6.54168	25.1243	13.2653	13.8822	10.126	44.4294	16.4801	18.8018	2.02836	11.7045	7.16614	17.7047	21.5484	11.0709	15.2676	32.7214	8.58538	8.511	12.8982	21.3579	3.31207	21.3298	12.7652	4.25785	8.20347	9.08221	7.38467	11.3305	11.3657	18.7419	12.7333	36.1362	18.8791	18.2079	31.9227	11.6889	5.21375	7.86799	18.6074	83.3479	49.6786	25.8281	24.6877	51.4338
NUP188	10.1978	7.70357	13.3059	15.2783	10.7601	11.788	10.7867	13.4168	10.8298	9.33316	7.58305	18.8187	7.31539	3.81697	11.6818	7.12911	12.687	14.8081	10.5687	17.1546	15.769	15.1602	3.24758	5.59523	4.88457	5.65577	10.7389	12.3333	4.2661	10.5889	13.949	4.03809	11.97	11.4414	8.70458	8.89017	8.13013	11.4107	11.0905	10.5667	14.2326	6.75995	2.64049	13.4125	12.9297	27.0317	11.4015	11.0043	16.7841
CASP6	3.40727	2.65939	5.48826	3.21714	2.67009	3.06458	3.28162	3.95075	4.4302	1.8363	9.0316	3.16979	8.2913	5.22171	3.49816	2.07857	6.71903	6.78147	2.31448	1.83963	5.63475	2.87144	2.65438	3.39271	5.39261	2.03208	3.994	6.01846	1.04468	3.26164	3.4071	2.13873	3.68717	3.10201	6.31388	3.86772	8.84156	5.14785	4.5291	9.20842	3.9251	1.49439	2.64635	3.28233	7.21044	7.06542	5.58785	3.5969	4.95193
SEH1L	4.35601	2.45714	4.77114	5.71749	3.7481	5.39491	3.04314	3.66886	4.87385	4.07054	2.78905	6.28659	2.90727	3.96936	5.50628	2.62634	4.1693	4.80124	5.28391	5.90669	4.86317	6.0659	1.53541	3.60152	3.04899	2.97006	2.58339	3.67785	2.75866	4.92499	3.66734	1.91051	3.30239	2.99213	3.65859	3.59992	2.28323	3.33723	2.49197	3.38388	4.07662	3.61337	1.35527	3.74477	2.88679	5.219	2.97023	3.41145	42.9554
FBP1	1.5327	0.681525	2.00422	0.604919	0.76156	0.50596	11.6479	14.116	1.2784	4.18707	23.7861	1.08894	13.7041	2.1498	3.71657	1.72834	20.0779	10.4123	0.233517	0.74612	6.46459	0.40454	1.46772	2.6297	8.69307	0.375273	10.9883	16.28	1.05466	0.355426	1.49122	7.49843	1.78961	1.55794	50.2005	2.60789	38.6222	6.21529	5.62138	38.6043	3.6916	0.786155	32.7053	0.690991	2.94709	3.74269	1.06364	8.24083	26.021
HMMR	1.91951	1.36532	2.29246	2.33844	2.21088	1.44135	3.40338	2.82153	1.82844	0.293161	0.190631	2.51422	1.1866	4.22707	2.72625	0.79319	2.16063	1.89013	0.503796	1.03314	2.53368	1.86071	0.232211	0.312036	0.756207	0.53215	0.806577	2.11722	0.212011	1.32963	3.22887	0.263945	1.23564	2.25029	0.760204	2.5312	0.263236	3.66895	1.91685	1.0124	3.78567	0.249868	0.0310219	2.00685	4.12143	2.08269	2.07268	1.7714	5.12212
NUP153	12.9216	7.35576	11.6065	14.7129	8.32798	13.6095	11.6125	13.1966	10.185	9.77935	8.59595	12.4227	8.40731	5.70151	14.1532	8.06579	11.8158	13.7733	9.39853	12.0426	14.7007	13.7176	1.90007	2.85979	6.15004	5.25422	9.65217	11.6332	6.49673	10.6996	12.9206	5.24966	9.355	10.8279	7.47372	6.85187	7.77918	12.4558	8.59269	9.18318	11.3282	8.92896	3.68309	10.1304	7.32878	16.1299	2.43172	10.9199	12.7299
GUSB	6.24647	6.54961	6.79641	5.88122	6.73885	6.3814	12.0438	13.3562	5.77758	7.92222	19.0987	8.88554	13.8745	7.34362	11.3683	9.44799	11.8224	13.4029	4.4129	5.88711	11.7533	5.36777	14.5712	15.2385	14.4082	4.31809	13.9083	10.0526	5.95473	6.62148	8.74266	10.2872	7.97007	9.76782	15.8614	6.0459	20.6839	12.3527	10.2905	23.2807	10.8562	4.70826	13.2746	6.83305	11.0703	9.38298	6.21057	8.29713	15.8344
GALK2	1.55295	1.22953	1.41392	1.76462	1.40299	1.38418	1.43704	1.36033	1.57812	1.20961	1.6246	1.34176	2.67463	1.27725	1.24766	1.52238	1.81984	1.74614	1.1355	1.31819	2.00058	1.3571	0.4161	0.778801	1.51948	0.997405	2.88527	1.64081	1.19191	1.84859	1.65141	1.15498	1.32833	1.36578	1.80013	1.45333	1.84842	1.36044	1.21103	1.80871	1.51355	1.12142	1.13493	1.43453	1.46539	3.43651	0.48324	1.43158	1.68993
P2RX7	0.746499	0.682003	0.736736	1.84596	1.17733	0.814398	0.399556	0.206971	0.449512	0.621433	0.659889	0.150578	0.200331	0.275787	0.130325	0.68749	2.41733	0.278677	0.549086	0.433146	0.602367	1.18998	0.441429	0.180777	1.09149	0.277824	0.173	0.94014	0.26433	0.534485	0.317684	0.506871	1.23926	0.365526	1.26994	2.02692	1.61508	2.50244	0.524293	2.77382	0.417412	0.18859	1.17665	1.97568	0.881927	1.22946	0.259746	1.97682	0.572635
POLR3K	4.42376	3.87335	7.41489	4.62494	4.58783	3.90507	3.85979	5.1043	6.83942	3.57665	4.66921	5.80241	8.43029	5.81182	7.62309	3.38281	4.52059	4.64559	4.99559	4.33602	5.25302	3.68538	5.40869	6.51498	6.64334	4.42249	9.38905	4.27591	3.92804	5.73576	4.39605	3.72036	3.33007	3.99016	5.86077	5.55474	4.63562	5.66518	3.49223	5.42918	5.95954	3.82625	3.21038	3.60395	3.72129	8.45457	7.12829	3.57698	17.2357
DSC2	40.3351	51.9568	98.9062	110.887	152.471	148.284	66.3554	30.1173	58.8372	83.8698	10.4792	61.897	1.6332	67.0965	30.9711	14.4363	16.9984	37.4649	143.486	99.5137	29.721	162.697	28.5049	14.1036	5.08343	46.7706	4.86101	75.4189	1.46576	66.1943	79.0567	2.62142	85.6142	81.4511	6.18254	119.898	11.9266	143.113	59.754	11.7576	39.6	73.2197	6.69188	145.34	61.4379	33.0657	50.8439	144.952	7.78135
CHPF2	6.48359	4.11901	10.3242	9.52206	5.04799	6.08789	10.3593	11.5059	10.321	9.35513	20.9681	10.9725	14.0867	2.88565	8.26375	8.63768	15.5358	15.1442	11.1492	9.56376	15.0555	6.88843	6.13254	26.0244	12.454	4.92382	16.7404	8.18514	5.90519	9.13498	8.06875	7.01456	10.4094	8.39945	12.7536	8.74296	16.6159	12.7211	7.84098	18.8055	7.17083	5.60578	8.979	7.00223	23.5617	11.0157	9.58503	12.6935	21.589
KIF2A	5.06342	2.61066	5.16118	6.28907	4.66765	5.0873	4.05772	6.53095	2.65699	3.72729	5.456	6.18369	7.42999	2.83718	4.43135	3.19465	6.6286	8.82607	3.41191	4.4499	8.5428	4.77464	0.923062	2.70389	3.27741	1.55324	8.43214	4.99683	1.94638	3.45572	4.97684	1.93719	3.66626	3.89296	2.87828	3.21361	3.11542	8.07176	3.46395	6.37158	5.06327	3.02471	2.0177	3.69222	6.51795	3.58339	1.01959	5.26597	9.58925
PGP	5.47805	4.82802	3.89906	3.80835	4.3186	2.40704	2.68417	3.43053	4.72043	4.6656	6.03076	3.23844	3.31972	2.71714	3.53735	6.23089	4.75512	3.48218	3.04494	2.79661	3.63271	2.67357	6.52365	11.4432	6.37181	7.15987	3.69947	2.87352	8.25387	3.59085	3.02615	8.15709	3.1344	2.75401	8.17863	4.87691	3.50525	3.62885	2.10436	3.55123	3.99891	6.42292	2.26861	3.6968	5.18254	7.25673	9.3918	3.58915	14.7083
LHPP	6.76957	4.11443	7.28914	5.54085	5.35166	5.82225	5.45964	7.9332	7.87818	4.17299	9.86059	7.18695	7.79652	7.54805	7.26789	3.28531	5.77189	6.56179	6.75694	6.96501	7.88253	6.57666	8.63444	6.11817	4.5131	4.30676	10.058	5.66957	2.01449	4.61278	5.57536	2.79691	6.47808	5.97581	10.0981	3.43744	9.86884	4.27155	7.46688	8.97698	8.15118	4.19079	5.33462	8.0128	6.28379	7.67316	3.85435	5.74585	11.1777
GNE	4.35777	8.05317	4.23309	2.92964	1.85761	8.18951	20.7254	23.5252	1.90658	8.86233	13.146	3.12192	26.2095	9.66245	7.26831	5.55708	3.95879	41.5844	1.02796	0.972325	11.3204	3.90337	1.91312	1.24935	6.57638	2.10553	33.3615	27.8772	5.14318	1.29519	11.0651	6.10329	2.80486	6.74682	4.8748	7.50953	23.2102	7.477	11.1489	15.0235	9.05846	2.45976	37.0941	2.62066	1.47643	1.62397	1.35385	4.37839	3.04958
FAM162A	20.3362	18.4128	20.4062	14.352	31.7719	25.0477	15.2085	13.9057	25.224	14.7584	10.0685	16.4907	13.6098	40.4905	19.7812	10.4235	18.2842	15.2077	37.2861	23.0403	11.9688	19.0352	24.6129	12.9322	12.4176	24.2339	11.7364	18.5616	12.3321	13.7814	17.986	10.9558	17.8974	18.5734	18.3016	23.8698	7.8864	13.2573	17.8345	6.3369	24.7848	15.6849	6.28806	29.4995	11.4113	24.6043	48.9771	13.3257	24.238
TSTA3	34.1489	11.9607	34.8939	49.1926	22.8717	25.7081	20.6275	25.3214	58.1325	22.053	22.614	42.4815	34.8782	39.3992	41.0043	11.6015	31.4401	28.7812	46.1293	36.5497	38.3138	26.518	40.7622	46.0674	22.4875	17.6144	26.1976	23.3322	7.49705	35.6202	28.2492	9.26844	44.3353	53.9822	41.4833	63.1871	33.2518	28.6897	21.9903	20.386	32.9823	13.9127	22.0022	22.4362	29.4375	13.9936	56.1081	25.8658	15.0683
TPBG	2.54236	1.38011	3.71682	3.31863	1.61294	2.50591	11.8881	4.27081	3.64727	2.82366	4.61999	4.67811	8.32644	1.48678	4.15539	4.4258	8.63522	9.90683	3.67739	4.28017	7.61996	2.34091	1.721	4.55624	4.06939	1.15424	6.69108	5.07043	2.13643	5.60824	3.08112	1.29232	3.64034	3.20429	3.51717	8.77346	3.93576	9.34211	3.44354	4.83815	3.7769	2.8264	0.774241	2.68444	17.9784	6.68736	3.56909	6.93963	15.9944
ENO1	412.338	158.154	545.97	443.077	310.137	405.825	336.434	328.502	630.337	269.287	423.356	547.075	232.695	447.742	606.639	150.734	330.435	426.089	456.537	560.438	469.953	386.024	393.471	489.567	200.008	153.46	308.011	335.308	67.4323	516.625	431.118	83.3444	475.44	580.142	358.706	610.768	403.261	430.249	380.87	370.469	566.069	240.989	159.053	390.733	552.227	706.105	565.366	344.364	536.094
MXI1	7.48737	8.95483	8.41209	9.00101	17.7806	12.5788	9.14818	7.83906	10.1317	9.57032	14.4353	10.6631	10.1824	14.4973	5.88932	9.1672	13.3678	7.94909	11.31	5.29597	7.74322	17.3224	9.37392	3.62887	8.20243	10.2164	10.7745	13.8493	6.84386	10.672	22.0434	8.25955	9.68438	8.96889	11.0562	12.2273	26.8316	8.18948	14.8975	21.9028	5.90234	4.71001	13.0839	14.9173	5.49514	17.8363	3.99581	12.8441	18.6839
GYS1	44.4302	64.9709	19.9095	27.1891	26.8192	16.4494	14.357	17.4267	23.4376	36.0937	14.0144	20.2187	11.1499	6.91632	16.6429	66.1157	19.0978	22.6451	19.3519	18.8031	19.8529	18.2835	12.7463	26.6409	40.2505	44.9184	16.3628	16.4748	84.7957	31.6517	21.1319	93.5615	21.0258	21.7828	15.0318	19.5239	9.67016	22.1965	19.9471	9.99431	16.0492	69.9875	5.80252	20.7097	28.735	32.2284	21.5741	18.5464	19.037
SEC13	15.2251	10.046	16.1932	17.4519	13.0838	13.9928	12.443	16.3321	15.7022	13.3789	16.0269	16.2812	18.5799	18.3989	16.6867	12.1093	15.5995	17.8213	16.0208	15.9248	16.8085	13.7501	13.7618	22.9016	18.0837	10.9545	14.8792	12.449	10.2787	18.2772	18.6308	10.1702	15.0988	16.1312	20.3583	17.4263	19.4514	17.3642	12.4871	18.1204	18.1381	12.5752	16.6609	12.574	12.5782	15.6588	21.0972	12.3068	8.32393
MYOG	10.2011	17.8147	0.952122	2.1743	6.68954	0.715968	0	0.0187804	4.86383	6.52815	0	0	0	0	0	14.2676	0.0689951	2.78585	3.84686	3.34316	0.31388	1.37867	4.40072	77.5072	23.5989	68.0975	0.0369364	1.35112	44.7083	4.73617	0.0169568	44.3001	3.00185	0.00890408	0.271138	0	0	0	0.0083831	0	0.00769052	27.7582	0	6.44676	0.112599	1.95356	0	1.74498	0
RPE	7.07462	5.75111	8.37571	10.4882	7.86397	9.59367	6.66108	8.14778	9.34875	5.16004	5.72162	13.3434	7.76955	12.0825	8.01932	4.89987	9.97772	8.11454	7.25385	7.174	7.68686	8.19155	3.46626	4.95317	6.53237	3.25377	6.91464	8.27919	3.40671	8.36995	9.07805	3.343	5.34577	6.20781	5.99269	7.64953	5.57041	6.5733	5.06629	5.7562	6.64962	3.70546	2.97378	8.72229	9.84685	8.38504	7.06088	7.83854	15.1822
GALK1	5.61605	3.14572	6.1512	5.28631	3.53156	5.47621	4.13907	4.7844	6.75762	3.61317	5.82106	6.03003	3.29508	10.3402	5.77429	4.07605	6.26008	3.39791	5.86691	6.34713	4.79386	5.18613	17.3655	12.8402	5.23819	2.63153	3.88981	3.94588	2.03613	4.99941	7.87785	2.24771	6.3665	8.93224	5.58099	7.10801	7.69376	5.63663	7.06709	5.45849	6.40194	2.96448	6.77172	7.54295	3.40072	4.57561	13.1758	6.23833	7.59203
STC2	0.395398	0.323793	0.0883969	0.0763034	0.358401	0.165773	0.184304	0.105364	0.0741998	0.505428	0.592219	2.32693	0.513696	0.0194129	0.353842	1.04061	2.75833	0.329155	0.390038	0.29991	0.124145	0.0966846	0.0479406	2.15145	0.68262	0.715027	0.379912	0.206565	1.18508	0.483722	0.820256	1.44932	0.432468	0.119891	0.0976554	0.198452	0.149987	0.21085	0.250836	0.987052	0.0575283	0.588462	0.106268	0.155482	2.1378	10.8599	0.593878	0.543208	1.66992
GNPDA2	1.1634	1.89633	1.3399	1.69343	1.87292	1.49509	1.12371	1.0716	1.23899	1.30805	2.3451	0.908103	2.01718	1.38334	1.27138	1.98812	2.25594	1.2475	1.6442	0.835892	1.16115	1.56292	0.502188	0.557384	2.18268	1.14147	0.941306	1.60178	2.20803	0.880626	1.63613	1.58974	0.867571	0.9324	1.80914	1.27565	1.66178	1.74333	0.845598	2.03165	1.10608	1.25541	1.1973	1.39706	1.72567	1.08928	0.786815	1.32025	1.34897
SDHC	8.70534	9.3754	5.06064	5.90567	5.70115	5.01857	5.03301	5.12423	4.91193	6.22318	6.79232	5.34915	5.66095	7.86721	5.22807	8.79293	5.71174	5.92824	5.1489	4.3005	4.87622	4.43409	2.31446	2.7773	7.96345	7.25826	5.32203	5.59462	10.8594	5.61464	5.10605	8.08051	4.75403	5.34609	7.15368	4.7038	4.55901	5.78626	5.54982	4.9309	5.11871	8.95967	3.51341	5.47201	4.22143	5.62866	2.54334	5.4958	5.40437
IDH1	18.3917	21.4568	11.7725	15.2528	12.0981	14.556	31.6391	47.9045	14.9519	8.75392	17.9011	26.0384	21.0149	45.1738	22.0316	10.4542	35.9082	33.9833	8.43801	8.5675	20.5774	12.8532	5.83563	5.34106	14.3303	4.16127	15.6101	30.6719	4.56705	18.2217	25.1389	7.3007	17.2509	24.1042	60.6447	10.4327	14.0069	23.6757	32.2907	17.1536	22.0809	10.1019	8.35107	11.4191	17.2171	35.8767	9.18943	11.471	37.3725
AK4	6.16823	5.40585	5.96779	5.90403	3.48258	5.34563	4.64849	3.70161	4.6512	4.61611	7.04612	7.98132	5.4817	3.94926	6.64901	3.13807	9.55517	3.07655	3.50218	5.95426	4.01344	6.64135	3.69152	2.34507	3.82953	3.285	3.4725	3.70074	6.57436	6.18851	10.0949	5.65842	5.54745	5.57288	4.82626	4.23214	4.02455	5.25757	5.75053	3.75001	2.34929	3.15182	3.48393	6.03106	6.57444	5.9646	5.45476	4.23971	8.41898
NCOR1	6.78729	7.11815	6.1872	8.40832	6.24495	6.48213	7.72639	8.7986	4.99263	5.6664	7.49732	9.1431	6.13341	2.8751	5.76053	7.29024	8.58691	8.56408	4.01818	4.92647	9.00134	7.29941	1.84359	1.76384	5.22229	3.6838	7.21515	10.1917	6.56075	5.58456	9.0922	5.90321	6.62558	6.31958	5.58382	3.72169	7.54631	8.03274	6.85955	8.12751	7.03434	4.85025	3.64626	7.61498	5.4474	8.12413	3.34892	6.96245	9.00885
PRKACB	3.46422	1.77512	3.1782	2.06606	2.235	1.5884	10.6575	5.14448	1.1905	4.75784	5.50166	2.80126	2.97768	7.34077	4.63872	3.99737	3.99715	3.56541	1.31537	0.746141	3.6738	1.73382	0.824543	1.43387	8.35818	1.99255	2.43618	7.5056	4.4135	1.1634	3.64972	8.39633	2.14201	5.23799	5.45149	2.33984	14.1313	5.84325	8.23949	13.3186	5.2784	2.41005	26.4665	1.82676	6.32181	3.61813	1.95798	4.95356	1.34577
ARNT	6.61431	8.35824	5.86446	6.45839	5.77375	6.36079	6.68085	6.50692	5.2673	5.98126	6.95841	5.74487	6.10673	5.59445	5.63793	11.3196	10.5085	5.38907	4.08657	3.64224	6.43408	6.24873	2.85043	3.18118	7.67898	5.33896	6.04145	8.32333	7.86739	5.71315	7.44374	7.05271	7.22033	6.33083	6.57366	4.61085	7.06304	6.94964	8.8148	8.44708	5.77817	5.29464	3.80814	7.20505	5.72221	7.14602	2.22475	8.13567	5.80897
PKLR	0.00728752	0.00789488	0.0295589	0.0564015	0.0725549	0.0119393	0.027304	0.0109612	0.05989	0.017398	0.00584902	0	0.00785894	0	0.0106185	0.0202981	9.57734	0.00500298	0.0338137	0.055276	0.00631713	0	0.0249367	0	0.00768183	0.00919602	0	0.0115122	0	0.00780868	0	0.0155617	0.00556201	0	57.4097	0.148885	0	0.0348381	0.0146784	0.00606407	0.00897717	0.0298143	0.00518216	0.1174	0.00938836	0.144695	0	0.202427	0
ALDH7A1	10.8935	6.23563	14.2297	14.9347	8.95496	6.82039	9.0172	12.6188	15.2073	8.71724	20.1851	13.1652	13.2778	11.9142	15.3336	6.91455	15.6589	11.032	11.2772	15.4093	17.5314	11.014	8.48763	9.98456	12.8797	6.08586	6.17185	13.0176	4.48066	13.7047	7.01267	5.16995	10.5075	12.6644	11.9496	8.88865	15.0065	16.3096	14.1124	14.1276	14.2506	7.80201	8.28227	12.8216	13.9378	0.548128	10.3805	8.49022	10.3038
CHST1	0.219422	0.190167	0.796547	0.0495311	0.146776	0.4179	0.468599	2.51651	9.83218	1.78106	0.647203	0.168077	4.41901	0.0244316	0.459591	0.897641	3.45555	1.76244	0.341065	1.76002	0.47551	0.359631	0.619432	3.48082	0.711229	0.339185	2.94933	0.268632	0.79112	0.346792	0.193691	0.866822	0.414483	0.332508	0.754427	1.90071	2.23906	0.861012	0.592958	1.21419	0.121633	0.210957	1.83336	2.70414	19.0383	5.04501	0.235434	1.19518	0.710206
EGFR	11.2785	13.9009	17.3327	19.9788	13.4949	15.6213	29.1531	22.1916	16.2804	12.5201	21.7055	29.5711	17.4824	5.36286	16.7662	9.91077	30.5716	24.5807	11.0005	14.7694	30.832	20.5542	3.77774	2.39025	8.18499	5.28276	11.9782	25.3509	4.73481	11.1245	21.8478	5.53697	15.6803	13.6506	18.8896	9.88933	17.8807	20.6324	19.5624	15.1151	15.9253	6.65816	6.09521	19.0836	25.8171	27.9808	5.26827	17.0032	14.3878
PGM1	97.6514	65.8673	16.3171	17.8948	32.4022	10.875	9.96551	12.6608	21.0078	44.9504	31.6887	18.5244	11.8518	17.7633	15.3644	71.2198	24.3929	14.0905	14.4366	11.1064	29.4454	13.0094	12.9531	21.5655	80.0311	75.9281	11.9881	14.5278	159.098	39.8066	14.0319	94.6149	18.9903	14.2608	35.8699	9.44242	18.4232	13.287	14.748	17.1295	14.4662	90.3365	8.83673	15.6945	15.9491	7.2428	4.16352	9.21995	19.3719
UGP2	40.7483	64.1385	13.8019	19.3052	23.0801	17.4308	20.1294	18.1457	11.7612	29.0189	23.5408	15.4292	29.8943	25.0667	17.9893	53.3142	16.7267	27.5044	11.6124	10.0463	17.3887	14.9122	14.253	14.1165	53.9328	47.372	19.4712	23.596	85.8037	19.7947	20.1216	81.4468	12.9292	15.6981	13.8702	11.3352	21.9317	16.1723	16.809	19.6742	18.5792	49.2695	14.4672	14.3526	10.5883	14.9075	8.7877	12.9786	10.5943
PRKAA1	6.00298	5.71281	5.25649	7.40958	4.69409	7.21061	6.5328	9.61943	4.76133	6.8152	11.435	6.59762	13.311	6.45034	5.90676	7.54637	9.30343	10.9824	3.72279	4.48051	9.41443	7.51048	2.13868	3.35699	9.13469	4.26993	11.6416	8.28209	6.39523	5.3296	7.16343	5.61169	5.28495	4.83228	7.18941	4.03857	7.99787	9.13034	4.96136	11.749	5.11728	4.536	4.47958	5.57056	8.35894	8.50089	2.09329	6.22271	11.377
ANGPTL4	11.5379	0.732818	6.89046	9.06262	2.35331	6.56752	31.5649	12.7412	6.89834	6.67377	29.5581	26.6059	7.56008	10.8048	6.80421	8.49453	24.643	13.3933	4.01604	9.4104	7.95595	6.45848	38.9813	130.514	25.3292	5.41255	18.8565	14.9298	16.9287	19.5618	17.3446	1.822	4.97503	23.9054	37.4368	9.20272	10.3688	10.283	16.4994	9.23633	6.65202	15.4787	0.333433	4.24127	30.6194	6.79479	19.4464	7.51321	6.14183
SDC3	2.55661	1.72849	3.87857	2.60133	3.58657	1.92178	2.68044	2.1298	2.18981	8.33146	46.6424	3.35602	4.13707	0.432861	2.42314	7.87668	15.2883	2.36676	2.00172	3.56099	2.97909	3.15557	3.39956	5.55064	18.4007	1.65225	3.3123	2.34986	6.04765	1.16578	2.74242	6.22034	4.21366	2.3757	12.4544	2.79967	18.953	6.24646	3.02698	23.0846	1.50817	2.05655	5.26204	4.59702	9.7209	7.15919	9.24798	7.71694	3.50191
PPARA	3.42923	5.62415	1.93536	2.92288	2.77149	2.51825	1.9175	2.94259	1.57871	3.86142	2.35153	2.17794	1.73388	0.986071	1.56462	4.2813	5.29954	2.23036	1.113	1.47351	2.63481	2.50373	0.725986	0.62003	2.7263	2.25654	2.60121	2.95141	6.50379	2.06921	2.92734	4.86798	1.779	1.6159	3.82363	0.792595	2.84062	2.51606	1.9545	2.74664	1.52812	3.38574	2.23327	2.68547	3.23527	2.25814	0.372811	2.31522	5.73747
PPP2R1B	5.22394	3.36483	5.87759	6.44178	4.1304	6.7026	6.05468	6.90723	5.54605	3.72337	6.34613	6.12969	4.59257	4.94665	5.99215	3.25208	11.4393	7.10244	5.56701	5.87895	6.44549	7.07786	1.6224	3.84923	5.28214	3.13479	6.11001	6.01431	2.04055	5.65532	6.998	1.18827	5.96972	5.66285	3.01408	5.26204	4.0112	6.29304	4.46041	3.37832	6.69219	4.23489	2.20462	4.8001	7.6077	4.09251	3.80671	5.75202	6.59882
INSR	2.22351	3.08123	1.41872	1.02198	1.90499	0.738733	2.0697	5.81701	0.982669	5.55822	24.4658	1.14666	8.27831	0.250423	1.45766	4.97158	6.70147	9.8857	0.599704	0.942965	8.40601	2.11018	1.18375	4.552	9.38874	2.37273	16.4346	6.17138	5.70579	2.27493	1.55073	7.5899	2.27804	1.3513	9.09345	0.878695	13.195	6.08274	3.83141	15.8803	1.49208	3.77909	6.33364	1.75865	3.27136	4.96721	1.22023	3.2295	9.22666
GCKR	0.0545799	0.275934	0.182025	0.101694	0.0830196	0.362646	0.140873	0.00456079	0.12958	0.0772164	0.0389389	0.145997	0.0130799	0.189069	0.207655	0.122463	0.100532	0	0.0956713	0.142597	0.0683399	0.329576	1.45261	0.143409	0.0831034	0.084179	0.0224249	0.0431102	0.0143378	0.0909738	0.111184	0.00647499	0.245312	0.233532	0.0512131	0.0396471	0.0053119	0.00483186	0.158794	0.0100927	0.100852	0.0595453	0	0.170969	0.0156254	0.0433478	0.0385599	0.178982	0.201897
ISG20	3.46438	0.715815	1.94645	3.06495	1.64461	2.29875	2.60569	1.65055	1.80578	2.18574	1.8634	0.876162	3.97075	3.32137	1.83869	0.8805	0.823294	5.30458	2.7364	4.76807	4.79324	1.37913	5.3953	6.32151	2.0376	0.958037	7.42183	2.44369	0.539101	3.35952	1.99348	0.497984	0.961132	1.67227	1.35355	4.94439	0.828413	2.67561	1.48744	2.23593	3.09139	4.2785	0.377728	0.960086	5.77498	3.6775	8.88032	2.42242	2.70935
CLDN3	0.0299509	0.0648942	0.461639	0	0.018637	0.0736038	0.819179	13.2896	0.0123071	18.3169	27.6447	0	44.1048	0.0666979	0.109102	0.0104279	1.80673	37.1653	0.0972793	0.0227178	6.88012	0.775095	0.128109	0.0196741	17.8694	0.151179	105.524	4.63674	0.761222	0.0320928	0.905018	9.40169	0.194304	1.2388	34.1997	0.012238	162.613	7.71983	2.28236	98.5193	3.40358	0.477881	32.3305	0.205063	0.0385851	0.713616	0	0.0259986	67.5458
PC	5.66535	4.93094	8.2882	6.36942	4.38658	3.40152	8.45673	9.72689	4.40721	5.18726	11.2643	9.92277	4.79394	2.26232	6.3178	4.05927	9.54875	10.1697	5.80104	10.5672	15.6621	4.22345	3.70095	6.7578	5.76491	2.46967	6.40139	6.91306	3.82042	6.73274	10.367	4.93191	4.19864	14.2872	15.9217	2.61476	11.3965	6.28866	12.094	8.38117	11.65	6.13422	14.4688	5.86236	15.3187	16.4972	5.63873	7.02456	16.8487
CITED2	14.7362	19.7475	22.6569	31.9297	37.6104	21.2265	27.211	21.8365	10.4775	25.1547	23.6426	25.1767	14.6093	45.6274	23.2977	16.3404	36.7219	27.57	14.1359	6.39361	19.3175	19.8273	26.7061	16.8977	12.8837	44.0666	21.0004	28.2782	7.37546	8.58046	53.859	19.0927	15.3828	43.2959	51.6172	16.7906	29.9616	25.401	51.2678	39.7488	34.6785	6.05957	21.8515	24.5276	17.8305	4.93127	7.4652	28.0591	4.59358
HK1	57.2802	63.4052	56.7755	52.3725	80.7138	62.8976	57.967	67.8713	41.7991	43.873	35.807	62.7704	32.9642	35.0638	59.835	43.9919	29.9279	46.7535	43.1878	56.9867	47.1802	61.9724	31.7715	38.759	28.8336	53.3119	49.1737	60.9774	42.4107	52.8565	105.829	41.7134	54.2628	65.6748	26.0448	42.2758	25.7809	41.075	62.3679	26.1154	63.2505	40.496	14.9877	66.8984	49.5703	59.2949	21.2511	45.7209	32.9416
ACTN3	29.3586	0.769864	0.202429	0.230914	1.27258	0.373272	0.0121948	0	0.0222906	4.29535	0.0130618	0.0118724	0.0117001	0.00966427	0.0118564	7.68699	0	0.052138	0.0503407	0.0370319	0	0.0561542	0.00928126	0.00712674	2.70472	9.04274	0.00802372	0.329925	20.7771	3.92936	0.00736706	1.80709	0.115928	0.0232109	0.00654439	0.0221655	0.00950312	0.0302551	0.0254949	0.013542	0.00334123	0.341777	0.0385752	0.519974	0.0489199	0.0904752	0	0.0141266	0.0601997
B3GAT1	0.0333982	0.0325635	0.0257386	0.0193863	0.0187039	0.019151	0.00875926	0.0414435	0.0137236	0.178072	0.0777364	0.0109642	0.072034	0.00446248	0.0194656	0.0232562	0.0384481	0.0217819	0.0108476	0.00506652	0.0217132	0.0302508	0.00857126	0.00658155	0.0492874	0.0379303	0.0370496	0.0092329	0.0532991	0.010736	0.0170087	0.0588377	0.0267648	0.0107176	0.0846125	0.055951	0.182836	0.0758388	0.0336351	0.0430764	0.0164567	0.0136637	0.0748109	0.0295919	0.062388	0.0172413	0.0172541	0.0478351	0.0535355
ME2	3.11764	3.56069	2.31916	2.51802	1.74723	1.45052	1.52537	2.64193	1.8588	1.89885	3.30525	3.6814	4.38391	1.63539	2.12436	5.18889	2.86935	4.18548	1.0438	1.55485	3.93011	1.66108	0.446246	1.01994	5.28175	2.7153	4.07634	2.8069	4.26354	1.71178	1.59256	3.71596	1.69206	1.58243	1.74782	1.61358	2.35953	3.0993	1.39955	3.85236	1.96542	3.15117	1.26497	1.78247	3.05823	2.8693	1.94992	2.31887	5.09288
SDC2	4.30281	4.93937	1.46718	1.1719	2.63818	1.48154	0.901402	1.31273	0.580711	7.06249	14.0198	1.52348	2.85306	1.37875	3.02446	41.0795	18.9149	1.18966	1.77204	0.941142	1.46205	2.60147	4.78551	8.33282	21.7293	5.90734	1.30957	3.68762	18.0835	1.54135	1.5594	12.6192	8.06395	1.97663	6.87048	1.40926	7.84721	5.11727	2.75899	9.26085	0.601027	4.92139	4.94402	2.93394	4.12897	3.73466	0.762195	6.81648	6.02121
P4HA2	2.87236	3.91885	3.73	4.67767	3.9433	2.74998	6.85896	2.58039	2.41403	4.35015	7.38621	3.45505	6.14676	2.7125	2.81197	6.38784	5.14392	3.02103	2.94039	2.42379	3.65507	3.67989	3.54373	6.59785	5.89706	2.29368	4.94554	3.25777	4.08253	4.36899	3.99986	4.40135	3.25926	3.84543	4.56163	3.3174	8.35169	3.63666	5.20089	6.89965	4.17412	2.28966	6.03665	4.98879	33.3354	7.36414	5.9499	6.27225	7.68109
MLXIPL	1.80683	5.63616	0.0321434	0.465109	0.927061	0.0778993	0.151426	0.143036	0.110715	1.63021	1.20212	0.0997269	0.448669	0.0141181	0.161657	4.21867	0.259091	0.282902	0.0330931	0.108196	0.140824	0.492198	1.78295	0.400828	2.03825	3.79003	0.252012	0.813717	4.95098	1.22277	0.134527	4.58174	0.381044	0.101723	1.35279	0.0679992	0.73231	0.24309	0.218145	0.389063	0.0366078	3.29075	0.301487	0.277671	0.0153139	0.843376	0.012597	0.0584711	2.23277
SLC37A4	2.57529	2.11165	1.61626	1.36456	1.27815	1.16216	1.74256	2.8112	1.63483	2.44945	4.35668	1.77524	3.80496	1.33792	1.58185	2.59216	2.72111	2.32059	1.01318	0.659699	3.31514	1.04292	1.85743	1.79092	3.52089	2.12886	3.65858	2.09013	4.4662	1.54001	1.9644	2.53888	2.34686	1.67594	4.19702	1.74916	5.1787	2.25828	1.93611	4.33208	2.27196	4.42886	2.16246	1.39615	2.86076	2.0845	1.34086	1.22883	3.59374
TGFBI	7.96372	6.84637	8.63028	6.61725	6.49985	4.18429	114.415	5.92118	7.18312	4.7181	7.15836	4.06325	6.78623	3.8363	6.73269	20.0586	11.7911	11.9993	3.89007	2.84793	2.56862	2.93333	5.23696	16.0562	17.263	3.10111	4.00347	9.3851	8.51601	3.81116	4.341	9.50963	15.928	5.6216	12.4808	36.9139	6.3293	16.1742	8.05793	19.4107	4.87799	4.20952	1.38622	6.03293	296.968	16.7298	47.7394	40.9341	18.7806
PFKFB2	2.09928	5.20115	2.2934	3.22195	4.24484	3.06839	2.83488	1.77155	2.47404	3.84741	4.42848	2.49581	2.61497	1.51163	2.15508	2.66952	2.22801	3.27927	3.46908	3.29815	2.05654	4.33356	2.98028	1.63952	2.41798	2.5853	2.49483	3.20097	2.82885	2.15317	3.16474	2.14351	2.21055	1.98538	1.73127	2.02287	2.39598	2.47015	2.02624	2.44122	2.29445	5.42711	1.56331	3.19801	2.17658	2.17249	1.15099	3.22386	2.57002
CHPF	8.42445	9.1697	28.8176	16.6047	10.1586	9.90181	15.7925	21.6379	22.7895	22.0271	40.1583	25.2536	40.3213	5.0619	17.2523	10.4253	19.0952	22.7122	22.614	21.1503	35.8822	10.231	14.1119	51.1234	29.0692	8.95103	32.0603	13.2857	8.76181	13.9396	15.4849	15.3294	16.9188	18.6152	27.4223	20.858	45.0765	26.8397	15.7081	31.0557	16.8734	11.8501	25.9122	14.8224	89.0521	84.4046	52.6615	26.8118	33.6809
PMM2	2.30592	0.900289	2.02447	2.59136	1.05596	1.98091	2.03272	2.38919	2.27241	1.64636	1.71655	2.96301	2.05612	1.66723	2.89992	1.02006	2.10987	2.40712	2.78136	2.44563	2.56132	1.92887	0.230566	0.714731	1.4784	0.752645	1.59646	1.76615	0.67852	2.22214	1.94028	0.7061	2.22849	2.28329	1.8335	2.12098	1.93234	2.32241	1.59175	2.36942	2.29028	1.51309	1.20319	1.62018	2.55915	1.98795	0.614878	1.6052	2.25554
B3GAT3	3.89747	5.3034	6.41265	5.05779	6.6351	3.86852	6.65358	4.77487	9.53796	4.7524	12.6071	6.95634	12.7278	3.30373	6.54909	5.65218	11.6801	5.03305	5.28666	5.04229	7.79232	5.72094	22.3709	27.2842	11.6873	6.20719	10.2394	5.36863	4.72804	7.41779	4.91948	4.27877	6.86686	4.67897	19.2058	8.17448	13.3181	6.98696	6.16201	10.7756	6.13207	3.41406	6.54877	8.2851	14.5671	18.4351	14.2831	8.04181	17.3529
LCT	0.00579372	0	0	0.00747339	0.00180258	0.002373	0.00651216	0.0043572	0	0.00230529	0	0	0.00624801	0	0.00211048	0.00605151	0.0987121	0.00397747	0.0134413	0.00439455	0.00251112	0	0.0099126	0	0.0061072	0.00731102	0.00214238	0	0	0	0.00786819	0	0.00442191	0.00619743	0.244635	0.00236733	0.00253739	0.0138485	0.00194494	0.00241053	0	0.0047406	0.00411992	0.00466676	0.00746393	0.0253078	0	0	0.0428631
ALDOC	8.05372	5.16014	10.0273	6.40462	10.3311	13.296	6.75269	6.56648	6.24383	8.68026	6.20772	7.17311	3.32371	16.2633	7.92298	4.51457	9.78754	2.44689	8.40496	6.90449	4.06678	14.9346	9.25308	2.94477	4.28596	5.30345	5.79231	8.44566	2.67283	9.29994	13.8753	2.78283	8.04653	9.15857	9.30727	2.07138	4.20635	5.58617	12.35	3.73579	8.18324	3.39087	3.86898	9.38958	4.89392	25.399	1.58991	7.7319	21.7893
FUT8	1.20452	1.57638	1.50612	1.18274	1.76305	1.31093	0.862049	2.12868	1.252	2.49948	3.19053	1.01584	5.87761	0.847194	1.1099	2.37942	2.95031	3.17866	1.21027	0.928752	2.04136	1.25522	0.867211	1.39914	3.79408	1.16783	3.1968	1.4957	1.75715	1.32117	0.875911	1.74516	1.33008	0.79805	1.9066	0.956418	4.8288	1.99882	0.946364	4.45469	0.975167	0.878398	13.1052	1.86476	3.44102	1.92685	0.767237	2.79561	1.21135
LDHA	143.14	91.1424	130.767	117.89	121.911	124.626	101.605	49.29	123.59	104.149	71.2276	119.971	85.7776	110.824	130.697	129.114	119.306	128.24	175.566	148.781	90.3132	122.043	55.7125	105.349	115.643	138.027	72.1504	69.9454	152.426	156.866	107.228	63.335	94.1258	110.99	81.7331	295.144	67.0172	164.085	82.0996	73.4579	87.5827	188.886	28.9405	96.9844	213.245	120.268	212.985	102.929	100.539
PDK3	1.16101	1.11205	2.26843	1.42454	2.34352	2.80096	1.5596	1.85276	2.33297	2.48444	5.46031	1.49513	2.48881	2.79986	2.35701	1.58238	4.16613	1.60381	2.49641	0.934323	2.12942	2.14349	2.30131	1.9717	2.6566	1.25066	2.97901	1.3979	1.07118	1.84329	2.58138	1.57218	3.4958	1.47918	2.72442	4.00918	3.95613	3.93704	1.83942	6.47989	1.48688	0.863083	2.23011	2.47479	6.10136	3.91321	2.03683	3.20775	0.672135
GCK	0.0138855	0.0300856	0.0600759	0.00597037	0.0172806	0.0341235	0.0138732	0.0208854	0.0152151	0.0478832	0.137451	0.0253246	0.0748715	0.00824581	0.0134882	0.0483446	0.0852536	0.0349529	0.0128856	0.0737255	0.084256	0.0239561	0.0871092	0.0547265	0.097579	0.0408846	0.0273842	0.0292468	0.0164144	0.0148785	0.0157144	0.0691859	0.0353259	0.00990206	0.150764	0.0264771	0.0810832	0.0848189	0.0528286	0.10399	0.00855249	0.0302975	0.0559528	0.0484666	0.0178885	0.0808719	0.0441446	0.0602659	0.245406
ELF3	35.6051	17.9986	17.3754	21.4237	4.12566	32.1699	58.2928	111.655	24.911	15.9385	63.2356	36.9212	112.335	54.0113	43.108	9.55137	6.199	112.768	10.8282	26.8597	107.773	23.301	38.8701	10.3556	15.0546	9.40777	272.582	89.4672	0.395179	35.2403	63.2562	6.23489	30.1676	66.8806	27.248	4.42305	70.0845	22.9336	100.692	53.0361	53.7584	26.9189	11.3256	7.99049	4.33059	7.76271	6.52643	19.2027	41.0987
PPFIA4	2.35266	2.26554	0.0972597	0.291556	0.544241	0.136852	0.17968	0.0118251	0.116298	1.43115	0.105692	0.0344125	0.0720655	0.0472705	0.0329341	2.3499	0.181011	0.257719	0.167801	0.146099	0.103928	0.308574	0.245481	1.17745	2.6747	4.22872	0.0276177	0.206473	4.96979	0.492808	0.112107	2.91065	0.375022	0.0266306	0.0663918	0.130101	0.0430391	0.0579415	0.105568	0.0556068	0.0193693	3.06684	0.0265552	0.329295	0.278527	0.430831	0.0328049	0.156961	0.150256
NUPL2	2.75737	3.35643	3.26131	3.55113	2.56416	2.82431	3.25483	3.37838	3.28236	1.81177	3.61249	4.13631	5.73038	3.40593	3.60384	2.26084	3.90774	3.88194	3.15897	2.44281	4.24252	3.02318	1.67473	2.08969	3.38562	1.96307	3.11862	4.07626	2.06111	2.76727	2.79811	1.73563	1.98109	2.02554	2.94693	2.70329	3.43334	2.92461	2.12414	3.49077	3.23519	1.76274	1.71839	2.59412	4.19404	5.25442	1.58027	2.2873	7.47338
CHST12	0.59802	0.741326	0.607845	0.530523	0.500082	0.300121	0.761623	0.517294	0.559451	0.656477	1.12026	0.375055	1.05403	0.282138	0.509731	1.30028	1.43457	0.424342	0.379475	0.326305	0.729433	0.448582	0.875554	1.22816	1.17853	0.532419	0.99379	0.469548	0.820099	0.49642	1.0224	0.724312	0.735148	0.540239	1.37589	0.573697	1.51139	0.869141	0.637176	1.12309	0.594726	0.376175	0.796718	0.617828	1.98085	1.01373	1.27843	1.0259	1.10461
DPYSL4	0.0961145	0.390468	0.716349	0	0.5906	0.41827	0.657201	0.194262	0.725706	0.645359	0.241069	0.644208	0.78386	0.101668	0.498916	0.372284	2.21294	0.894907	0.90308	0.186814	6.1706	0.58556	0.894166	1.78358	0.291281	0.341116	0.0799669	0.0332134	0.53259	0.025747	0.0611854	0.282208	0.0779417	0.40268	0.529035	0.157091	1.03656	0.612636	0.0806636	0.524859	0.181299	0.348982	0.243487	0.164515	0.0851279	0.319652	0.0429701	0.203363	0.303688
NUP93	3.7897	2.73765	5.24657	4.63203	4.00844	3.84679	3.19152	5.11904	4.9096	2.68996	2.71713	4.73571	3.43281	2.45244	4.35986	2.55895	4.17179	4.66939	3.75528	4.72499	5.05979	4.15141	2.53258	3.92762	2.60959	2.36082	4.76026	3.40334	2.15286	4.17637	4.03331	2.0085	3.58542	3.1228	3.61495	3.7046	2.15643	3.04403	3.0229	2.99951	5.51889	2.43498	0.788235	4.47395	5.03891	7.63473	3.80862	3.72684	4.25667
GPC3	1.85087	14.2646	1.43295	1.27089	2.8946	1.52192	1.1918	1.12203	0.925367	12.1137	21.5316	2.25641	2.43618	0.401201	2.0611	19.489	22.1336	1.49289	1.38452	0.709951	3.18442	4.60772	16.7726	8.26554	29.5471	5.58587	1.76957	2.44023	38.9423	1.65144	0.578219	35.2329	7.73991	0.843125	4.1941	0.379573	2.63829	2.93815	4.08709	7.00383	0.494145	3.57015	1.83661	7.9134	4.56941	33.9267	0.201362	3.13995	105.189
ALDH9A1	35.7178	42.4997	46.7493	57.8868	53.825	82.2672	58.5425	43.5349	56.9627	46.3788	48.91	53.5194	48.8183	96.1778	46.3335	31.4296	56.9722	31.8061	50.0959	38.2823	32.7615	59.2941	22.6463	17.2074	41.8392	41.855	30.2369	45.2447	28.7917	74.1156	58.9827	34.866	57.0261	71.1036	82.2281	40.8398	66.3499	53.3093	45.0303	51.3322	42.8553	19.9948	40.8565	72.03	26.8375	20.6903	15.8054	54.0188	24.7265
GMPPA	4.69542	3.76854	4.81934	5.46117	4.06193	4.37107	4.77618	5.78667	6.46756	4.52832	6.99428	5.20863	7.27891	4.46623	5.86126	3.6633	5.04941	5.3831	3.70968	4.37857	6.38449	4.08745	8.62131	12.0928	5.77942	3.17028	5.64547	4.64152	2.94028	5.06955	5.41188	3.14095	5.22253	5.45646	7.52973	5.59775	8.80859	5.68007	4.74074	6.2419	6.08166	3.13621	5.42065	4.02424	6.86047	12.114	6.19518	5.15379	6.24855
AKR1A1	33.2426	29.1588	35.8437	33.0629	27.7338	30.3207	33.1826	57.8619	48.9918	21.6673	33.0051	37.7215	49.9106	68.0166	50.7709	20.8492	34.0381	44.3042	24.2739	27.7787	69.8093	27.0413	39.1581	36.0833	36.7553	18.0275	56.5564	41.0365	9.92899	34.0478	38.9646	15.3969	57.6715	42.1328	82.9144	24.2686	40.7741	36.5049	42.122	36.6348	55.3631	22.3633	30.3027	31.656	25.2324	36.4368	38.2809	28.1767	36.3235
RARS	20.0157	14.331	27.9953	26.3651	23.4209	24.3268	18.5046	18.6766	27.4352	15.0895	13.2045	24.6186	17.6939	19.8461	24.3538	11.3473	22.3422	23.8563	24.6294	25.8249	21.0825	23.3422	19.9803	25.7095	15.2317	13.4979	18.164	20.1043	9.24288	21.6263	18.836	10.1584	19.1115	18.7119	15.9185	26.903	19.0267	23.1814	14.9511	17.4164	25.0068	14.3696	12.1947	22.7303	21.7408	14.5324	22.9162	19.122	18.5873
OGDHL	0.336644	0.122771	0.137898	0.0214971	0.0352587	0.0273035	0.0749285	0.370989	0.013696	0.18302	11.621	0.0255317	0.204884	0.0148451	0.0437095	0.178713	0.346872	0.0526292	0.0804202	0.106183	1.73935	0.0172514	0.0285135	0.0350311	1.68295	0.0630901	0.453562	0.129001	0.145786	0.0250003	0.074688	0.861219	0.00763173	0.078438	3.21686	0.0980581	7.80967	0.228387	0.174551	2.7569	0.0164236	0.0927266	6.98254	0.0671193	0.0343518	0.783565	0	0.0173596	0.0821968
PHKA2	2.16799	3.30554	1.5993	1.98972	1.42267	1.58207	1.7148	2.38369	1.60803	2.27849	3.6446	2.09493	2.61599	0.890293	2.01513	2.31595	4.83201	1.93515	1.053	1.62679	3.86668	2.33133	2.35715	1.78499	2.64167	2.02115	2.22061	2.52019	3.0724	1.49435	1.73757	2.61708	1.76594	1.27782	4.60129	0.79778	2.89286	1.73577	1.88544	2.73592	2.02511	1.60793	1.79409	2.0969	2.21587	5.2729	0.596202	1.48754	3.89777
DLD	23.7629	30.424	13.7041	17.6249	15.0307	14.614	15.3971	19.6933	11.3622	18.0221	26.9613	13.6282	17.1579	16.9369	15.4131	21.0546	20.2168	23.0787	10.2641	12.5951	18.1643	13.8955	6.85	9.15746	24.4186	26.833	13.3855	18.135	33.6705	15.3352	17.9253	33.1753	13.1709	13.5027	24.2068	10.71	18.2849	15.9956	11.8038	18.0269	17.0157	29.4805	11.0348	12.8619	9.04019	6.56825	5.10225	10.4104	22.5924
PPARGC1A	2.49234	5.86028	0.48695	0.502612	0.710997	0.54779	0.318282	0.732592	0.311564	1.65934	9.81875	0.205511	0.531876	0.248587	0.171348	3.14344	2.22585	0.24822	0.143333	0.151769	2.48911	0.684356	0.594587	0.332045	3.61332	2.68659	0.638637	0.842889	5.5232	0.968556	0.345625	7.48099	0.703285	0.230303	5.24703	0.0387271	6.98121	0.776133	0.466652	4.55679	0.355669	2.43569	8.88775	0.723848	0.434141	0.0362432	0.015345	0.339754	0.13418
NUP107	2.70817	2.56373	5.40766	3.71219	2.7054	3.27411	3.05688	3.16972	3.23572	2.29382	2.16992	3.87691	3.26673	2.17744	4.04626	1.94326	3.87739	3.08554	1.84496	3.38127	3.76484	3.31333	1.1927	1.9853	2.64682	1.959	3.01188	3.05192	2.28245	2.29985	3.273	1.76282	2.40297	2.52485	2.14674	2.84653	2.83006	3.40561	2.20777	2.57218	3.85725	2.01514	0.988166	2.48246	3.95859	6.94244	2.13604	2.56378	6.61067
LHX9	0	0.00197939	0.00444657	0.00235682	0.00113693	0.0029934	0.00958385	0.00274818	0.00150155	0.001454	0	0.00599817	0	0.00162753	0.0146424	0.00127227	0.0050481	0.00376302	0.0135643	0.00277174	0.00158382	0	0.00312605	0.00720114	0	0.00230561	0.00540499	0.00144315	0	0	0.00124066	0.00195081	0.00557799	0.00781771	0.00220424	0.0418076	0	0.0276594	0	0	0.0101283	0.00299	0.00519705	0.00294343	0.00235383	0.055142	0.0653482	0.0158601	0.00675868
ERO1A	48.5107	13.9681	26.8859	31.121	18.0767	91.7898	38.6028	16.2815	31.3106	17.4074	10.6548	29.809	16.3224	58.7899	28.6519	12.9788	7.72853	33.8221	14.7986	24.2089	15.0746	71.651	80.8963	6.62483	5.52067	8.11118	24.2303	36.2081	2.33064	30.559	34.121	3.58127	12.3312	44.2465	5.62303	11.0159	14.4087	27.5946	33.5559	15.9199	28.7504	4.94093	5.94585	34.6953	17.5939	55.0712	22.5607	58.5386	18.0394
CYB5A	2.88649	2.76309	3.30713	3.76296	3.16012	2.62126	2.0908	2.94268	2.37048	2.44214	4.788	4.42974	8.16758	6.13324	2.77605	2.22821	14.7785	5.55106	3.55693	2.14746	3.17695	3.32409	2.0259	1.61213	5.42024	2.19476	4.39669	3.37213	1.94948	3.16536	2.62076	1.81765	3.58991	2.42949	28.481	1.28239	2.22864	3.89452	2.84439	2.17347	3.51284	2.06512	1.44657	3.44712	2.63127	10.9466	1.27653	2.0877	5.84518
IDUA	1.08272	1.52949	0.723552	1.21204	0.638109	0.652492	1.12941	1.37026	0.878035	1.3133	4.56319	1.52407	2.57698	0.271914	1.10155	1.50454	1.91961	1.26066	0.509014	0.839333	2.13343	1.222	3.43559	3.5404	2.57924	0.860688	2.69143	1.46927	0.496175	1.09371	0.82588	1.925	1.13578	0.772108	2.22686	0.49892	4.26137	0.927262	0.871037	2.23451	1.1046	0.542475	3.23231	1.07958	1.9663	1.01143	0.602756	1.63541	2.59948
GPC4	2.99259	7.62995	3.75693	3.71629	8.87034	2.63417	1.46134	2.26506	2.10215	6.93322	25.8001	1.33011	9.81861	0.531082	1.60574	6.00507	5.78135	3.3035	1.62413	1.70387	5.615	5.09995	2.52056	2.05672	11.5233	8.94568	8.51988	2.01128	12.3589	3.0912	1.34512	11.8608	2.35154	1.01492	5.48965	0.700977	16.4653	4.37949	1.84393	11.0138	1.64421	8.02256	7.01321	5.57077	6.18928	9.08841	0.709269	3.19869	12.0517
HSPA5	114.492	64.9628	184.528	185.959	146.83	133.754	216.439	128.76	128.078	98.7107	152.332	257.882	153.684	109.782	152.846	77.2663	149.662	192.234	121.999	96.6553	188.057	134.421	68.7173	147.797	104.152	73.2482	150.936	178.739	65.9116	181.425	142.883	73.4228	132.982	153.601	115.531	164.713	112.023	142.255	117.281	106.227	164.979	82.0405	88.8722	112.064	243.875	612.119	120.747	148.757	191.84
PYGB	28.439	18.7839	35.0741	21.612	21.4961	19.5374	55.118	48.997	26.9252	32.5542	197.306	42.1379	36.2426	23.9041	40.9719	17.0236	55.1629	47.4993	22.4219	34.273	122.089	22.6378	26.6522	22.258	58.8227	9.96048	41.7772	39.5665	15.6372	11.3822	45.3279	32.4177	26.6947	54.9144	102.988	21.2297	176.312	29.7463	60.5253	84.2223	66.5485	16.3924	69.0384	24.5903	111.511	50.6628	23.4539	48.6246	95.5133
IL13RA1	28.8014	35.0169	43.0929	47.4916	27.0102	45.9312	41.568	24.3546	37.4622	27.2225	27.102	49.9496	30.2409	40.1387	36.628	33.1094	40.8765	30.1951	39.6253	26.1059	18.2556	41.2011	27.1322	29.3129	26.0128	22.3846	19.5671	34.4577	24.2712	32.853	41.3718	17.9941	37.1028	42.5372	22.3428	20.0668	24.0043	36.1459	39.7114	32.1291	30.883	24.3303	7.32339	26.4013	42.1133	11.503	17.5187	43.7702	17.8426
EGLN3	8.28067	0.704969	2.17045	4.16686	0.805005	3.18348	2.59545	2.0141	1.32098	1.22757	0.353739	9.42457	4.60198	7.42923	1.45059	1.91721	9.23068	5.78624	0.596657	0.587975	0.276424	5.89746	5.64663	1.78134	1.34183	1.83206	10.2482	9.70839	2.37211	5.39205	15.196	1.90167	0.868655	10.6196	3.54679	5.31361	1.71223	5.63093	7.72496	1.2534	4.11505	1.23673	1.24442	1.00028	4.51896	10.5979	4.51057	3.38243	0.169427
NUP155	3.26692	2.42214	4.44045	4.13674	3.10392	3.55464	3.5288	3.74208	3.35388	2.68036	2.60879	5.34773	2.30192	2.08728	3.50012	2.57126	4.25139	3.75642	2.7843	3.62213	4.13232	3.68444	1.24799	1.38721	2.25876	1.21249	3.0472	3.77674	1.83935	2.74553	4.35808	1.73411	2.73311	2.90145	2.91665	2.6765	2.76198	4.01387	2.60544	3.09674	4.12364	1.88182	1.63396	4.13942	4.46959	9.47418	1.64069	3.85283	5.0805
SDC1	340.042	137.265	351.021	271.79	152.517	327.943	398.66	418.697	302.388	189.684	76.5807	558.364	167.9	356.632	353.592	69.9915	370.956	467.564	415.273	468.458	329.491	242.519	160.051	320.397	50.0678	135.638	285.024	406.861	1.3049	302.035	475.277	5.92128	372.957	453.782	308.608	379.047	23.7165	310.968	487.576	32.2902	373.123	292.228	14.4198	246.972	397.41	422.279	286.937	240.249	341.328
HK3	0.17397	0.188469	0.423384	0.35905	0.144338	0.128259	0.139053	0.026167	0.0905485	0.212281	0.51663	0.228448	0.262656	0.0103311	0.498528	1.44561	1.45266	0.210998	0.0484327	0.12316	0.2061	0.0850406	0.287728	2.8036	2.42066	0.0951299	0.0986394	0.192375	0.418164	0.161557	0.0551276	0.27243	1.48712	0.508653	0.230866	0.530766	0.822864	0.766982	0.369876	1.75646	0.0892942	0.417553	0.0371131	0.144801	1.14302	1.32641	1.57168	2.47158	1.34427
AGL	22.8293	33.1794	3.98212	8.52913	10.0433	5.15145	4.37841	5.79952	4.14195	20.4752	5.8553	6.946	4.54722	3.59478	4.41512	29.0023	5.84998	6.87503	3.21811	3.78682	6.87492	5.71947	2.67051	1.13228	21.8398	27.415	3.91806	6.67349	60.7691	8.00369	4.05669	42.569	3.56523	3.73931	2.64989	2.00575	4.68406	5.0592	4.04906	5.67717	3.78978	33.1317	3.10298	5.9018	5.99751	5.08974	1.51025	4.71463	11.0399
KDELR3	1.40445	1.08219	2.12619	0.905807	0.855459	1.12616	2.84593	3.91248	1.69878	16.3554	9.25591	1.00654	17.8229	1.03078	1.08084	10.9159	4.36309	3.29312	1.11057	0.712685	2.36628	2.27799	0.693795	4.11899	15.0546	1.14822	5.16405	1.34367	5.93942	0.773638	1.20215	9.6202	2.03814	1.9255	17.4564	1.95598	12.7782	9.80304	1.85932	8.97897	1.60824	1.09251	21.444	1.37823	11.5567	6.99102	5.64413	6.29304	12.3538
ABCB6	0.821063	1.10789	1.07343	1.29078	1.49167	0.930807	1.05746	0.895904	1.45496	0.78174	0.82374	1.3397	1.31235	0.747698	1.12158	1.26853	1.04648	1.00656	1.04086	0.911926	1.039	1.44817	1.81241	1.37724	1.10118	1.04071	1.14938	1.05674	0.818942	1.35895	1.21958	0.853166	1.39039	1.05602	1.11877	1.22513	0.600385	1.10102	1.06068	0.381262	1.13109	0.81578	0.258045	1.43786	2.10135	3.10036	1.24398	0.935439	3.57955
TFF3	1.35577	2.68977	0.795054	0.463542	1.41283	0.762695	7.31954	65.8201	0.64435	315.664	30.2584	0.643488	1237.51	5.86372	2.18967	4.92504	1.41409	105.523	1.57646	0.495591	28.2906	33.9302	19.6468	1.88844	381.731	1.97878	167.178	8.01207	102.475	0.315048	8.61817	117.844	4.77482	22.5165	406.437	0.320368	15.7812	196.533	1.53537	11.0369	8.71273	2.67308	60.7607	2.21041	1.22052	0.467028	0.428426	1.47462	2.07453
VCAN	0.697233	0.957418	1.28149	0.925919	1.92914	0.488952	0.483904	0.312486	0.327729	2.71079	10.0502	1.2064	2.0712	0.0538566	0.976564	17.7711	12.5345	0.490141	0.769983	0.246863	0.820724	1.09638	1.59128	10.7435	10.6637	0.762952	0.839105	1.01099	4.67613	0.410764	0.517116	2.3734	7.59633	1.4054	0.89391	1.31618	2.48116	8.5696	1.94071	6.63139	0.11885	1.17152	0.595513	1.56878	4.08016	5.50989	0.941659	10.0957	3.18189
FKBP4	35.5866	20.4414	40.82	44.9771	34.1028	33.2031	27.889	28.3087	42.0886	22.8326	24.2934	66.2723	27.9864	28.7793	40.7168	15.4574	23.6018	29.5788	33.9536	39.5166	38.5329	32.3502	30.8652	34.51	18.492	20.3849	31.9348	35.7622	17.1153	59.7665	44.4896	16.2097	27.8324	37.8956	33.5518	29.1237	24.5991	21.3988	21.7883	16.2619	38.4066	22.1776	14.3657	35.7312	25.9737	42.1577	29.9263	25.74	257.151
GPD1	19.5424	28.3024	0.294727	3.70597	9.39392	1.38233	0.386872	1.69332	1.34359	9.95947	31.5003	0.183091	2.63435	0.344917	0.121896	21.0777	22.9023	1.60154	0.487981	0.326338	1.55396	0.651551	5.25907	4.76048	47.7756	26.277	2.49245	7.97459	54.5837	7.72443	0.642718	39.8934	1.34631	0.698851	58.5825	0.132824	4.66458	4.00308	0.44613	4.72573	0.259108	31.7144	11.2485	1.58644	0.104695	0.455599	0.0113984	0.170134	0.282933
MDH1	41.2009	70.9905	23.259	25.3842	29.4844	20.3359	23.45	27.9776	22.1425	36.9465	33.4517	20.3253	34.3461	32.7904	25.4817	46.3487	29.733	36.0649	19.6705	20.7731	26.2093	19.8451	15.1175	15.8275	44.8165	51.3057	25.7594	25.1318	71.1269	29.6487	22.8958	66.2791	16.5836	19.5765	40.4844	18.0627	25.6529	20.6996	22.2123	22.5951	28.3463	73.0203	17.8708	22.6049	21.8204	27.6935	19.573	13.5011	34.033
MDH2	118.287	128.299	69.024	69.0036	83.5623	60.4496	58.3477	80.4779	65.0163	72.1229	69.2879	80.718	51.7447	75.9973	80.7255	107.634	63.1264	70.1943	64.1137	66.9032	75.5736	54.409	80.0949	83.3725	112.464	116.27	64.2591	61.2585	169.878	76.3655	77.6089	174.186	67.7956	84.6593	90.8844	64.7372	59.763	50.0619	67.0161	50.7841	96.0067	140.634	41.3155	65.9276	40.6788	72.2415	32.8803	47.1088	73.7788
GOT1	92.2768	133.102	25.5269	37.7473	38.554	31.3538	29.1353	33.4082	27.4903	59.4404	35.8245	25.6664	30.7772	32.4959	32.5644	83.8375	24.0656	31.8313	21.4445	29.8082	44.3613	35.618	19.4991	15.4276	74.9268	86.3489	27.4336	30.2569	158.441	53.6969	31.9866	159.912	23.9145	29.6131	32.3505	18.0547	26.4043	18.5121	20.3819	18.4431	44.9587	125.601	20.3392	26.7349	18.6875	23.5476	20.6374	16.4723	37.5289
NUP62	9.15272	5.91224	11.4458	11.381	8.53113	8.38801	7.41891	10.99	12.1136	8.70356	9.12659	11.2087	8.74596	4.1075	11.8816	6.93384	11.5407	10.0605	8.2848	9.53132	12.9174	7.70403	4.09383	9.47631	7.48317	6.27475	13.0269	9.1643	5.9081	12.0044	8.46593	6.64912	7.53949	8.05251	9.99426	9.71733	10.5014	11.0094	8.41972	11.5983	10.8376	5.80867	3.81992	10.548	14.0042	15.0719	8.65992	9.90639	20.422
COPB2	16.2159	12.2744	19.3212	21.4287	15.1152	20.7508	19.6114	20.323	17.4816	15.2309	16.8165	17.8776	23.5438	16.4127	19.0944	10.7879	16.7456	24.6323	13.4784	13.2926	16.0791	17.9734	6.60668	8.8801	13.3426	7.0986	22.91	20.2222	8.4758	17.7255	21.3281	8.89847	16.3635	19.7334	13.3787	16.2681	19.272	23.7952	16.4781	17.9124	20.1739	9.578	12.7041	16.157	21.0499	40.1835	9.73391	18.5783	23.1191
ANG	1.12071	1.79226	1.28795	0.705598	1.95096	1.72679	0.849784	3.61215	0.975838	7.18788	5.94305	0.700787	21.5675	2.13918	1.0206	2.92644	3.82133	6.97939	0.829527	0.647665	1.90826	2.00256	5.82081	2.10334	7.45374	2.00346	12.5705	2.11815	3.1701	2.27305	1.8753	6.08261	1.8329	1.47471	16.1599	1.72267	11.9783	6.04852	1.89901	7.36057	1.06007	0.447582	7.77962	1.67647	1.1344	0.974843	1.8769	1.08863	0.37837
COG2	2.29196	1.86129	2.11964	1.8922	1.5727	1.62315	1.44166	2.14607	2.10289	1.95995	3.3599	1.91254	3.26735	1.51488	1.63802	1.90082	2.60397	3.19123	2.21755	1.42755	2.60518	2.10651	1.07136	1.34513	2.87563	1.50993	2.14909	1.93568	2.01245	1.61668	1.28389	2.0523	1.58021	1.3185	2.44938	1.73901	3.33064	2.20552	1.58683	3.33103	1.92629	1.77116	1.89649	2.05408	1.96621	3.01165	0.694551	1.77754	3.3745
PRKAG3	4.2003	2.61615	0.0417797	0.177156	1.47062	0.0609391	0.0171522	0	0.898238	1.49368	0.0137787	0.00626203	0	0.00509737	0.00416906	8.54724	0.363642	0.404641	0.244278	0.164939	0.223222	0.143155	0.518907	3.46576	4.40947	8.00099	0.0211603	0.239556	7.13673	1.33058	0	3.12215	0.607087	0.00408081	0.131169	0.00467644	0.00501237	0.00455939	0	0.0285706	0.00704926	4.22343	0	0.589999	0.00737215	0.663545	0	0.139085	0.028224
SOX9	8.7127	1.43395	14.9657	3.63363	1.03181	11.7601	9.77675	11.5698	17.3208	20.6268	39.6964	1.25743	11.456	0.833535	1.7273	5.29378	52.5381	28.1761	9.87151	33.8925	37.1701	22.5349	6.08049	4.36961	25.3649	3.49962	8.30089	11.4275	2.87721	5.86538	1.1457	16.0995	8.92553	3.72377	42.8864	1.43035	61.2434	14.0653	12.4513	42.6608	4.61384	37.6484	23.686	5.79557	20.6999	13.05	10.0616	7.30624	5.96637
NANP	1.4824	1.39217	2.32312	1.59554	1.13507	1.88457	1.55803	2.05595	2.00934	1.3214	2.15553	2.10672	1.94121	2.34941	2.80868	1.18306	1.37853	1.9759	1.38459	1.76327	2.11943	1.3618	0.806997	1.14448	1.72496	0.728815	1.5982	1.9388	1.1436	1.84112	2.25503	1.06888	1.3665	1.59599	1.46902	1.0777	1.45443	1.71414	1.7482	1.9264	2.00101	1.20901	0.807716	1.49257	1.33931	1.91508	0.749768	1.75053	2.34416
AC016586.1	0.19525	0.36261	0.0226273	0.251855	0.138851	0.091395	0.125407	0.0839079	0.0458456	0.0221969	0	0.21366	0.0902399	0.0248459	0.0203211	0.116536	0.205506	0.0382977	0.0258843	0.148098	0.0241787	0.264673	0.095445	0.0366444	0.0588042	0.105593	0.082513	0.286407	0.0329728	0.11955	0.0568201	0.0595623	0.14902	0.0795639	0	0.0227942	0.0977266	0.0888949	0.0374543	0.0232101	0.27488	0.114114	0.0396693	0.0898692	0.287471	0.221527	0.0443382	0.0484242	0.4815
NASP	5.37853	6.47891	8.07214	8.17958	6.84802	6.54201	5.98436	6.77326	9.39921	4.46119	9.17953	5.79515	9.13523	3.40547	10.1519	6.42177	8.91445	7.19874	5.42615	8.78139	11.7046	9.26349	9.45382	9.93052	5.41767	6.30002	7.74981	6.4858	3.61767	7.59724	7.27938	2.87255	8.19426	4.72684	7.58074	6.42688	6.77385	7.37169	6.24426	7.93213	10.2652	3.4628	2.34447	7.09532	9.809	16.1195	15.2678	5.56424	14.2128
NUP214	4.0547	4.23756	5.33556	5.34702	4.19721	4.4976	8.83262	5.72085	4.88189	3.53937	4.85571	6.52126	3.95522	2.84675	6.05276	5.35797	5.58788	5.36868	3.50247	3.7491	6.39905	6.49898	2.66895	2.72868	3.11935	2.4477	6.38189	6.45255	3.29789	4.53718	5.60569	3.42312	4.46806	5.26739	4.35593	3.44841	5.99133	5.50342	4.85328	5.1096	5.65604	2.43089	2.70154	5.58727	5.37977	11.1561	4.41839	5.47345	5.98654
ZBTB7A	20.1918	10.2351	16.2746	20.5046	15.789	19.5541	20.2821	23.5737	16.0818	12.5811	11.191	24.5134	10.246	9.13702	18.5223	10.9089	13.8387	18.8997	9.43227	20.3381	18.8406	17.0472	11.6714	9.76759	6.77627	9.4072	20.3697	21.6262	6.98466	20.4217	25.3239	5.38346	11.6109	23.5273	8.80461	16.8031	10.5259	15.4612	18.4343	8.63807	21.6303	9.42374	3.91248	16.4924	13.412	17.1904	13.4871	17.481	18.676
B4GALT2	13.8437	9.16726	20.7619	13.5315	10.9874	9.49646	11.757	15.1509	21.112	13.3271	12.3492	20.9662	14.2801	6.57347	13.7486	13.1759	16.0848	16.6639	14.8792	16.3128	17.1521	10.1662	15.1701	31.5502	12.5987	11.6866	15.6172	10.7707	12.7296	13.5005	15.7404	8.88366	11.0368	12.0328	16.8658	17.9886	11.7227	13.045	10.5851	11.0103	15.2434	12.7965	8.67174	12.1246	18.3493	24.1387	28.7837	15.2264	18.4543
PPP2R1A	41.1051	36.8714	43.0244	39.2163	39.4067	41.5437	44.7538	44.3084	43.5336	34.8056	39.6562	40.6492	31.9977	42.899	47.7582	34.5712	36.2827	40.1969	40.1638	48.5236	41.1221	40.5084	51.6253	59.3438	36.6363	38.5358	44.3876	38.1041	32.5974	43.132	45.1308	37.3579	43.9797	50.5232	44.687	45.4341	39.0536	34.0791	49.0122	36.9046	47.9746	35.4344	16.5477	41.4143	42.0354	60.6179	50.4559	35.6073	32.3405
HKDC1	0.0179185	0.0679416	0.0617773	0.0577832	0.133798	0.0403649	0.0671348	0.0134757	0.0368143	0.0606024	0.04674	0.039216	0.106279	0.0399028	0.0456903	0.0155965	0.0536323	0.095335	0.0290993	0.00339781	0.0349482	0.0656923	0.0766429	0.0529661	0.0424981	0.0395695	0.208714	0.109686	0.0158864	0.1104	0.225092	0.0191316	0.0444465	0.0415287	0.0432339	0.120806	0.00392375	0.139197	0.219555	0.0223654	0.0303504	0.0439844	0.0159273	0.0685572	0.196214	0.138752	0.0391642	0.0388849	11.2072
PRKAA2	6.52071	7.49724	0.203515	0.855057	3.36203	0.442759	0.369865	0.582888	0.33524	5.94549	2.11504	1.26105	2.30734	0.895697	0.185745	10.4829	0.385077	1.53606	0.280128	0.196477	0.454386	0.758321	0.39782	0.953929	9.08802	6.02523	1.89759	1.24209	19.648	2.25324	0.736802	11.7836	1.40414	0.205085	0.792319	0.0050004	2.15456	0.721537	1.01473	2.10115	0.232409	9.46761	1.6984	0.803375	0.0262762	1.51784	0	0.21954	0.00754481
ADORA2B	6.6338	1.61234	6.03065	3.78168	3.67183	5.54443	4.01823	9.20178	6.63185	4.53516	2.10092	9.18255	10.6301	4.78327	12.1615	1.69774	4.93855	13.2005	5.76743	14.2387	11.5658	4.83865	1.82981	3.00659	2.01031	2.82183	7.52223	6.48617	0.0972511	9.03151	5.96711	0.199631	3.96712	4.43736	4.62859	3.9299	0.740247	3.38463	3.94675	2.21551	8.17649	3.7084	0.43078	4.14462	8.63291	13.7328	4.70187	3.29793	12.7721
TIGAR	4.18432	1.64092	3.97806	4.38793	3.46768	4.61153	3.70296	2.32097	3.09642	4.038	4.19416	3.03185	2.27322	3.26625	3.91286	2.66756	5.81236	4.59268	6.77035	6.0987	5.13162	4.13216	0.831442	3.7394	4.71009	2.87501	2.10502	3.07569	2.59629	5.20714	2.51129	2.04849	2.76006	2.54286	2.36029	4.90482	1.86295	4.70663	1.69916	3.77594	3.16032	3.558	0.740502	4.22953	5.68327	5.17278	3.9577	4.16355	19.0346
ZNF292	2.31072	2.13332	1.99947	2.2964	1.80591	2.7119	2.52756	2.65696	1.45828	1.96954	3.43627	2.72102	2.47937	1.72949	1.60511	2.25061	3.96306	2.46931	1.08565	1.34152	2.62158	3.45755	0.790693	0.435311	1.96392	1.12784	2.51069	3.52171	1.38124	1.25823	3.91669	1.85735	1.56838	1.91832	1.28513	1.03918	2.89723	2.44087	2.4081	3.36549	1.79561	1.04167	1.53361	2.39505	3.42994	2.72855	0.614494	2.33505	3.80968
NDUFV3	7.07822	9.22848	5.9786	6.22519	7.30644	5.77604	5.16427	5.44759	7.22058	7.01825	6.3423	5.43904	6.41399	5.10776	6.65956	8.09249	7.2	5.81092	6.45131	5.66991	6.43024	5.53783	6.58503	7.88088	8.75123	8.50695	6.04861	4.43651	12.32	5.9219	5.42496	11.0472	5.57898	5.81313	8.34693	5.76962	7.11643	5.93187	2.84451	5.47457	6.43394	2.58089	4.71901	6.75498	3.40887	4.37021	10.1426	2.45871	5.32782
PRKACA	20.0041	25.9773	11.1367	11.9084	16.8435	10.5233	8.98177	12.0153	12.4306	17.036	23.1361	11.2373	7.96667	5.76445	10.7188	29.9304	15.3515	11.3348	9.16651	9.85242	16.1695	12.1398	5.25973	10.1907	25.07	29.8981	12.5963	11.1672	35.8124	19.0789	11.9134	36.1421	11.1082	11.1851	13.6624	8.20164	16.956	11.5764	10.8308	15.8602	12.6061	28.9958	8.21433	13.079	13.2175	15.33	14.2011	12.1647	15.0399
HDLBP	53.3913	48.4534	46.5544	48.7127	47.3069	40.8623	45.62	60.1679	41.3834	61.5371	63.7901	52.8607	58.3023	24.1834	40.3057	57.2626	48.0794	56.879	40.8249	39.4331	47.8662	47.8159	27.8351	39.0271	49.6436	31.5495	70.3737	52.1826	63.9816	45.5364	57.1818	67.9986	41.389	46.2453	55.1723	39.1099	90.433	52.0868	47.1472	70.9586	45.8363	46.8964	101.533	52.3637	50.4286	65.2717	33.0484	50.1455	49.1447
STAT3	45.8218	18.0277	35.6172	79.3649	22.6483	31.0496	23.7256	30.4339	29.362	30.0535	42.2456	50.2371	41.9456	13.3959	39.4196	35.2133	58.762	42.9707	29.8764	25.4873	42.3385	35.7658	10.5795	28.8734	32.96	19.4689	42.3676	36.9467	38.414	71.9406	39.2457	20.4096	27.4719	54.5931	26.3991	28.8647	34.5072	70.516	25.7539	44.442	34.0172	28.5908	10.1197	21.9475	38.0507	26.5512	13.3654	35.3267	46.3073
CTH	0.79824	0.530847	0.333391	0.224282	0.422939	0.304284	1.64639	0.719196	0.175368	0.930835	0.627987	1.1762	1.70461	0.295681	0.495182	0.533825	1.04813	0.499171	0.425385	0.413636	0.486419	0.415878	0.270441	0.436089	1.37461	0.219409	0.946882	0.468188	0.523194	0.406491	0.515194	0.658196	0.512723	0.276167	2.02134	0.316475	0.851484	0.686376	0.249395	0.782607	0.399168	0.388006	1.0341	0.51565	0.23418	4.70768	0.433427	0.377324	0.730884
GFPT1	7.16152	4.86297	5.88637	9.4348	4.38397	8.67097	9.12671	11.1083	4.71826	12.1191	14.6806	7.96156	16.567	4.98951	7.72428	6.16754	5.30928	11.489	4.20355	4.27968	9.18875	8.00618	1.47269	3.04475	8.35653	3.18251	18.4925	10.1981	7.02346	7.65983	12.2492	7.45564	5.78775	7.95057	9.38993	4.88875	14.5587	14.2546	5.53638	12.3697	7.31628	4.63957	13.3374	4.7961	7.05259	26.6851	3.34025	5.08638	9.26289
BIK	4.7847	0.975966	4.59602	3.97683	1.35784	2.73869	4.66545	11.9544	2.23753	3.21815	6.18615	5.10439	27.9799	7.86425	4.66724	0.362447	3.15278	35.7475	1.28188	4.91992	20.9982	2.24504	9.11104	6.81193	6.68961	1.91995	46.4599	8.39649	0.425983	10.3181	7.91165	2.11612	3.10173	4.81115	9.34673	2.47038	16.5534	5.04042	8.57543	25.4212	7.76831	3.09595	2.81873	2.43496	9.80055	38.0481	7.84438	3.16277	18.3903
GOT2	91.893	88.5092	49.8627	67.5105	48.8868	34.963	34.9627	47.8224	42.2664	50.7608	36.8953	45.8853	29.0319	28.1679	53.0113	70.4223	27.0933	68.1705	34.0087	49.9577	56.7377	34.4365	17.9593	30.4624	42.5183	58.7304	37.2488	45.8124	120.223	61.6116	48.0772	101.511	28.0903	41.9615	29.3972	27.4441	33.2672	38.2568	38.4962	26.5537	50.9766	121.193	18.9382	37.5948	44.7782	45.6102	38.2072	31.2488	26.0046
XYLT2	2.31511	3.51657	4.5	3.24264	3.51468	1.97071	3.63941	4.70671	3.2579	3.30456	8.68617	3.43	8.03135	2.01563	2.74081	3.45723	6.07206	3.76275	2.01574	1.90411	6.08397	2.9866	4.01466	4.75919	5.29605	2.21745	10.1465	4.18319	2.05668	2.59275	3.8614	2.83293	3.007	2.66042	7.36095	2.9604	7.641	5.04201	4.51324	5.81704	3.59062	1.11832	3.71404	5.60559	16.9069	10.6139	4.92709	3.92841	10.1072
PGAM2	0	0	0	0	0	0	0	0	0	0	0	0	0	0	0	0	0	0	0	0	0	0	0	0	0	0	0	0	0	0	0	0	0	0	0	0	0	0	0	0	0	0	0	0	0	0	0	0	0
MET	3.51543	2.88347	4.72733	5.31775	1.77259	1.34993	6.26977	5.66062	2.71975	5.47646	13.9335	6.20485	14.1179	0.861923	3.60573	4.36168	5.66638	24.5433	2.97805	7.4258	17.6942	2.42227	1.18716	5.03503	7.70842	2.93116	13.9574	10.1968	5.08165	3.73488	2.90976	7.58497	3.16299	3.09451	12.8473	3.20507	11.3838	9.94685	3.42663	14.0579	4.32549	7.4184	3.82009	2.27272	11.1388	14.4507	5.53854	7.13122	54.2549
GYS2	0.304577	2.64629	2.32749	0.314302	1.83839	3.33828	2.72051	0.050393	1.4668	0.702902	0.16623	0.386622	0.183937	3.77116	1.1228	0.106043	0.0168302	0.058547	1.90502	0.51287	0.475237	1.04569	2.65765	0.0240084	0.0642114	0.722563	0.220746	2.8195	0.0432058	0.182761	0.430178	0.0520315	0.939142	1.69851	0.00734886	0.0398244	0.0106713	0.135897	0.948843	0.0202755	0.911724	0.194387	0.0043317	1.93813	0.0156952	0.0290277	0.179137	2.12566	0.172755
CHST6	0.277091	0.0146431	0.0694448	0.177258	0.0140179	0.19192	0.42202	2.8361	0.0647977	0.869476	2.94719	0.778997	15.5312	0.0521738	0.111604	0.0925517	0.18465	4.23448	0.19233	0.116194	6.4208	0.260403	0.177299	0.591918	1.32981	0.0255847	19.2645	1.53559	0.229023	0.108624	0.388542	0.303065	0.127233	0.364675	0.712051	0.0276147	1.30627	4.9988	0.299475	1.97767	1.19884	0.13456	0.671216	0.0653247	0.17123	0.186073	0.0501338	0.146662	4.40272
ADPGK	4.20433	3.12942	4.62667	5.24479	3.25269	3.30173	3.97242	4.04248	5.10215	2.55476	5.08101	5.13932	7.12188	4.38404	4.7293	3.85494	6.33389	4.75902	3.46275	3.9039	5.88083	4.18731	2.76284	5.23186	5.66608	2.44365	5.46927	4.20246	1.93554	3.98798	3.79628	1.84092	3.94293	3.21153	5.54169	3.80646	5.35346	4.91579	2.81413	7.17901	4.15876	2.85053	2.47731	3.05746	7.61274	11.3381	3.76344	3.85057	8.9006
PFKM	49.4622	114.059	4.52582	10.021	32.0118	5.99695	4.40235	3.95739	7.78794	34.432	13.1222	3.9038	5.23971	2.08116	4.07791	62.8434	6.94484	6.91033	5.54917	6.27008	8.84583	7.85386	4.39173	5.5298	53.472	113.818	4.64706	7.73745	162.243	27.6336	4.02309	174.006	8.17826	3.05954	8.45902	3.49326	9.05078	3.73556	4.159	7.43876	3.96866	80.5979	5.55043	11.3506	8.60121	12.9349	2.89784	4.45403	5.5679
NDC1	6.51686	3.10736	7.15832	7.72084	4.50365	6.08707	5.34826	8.03614	5.32207	3.77867	4.86071	9.3065	5.09259	4.75584	7.88774	3.10718	6.823	6.97869	5.36144	6.6875	7.60083	6.09277	2.67622	2.72857	3.23108	2.20357	4.23704	6.27427	1.92374	4.20408	8.00257	2.00331	4.81786	5.30175	5.9525	4.59387	3.78484	6.24914	4.5101	5.00851	7.75551	2.66007	1.74375	5.69814	6.65804	10.3544	4.25528	6.34062	13.3818
HIF1A	27.9014	18.827	34.4034	47.1558	24.8015	30.8141	29.8916	26.6324	27.9005	27.8187	54.4968	62.2478	26.7379	18.4661	41.1322	22.4358	63.1708	39.6418	48.598	36.7471	41.1064	42.0249	6.61589	40.5824	27.2051	8.95049	24.3654	23.5769	18.1312	48.2007	34.5793	9.65722	41.0635	38.9885	16.6268	37.6296	23.5275	70.8082	26.1186	53.8314	26.1372	30.7185	14.3491	29.166	85.8419	48.5755	9.23186	51.114	100.666
IGFBP3	15.3682	7.8271	9.53814	25.2775	4.29577	6.43126	72.3232	43.1797	6.57902	8.4732	31.1916	1.99139	170.4	5.29432	6.56819	21.391	22.6025	160.065	9.935	5.09074	36.2532	14.0023	7.02689	25.7008	24.4183	3.80273	116.326	49.1577	8.12633	21.3734	13.8137	16.4086	10.9489	5.67017	18.6761	29.3099	3.90087	39.5473	5.78397	20.1095	10.1804	12.8274	1.85502	10.4524	15.1258	29.4165	14.0457	23.2457	23.2674
GPC1	37.1004	28.786	31.6477	38.3424	30.8656	26.1987	26.1113	41.8182	31.972	28.9393	23.6459	45.4175	19.1096	13.4241	31.6197	29.6223	32.2994	57.923	44.3816	59.2331	41.5944	33.6987	22.6381	31.4117	28.2314	29.6986	28.7326	34.5098	25.4678	26.0904	43.897	22.2804	24.0343	31.5748	36.4359	19.3909	17.1626	17.5946	31.2037	13.2322	47.5834	36.9546	8.20968	37.3649	131.747	133.751	45.5352	31.066	89.8712
ECD	6.36992	4.79301	8.03866	7.51579	6.62013	8.2869	7.44869	7.26168	7.61634	6.29626	8.35618	5.99658	7.52787	5.52659	7.66044	5.46969	10.2556	10.2843	6.18492	7.96763	8.6033	7.96334	2.9216	4.00411	5.62912	5.0475	6.5057	7.31604	4.50824	7.8235	7.94094	4.30942	6.13338	6.19569	9.5013	6.46569	7.59643	7.76749	6.38905	7.36304	8.03806	6.91414	4.5223	6.89397	8.54623	8.70434	5.74961	5.83029	10.432
NUP133	7.07294	6.38421	8.4131	8.84417	5.95543	7.49553	6.1465	7.74522	6.32068	5.5162	7.8377	8.41629	8.0133	5.28287	7.01154	6.57481	9.40382	7.63895	6.62184	5.76708	8.44049	7.89328	3.46823	4.40694	6.38062	4.36759	6.59536	7.44548	5.72738	5.72945	7.97541	5.44772	5.7934	6.10678	6.57564	5.11075	6.95111	8.08054	6.03389	7.83604	7.98032	4.16716	3.45867	8.22977	7.46256	11.9799	2.12491	6.44193	8.23365
MIOX	0.0106229	0.0230165	0	0.0137026	0.00661013	0.00870186	0	0.015978	0.00873006	0	0.0255781	0.0116245	0.0229117	0	0.0154784	0.0221911	0	0	0	0	0	0.00916362	0.0545248	0.0418676	0.0111977	0	0.0157124	0.00839054	0.0125576	0	0.0360662	0.011342	0.00810765	0.00757541	0.025631	0	0.0651329	0.0169276	0	0.0088395	0.00654294	0.0347679	0	0.00855659	0.0957969	0.219356	0.0337721	0.0184422	4.97739
EXT1	6.39395	2.19226	7.07575	6.68383	3.39683	3.84284	7.08207	6.12192	11.1666	3.83716	7.20848	9.28897	7.03371	1.83521	6.76365	7.39018	12.8367	12.1318	5.75061	5.46171	11.0553	3.91826	2.87408	5.31403	4.81215	2.17472	5.98455	5.10821	3.21843	6.11943	3.02672	3.0268	7.01393	5.40622	9.4693	7.36206	5.69086	7.16502	5.21145	6.48569	7.11137	4.23976	1.90833	4.12019	21.4876	10.7733	6.81956	8.62569	15.3497
B4GALT7	2.81515	2.50442	3.9423	3.3316	2.07943	2.32192	2.73915	3.41015	4.65571	2.90588	4.99754	4.81367	6.32233	2.48003	3.00449	2.92558	3.55909	3.0651	2.58727	2.76384	4.57848	2.10441	6.49929	9.50802	5.72676	2.38455	4.70801	3.1717	2.32538	3.17414	3.42609	2.45172	2.74558	3.03202	5.49839	2.59801	6.48167	3.29196	3.1614	4.88807	3.35576	1.76481	3.27401	3.16585	5.74684	4.98213	4.17332	2.99155	6.16408
PSMC4	33.7215	20.6342	39.4869	37.9819	33.3226	31.1851	26.3647	32.9403	41.2507	25.3278	25.6153	36.4462	31.3663	33.2132	34.7345	20.2477	35.5685	38.1247	38.2949	40.6068	33.1111	30.0406	21.5381	46.3178	28.0139	28.5836	38.2742	30.505	21.5897	38.1628	35.6194	20.6093	29.8181	33.3495	36.2268	38.3347	23.1871	35.1273	23.4132	25.6526	40.4274	31.0712	11.0434	33.1302	41.9908	59.6005	51.1893	27.877	51.9771
PPP2R5D	12.3718	13.1098	12.1285	13.0401	14.5585	11.4078	11.6304	13.7941	11.2744	10.5326	12.6235	10.7853	13.2239	9.03576	10.8379	15.8427	17.3746	11.9161	9.85145	9.39278	13.4841	12.0032	7.57449	9.43899	14	9.59666	17.7159	14.3055	14.1486	14.003	13.815	13.5843	11.8503	13.5808	14.3767	11.6064	14.8505	14.302	15.8397	13.7727	12.1553	9.39756	8.28997	14.5608	23.9557	21.485	9.03689	14.5871	17.2993
TKTL1	0.162038	0.237833	0.0212014	0.0134849	0.0715561	0.0171272	0.180173	0.00786205	2.65902	0.103991	0.046148	0	0.0056369	0	0.0190406	0.109192	0.0818364	0.0287075	0	0	0.00453103	0.018036	0.169918	0.0961388	0.115707	0.250646	0	0.00412861	0.339846	0.0448068	0.00354931	0.195332	0.0159576	0.0111825	0.0378355	0.0170863	0.00457842	0.012494	0	0.0347961	0.0128779	0.128308	0	0.0210516	0	0.0830271	0	0.0136118	0.00644513
P4HA1	6.60014	7.73159	4.53353	3.28609	4.62513	4.5678	8.52328	3.19159	2.25075	9.59164	7.3816	4.34697	24.3797	4.1264	3.10079	14.492	10.2823	7.453	2.31256	2.56861	5.47532	5.15605	3.9998	7.69852	12.445	7.34787	16.6689	6.9671	14.1752	7.09197	6.89843	10.7351	4.24647	2.9032	6.6676	3.93688	5.40292	6.75765	5.6613	8.14575	2.0364	6.50576	2.52652	4.55116	17.4666	35.7378	5.81446	6.68761	21.821
HTR2A	0.0441009	0.0808523	0.0192637	0.0131276	0.0548839	0.00555781	0.00508406	0.00765376	0.00278791	0.0593917	0.340343	0.0259857	0.0219502	0.00906541	0.0370723	0.467718	0.168709	0.00465782	0.0314808	0	0.0147033	0.00292636	0.133494	0.035654	0.0822464	0.0898967	0.00501768	0.0133974	0.0721838	0.0436197	0.0184281	0.0615746	0.0569612	0.0362876	0.0327406	0.0083168	0.0534855	0.0675721	0.0387197	0.135497	0.00626838	0.0610664	0.0313602	0.0218601	0.0437033	0.0134712	0.00539249	0.123678	0.0878412
NUP205	8.09074	5.40118	10.8496	12.8137	6.8451	8.45324	9.00114	9.94905	8.89016	6.40068	7.03835	14.5423	5.76545	4.78231	9.22203	4.90497	9.2593	10.6343	8.27496	9.39236	10.0176	10.0294	2.21499	2.57589	4.25238	3.39688	6.82985	8.9835	3.05784	7.85902	10.9792	3.04525	8.09388	8.92683	5.67335	6.26596	7.96849	10.7259	7.47143	7.79514	9.59029	5.22477	5.15503	8.52189	8.76176	5.92057	3.39138	9.74232	14.2525
PGM2	37.39	18.0294	36.7956	53.3723	22.5994	49.3919	34.0118	37.3116	28.2386	16.1213	7.34218	49.4096	21.5968	57.2513	42.4945	9.0241	24.2072	38.4553	43.894	32.3298	26.7898	41.6512	6.97965	9.77146	6.36885	10.5231	16.5667	40.2936	2.66086	40.958	57.9127	1.88084	27.4951	49.0258	6.38798	34.4615	4.80042	42.3076	28.79	8.58507	40.9798	13.8449	2.02551	28.0219	33.5104	11.4666	7.25024	29.0892	11.7878
ARTN	0.0646006	0.412132	0.22709	0.120364	0.0759295	0.0999569	1.55442	0.852906	0.560393	0.102817	0.207396	0.274912	0.835992	0.0447563	0.360826	0.0449834	0.138821	1.21221	0.133219	0.451887	0.410656	0.0371509	0.380703	3.03644	0.181589	0.217383	2.35162	0.164414	0.169702	0.253808	0.96017	0.0306551	0.0657397	0.163797	0.285759	0.410604	0.163466	0.440361	0.332523	0.137375	0.185684	0.29953	0.428751	0.208139	4.753	11.6123	7.05128	0.616835	9.63823
AC074143.1	0	0	0	0	0	0	0	0	0.00780448	0	0	0	0	0	0	0	0	0	0	0	0	0	0	0	0	0	0	0	0	0	0	0	0	0	0	0	0	0	0	0	0	0	0	0	0	0	0	0	0
HK2	31.6039	20.8494	21.9701	24.5977	20.1648	21.2135	16.7671	25.4076	16.2972	17.5938	11.3507	33.4682	21.0531	12.1406	13.1937	43.4964	20.6074	53.5122	13.5735	22.3942	14.4164	19.6604	9.24791	10.1144	21.7958	12.0257	26.3208	31.8908	36.0208	37.2824	75.7495	13.578	20.346	27.2019	6.29693	23.4511	2.63456	30.7856	19.7295	5.80156	12.7995	28.2173	2.32901	13.695	26.123	31.9066	13.3332	16.8588	33.3512
JMJD8	10.0296	6.95516	10.6519	13.3869	11.1578	9.28075	13.8773	13.9004	14.8436	10.1256	19.8127	11.7938	15.8285	9.56149	14.3176	10.5694	15.4371	10.6747	10.8507	10.3232	11.5207	11.0262	24.0312	18.2428	12.0574	8.57799	16.7576	13.4804	7.02272	9.87526	14.7007	8.38231	14.4172	16.4643	19.5909	16.3094	23.2062	11.5903	14.6623	18.837	16.6985	5.63938	12.8594	12.1268	12.977	17.1597	13.0684	12.6399	25.9246
AURKA	3.70758	2.5483	4.48242	3.47127	4.02214	1.96424	4.67757	3.78308	4.10722	1.06818	0.794923	4.79871	1.6724	2.9195	4.8231	1.80583	2.49039	2.75108	2.04984	2.69853	4.04419	2.52376	0.791529	1.27549	1.29815	1.97338	1.59023	3.54605	1.24013	3.03714	5.60586	1.22445	2.3324	4.82324	1.60362	5.06928	0.867523	6.03265	3.77544	1.83265	7.21201	1.23159	0.338246	4.27229	8.00824	13.9467	8.72119	4.83597	7.74516
AK3	26.2072	23.1677	13.8648	21.1789	19.8243	19.2472	18.0371	18.333	15.6057	22.9925	18.8241	16.4255	15.563	30.3348	18.4698	31.1368	24.2416	25.1087	17.3691	16.095	15.3688	16.2963	8.48275	9.35945	30.2899	23.1945	13.5149	19.5973	28.8319	19.6177	21.6793	28.4357	17.8939	16.9893	22.6624	27.0751	10.9482	14.5602	21.1956	17.1187	19.1142	26.9106	10.9764	16.3172	18.0489	7.53397	6.30495	14.5921	11.5236
CHST4	0.0357413	0	0.139172	0.0368825	0.00444803	0.0117112	0.262466	1.52138	0.0176237	0.130836	1.53758	0.0860449	3.15289	0.0191022	0.16665	0.318563	0.0131665	3.31248	0.026534	0.00542198	3.03005	0.0986608	0	0.0281732	0.459637	0	4.9006	0.417811	0	0.0153189	0.257255	0.122115	0.0272786	0.214098	0.905487	0	1.10824	0.785965	0.21117	1.43946	0.748479	0.298295	0.27449	0.0115156	0.0184179	0.0170316	0	0.01241	0.202723
GLCE	3.49057	4.3551	6.8211	7.10457	7.38451	7.22496	4.90562	6.26735	5.84127	4.49526	5.61236	3.82599	7.70543	8.52807	4.56612	3.16397	6.07689	7.19293	7.84834	2.76766	6.76746	9.65379	2.80634	1.2211	4.55607	3.30807	8.1232	6.8551	1.62262	4.55114	5.32463	3.16769	4.51555	4.96814	5.04075	2.30929	5.32088	4.76207	5.47731	8.18211	5.06202	1.55402	2.78705	6.92355	5.69426	5.40506	1.4752	5.58531	6.73098
NUP88	7.93205	6.08273	9.38153	7.59122	8.95879	7.00244	5.81954	5.9545	8.7903	5.70999	6.644	8.02924	8.49571	7.98047	6.47197	5.46561	8.53314	11.9597	7.55816	8.79374	9.03762	7.70666	3.9585	6.00342	6.59477	6.85784	9.21369	7.19028	6.72683	7.23657	6.58516	5.8025	6.59854	4.90608	6.77804	9.26816	6.71733	7.05208	5.54089	6.72635	8.27284	7.24218	3.50576	6.88263	7.05234	14.2823	6.04943	5.46509	9.51831
EXT2	9.60794	6.65108	12.2124	11.6438	7.26996	9.24822	11.6053	9.74193	20.6297	8.60524	18.3892	14.9967	13.0976	7.93789	9.91066	11.1036	16.0716	12.3099	9.67971	10.7864	13.0153	9.25638	4.45233	12.1625	16.6032	4.89155	9.94033	10.3	7.90607	11.5017	9.86451	7.12537	10.567	10.6403	12.9844	9.65677	14.7543	14.7006	7.89015	17.5456	9.20793	6.83083	9.97626	10.437	53.7189	19.7532	7.21465	12.8735	16.8536
CD44	49.3501	29.097	66.485	89.3756	45.9491	51.9004	75.337	46.466	77.7116	41.2289	72.9186	99.7318	40.1367	26.7618	61.2761	39.6756	96.2627	100.821	64.5908	77.9911	69.6968	71.5427	26.0631	49.3096	31.1514	25.399	35.0365	65.2523	16.1419	78.264	52.9252	16.1107	59.7121	65.6434	44.509	55.3142	125.505	73.4114	63.5157	79.9628	62.2411	31.279	78.323	56.8161	173.378	69.2264	51.9654	74.2507	178.076
PRKACG	0.023715	0	0	0	0	0	0	0	0	0	0.00951693	0	0	0	0	0.00825674	0	0	0	0	0	0	0	0	0	0	0	0	0	0	0	0	0	0	0	0	0	0.0094475	0	0	0	0.00970217	0	0	0	0.0188346	0	0	0
HDAC4	2.72451	3.28245	2.22291	3.72241	2.93953	2.00033	1.41381	1.46939	2.08071	2.7928	1.53838	4.26985	1.54064	0.682683	1.90278	5.50365	2.50654	1.62351	2.20648	1.74179	2.12295	2.8587	0.969401	1.63686	2.36193	2.81129	1.51673	2.58259	7.45538	2.83066	3.62251	6.2263	2.13388	2.24925	1.01757	1.97223	0.80381	2.16053	1.72286	1.23153	2.04818	3.24991	0.554124	2.56357	1.92688	4.30838	0.593253	2.78496	2.88604
KIF20A	3.03679	3.10189	6.03753	4.68197	5.35101	2.77192	5.68532	6.91312	4.94382	0.70965	0.410093	6.07128	2.15728	3.16019	6.51084	2.23208	4.25729	4.37145	1.48509	2.95056	6.21751	3.78805	0.329886	0.544611	0.630057	1.10096	2.171	5.94705	0.159549	3.01637	6.22219	0.277917	3.52077	7.73426	1.5294	4.68367	0.553101	6.7671	5.82215	1.34771	8.01023	0.319473	0.0822652	5.87449	9.89856	7.96671	12.2367	5.00431	7.86931
RRAGD	16.6036	20.5465	10.1522	14.9784	11.9467	15.3327	3.57127	6.62814	11.2431	14.2457	23.6484	7.57801	9.21237	5.79331	3.93805	12.9524	4.29569	7.80652	9.92406	8.87905	7.14419	15.8316	15.6775	13.6986	15.119	16.77	11.3668	7.60898	23.5717	21.8417	11.7673	22.2098	8.20511	8.03396	12.307	1.59847	25.8873	7.08802	6.35418	22.0076	3.3942	18.1839	34.2891	13.2558	3.6054	2.38998	2.02402	10.576	11.0666
PFKP	29.6596	9.88136	28.3234	24.8592	15.3234	26.1995	23.2331	28.9101	15.0048	23.0817	25.2236	26.5849	47.0078	15.4062	20.2631	12.5104	13.7485	35.8456	23.1122	39.1855	32.8508	24.3839	12.7099	13.429	13.6652	15.7863	53.2791	29.6776	9.46721	25.3933	43.4244	11.5331	20.0866	23.1765	20.18	22.6937	17.3747	23.1693	29.6819	17.573	27.1738	20.0558	8.6827	20.2201	28.1161	38.0002	20.027	20.4205	40.8861
CENPA	1.41431	1.07357	2.38829	1.61336	1.93972	1.25312	1.98981	2.30093	2.87808	0.459385	0.19305	2.53732	0.570655	2.1254	2.55142	0.750343	1.51518	1.27477	1.15175	1.30628	1.95156	1.5354	0.609058	1.1123	0.334677	0.558476	0.498074	2.09741	0.0341201	1.22679	2.7504	0.0410899	1.71828	2.42881	1.00981	3.71894	0.134836	2.64466	1.60198	0.688509	3.69185	0.322765	0.034208	2.23191	3.54489	6.793	4.04518	2.00437	5.84855
CACNA1H	0.193396	0.842928	0.0747948	0.0609155	0.278464	0.0405266	0.0438125	0.0811782	0.0462022	0.481393	0.761666	0.0885896	0.118831	0.0100157	0.113045	0.580949	0.368646	0.111155	0.0876477	0.076757	0.101366	0.205626	0.280868	1.03698	0.476463	0.48525	0.475646	0.165188	1.79173	0.303611	0.0855114	1.36378	0.278045	0.105841	0.108518	0.0845352	0.565314	0.949616	0.154002	0.241392	0.030472	0.345925	0.52451	0.168457	0.512781	0.446501	0.119751	0.691021	1.28937
NUP54	7.79682	4.62529	7.86807	8.04577	5.54719	6.76391	6.95461	7.5874	8.15225	5.28515	6.79309	7.79184	8.4335	8.58935	8.41438	4.89933	8.59505	9.51542	6.22851	6.52311	9.09563	7.28084	3.47155	3.95532	7.22848	3.81694	6.49908	6.98936	3.83108	5.42533	6.70074	3.50538	6.10845	5.56342	6.7146	7.28128	7.13786	7.05788	5.74877	8.14892	7.70679	5.58407	3.64055	6.52235	7.67254	11.0491	3.01258	5.82614	6.45742
RANBP2	8.02572	8.57867	9.58666	12.587	8.87442	9.27905	9.11216	11.8115	7.72744	10.4398	12.7897	13.2441	10.0164	3.33206	9.1847	8.86176	12.2804	13.8995	8.12131	8.91896	11.6314	12.0564	2.55788	4.91638	7.52815	6.0687	9.38545	11.5771	9.3334	7.581	10.4729	9.10058	8.06188	7.42537	6.35567	6.16578	11.9364	12.406	6.41822	11.2003	8.62372	8.14675	5.58138	10.4483	8.64511	11.8071	2.72162	9.94984	9.56707
NUP160	4.80083	3.43677	5.93563	7.3204	3.79023	5.86982	5.55618	5.91096	4.47742	4.20462	4.6156	7.16694	4.97094	3.88799	5.35499	4.27862	6.34522	6.6665	4.87832	4.78044	7.19692	5.39448	1.08858	1.32397	4.58454	2.06335	5.05916	5.56844	2.99275	3.6686	6.19047	2.32064	4.44345	5.10997	3.81374	3.62329	4.09402	5.75533	3.8461	5.46469	5.78238	3.07083	2.10401	5.70373	5.62307	7.77588	1.88308	5.24872	6.58889
NUP37	5.35974	3.51583	5.98339	4.89801	3.6037	4.56056	5.29359	4.68414	5.52723	2.30436	3.26251	5.63193	5.91552	7.77703	5.91093	2.86094	4.39772	5.65621	4.12707	4.44249	5.71166	4.87797	3.32778	4.12721	4.51519	2.86117	3.79815	5.0404	2.05383	3.9048	5.01579	2.13503	4.33671	4.46891	4.12612	5.50515	3.84282	4.80147	4.33215	3.59159	6.79424	3.26342	2.05524	4.51523	6.67258	9.42472	5.56696	3.50002	7.7001
AC010618.1	0.0399973	0	0.0324466	0	0	0	0	0	0	0	0	0	0.0431335	0	0.0291397	0	0	0	0	0	0	0	0	0.0525467	0	0	0.0295801	0	0	0.0428577	0	0	0.0305269	0	0	0	0	0	0	0	0.0246355	0.065454	0.0853264	0	0	0.127065	0.0317897	0	0.0493181
GMPPB	4.76827	2.28086	4.66699	6.70183	4.23666	4.40668	4.30036	5.09063	3.58608	5.00384	4.75599	4.46847	7.56522	4.1138	5.76437	3.24541	3.38541	4.83348	2.87027	4.98831	4.96246	4.38421	3.92655	3.72514	3.68692	1.8176	8.06778	4.28256	2.12421	4.71811	6.17197	2.59841	4.96537	5.57375	4.97066	4.59504	6.09011	5.62541	4.09816	3.92066	6.42634	2.05149	3.86763	3.75187	2.78525	3.16444	3.0026	3.55442	2.58904
PRPS1	10.4264	9.2375	9.069	7.54487	9.08609	7.27961	6.52115	6.50706	9.78574	10.5013	14.3523	8.81804	17.5607	6.58169	8.83358	13.2851	10.0955	10.0531	9.24068	7.92746	8.90019	8.34442	3.02084	12.7742	17.5795	13.3364	12.0304	6.90681	18.3791	7.14612	5.90361	12.2133	7.81076	7.32187	10.842	9.69666	9.31578	12.3608	5.12937	12.3176	8.20001	11.6807	7.10477	7.91972	23.8888	18.4554	6.44456	9.10859	12.9799
ANKZF1	2.29793	4.35061	2.8708	3.39446	2.56682	2.67925	2.97422	2.33314	2.6495	1.67235	1.67917	3.58253	7.27966	2.04413	2.22839	2.11901	3.50037	2.20045	1.69265	1.95347	2.98386	3.0366	6.52417	4.61644	2.43541	1.94758	7.15747	4.57328	1.89082	4.16613	4.79963	1.79102	2.14648	2.47472	2.38855	4.02839	3.12431	3.41334	3.37243	2.17678	3.05541	1.04854	1.12189	3.03887	5.57129	5.46766	1.17711	2.68756	6.51264
ARPP19	22.0493	16.1089	18.8222	18.2235	16.9161	14.7745	14.6229	17.7647	17.5493	17.066	21.4825	22.4592	20.9733	16.2944	17.8222	17.1917	21.6554	27.167	20.0162	19.4694	22.7021	19.9531	4.70025	13.6865	19.8116	17.57	15.0542	20.3264	19.2505	15.7587	16.3862	16.2886	15.6729	13.8867	16.9871	17.976	15.136	21.9543	13.2149	22.7108	17.0958	20.937	8.54183	17.5005	22.4716	27.7178	14.8283	17.8468	29.8064
NUP98	9.99105	6.87569	10.5925	12.3211	8.33962	10.7593	9.53187	13.5269	8.94213	10.0492	11.3875	13.9156	9.77324	5.48872	11.1029	8.28759	10.5141	14.12	9.32162	10.135	13.6764	10.5942	2.5804	5.39506	7.51245	5.2331	14.6111	11.4333	8.26541	11.2876	10.33	6.62421	8.36634	8.70995	8.25857	6.13575	11.9535	11.4917	7.98436	12.7599	10.2764	8.52801	5.67605	8.80167	10.6926	8.16442	4.71061	9.58386	15.8534
IRS2	1.63874	3.86556	1.46821	0.949558	1.28667	0.910289	1.51782	2.43487	1.66271	2.27423	8.24344	0.802985	9.23308	0.304892	2.06667	2.43239	8.72493	6.39278	2.01241	4.84213	12.5083	2.92836	1.80098	3.27708	2.97291	3.41691	8.65169	2.47021	2.8462	2.44925	1.94532	3.74465	4.79354	1.05326	5.30022	0.523029	4.0125	1.51114	1.41977	7.02684	1.45409	2.23093	1.34535	2.33215	3.25884	3.12433	0.313037	1.29021	0.641741
PAXIP1	1.34143	1.10599	1.49747	1.79923	1.12649	1.38895	1.3773	1.7528	1.51703	0.980899	1.58002	1.62812	1.55116	0.65913	1.83925	0.975406	1.9187	1.69512	1.2742	1.46468	1.93115	1.59237	0.426518	0.592633	0.82588	0.734015	1.16471	1.6268	0.678263	1.12572	1.87547	0.549236	1.42095	1.16965	1.46077	1.17383	1.55623	1.44396	1.37087	1.60354	1.49524	0.802961	0.775211	1.44863	1.27953	1.05594	0.537797	1.0253	2.63717
GNPDA1	6.56027	5.48941	7.57637	5.85269	6.30605	5.03459	4.5874	5.50602	6.59072	3.97103	5.60552	7.3264	8.33688	5.38027	6.20062	6.15789	9.1824	7.42683	5.3995	3.37212	6.31301	3.90983	4.00508	5.38503	10.4998	4.11485	7.44135	6.66539	4.65758	5.82172	5.46523	6.0787	5.47751	4.9874	7.22284	7.51812	7.42956	7.03062	5.63664	10.5531	6.10548	4.23671	2.21605	6.72358	8.48869	8.50006	6.81045	7.88961	19.9019
OGDH	63.8826	85.2856	34.0554	54.4157	50.2034	33.9208	35.5433	41.5604	29.333	62.6424	51.2991	44.5122	20.5905	15.6768	33.4712	88.9157	34.096	39.7032	37.0204	38.978	47.2848	37.812	10.5508	20.7927	63.5987	76.6247	34.0177	39.7474	113.767	51.4923	37.0746	112.725	35.8975	35.6744	35.7398	37.805	36.2451	37.9996	28.2765	32.2878	41.0342	80.9304	20.5326	37.5784	37.4484	47.31	22.5214	39.025	44.2635
INS	0	0	0	0	0	0	0	0	0	0	0	0	0	0	0	0	0	0	0	0	0	0	0	0	0	0	0	0	0	0	0	0	0	0	0	0	0	0	0	0	0	0	0	0	0	0	0	0	0
DCN	20.5415	26.1244	12.3207	4.84075	15.9276	4.59112	6.41428	3.11268	11.4076	30.8097	47.2017	28.1483	18.3326	13.0287	19.8059	168.66	187.133	6.59325	17.1839	1.09376	8.19768	12.2252	27.6012	35.1808	137.698	22.5385	4.59414	21.6264	82.542	7.46626	10.8605	65.8345	41.6767	20.1651	15.8359	7.7586	5.5986	19.8464	36.2186	45.3411	5.06285	18.3825	10.2404	12.0422	6.05142	19.921	2.63095	41.8481	22.3528
B3GNT3	22.0222	3.10795	4.47294	0.802147	0.144463	7.91955	50.2081	37.7008	0.245307	7.55505	28.0234	6.68701	24.357	22.9697	51.2976	6.63388	1.11488	42.4469	0.615552	0.886766	16.3442	6.50161	1.04977	1.20912	11.0825	0.439443	48.0442	27.4472	1.39182	0.604142	28.7419	5.38251	7.00539	26.933	14.9843	5.18353	27.2711	16.1391	34.1027	19.3462	17.4556	0.658082	7.02814	3.24584	5.51179	0.572909	6.37916	7.18295	23.3714
GCLC	4.40053	7.39759	6.40625	6.24334	6.1372	9.11157	5.1675	21.3537	5.79887	4.90122	5.51135	5.18055	22.6558	4.90982	6.82746	3.0391	6.98429	32.4497	3.24264	7.32369	7.40245	10.4118	2.28723	1.43938	3.05361	3.76646	20.4468	10.8618	1.71622	5.14037	13.327	2.43346	5.56266	3.65898	4.84103	3.53166	3.67872	7.1829	3.23148	6.14545	9.16429	2.46991	2.30203	6.3537	13.4496	18.9965	1.58571	3.94899	17.9708
CBFA2T3	1.61652	1.68548	0.855228	0.906593	1.51876	0.416098	1.21849	0.458894	0.462079	1.15675	0.81538	0.506908	0.723491	0.33864	0.530663	2.26238	1.018	0.484698	0.293499	0.230203	1.2268	0.347236	0.721495	1.07444	2.24279	0.878833	0.53632	0.976534	1.94491	0.609323	0.509782	3.00165	0.719289	0.43058	1.26414	0.97641	1.55024	0.689798	0.90944	1.49666	0.791016	0.752831	0.388469	0.946967	1.51868	0.246113	0.289461	1.33942	1.74111
QSOX1	25.7566	13.1525	19.3733	23.7984	23.8673	17.3692	42.1045	40.5329	8.82386	26.8269	47.8854	27.9833	38.3364	21.4901	30.0967	11.6599	16.614	33.8959	15.5029	10.5251	15.9592	24.2529	47.391	22.6043	24.9644	14.0014	47.9088	37.4057	9.68893	16.4054	27.997	15.881	15.6373	40.7052	17.7983	30.3837	20.2559	29.1368	41.1631	25.436	33.3438	9.99587	7.16885	22.1808	20.5241	11.3672	15.1881	33.3303	19.3407
MPI	4.03613	4.84091	2.74466	2.65321	2.93987	2.61851	2.98981	3.32109	2.9737	3.14009	3.78186	3.31424	4.03798	3.17831	2.80439	3.7663	3.47936	3.65989	2.16587	2.09348	3.22214	2.63978	3.73105	4.48353	4.7147	4.35684	4.27948	3.11335	5.57012	3.19128	2.88316	6.8282	3.59148	3.09827	3.33222	2.71174	4.4931	2.69739	4.56149	4.16542	2.3192	3.94649	3.11785	3.62974	2.53899	6.31602	2.72246	2.47232	4.08642
STC1	0.979457	1.50943	0.302155	0.213535	1.30192	1.06601	0.699485	0.764272	0.396798	2.94944	15.8147	1.61023	16.1811	0.516105	1.26969	13.0001	4.7516	2.63598	1.0028	1.40562	1.56653	2.20945	1.50269	4.79064	4.59999	3.55122	2.18328	2.45527	6.03381	2.51782	2.64782	3.31404	9.52155	1.65272	1.39243	0.22547	2.21125	1.58642	0.858281	12.8184	0.107627	4.44733	1.5107	0.4704	3.96909	3.57903	1.39613	1.86008	8.45393
GLRX	1.2899	1.20684	1.03925	0.835707	1.85702	0.708424	0.731513	0.828971	1.06969	2.37958	4.68935	0.641598	5.43453	0.903524	0.963235	1.75148	6.288	3.04301	0.63387	0.233479	1.30619	0.548764	1.27399	5.20321	5.14827	2.80039	4.85211	1.01651	3.54173	1.49522	0.736531	2.62611	1.17019	0.846681	11.9398	4.77703	4.85828	3.01545	0.513713	4.25191	0.615724	1.52318	3.20619	0.864252	1.92611	0.956923	1.79177	2.05105	2.24475
PGAM4	0.124698	0.162108	0.222546	0.128679	0.310374	0.306442	0.112128	0.0937794	0.368922	0.0198466	0.1201	0.081873	0.026895	0.177721	0.127186	0.0347323	0.160778	0.119849	0.393441	0.227	0.0864745	0.236649	0.0426695	0.0327644	0.0262889	0.0944125	0.0922204	0.157589	0.0294816	0.053446	0.118542	0.0798836	0.133241	0.302343	0.0902613	0.366853	0.0655343	0.158965	0.167443	0.0207526	0.153609	0.0408125	0.177345	0.100442	0.35342	0.158457	0.118931	0.151539	0.0615025
GPR87	27.2698	17.65	30.9814	24.7403	27.3373	30.033	45.2718	30.1499	33.9531	13.609	12.6073	24.8613	25.3488	57.1291	31.7203	5.89144	33.817	29.3119	32.4067	26.7693	30.9727	31.9271	15.2446	7.73494	12.6849	18.4463	13.528	34.8158	0.146106	39.9471	29.6103	1.88347	21.0359	27.7637	35.1078	30.5305	5.63931	19.3817	29.9866	14.2769	37.724	11.7035	1.5101	27.6762	73.5625	25.9412	28.577	20.121	21.308
PGK2	0.0152143	0	0	0	0	0.012463	0.0114006	0.034326	0	0	0	0	0.0164073	0.0135523	0.0110842	0	0.0140118	0.0208896	0	0	0	0	0	0	0	0	0	0	0	0	0	0	0	0.0108496	0	0	0	0	0.0102148	0	0	0	0	0	0	0.0120833	0	0	0
IER3	45.1924	32.9237	73.7899	26.4066	42.4093	57.3508	78.9674	97.1999	131.839	43.9357	78.235	51.455	114.815	129.69	63.9527	68.1008	109.105	84.9232	235.477	166.9	388.381	121.686	90.1031	179.132	85.7685	143.936	226.775	54.0098	29.1398	147.052	121.878	24.2461	225.765	86.9303	47.1366	23.7778	46.5721	39.6168	176.101	61.9107	38.6158	216.398	13.8671	121.218	102.23	117.823	81.3985	49.4512	331.48
TXN	344.269	630.579	687.143	336.285	365.915	452.544	649.809	537.959	893.783	192.575	96.5829	311.665	340.546	1095.32	603.174	171.45	157.506	1030.35	757.68	662.206	752.606	487.265	733.706	279.926	93.5638	266.45	528.002	705.042	29.1298	213.901	419.676	29.3782	776.188	509.727	207.815	674.765	75.0396	183.637	633.582	78.3083	673.868	548.36	46.8664	632.643	240.127	352.752	1209.47	505.127	148.317
TALDO1	67.4327	75.0267	100.681	62.0611	72.1474	88.7733	101.768	97.1861	94.9726	50.5601	51.8849	107.021	67.8383	154.971	121.447	43.9358	56.6767	86.136	84.4058	83.837	71.5795	75.9471	173.313	162.575	44.3513	49.1598	99.8996	75.7232	21.4877	67.9555	126.868	26.173	99.7828	101.835	85.4487	64.4974	49.6165	65.2	95.2071	42.9411	123.26	51.0766	28.9126	86.1457	74.2842	48.629	70.4442	62.2873	101.559
NUP58	3.87359	3.25838	3.60567	5.03673	3.3467	4.27528	3.44446	4.02417	2.87948	2.93835	2.14954	4.5974	3.93845	3.24825	3.75165	3.16639	4.31935	5.02698	3.30755	4.58354	5.21759	4.94589	0.927086	1.7845	3.53516	2.50177	3.50915	4.17149	3.31961	3.9368	4.53337	2.67382	2.82369	2.57566	2.22613	2.65539	2.10374	4.44858	2.37456	3.04506	3.31945	3.60088	1.00235	3.23956	4.97848	11.352	1.57719	2.98106	3.95916
HS6ST2	3.07696	1.93822	3.91931	2.10388	0.784575	2.30891	4.45822	5.03407	2.32906	1.15067	1.56903	6.86075	0.948066	4.09753	2.4271	2.7279	0.134941	5.97713	3.13091	3.2727	3.47611	2.31501	1.18747	0.395119	1.55263	0.963397	1.85639	2.23544	0.50139	1.35516	4.39338	0.728688	2.78396	2.08426	0.134899	0.501012	0.385021	0.565276	2.35322	0.208554	2.20155	1.80464	1.45046	2.18029	16.3577	3.6105	0.557759	1.67017	0.0142632
AAAS	5.97536	7.26754	7.10642	7.28543	6.61585	5.59727	4.99233	6.04374	7.7335	4.82118	6.77194	6.41767	7.58251	3.42521	7.35962	5.51565	7.12512	5.71961	4.91183	6.84395	9.17238	6.15281	7.60442	5.18498	6.50765	5.21881	6.74457	6.20548	4.63822	6.73862	5.41617	5.00643	6.10887	5.36918	8.91074	6.36761	7.53581	5.33395	5.58127	6.52217	8.28087	4.32334	4.354	7.56498	13.4179	13.955	9.61197	6.07533	11.0062
CXCR4	16.7454	3.59659	12.2898	13.6549	12.2668	5.27745	3.80551	1.52902	7.60695	7.64595	12.5518	3.04152	10.5186	1.54358	9.531	5.74652	7.76621	3.0801	3.00918	7.54145	8.26169	14.889	5.28381	64.9385	12.4699	18.6518	7.99381	2.28345	2.74819	7.64778	5.2484	3.20576	10.024	4.68604	12.595	9.07853	5.65056	7.90808	1.98131	30.6236	3.68807	7.5527	3.06841	6.56441	35.7408	14.4916	4.26819	8.92839	13.4336
DHTKD1	5.23843	7.97633	4.06782	5.53617	4.68937	4.72319	5.65791	8.7323	3.65185	6.20992	6.3559	4.06009	6.56084	3.23416	5.27454	5.87653	6.19185	6.67415	2.27303	3.4719	6.75497	6.29207	1.21149	1.11536	5.27053	4.81413	6.80237	5.81832	7.04661	3.68913	6.56703	6.23337	4.62952	3.94689	7.27414	3.49555	6.15477	5.95261	6.09785	6.66174	6.49749	5.21739	8.81425	5.48241	5.01255	7.90762	3.43128	4.31824	7.87127
PGAM1	30.4309	14.1897	33.3889	32.8802	20.6739	36.704	30.7917	27.6349	26.4922	18.7714	15.2591	36.0887	13.3319	47.3242	29.5638	10.983	24.9056	27.3942	40.939	32.2898	26.8875	23.405	12.7238	20.3114	11.7549	8.82194	16.3075	24.9807	5.38366	32.9335	37.6391	6.13965	33.5285	38.4057	21.0627	36.3978	11.5638	32.5804	30.9261	13.9345	32.6496	16.553	9.40385	28.2099	49.9902	29.1779	10.7114	35.3406	26.0164
HS2ST1	2.26767	2.47892	2.64374	2.7959	2.41942	2.79374	3.17911	3.24859	2.38491	2.52806	6.0208	3.35548	3.99087	2.55068	2.98985	2.78971	5.76389	3.24051	2.67872	2.16027	3.7422	3.21448	1.55104	2.83071	3.71414	1.67868	3.38071	3.01632	1.95813	2.35554	3.81552	2.12231	3.19099	2.59142	3.57844	2.15117	3.94555	3.25137	2.61395	5.70792	2.73966	1.52557	2.55304	3.29942	3.71212	4.86453	1.39614	3.6738	9.32882
SLC25A10	4.92072	2.83102	7.4167	6.86372	4.94168	4.92529	4.36909	8.44143	9.63125	4.05489	7.71771	6.38038	6.60965	4.64904	7.11687	1.86529	3.22455	6.49143	6.89684	5.27834	6.03858	4.8978	17.7845	10.2325	3.60633	3.87628	8.33878	5.13429	0.937933	6.91837	8.00727	1.95076	7.15011	7.31921	8.04396	6.86467	8.97727	7.93399	6.6466	5.73005	9.06553	2.22756	6.03548	6.97729	3.3947	10.9958	10.1477	5.69307	13.7684
ALDOB	0.0155681	0.0337312	0.0315729	0.0200815	0.0193746	0	0.0116657	0	0.0127941	0.0309724	0.0374853	0.102216	0.402932	0.00693375	0	0.0758838	0.164883	0.192379	0.014447	0.00590423	0.0337378	0.00671475	0	0.0409054	0.0492314	0.0392904	0.184215	0.0245931	0.064412	0.00834072	0.00528559	0.0332441	0.00594098	0.0111019	0.0563443	6.39298	0.18409	0.0496157	0	0.0971588	0.00958883	0.00636915	0.0166058	0.00626994	0.0200561	0.0618215	0	0.0270275	0.076784
STMN1	10.1138	7.95588	17.8971	11.6072	18.4401	15.1168	14.7941	15.501	13.8386	7.6653	6.93121	10.1437	8.39616	14.2803	16.3905	7.03827	18.3818	11.8928	7.66333	14.3857	16.3481	14.4233	13.0704	8.31088	10.2852	9.6593	7.33994	10.5421	3.13032	11.7545	13.0646	3.02252	8.95635	7.49266	12.1645	11.201	5.92807	9.8111	12.2038	12.8127	20.7094	7.9712	1.45615	18.7156	15.9815	79.6998	19.0266	9.61236	34.0152
GAPDHS	0	0.0136068	0	0.0486041	0.0234466	0.0411548	0	0.0188917	0.0103221	0.00999518	0.0100808	0	0.0135449	0	0.00915052	0	0.17351	0	0.0116556	0.0666878	0.119764	0.032504	0.0859571	0.0165008	0	0.0316987	0.0185776	0	0	0.0134583	0.0170572	0	0.153378	0.00895683	0.863692	0	0	0	0	0	0.00773609	0	0.00893147	0.252924	0	0	0.00998267	0.0327079	0.0309739
PRXL2C	3.05606	1.7358	2.49419	1.61991	2.28659	2.29057	2.38273	1.37713	3.66051	2.67814	5.02977	2.19337	6.17775	0.975372	2.83491	6.82347	6.31841	4.52732	3.05988	2.60426	4.10239	3.19125	1.64058	4.96581	7.07538	2.86498	4.02154	1.86657	6.54517	2.08806	1.49545	3.64605	4.40051	1.97199	3.61221	2.27499	2.08078	3.37143	1.39142	4.77714	1.71466	4.93532	0.646671	2.12775	4.08849	4.28435	3.98759	3.5442	6.52956
ALDOA	702.657	533.798	193.962	194.847	316.502	235.757	179.491	220.149	231.139	316.119	235.641	220.404	140.305	253.718	238.869	537.201	157.643	222.597	177.149	208.875	225.837	200.314	355.542	293.518	449.669	495.48	275.216	208.532	865.325	350.198	284.127	806.275	201.601	283.162	254.17	216.481	214.128	216.468	263.894	144.685	253.04	621.912	123.011	227.902	247.561	298.927	283.91	179.381	324.532
TPST1	1.90056	1.77099	3.59568	1.10577	1.34803	1.37178	2.89811	3.3934	1.20147	1.84561	6.63498	3.08328	7.54621	3.16688	2.9242	8.6161	6.68313	4.18345	1.54786	1.28029	3.59452	1.45031	3.00158	7.4295	7.95054	1.77776	5.95645	3.26478	5.09043	1.32442	3.42939	2.85227	5.0668	2.26046	2.10845	1.47169	2.08381	2.34025	6.30876	3.40076	1.84596	1.67472	0.949825	2.33378	12.9186	15.7858	1.05105	3.84752	9.00511
PYGL	17.9773	13.2034	18.8705	8.41188	2.70691	15.8761	28.3752	28.1253	29.7931	4.98706	9.42764	44.0962	14.374	25.329	20.2672	6.2992	28.9159	24.8416	23.5166	16.6338	30.7016	19.8263	8.53813	39.3628	9.37648	2.50888	13.8509	24.856	3.37972	16.1994	14.9017	2.81058	27.0074	40.1698	8.62524	46.543	10.6892	41.3608	10.3772	11.1408	30.715	14.677	4.36584	9.36855	47.9946	16.921	28.3805	17.3826	20.882
EFNA3	5.32685	2.73924	12.0719	13.2396	23.4948	13.5982	7.69113	5.90014	13.2645	8.74057	1.86897	15.8469	3.0501	8.01213	8.56986	1.42663	19.476	5.39967	14.0693	15.8282	2.70295	11.949	12.2772	10.6089	0.537277	21.1872	6.20118	8.54907	0.200842	9.6058	21.1189	0.30945	7.64299	11.6099	16.7591	20.8754	1.7858	6.08359	9.12559	1.13101	8.90721	2.68221	1.12998	13.8301	5.80671	10.0805	32.4164	7.53013	5.76719
PRKAG1	11.3903	12.4031	12.5216	12.4184	12.1741	12.1605	10.2892	10.6069	10.8887	10.174	10.6813	10.8741	10.8699	18.4083	12.3864	10.1038	11.7511	12.1664	12.241	9.17318	10.291	10.7612	6.90673	7.61405	13.6575	12.1063	8.60024	10.5942	11.3064	9.04594	11.5901	11.0794	10.3841	10.4639	13.0997	11.8953	11.9612	10.7068	10.0597	12.4504	13.0743	10.5979	7.72741	11.9878	11.1457	15.5549	7.32556	10.0617	11.3596
CLN6	5.45945	3.83045	8.98584	7.10046	5.77714	4.69411	6.60847	9.50211	9.19228	5.34358	8.7201	8.02985	8.77042	3.56384	10.4223	4.91784	9.26156	9.18861	5.99659	7.07636	10.4553	5.43012	8.88486	14.1727	7.06385	4.2851	8.77641	7.47942	3.03203	5.89826	7.82818	3.67389	7.07905	7.30024	17.6397	6.89705	9.8448	9.28971	7.2642	10.2694	10.6692	2.86721	4.0203	6.97272	9.92457	14.5786	19.9658	5.66801	11.4812
COL5A1	0.83722	3.05164	3.42213	1.13053	2.23558	0.863209	6.40902	0.577059	1.64793	2.26878	7.4723	1.89576	1.58324	0.258208	3.01372	61.219	17.9131	1.00905	2.28016	1.20152	3.14831	1.86068	1.47326	39.0723	9.77062	1.71704	1.0227	1.87475	7.58298	1.42877	1.33382	5.1431	6.81672	1.82151	2.41089	5.05263	2.84669	5.43291	5.35775	8.63525	0.582882	1.72725	0.934854	3.68774	24.7435	32.3376	6.83849	37.4412	32.1701
GPI	55.4795	41.696	34.9507	32.1965	34.0546	37.3185	31.0121	42.8747	33.2701	29.0823	43.0091	42.0554	21.8098	25.768	41.8103	48.3611	34.5939	41.8103	27.8668	39.8341	41.1623	39.1452	19.1977	28.3877	37.1409	34.6305	35.5251	35.3681	48.6265	46.8697	61.0812	62.0298	32.1334	47.0128	39.5516	30.9019	39.0216	34.189	34.8279	29.1694	45.0571	48.1258	20.6809	37.112	41.0194	87.2214	38.6348	30.5631	67.6697
ME1	11.8853	19.2586	14.3751	18.3388	35.464	24.6969	19.2159	15.4123	9.15356	17.1148	6.58207	13.2537	3.83296	35.2193	15.8458	11.5195	39.6919	12.6665	21.2027	12.6511	4.44978	25.6559	7.68849	7.42797	12.7551	20.9399	8.66841	10.8628	13.5548	9.26035	30.2065	13.8139	18.3237	17.0078	44.6062	24.2633	1.67559	30.5238	8.74731	2.86809	13.2745	11.4152	1.60984	26.5458	12.3951	7.42115	7.90347	17.3029	12.9871
TGFA	16.5146	4.68515	8.92822	21.1586	5.73856	11.6073	21.2299	14.7501	8.92163	5.10576	4.87181	11.9637	6.98122	15.916	16.3586	2.28869	7.47722	13.5517	6.08949	15.9146	14.099	9.38791	2.72292	10.3784	4.22238	3.16281	11.9206	13.3053	0.395355	21.1681	14.4089	1.23954	5.38092	15.6532	5.43996	9.52501	3.52879	19.1919	11.0362	5.05094	15.0778	11.0625	1.45155	6.33222	13.0793	11.4582	11.0176	10.1809	15.2107
POM121C	3.83881	2.75128	3.87147	4.58119	2.71777	3.60097	3.1603	4.60872	3.2013	3.56924	4.26353	4.92471	2.87253	1.05647	4.24583	2.87159	5.36122	4.30418	3.3786	4.6763	5.21595	4.47161	1.46698	2.08134	2.56004	2.15021	3.44092	3.46698	2.0143	4.21128	4.24838	2.20038	3.3667	3.60504	3.8803	2.2479	2.68196	4.07638	3.00692	4.01828	3.64449	2.5374	1.55988	3.66881	3.7119	6.95488	2.08075	3.6666	5.54107
PFKFB1	4.06049	4.3989	0.052643	0.573991	0.888366	0.189851	0.215349	0.174298	0.16761	1.91812	0.803584	0.0304338	0.229941	0.0578048	0.0742935	5.68715	0.136605	0.241845	0.0344117	0.0914122	0.265191	0.167937	0.459973	0.158329	2.6287	2.26948	0.0959845	0.571144	4.51507	1.04302	0.132194	1.80146	0.191038	0.13222	0.0782878	0.151518	0.121802	0.177271	0.130708	0.161997	0.0856495	4.17198	0.0263691	0.268822	0.155259	0.294508	0.117891	0.128755	0.171463
B3GALT6	3.78552	3.9075	7.6187	6.05277	4.06557	4.14773	3.33084	5.34765	9.19184	4.31369	6.21994	7.84132	6.32726	1.32799	8.00343	5.0136	7.78884	4.69295	5.2343	4.71085	6.63436	3.50848	13.8703	18.2322	5.42426	5.115	5.46199	4.74277	4.2313	5.4991	4.11462	4.21784	4.2263	4.65436	7.46776	5.49651	6.45703	5.28231	3.39031	6.13992	7.01597	3.4572	2.34502	5.877	7.05411	9.16677	7.22964	5.03333	14.0792
ZBTB20	0.159009	0.18724	0.0299109	0.0564787	0.0960757	0.0490811	0.0328096	0.058925	0.0662848	0.161381	0.349572	0.0605221	0.0646144	0.039002	0.035257	0.596938	0.171909	0.0885949	0.0149697	0.0402028	0.173792	0.0755404	0.0946265	0.0423851	0.247774	0.139583	0.129525	0.112852	0.50942	0.0666704	0.0641568	0.285416	0.13543	0.0361541	0.161247	0.0112994	0.246258	0.137707	0.109852	0.27038	0.0269684	0.279067	0.185174	0.076105	0.0415633	0.16289	0.0366317	0.144027	0.0198904
PPIA	58.6438	43.259	91.193	70.77	68.0245	63.0149	79.5687	58.6685	100.822	36.6892	50.2294	71.7621	57.3371	102.731	94.456	30.413	71.857	75.336	85.9435	85.6031	71.3361	65.0813	97.5804	107.311	48.4035	55.7825	41.008	57.8295	15.9278	79.5261	64.5264	18.0355	73.6347	68.3863	80.7711	94.448	46.3971	63.8806	64.8041	49.798	86.8686	40.8269	22.5605	71.8589	80.197	84.118	163.17	63.1092	60.5315
MED24	9.73393	10.3136	9.04124	9.11293	8.5125	7.62795	8.19546	10.9539	7.96797	8.74934	21.6538	9.956	13.5116	3.94962	8.61889	11.3444	10.6353	11.0641	6.4721	8.6179	16.1415	8.41568	4.21976	9.7314	11.4854	8.94607	36.4275	9.24901	11.1504	9.35239	9.14962	10.6036	9.21744	9.78684	14.821	8.61303	13.7444	10.4848	9.31357	16.984	10.1712	8.88618	6.52232	9.71459	11.0361	16.1667	7.40106	8.34715	12.1374
PRKAG2	2.43155	2.78753	1.49719	1.8001	1.66276	1.73908	2.27596	3.09105	0.918885	2.55447	5.15271	1.75942	5.04599	1.98439	1.92409	2.12285	3.42812	2.91688	1.0481	1.98604	3.20705	1.48707	0.707086	0.918545	4.83082	2.77186	2.23788	2.66733	2.35907	1.79863	1.72028	3.47867	1.27034	1.31008	4.22768	0.566744	4.27203	2.05913	2.10195	4.32696	2.00327	2.14706	3.38166	1.61429	1.40033	0.517072	1.25089	1.26051	3.80444
SPAG4	0.264036	0.202997	0.525114	0.142825	0.137798	0.286058	0.542496	0.320273	0.454977	0.786246	1.86624	0.130485	1.93806	0.531082	0.316465	0.373643	0.38436	0.467779	0.110655	0.148589	0.369157	0.426141	2.59389	1.53298	5.04571	0.214957	1.42357	0.309461	0.342329	0.0821375	0.185071	0.663854	0.442041	0.273323	0.986427	0.431543	1.1489	0.936491	0.646187	1.82146	0.918056	0.299671	0.732855	0.315585	0.680304	0.358518	1.25236	1.21251	1.52281
PLOD2	4.07226	1.95713	3.71036	2.61677	1.46573	3.61995	2.96548	4.45122	2.79092	2.69063	4.99076	5.47471	6.82146	5.21663	4.02664	3.23353	2.32561	3.44318	2.22526	2.97526	3.83931	4.36308	0.764184	3.58958	3.53771	0.985552	3.29953	3.68556	1.4955	3.3341	4.50527	1.80898	1.82445	3.56773	1.54127	2.38375	5.1209	3.03583	2.66373	7.15509	3.07072	1.75994	0.881866	3.38466	16.8059	16.4604	2.5643	4.68501	3.17827
BPGM	7.18364	12.8783	13.1058	8.23883	19.2081	14.8468	17.9338	6.64574	15.3087	6.96645	11.4046	3.55224	8.95433	9.05621	7.53285	6.60853	6.24907	22.729	40.0329	13.1547	16.3233	13.4632	5.32252	5.36044	9.3466	5.88842	6.35187	11.8525	4.43251	9.34795	3.10226	5.11063	54.3398	4.77985	8.53945	19.7669	11.5774	7.7891	11.987	17.4577	8.84458	22.042	6.43346	7.33579	35.9146	11.8104	20.0908	20.9639	26.4062
B4GALT4	3.09479	1.93237	2.99143	2.07694	1.78119	2.36889	7.83149	10.8782	1.87185	2.08881	2.83752	3.82781	9.76758	3.02549	6.34578	2.19776	1.84929	6.50949	1.27861	2.38791	6.89538	2.22279	1.69493	1.83118	2.07725	1.38824	10.7467	5.42667	0.931177	1.57937	6.80476	0.932274	2.01556	5.17178	1.72987	2.09702	2.24298	3.42528	4.99826	2.66632	6.32373	1.52503	1.33295	2.96599	2.46303	35.5261	1.09934	1.93309	6.12071
G6PD	18.8781	15.8819	23.7601	26.9255	38.653	28.1769	20.8413	28.7971	24.4594	14.8347	18.789	37.663	8.88667	17.7369	26.7724	9.91098	26.7233	22.8302	25.8627	27.3467	23.0216	28.6027	13.7821	19.672	10.7794	13.9167	30.8405	20.2131	3.08901	28.5509	42.4346	4.03672	29.8804	36.0329	45.6423	30.203	13.8367	27.611	19.872	13.5686	32.2562	9.61732	5.9769	35.0029	38.8926	29.0344	19.8694	29.4117	49.3328
ENTPD5	2.40989	2.33393	2.24126	2.95679	2.55531	3.43921	4.02623	3.2971	1.60282	2.23812	1.92534	3.6308	3.05478	2.75084	2.70922	1.7984	2.12122	3.11071	1.84059	1.30505	2.0635	2.99061	0.569249	0.48299	1.58307	1.58429	2.2798	2.64248	1.16689	1.33543	4.04414	1.92732	2.84942	3.79494	2.16439	1.49168	3.22503	2.84571	2.81389	2.48101	2.78861	1.23334	1.97379	3.25594	2.18104	1.45261	0.726115	2.50834	1.56847
GAPDH	1699.03	1408.71	903.011	818.978	1084.03	791.006	705.49	837.96	763.089	1069.04	612.001	864.989	586.403	1108.57	1193.28	1377.14	483.741	1031.86	918.145	986.73	805.104	740.278	1174.12	1295.83	1389.31	1462.26	730.738	608.949	2087.93	1056.65	1140.5	2244.5	920.383	1147.91	627.811	827.131	589.238	733.606	814.042	494.182	1089.92	2004.34	334.344	1058.35	990.85	1296.52	1758.91	695.671	2114.08
NSDHL	30.5585	14.7353	26.984	31.8104	28.9539	33.4573	20.9647	30.4074	27.3129	14.5589	11.1317	28.827	12.4211	30.7282	31.4274	8.10018	22.2275	21.3856	24.6945	29.9213	20.2171	31.918	29.9765	18.9744	8.98749	11.7964	18.9873	23.5176	4.16944	33.5017	25.0857	4.83744	22.6153	28.1992	43.8884	31.6668	10.725	30.166	19.9007	10.1729	32.186	12.8812	4.83949	22.3046	20.3427	30.1834	32.1051	20.3446	15.6871
GAL3ST1	0.0822086	0.0890601	0.0153898	0.0244712	0.0196748	0.0103603	0.00947721	0.0142674	0.0103939	0.080518	0.0913587	0.02076	0.0272784	0.0168989	0	0.074858	0.110654	0.0347307	0.0176051	0.00959315	0.0274084	0.0545504	0.0216388	0.0581549	0.206643	0.0957581	0.0982115	0.0449535	0.201837	0.0677597	0.0472339	0.10803	0.00965286	0.0135288	0.167838	0	0.0664683	0.0503846	0.0764232	0.0526209	0.0155799	0.0724399	0.0269809	0.0509368	0.00814675	0.0401788	0.0150782	0	0.709562
TPI1	236.972	189.089	202.423	161.669	170.391	193.157	169.216	156.497	174.928	148.307	103.769	194.193	158.936	246.554	218.904	140.394	155.052	194.546	203.835	194.199	155.68	176.52	283.395	246.145	132.941	200.386	147.671	159.312	219.169	218.014	204.924	182.533	206.615	203.976	153.751	231.068	94.7589	167.313	208.205	106.215	216.299	219.783	65.2367	202.511	219.206	226.742	251.964	172.928	396.182
NUP50	10.3788	4.49008	7.94133	9.24571	6.9835	10.2925	10.6234	11.3917	6.54839	5.5379	4.57836	9.92427	8.46932	5.75136	11.0121	4.43369	7.43768	11.7672	4.27828	9.72348	12.2595	7.92027	3.77516	5.06538	3.51302	3.77423	10.5238	9.9424	2.14472	10.3543	10.1578	2.0767	6.40713	8.23392	4.06762	8.02992	3.71272	11.1239	8.36043	5.1704	11.1804	6.50856	1.84796	6.49402	13.0015	15.0249	5.57107	6.8749	9.75718
ENO2	1.15426	1.02837	1.22558	1.40266	1.18136	0.887114	0.621146	0.70719	0.622626	1.44344	1.08738	0.453543	2.54721	0.393008	0.555206	2.54468	2.37232	0.758761	0.562452	0.912693	0.873078	4.59021	1.58598	1.31735	2.11868	1.41718	4.34069	1.36579	2.11784	1.509	2.43606	1.25619	2.03403	0.610194	1.59681	0.651911	1.22963	1.60497	1.34946	1.73925	0.859168	0.667315	0.719385	2.02461	4.23712	16.0479	1.13347	1.62864	35.0261
PKM	201.285	169.739	183.986	161.094	154.49	126.321	152.932	109.138	161.49	127.971	165.635	203.308	137.971	147.537	166.35	156.826	117.337	203.428	199.37	157.075	195.956	117.599	84.6504	188.8	167.069	162.723	142.908	141.124	202.362	183.621	142.626	197.217	150.985	193.182	114.03	222.436	107.561	190.643	180.842	113.864	168.168	214.81	53.864	144.181	362.811	205.425	236.798	196.25	176.895
FBP2	65.7302	78.2088	0.0830186	4.4128	10.7983	0.922144	0.0219101	0	1.52587	16.9394	0.0117339	0	0.0630642	0.0130227	0.0106511	33.2992	1.65609	1.19436	0.596944	0.388118	1.93897	1.2233	4.22723	0.288101	25.5664	49.1097	0.0756843	1.46652	118.384	9.43046	0	51.1053	0.53559	0	7.81331	0	0	0.0582415	0	0.0121653	0.00900469	80.5541	0.0207922	2.57894	0.0188343	0.162555	0.0232394	0.152286	0.306452
PFKFB4	1.12154	0.863033	1.23928	1.53132	1.37244	2.04986	0.662497	0.845811	0.634151	1.01931	0.66697	1.28541	0.987127	1.55837	0.53714	0.515567	3.53602	0.697034	0.875529	1.41229	0.571405	2.18019	2.25561	1.3503	0.905605	1.11171	0.71854	1.12027	0.520719	1.88464	5.2206	0.420282	0.743923	0.913415	4.66589	1.58287	0.571909	1.30678	2.06393	0.873465	0.609973	0.50613	0.293242	1.30853	4.07298	3.16596	1.09997	1.37218	2.57705
POM121	3.19144	2.89136	3.14048	4.58272	2.17202	3.12666	2.67384	4.42777	2.1758	2.73913	3.33163	4.39148	2.36079	0.936071	3.50109	2.6159	4.35781	3.98588	3.32394	3.89702	4.4166	3.50706	0.48189	0.71198	2.20726	1.05154	3.02392	3.22806	2.12859	2.41438	3.51375	1.8147	2.8331	3.04467	2.80268	1.6477	2.38538	3.69115	2.9852	3.36038	3.13698	2.13452	1.623	3.51882	4.15651	6.72928	0.358173	3.47004	4.65608
ENO3	407.677	614.478	1.51453	45.9572	171.956	8.29493	0.166547	0.103634	18.9012	191.329	0.528025	0.126472	0.287624	0.126707	0.17164	357.404	0.540387	27.755	9.52068	5.27331	11.5136	10.1385	77.3769	23.342	278.907	428.81	0.696938	18.5383	927.291	84.9256	0.211288	751.951	12.0202	0.0412094	3.26587	0.265182	0.4244	0.205419	0.170115	0.469762	0.216295	543.93	0.151727	25.0172	0.332145	7.85513	0.14132	3.09073	1.39219
CDK1	5.19799	3.40186	7.05148	7.04928	6.62296	6.40886	6.45173	7.4132	5.33675	1.75348	0.946577	7.50447	5.00367	10.553	9.28175	2.05816	4.80056	6.18406	3.47251	6.56379	6.90812	6.05395	2.29185	2.39107	1.44271	2.29667	4.16005	5.46271	0.286866	5.23169	7.57327	0.3161	4.16356	4.98393	2.33621	6.56411	0.624918	8.53051	4.20353	2.59278	8.86042	1.88235	0.196722	5.78974	11.0232	22.4646	8.71015	4.15818	18.5038
ESRRB	0.300986	1.19016	0.0213645	0.135886	0.154514	0.0277375	0.0225539	0.0282947	0.0309193	0.562876	0.081531	0	0.024344	0.00335133	0.00822301	1.14486	0.0762289	0.0516577	0.0418967	0.0171224	0.0293521	0.0584188	0.0514963	0.158168	0.523497	0.859319	0.0111297	0.0118867	1.50771	0.173349	0.0102189	0.931949	0.0344579	0.00536597	0.0499276	0	0.0626136	0.0419669	0.010104	0.0281762	0.0162212	0.957396	0.0240785	0.0939453	0.00969384	0.050797	0.00897082	0.0391901	0
NUP210	7.04668	2.43266	3.90426	9.85658	3.02962	3.5891	2.17189	4.13858	3.53366	2.08572	4.69563	6.65726	2.20282	0.97207	4.38632	1.9874	5.37087	2.35959	3.36915	3.11817	5.70612	3.18215	1.02929	3.84763	2.83403	1.30057	3.80766	2.77556	1.16323	3.20064	6.76724	1.47138	4.52039	4.38161	3.75828	2.57059	3.43538	7.56521	2.52837	7.1598	4.78978	1.69044	1.65482	4.15275	6.04705	7.87994	0.971128	6.12894	8.73767
NDST3	0.00272203	0.0147445	0	0.00351118	0.00169379	0.0178383	0.00407943	0.00614135	0.00223701	0.012997	0.0830195	0.00595737	0.00587094	0.00727405	0	0.0113726	0.0150413	0.00747485	0.00252601	0.00412934	0.00235957	0.00469621	0.00465718	0	0.045909	0.0034349	0.0100654	0.0129001	0.0514845	0.00291669	0.00369667	0.0871893	0.0124651	0.00194114	0.0525419	0.00444892	0.0119213	0.030363	0.00731024	0.0113253	0.0067063	0.008909	0.00580692	0.00657767	0	0	0	0.014177	0
RBCK1	15.3284	13.9555	16.8578	18.4268	11.5001	10.8009	11.4222	14.7333	21.029	9.67028	18.0336	13.2197	13.437	9.47289	14.2761	12.3805	15.6932	11.7535	11.8091	13.1586	16.493	10.4538	19.7849	20.1315	15.2532	8.77691	19.8041	13.8898	4.69676	15.1596	11.928	9.4562	16.0739	12.1583	19.8021	20.9304	21.9231	14.234	17.4283	17.513	14.5954	7.68901	12.1273	14.3136	26.6066	14.4935	24.4865	17.8575	32.8025
TPR	7.34415	8.19221	8.77116	11.2249	8.69285	8.84563	9.36962	9.89739	8.17476	7.54831	8.47222	10.2681	10.1357	3.06454	8.75621	8.96394	12.9568	10.6882	5.85191	8.66284	11.2808	10.9901	2.44222	3.50907	5.86884	4.82284	10.5589	11.0733	7.13491	7.20227	10.7668	6.64551	8.10837	5.12379	4.81765	5.76181	8.90635	11.7657	8.84936	8.74901	9.31621	5.91693	3.58452	8.7863	8.77869	8.60316	3.25866	9.50351	11.7052
EIF6	117.864	54.5444	148.351	144.096	113.591	114.011	119.008	137.882	185.497	70.6268	54.4692	138.542	78.39	174.338	148.438	39.9364	87.0595	141.211	167.044	157.964	148.571	113.506	168.814	153.558	48.0478	68.3724	122.988	116.643	17.5247	150.894	117.742	18.5162	133.053	142.529	94.0631	167.313	53.7986	101.272	131.521	52.8933	178.42	99.8633	26.0481	101.331	82.2795	117.11	141.697	92.2241	71.6519
HOMER1	2.69719	1.60541	2.09244	2.93927	1.90983	3.27605	1.33346	1.89087	1.87773	2.5214	2.40863	4.05068	1.5981	1.14881	1.91532	2.24512	4.20282	3.63308	3.93856	2.69719	4.01766	2.52725	0.371296	1.03859	2.13398	2.15558	1.42152	2.03488	3.60254	3.3784	2.35143	1.92316	1.5309	1.37735	1.41376	2.89074	0.754911	3.02341	1.0116	1.72585	1.44932	4.18807	0.348321	1.62067	2.81174	1.59305	0.788492	2.19594	1.45261
VEGFA	6.21635	5.7247	1.58621	3.43286	1.6083	2.93489	3.09882	4.41852	1.91549	3.16468	4.94367	7.19888	3.96638	2.17276	2.3646	5.84209	3.49077	6.33425	3.70512	7.80872	7.087	3.71103	1.7417	4.88581	5.03089	5.39527	13.7724	4.86511	4.04308	5.76844	6.62068	3.56985	4.22381	4.69227	1.8932	2.33582	1.7347	2.0056	2.86083	3.48186	2.01457	6.62682	1.67436	1.34391	7.65754	18.1376	3.3341	1.36794	24.4164
HAX1	36.3868	33.4058	25.7328	25.5349	30.0183	22.0613	18.8075	21.4325	29.7868	28.1249	27.6482	26.1963	33.1964	37.9638	25.7804	31.2616	26.1075	23.576	25.8548	27.4115	24.7114	19.9709	17.5253	22.8316	45.4668	33.0908	27.9903	22.1811	43.3905	28.6583	23.4933	34.2467	22.0211	20.3924	39.454	23.7739	31.6544	21.8528	17.9628	27.4197	29.3096	38.7553	27.9648	25.0018	19.0813	33.2018	38.9541	19.3046	23.4046
IGF1	0.113241	0.125234	0.0459316	0.021302	0.118909	0.0599091	0.0565703	0.0461301	0.0891855	0.110768	1.44853	0.180714	0.699647	0.0546383	0.0807819	0.898596	0.354153	0.0842198	0.0678681	0.0125261	0.147243	0.0773338	0.46822	0.564089	1.06934	0.128012	0.0593212	0.0913072	0.716734	0.050558	0.145778	0.584384	0.599595	0.146367	0.108153	0.0269911	0.183913	0.0845859	0.169482	0.634087	0.0435926	0.150568	0.0738152	0.0684104	0.021275	0.0599578	0.00375014	0.18226	0.0232716
SAP30	2.68837	2.78716	3.48233	3.11352	4.37997	3.67034	3.13004	4.10882	3.42092	2.12787	2.56372	3.32144	11.0979	4.75077	4.82275	3.39172	4.67223	3.25461	2.13263	2.41188	4.74848	3.02974	4.05555	3.75971	3.44325	3.37417	6.37075	3.50478	3.46844	4.1196	6.2125	1.85185	3.3094	3.41166	3.45249	2.53948	4.10185	3.80026	3.49347	5.17164	3.81021	1.3009	1.35669	4.08639	4.80403	12.2712	2.09075	2.69745	4.93663
PPP2CB	21.8628	18.7557	19.1372	24.3973	20.3051	24.924	22.0682	21.6781	15.5507	20.4811	21.1856	24.4836	25.322	20.1369	25.9649	16.1975	19.3527	25.1805	17.0227	23.5655	21.3943	22.9849	13.7479	12.9708	17.5905	17.3047	21.6801	25.5306	16.2858	23.8428	22.2094	11.8992	17.3408	19.2241	15.1575	11.0375	16.9037	17.776	20.9613	19.8833	22.8283	18.231	11.0133	18.0423	13.2309	35.0862	6.65845	17.5072	12.6062
CLDN9	0.102374	0.0705764	0.0226493	0.0240096	0.046329	0.0304947	0.00697384	0.00699915	0.00764839	0.0444371	0.649858	0.0305526	0.160583	0	0.0203409	0.0712858	0.0685688	0.0830592	0.017273	0.0141183	0.0242023	0.0160564	0.143307	0.0733603	0.264877	0.05872	1.16319	0.0367547	0.110017	0.00997225	0.012639	0.119241	0.00710309	0	0.123504	0.00760548	0.546172	0.311436	0.00624848	0.766682	0.0974483	0.0533051	0.191922	0.0824605	0.0119896	0.0517401	0	0.0969429	1.67542
NUP35	2.23041	1.77774	3.32416	2.76146	2.45887	2.91249	2.23314	2.23416	3.47996	1.98508	1.89611	2.63163	2.84771	3.25527	3.6587	1.7534	3.45683	2.41497	2.94935	2.64317	3.73603	3.24195	2.01694	1.85848	2.38589	2.05288	1.45073	2.65931	1.72802	3.16297	2.19972	1.38957	2.00102	2.07814	2.8785	2.52789	2.51123	2.09268	1.72227	2.36606	3.04669	1.96389	1.4318	2.59799	2.20516	3.28815	1.8027	1.93608	4.77937
GALE	14.4889	6.40119	13.0687	12.1441	4.05874	11.3462	20.1687	23.6144	11.5406	9.33937	10.3047	18.5526	28.2346	28.3158	22.3659	4.85918	4.30214	25.9059	12.9737	11.7138	18.4881	10.9802	15.7631	5.92279	8.82701	4.44223	28.0563	18.7326	2.36987	8.3715	19.7874	3.92249	13.6828	22.7031	13.9384	10.1276	13.884	11.3415	23.7737	9.21495	22.7962	5.0584	10.4668	8.52985	6.64825	6.75728	18.0112	6.84008	13.7789
MERTK	0.81592	1.31489	0.668477	0.717352	0.442035	0.708272	0.921659	0.500662	0.303576	1.04664	3.6099	1.35927	1.51465	0.882274	1.38996	1.87122	4.86747	0.905699	0.195883	0.270951	1.74179	0.560268	0.71535	1.19991	2.22505	0.312465	2.05942	0.734233	0.772574	0.482805	1.08601	0.797476	1.41276	1.07107	5.72477	0.351632	3.13247	1.23225	0.844874	5.16468	0.365035	0.338787	3.31956	1.02342	1.00407	3.95898	0.219389	1.0289	7.79819
SOD1	54.1084	63.9412	51.2145	35.3363	67.9321	39.9035	33.0466	38.7452	72.393	48.5409	66.9088	49.7381	126.383	64.9146	53.3542	54.9893	46.0982	54.052	49.2385	40.2529	40.2685	40.2928	99.8344	97.8754	89.9966	82.8263	81.199	36.4159	70.788	63.3848	45.5702	54.3209	54.1921	34.9604	75.8443	37.9394	58.9322	41.048	42.4568	48.4686	52.6792	55.3994	25.3262	48.7898	68.0876	42.9132	101.602	29.7181	77.9147
[truncated: 497 more columns]
