# Supplementary material for: A Novel Prognostic Index Based on the Analysis of Glycolysis-Related Genes in Head and Neck Squamous Cell Carcinomas
Source: J Oncol. 2020 Sep 24;2020:7353874. doi: 10.1155/2020/7353874 (PMC7532401; doi:10.1155/2020/7353874)
Supplement: Supplementary Materials — Supplementary Table 1: clinical information for 528 samples.xlsx. Supplementary Table 2: expression of 298 glycolysis-related genes in 546 HNSCC samples.xlsx. Supplementary Table 3: the expression of glycolysis-related genes and survival of patients in the training cohort.xlsx. Supplementary Table 4: the expression of glycolysis-related genes and survival of patients in the text cohort.xlsx. Supplementary Table 5: univariate Cox regression analysis of the training dataset (24 mRNAs were identified, P0.05).xlsx. [file 7353874.f1.zip › 7353874.f1/Supplementary Tables 3. The expression of glycolysis-related genes and survival of patients in the training cohort.xlsx]

## Sheet: 04.train
Supplementary Tables 3. The expression of glycolysis-related genes and survival of patients in the training cohort
id	futime	fustat	DEPDC1	MIF	SLC25A13	PFKFB3	PFKL	RAE1	SLC16A3	DDIT4	NUP85	BPNT1	CAPN5	PGK1	NUP43	PGM2L1	NT5E	VLDLR	B4GALT1	PLOD1	OGT	CHST2	ENO4	ALG1	AGRN	NUP188	CASP6	SEH1L	HMMR	NUP153	GUSB	GALK2	P2RX7	POLR3K	CHPF2	KIF2A	PGP	LHPP	GNE	TPBG	ENO1	MXI1	RPE	STC2	ARNT	ALDH7A1	CHST1	EGFR	PGM1
TCGA-CR-7374	0.0821918	0	5.00585	14.9381	6.6447	13.1937	17.8199	13.5124	3.81972	34.8502	11.3025	15.5014	4.80597	85.5339	14.5368	5.93964	2.35936	1.1325	31.4383	20.3598	16.4365	25.3864	0.0374885	4.89386	20.8862	14.3848	8.84158	3.48187	7.19235	19.5886	35.5415	3.38101	2.70192	6.62453	10.1642	13.1475	6.14018	4.26608	5.28062	11.4135	254.569	7.84406	7.8245	10.62	13.24	8.76458	2.98978	20.6231	9.99563
TCGA-CV-A45V	0.0876712	1	2.31214	60.2057	12.8181	15.1023	21.1443	4.85877	9.63666	67.6201	7.2647	12.487	1.1431	146.994	4.85721	0.498253	2.00919	4.98525	24.717	18.9752	6.07342	8.91453	0.0134197	3.79173	29.684	13.0532	6.1734	3.2247	4.56853	11.5057	14.444	1.90283	0.344517	5.43954	21.5177	4.69602	5.80767	3.19703	4.96928	10.4428	478.017	10.5988	7.87834	0.88689	7.05384	14.269	0.830152	23.9588	14.6222
TCGA-CV-7102	0.153425	1	4.76587	42.6769	7.71848	11.3712	22.7154	6.3235	16.1171	112.678	10.0059	7.4685	0.885757	165.597	5.42964	0.944235	19.414	1	84.108	59.7874	4.79433	2.27856	0.0143052	4.15771	79.3546	15.3781	7.60186	4.46096	8.21059	14.1565	12.6911	1.59266	0.982058	3.67397	23.1637	9.0574	4.78565	5.36443	2.54255	16.4443	943.12	5.77029	6.7854	6.46033	8.1873	6.7981	1.69178	291.503	20.7569
TCGA-P3-A6T4	0.169863	1	1.19355	37.5297	11.3332	10.6582	19.5362	11.1409	3.21882	229.33	8.29759	14.5667	0.52826	139.2	8.459	0.497231	4.48985	1.11473	24.2561	32.5501	17.835	52.7491	0.0134571	5.30336	26.8242	11.2443	4.36084	5.16133	3.4887	17.801	9.92466	1.90249	1.65446	7.43827	15.9935	5.54305	6.22985	6.28095	1.66365	6.99979	469.933	7.57392	14.09	5.9268	9.79186	7.45477	2.20972	26.6916	8.09927
TCGA-CV-7255	0.175342	1	3.8226	22.1231	8.95114	23.7674	22.044	7.04904	32.111	148.525	6.64942	10.0184	1.8499	159.33	10.1618	1.75162	94.0006	1.61265	41.9902	94.8633	5.89741	20.3637	0.00702061	7.17878	140.458	15.8387	3.61836	5.28679	4.74627	17.8626	8.59704	1.52788	0.414545	6.69101	29.5797	4.3761	7.08265	5.00945	5.12238	22.9082	804.204	7.86647	11.7814	5.51161	8.44245	4.90966	0.348079	40.8273	21.6674
TCGA-BA-A6DG	0.189041	1	1.02879	31.9159	5.33823	32.1408	16.0119	6.62679	40.5525	61.0224	8.07057	7.15427	1.72538	178.859	4.33571	1.93451	23.8673	3.54954	83.3471	95.4378	12.9791	2.76371	0.017452	3.14408	42.5966	7.49882	5.21961	3.85119	1.55254	7.61575	9.99143	1.51774	0.730133	4.66727	27.9307	3.88245	5.21064	3.48736	2.77921	19.2938	538.545	6.57614	9.34932	9.84576	7.16071	4.09081	5.00105	33.1637	16.3359
TCGA-D6-6824	0.210959	0	1.80865	24.0646	7.97881	14.6366	19.5302	4.7495	14.7564	70.9455	6.54804	10.013	17.7438	82.8912	7.62181	7.83045	26.8589	2.68795	72.2432	35.7172	7.64901	6.4429	0.0556585	6.27059	49.811	14.6595	6.55043	3.93629	4.30334	13.9757	16.9398	2.89747	2.15922	6.82243	23.3802	9.4534	3.81596	5.64505	35.5674	15.6245	349.404	9.1115	11.032	2.18666	8.82286	10.5054	2.67437	39.8203	18.7612
TCGA-CN-A642	0.224658	1	1.59826	116.125	8.30748	14.0219	24.9705	8.39944	26.2679	189.479	10.674	11.3114	0.352911	163.599	6.03913	1.15284	15.5273	0.804932	144.304	40.7991	14.3286	0.751225	0.0500184	4.69917	40.9676	15.2186	9.72314	6.11719	5.63413	8.64121	10.0893	3.73791	0.695554	8.02182	20.4268	4.49597	6.7827	3.65563	1.98653	17.4442	946.48	15.995	12.0761	4.18049	6.09316	12.0422	0.91574	21.5268	22.8826
TCGA-F7-A50I	0.252055	0	1.44749	36.0349	4.95802	33.2977	16.0696	7.54362	8.00483	185.811	10.7152	7.66059	2.33638	85.3486	5.90718	3.57737	23.4853	3.75912	80.6985	30.0523	11.9558	6.92761	0.0514479	2.44992	56.4039	9.44377	4.28665	5.61707	1.26139	10.0062	11.9544	0.997883	2.33341	5.06985	21.0525	5.95568	4.33764	5.07355	9.1243	17.2118	608.928	9.7638	6.34732	10.6564	5.72082	1.58204	0.741048	29.5436	10.5403
TCGA-CN-6995	0.306849	1	4.14486	23.2666	5.53758	29.7496	35.4969	10.2618	38.2787	86.4868	8.85352	7.5903	0.48926	204.156	8.18718	0.449045	26.3083	2.58063	30.0137	34.3026	3.61735	12.9436	0.0266332	5.06804	21.4436	18.9222	4.74465	4.45417	12.3789	12.8455	13.6365	3.23598	0.899501	10.858	13.7393	5.80729	6.4089	7.108	0.507728	11.007	912.341	12.7014	7.16345	1.6639	5.78854	16.0341	0.566952	32.7161	16.565
TCGA-CV-6962	0.345205	1	3.97807	86.6119	22.3439	11.3752	22.8283	14.2812	8.10231	118.352	8.86397	12.0085	2.4035	196.759	11.7952	2.92057	2.16462	3.56951	50.1804	21.4625	9.8232	52.7262	0.0292016	2.73729	12.8603	19.2394	6.93311	9.17503	5.41312	11.8656	19.2009	2.13471	0.193251	11.3768	18.2239	7.03695	7.03372	1.45047	3.53246	6.50397	626.779	13.9824	10.7924	40.8023	7.92352	13.3905	22.793	17.5806	17.2092
TCGA-CV-6938	0.394521	1	2.88511	39.3727	7.61057	7.71876	16.1412	7.10976	15.2387	90.4003	5.78776	10.9337	0.510466	103.972	7.43604	1.84379	34.5274	2.92754	70.7326	32.6157	4.2268	14.4122	0	4.37889	49.2503	16.045	8.03614	4.31325	6.44446	12.3279	14.8493	1.32759	1.50785	7.25306	15.6162	6.59954	5.40895	3.31057	0.619755	17.2437	692.586	7.09329	12.5728	0.433062	5.66396	14.0069	2.51089	17.1302	12.1848
TCGA-BB-4225	0.4	0	2.82979	37.5346	6.34325	65.373	31.0603	14.9401	6.57967	192.085	12.5443	8.33715	0.449336	70.0904	6.87273	0.942382	1.05304	4.97906	44.9765	22.6857	5.27996	12.6216	0.0211004	4.60693	33.9951	19.1625	8.46975	7.57365	6.01295	14.656	15.2438	1.32309	0.785465	15.7008	12.2092	9.65973	4.60868	5.51555	5.77779	5.01147	519.755	9.2672	10.8805	0.778957	7.01324	28.9178	11.81	34.5384	22.3014
TCGA-CV-7101	0.438356	1	1.81698	45.9355	9.99763	19.0992	14.8699	5.38809	8.98363	84.1599	6.736	10.9335	7.54366	156.298	5.29789	3.27515	2.53691	1.59344	38.4919	17.4736	6.44084	10.0354	0.0271238	3.99702	44.0298	17.6015	4.25785	7.5478	3.06997	17.4742	16.5663	3.37307	1.40815	5.70616	22.2294	5.85673	4.71425	4.9076	9.07553	6.88148	524.198	7.01161	11.3354	4.47304	7.69426	3.61359	3.31138	37.2955	7.91051
TCGA-QK-A8Z8	0.468493	1	2.90586	45.0533	13.6359	15.2763	21.6986	8.80056	6.07818	41.1596	14.0653	18.1027	5.82781	105.798	10.0699	0.290222	4.31495	1.52948	19.1175	24.932	11.5703	2.36255	0.0247031	4.59384	59.7955	8.55382	6.76814	20.545	2.86946	15.3631	12.658	2.63354	4.49923	8.64772	29.582	8.19834	8.53402	4.37537	5.4728	25.945	543.954	20.961	11.612	2.755	7.31705	11.7874	1.6967	140.532	22.2346
TCGA-CV-A6JD	0.49863	1	1.19634	99.7968	8.61602	15.9828	25.0661	8.61767	30.4228	100.287	8.30031	11.7635	0.875283	81.2324	5.41442	2.79053	17.3196	2.24372	72.3801	58.5399	3.98687	3.31226	0.08586	5.16011	118.253	12.7975	7.87625	2.91161	2.96784	4.72441	11.4054	1.45732	0.316758	7.22895	44.8052	3.05007	9.98846	9.01525	3.99778	9.98398	576.363	6.22691	8.62856	4.1553	2.41532	17.6757	1.05707	12.3999	22.1668
TCGA-BB-4217	0.512329	0	5.31668	38.7605	11.9733	32.7702	24.6667	8.52122	9.03275	144.922	14.0335	8.326	1.75125	112.708	6.88458	1.69808	22.5686	1.87869	30.7676	37.1978	11.0262	4.91173	0.0705755	6.56308	17.5187	17.3406	6.46868	8.52668	4.40085	17.3625	10.632	2.31912	0.78226	10.8923	19.9442	6.90924	9.58641	5.9067	4.43817	13.6005	698.744	5.4217	11.0998	2.962	7.01058	3.11339	1.97197	31.6306	15.369
TCGA-C9-A47Z	0.523288	1	2.66287	35.3421	7.42256	18.4609	20.6917	6.51721	13.3268	17.7862	7.90056	7.8603	0.762655	313.068	4.40602	2.56417	4.82655	1.948	56.8506	32.9453	20.0519	13.4898	0	4.52501	50.6614	9.71642	4.53283	9.80805	3.19443	10.9543	4.82676	2.25692	1.68505	3.96621	18.6323	4.85419	4.53029	4.1921	0.494784	21.802	664.56	10.402	13.4707	1.53477	4.89893	5.23306	1.36354	58.3589	15.6582
TCGA-CV-7438	0.531507	1	4.15838	60.2154	7.77742	26.3807	22.1681	7.64531	9.10731	84.0276	9.46233	9.38365	1.16121	133.006	10.1202	2.95362	22.2709	7.67441	57.2565	51.267	5.73401	4.84767	0.0225731	2.89514	93.5637	11.1005	10.5312	3.00854	5.2078	13.0376	8.67272	1.42729	1.23951	4.91518	17.9615	5.08282	5.20535	8.25545	4.87378	17.5501	765.826	7.70101	10.3725	7.0046	8.36318	10.2104	2.82872	22.3767	36.9898
TCGA-HD-A6I0	0.575342	0	0.922414	101.639	4.39689	3.27657	32.6882	7.44972	4.7168	30.1793	8.70182	7.94153	0.275236	33.3616	9.42442	0.157953	11.8463	0.32276	52.1638	36.4475	1.96196	8.43593	0.00800566	4.74936	37.5687	9.51643	5.31889	2.19924	1.02967	3.40673	13.769	1.27474	0.191824	10.9419	13.8065	1.80928	22.2833	4.39409	0.887957	11.2818	422.391	1.92985	6.55902	1.0623	2.09916	7.76647	1.09243	3.14059	11.4449
TCGA-BA-A6DB	0.591781	0	1.00595	32.9974	6.40336	9.91895	16.0713	7.44389	4.6168	21.9548	9.13183	8.68803	2.29687	84.8156	5.82408	1.55393	6.85333	3.88907	38.7315	23.9935	8.13418	7.25863	0.0144392	3.06873	16.0736	8.40873	4.04422	3.37814	1.9616	5.97776	10.8606	1.53478	1.51571	8.80335	16.3403	4.00012	6.36615	5.46338	1.78505	9.38327	492.026	9.21247	9.31352	0.678424	4.85181	9.85633	3.95381	10.5534	16.9226
TCGA-T2-A6X0	0.591781	0	6.63382	88.6184	8.7078	29.8485	17.8765	8.8804	9.20396	468.678	14.9561	12.5523	1.42379	161.889	13.2557	2.80792	1.2667	5.1727	88.7506	26.0881	13.1315	11.3641	0.0191029	3.83472	28.4931	22.3508	10.281	5.7682	7.94676	18.3028	24.7966	2.16493	0.435928	11.1508	15.9225	11.1793	8.37802	2.95217	5.55913	7.96664	351.997	9.39682	18.7099	17.3542	11.4603	0.520368	0.669061	17.2706	24.2911
TCGA-QK-A6IG	0.608219	1	5.00848	30.856	7.11472	15.7199	14.9678	16.7265	31.001	105.582	15.6771	7.55576	1.57693	113.19	6.58171	3.35828	34.9159	1.99935	49.7673	60.3753	7.17115	4.57148	0.0395004	4.00845	23.5065	18.4399	6.57379	7.53142	5.30908	9.20659	13.7064	1.2546	0.216336	9.58019	14.3436	3.29334	9.82601	6.80866	3.86096	9.21052	991.276	5.61552	6.96931	1.74171	3.99335	8.3223	0.704311	8.36602	25.7476
TCGA-D6-A6EM	0.635616	0	2.19028	85.1766	3.70182	3.41843	16.2243	8.02839	29.6077	19.4811	14.1003	7.94416	0.463071	139.293	10.7073	0.222063	21.4944	2.40549	86.2626	26.5649	4.25197	3.32178	0.059665	5.09635	47.8267	8.80101	5.51377	3.78695	4.22069	4.31642	16.3977	1.24395	0.714818	16.7269	14.7141	3.70225	21.4428	3.84969	1.88711	10.394	928.381	5.50113	6.07693	1.40553	2.97323	13.436	0.793821	7.55936	25.0053
TCGA-CV-7099	0.665753	1	3.17912	44.4196	8.28934	19.608	21.5439	5.53554	9.72937	138.898	8.89826	10.5515	2.65363	110.22	6.16359	1.40025	5.02188	1.9463	58.9552	28.838	4.18495	8.69145	0.0606454	4.8731	48.3021	19.8214	8.38524	4.6984	6.11154	15.7862	12.0167	2.7193	1.3682	7.46141	19.3521	6.76341	5.87218	7.74327	7.182	9.62897	665.448	6.52771	8.58818	4.61715	5.23368	14.579	0.446377	19.2163	12.4026
TCGA-CN-5363	0.693151	1	6.72727	70.946	5.22819	16.4023	17.4456	10.0246	6.19344	197.301	7.89518	6.78438	1.10424	188.228	14.239	2.60659	18.2841	0.445541	97.9386	70.4506	3.39251	1.25666	0.00664182	3.73927	83.0821	22.5592	9.52854	5.03663	11.9596	13.8739	20.0408	1.31708	1.39062	4.96165	14.393	7.55367	3.89161	6.74808	2.22157	12.0232	1133.09	13.4746	11.9394	8.80985	10.7847	10.4663	1.34741	60.6218	15.0494
TCGA-BB-A6UO	0.734247	1	1.67544	116.019	7.71332	21.9467	20.4437	5.06839	6.10588	224.012	9.91348	6.92727	0.710397	123.338	5.71824	1.30707	7.96414	3.66465	49.2009	31.9982	6.96372	8.01554	0.00760671	4.23432	37.3655	10.8021	5.6484	6.33093	3.59547	5.62776	9.97191	1.72574	1.03717	5.66972	23.1003	2.78285	9.62882	4.60744	1.25238	15.4501	704.14	5.38087	11.8766	11.3386	3.83029	7.22273	1.38399	14.3912	8.0912
TCGA-BA-4078	0.756164	1	5.73455	39.2575	8.72536	12.2167	33.9168	7.09554	6.26909	9.01322	13.4794	10.988	1.84916	137.202	14.4784	1.68579	4.82702	4.28819	60.2602	44.5759	21.434	9.19706	0.0675904	2.91404	33.0658	15.1484	6.27949	4.78639	3.89199	19.2708	19.6352	2.04008	1.26438	6.5603	18.1695	6.57794	3.64868	3.04931	2.58322	12.4359	184.813	6.10787	9.00255	1.22878	8.81826	1.76057	11.385	43.619	13.171
TCGA-BB-4224	0.761644	0	8.78131	27.5309	3.39802	7.57584	14.6951	10.5437	1.35772	56.1361	18.5903	16.3822	0.303487	101.014	12.569	0.65883	0.508417	1.29716	12.375	16.1915	18.6399	6.72789	0.0809332	3.1939	13.2949	27.1915	8.50568	6.56471	10.1592	16.4998	12.5234	1.73151	3.06514	12.263	10.6383	4.25399	11.5139	9.18977	1.38105	7.7405	441.331	10.4497	18.8758	0.552878	8.4493	7.68135	2.96771	29.9838	5.22548
TCGA-CR-7377	0.764384	1	3.27631	26.2028	9.40464	18.4238	25.2727	7.04044	10.9624	109.051	7.70091	7.50824	2.93746	84.8743	4.80091	3.84294	11.5991	2.31288	65.3257	39.9597	3.50072	3.52758	0.0231574	4.16219	44.2427	14.9274	6.68217	5.31717	4.50492	18.3965	9.8966	2.1443	2.54979	5.55441	27.8897	6.18514	5.29307	5.44117	1.99061	9.59601	579.178	6.16124	10.4808	2.34828	8.03767	9.81953	2.34683	26.1287	18.434
TCGA-CN-6022	0.769863	1	3.53849	104.57	7.20844	53.5755	22.1871	8.45609	56.6339	127.619	12.9426	9.95056	1.90859	106.983	10.2776	1.64513	63.9629	2.96491	60.9332	54.0939	7.03289	13.1953	0.0456064	6.15152	89.6579	18.2943	5.17385	3.93448	8.32209	22.4783	13.6194	3.51065	0.800791	7.65586	31.8871	8.47669	7.16113	3.49937	3.54211	17.3011	892.899	8.10185	13.1334	5.76388	7.02497	13.6274	9.25203	43.4978	43.9168
TCGA-BA-4075	0.775342	1	7.62444	58.6117	6.76321	17.0227	18.1855	15.2875	6.30417	251.732	7.40822	13.4025	0.993674	343.529	7.62696	2.67708	43.3399	2.14226	51.1457	31.6558	6.44404	6.7951	0.072453	5.706	18.2346	4.08457	7.37931	10.1069	15.7042	8.50194	10.1695	2.19719	0.383284	12.3893	18.0499	5.17729	5.88445	8.49707	3.29896	13.2666	935.047	5.92589	21.3194	5.83578	5.34116	12.457	0.683086	38.3808	37.7415
TCGA-QK-A6II	0.778082	1	1.01027	77.074	3.09851	10.6186	26.0084	3.97303	19.3647	132.108	5.23131	5.31266	0.492466	153.339	3.33598	0.17214	2.25285	1.91991	52.1993	43.9364	4.40261	42.8908	0	2.70557	27.6311	5.31832	3.16283	1.8711	1.48326	2.20013	13.6194	0.928813	0.3422	5.22433	13.0843	2.91527	11.3605	1.6945	0.867927	9.96148	725.516	5.21799	3.86434	1.95848	2.44657	6.02576	0.441733	5.62698	12.4887
TCGA-D6-6517	0.8	0	3.69867	61.7046	9.48593	12.8658	38.1441	6.76206	12.1472	102.327	9.08175	7.14208	2.99518	116.518	6.08363	1.78387	13.3912	2.4401	73.6888	91.2543	6.5514	11.7401	0.0208763	6.00291	116.662	13.0659	6.9826	4.34468	7.82696	10.093	10.4605	1.10862	0.593115	6.4479	28.6861	6.37281	7.32464	10.7335	2.90404	23.2562	971.102	6.89344	10.5249	6.23446	7.56827	10.3432	1.41297	97.0215	24.2247
TCGA-CV-6441	0.8	1	3.62781	38.2388	10.977	13.7826	31.4596	8.92661	13.4781	222.872	7.88743	7.2888	3.65131	96.1583	3.0541	0.78064	9.50618	1.92064	35.5607	18.9831	6.3314	0.443972	0.037093	3.77198	95.2636	6.53391	4.75167	6.83614	5.50632	10.0397	22.9805	2.26486	0.546674	4.99105	13.9551	7.08418	5.55896	13.1205	0.253567	8.83673	663.97	21.3733	7.8086	9.64612	8.04209	16.7017	0.269953	18.2897	17.9869
TCGA-CV-6935	0.808219	1	0.799907	105.381	4.67406	22.7975	31.2752	7.49165	12.2805	125.531	4.3247	10.5585	0.832314	132.952	7.34689	1.7688	3.06423	4.18644	58.1388	25.2656	3.52715	28.1224	0.0369689	2.13985	37.0083	8.60071	3.38628	4.81561	2.21398	13.9811	10.7462	1.91429	0.387544	4.69055	14.8611	5.61082	4.25715	5.48295	2.58147	18.1219	336.827	14.0722	16.5184	68.2339	9.52757	0.533142	3.7625	19.2644	11.9973
TCGA-CQ-5332	0.868493	1	5.10143	160.979	10.3713	28.1059	18.7624	7.84204	24.1505	180.196	9.41818	9.06124	2.3191	127.525	10.734	2.20085	2.96659	1.41528	31.0139	23.6975	5.53372	24.5695	0.0291108	3.39561	18.033	16.2913	5.53446	9.90843	6.77461	11.1697	11.023	2.53474	0.481625	6.44844	18.0982	5.3105	5.44635	4.57247	2.07269	22.6097	381.615	14.0799	15.0634	6.03848	9.08556	6.83369	0.979858	20.7579	17.301
TCGA-CV-A6K2	0.868493	1	3.67617	30.522	7.08413	33.8083	18.1822	7.661	14.5856	104.367	8.44121	14.0966	0.800167	134.437	8.12443	1.35814	6.47299	15.8263	65.9775	24.3847	8.72227	15.9447	0.0374847	2.59045	56.5227	11.0622	10.9262	3.79761	6.64724	10.385	18.5687	2.55755	0.363546	4.83448	18.6152	6.89649	4.671	4.73356	1.60676	18.309	515.537	7.95998	12.0622	3.40244	7.71384	14.7072	0.409206	14.1341	18.9009
TCGA-P3-A5QF	0.90411	1	4.88002	64.012	7.66254	5.55134	25.6666	12.5349	13.8224	47.984	11.0691	14.0029	1.01181	144.975	7.84928	0.286145	0.574577	8.27375	43.5652	11.9055	4.7554	3.22552	0.0127626	3.60157	18.4093	10.797	9.07164	6.68068	3.66258	12.1444	9.83724	1.53083	0.331288	19.4849	7.71603	3.29457	10.2544	8.88794	11.6048	4.05913	614.266	11.5524	7.88238	1.09057	6.10731	2.27876	0.377336	9.48064	12.9732
TCGA-CV-6955	0.915068	1	1.59316	38.1186	6.98901	13.3994	22.9728	4.03457	4.53864	18.7164	3.77754	8.84058	9.81695	89.4408	4.77316	0.208829	0.343206	6.65198	11.2672	7.97305	2.80298	8.43376	0.0169553	2.45801	14.3965	9.41368	5.25514	2.61724	3.13938	9.84857	9.10237	0.84769	1.43483	4.54392	11.3077	4.84326	4.22301	7.65186	2.46505	5.56618	520.988	13.1351	7.29607	0.142988	5.67533	11.724	0.37019	14.8441	11.8355
TCGA-CN-6024	0.923288	1	2.12986	125.71	4.93956	66.5901	22.876	6.32935	8.64682	150.687	6.44538	13.1816	1.25661	349.941	5.00691	3.96261	3.85101	2.37811	70.7993	36.6368	4.97359	35.592	0.0175337	2.85033	16.3796	12.8049	5.19647	5.1078	3.87133	16.738	15.8008	1.78513	0.343436	7.53785	20.7482	6.77092	5.70295	6.70706	8.38007	15.9262	510.586	11.7689	6.38984	6.11377	6.86221	2.91658	3.37623	18.943	10.6613
TCGA-BA-A6DA	0.961644	0	0.731657	169.412	2.77113	26.9381	20.8194	6.91546	12.6654	465.232	7.28685	6.7069	0.434352	146.394	2.8915	0.228556	2.47766	3.6171	31.6243	29.1986	2.67083	11.8033	0.0273053	2.13936	8.96224	5.54758	1.66	2.34374	0.358512	2.63146	6.26891	0.585061	0.358288	2.71363	9.99199	1.8519	8.73339	5.56261	4.48507	11.4249	1025	15.3835	5.06132	5.95886	3.21746	0.162512	1.73053	6.91899	9.06187
TCGA-CN-5365	0.961644	1	3.48279	48.3909	7.95396	31.6311	13.4652	7.60921	9.79635	98.6472	6.93521	7.96927	0.344302	186.407	7.94469	0.275084	8.72107	1.62536	29.2327	29.2677	3.37219	9.55777	0	3.82811	34.2917	12.1014	2.90325	4.04239	8.02121	8.65833	10.0701	1.82629	0.940574	8.26837	14.0641	2.53792	7.65152	3.63056	1.84394	20.945	892.16	5.67787	6.398	3.9469	5.4503	10.0472	0.279039	26.7468	12.6503
TCGA-CQ-A4C7	0.967123	1	2.4404	33.5817	7.7899	14.608	15.0161	9.3828	21.5118	189.1	12.0676	8.99286	1.32208	107.042	7.03894	11.7169	11.3246	4.31035	129.314	38.5457	14.3557	3.59964	0.00665756	6.16569	58.7919	20.8366	8.0442	4.12005	6.42747	13.2081	9.55608	1.77053	0.30765	4.98457	24.1904	6.88326	5.48435	5.27132	2.98065	11.6032	591.696	10.2465	11.0825	7.63108	6.8825	5.45587	1.6716	31.6122	13.8593
TCGA-F7-A622	0.983562	1	2.17023	50.7008	3.93531	15.1415	18.7886	8.09117	9.49493	154.515	9.455	13.0916	0.283216	97.6073	5.14063	0.969253	6.17735	2.16562	50.9161	36.4095	4.53842	32.9141	0.0128356	6.63918	29.6265	10.6214	5.77931	3.12697	2.71365	5.42502	8.03184	1.63397	0.490623	14.125	8.42178	3.73453	13.0682	3.30272	1.94643	16.4353	524.348	4.39	7.85256	4.55956	6.78735	4.28391	0.408688	20.613	9.87992
TCGA-CN-5366	0.986301	1	2.80746	30.0268	9.62643	17.9072	22.3306	9.57937	5.09838	66.2779	12.7073	7.1197	1.1659	153.956	6.94116	0.942715	1.92105	2.49669	50.3731	75.5429	4.53839	1.10419	0.012861	5.29467	87.4437	14.7313	4.1816	5.26462	3.61156	14.0679	6.88734	2.08927	1.93946	6.29014	24.5056	3.46914	6.52088	4.76276	2.68705	21.0003	968.7	4.89624	11.5537	2.84428	6.57177	1.20115	1.51708	38.9988	10.1747
TCGA-IQ-A61G	0.986301	0	2.87332	48.4758	11.1296	11.6141	14.6405	9.35562	17.0455	229.851	9.23731	15.3678	0.735062	172.157	8.84071	0.297839	7.18271	1.13703	31.5674	29.7453	8.6917	2.44669	0.00584689	2.96668	36.2098	8.54462	6.23634	7.67093	3.59557	8.55949	11.6132	2.13711	0.263517	13.3581	20.3517	6.22722	9.68733	4.3199	0.69918	11.6158	652.752	9.30398	11.8761	26.7923	5.74917	18.2667	1.19146	28.0583	20.25
TCGA-CV-7253	0.989041	1	1.88913	43.5632	6.53351	17.2566	34.0878	7.03503	22.5208	33.294	9.92343	11.879	0.530083	301.337	2.87185	0.202871	0.286838	2.44733	26.7151	30.8131	4.18091	6.43822	0.0490121	3.80734	72.38	12.58	3.8985	7.18619	5.14914	13.179	8.73145	2.55651	0.271011	5.90441	22.2207	4.90495	3.53446	2.55365	4.8264	12.981	953.556	15.88	8.54863	0.856506	7.59738	3.53669	0.102894	67.2609	23.2859
TCGA-CN-5359	1.03288	1	3.983	26.0354	7.64485	25.8734	24.6589	7.32515	7.47294	39.7141	9.47946	10.934	3.4017	162.133	6.52719	1.9601	8.23384	2.73092	58.1213	30.2616	14.1532	7.58526	0.0349137	5.39927	79.0021	27.22	4.29246	4.47148	10.4475	18.228	10.6053	2.02606	1.78767	7.60227	19.5517	11.9399	4.68887	4.12144	4.55321	12.0943	627.164	6.18034	9.31927	9.97321	10.9772	9.22089	5.54637	35.2651	14.362
TCGA-F7-A624	1.03562	0	5.14863	146.003	4.693	8.78114	20.573	11.1218	52.2189	61.9045	16.8095	11.403	1.84596	177.642	8.7905	1.75577	1.48646	0.0940305	19.9094	70.1657	8.9687	2.10818	0.208158	6.65209	14.1985	9.88133	11.6553	4.50989	14.2231	6.85023	16.5322	1.51138	1.43115	23.3511	15.9357	5.71289	17.6492	3.85205	0.459419	6.93455	1303.24	4.39508	10.4816	8.5595	3.85645	7.69969	0.286476	2.2528	21.7432
TCGA-CV-7097	1.05479	1	5.89101	49.9781	11.2924	30.4473	35.1383	10.7529	8.3743	141.181	6.96321	8.33469	1.32722	195.784	11.2083	2.04901	14.2377	2.19404	82.2752	59.4219	4.36926	7.9391	0.00979731	5.07452	49.6446	11.9758	4.5469	6.78327	11.4197	25.7808	10.9528	1.14429	0.85797	7.48301	26.5977	7.02243	3.79669	2.00988	4.31276	17.2639	849.926	5.07001	9.1403	6.1967	8.88667	7.31122	2.90111	36.447	26.8302
TCGA-HD-8634	1.05479	1	2.92458	51.758	8.92338	10.7655	18.1172	6.12673	6.80042	24.3897	6.9679	6.87957	4.67443	128.75	5.59725	1.96021	13.8683	5.68043	77.3945	16.4588	16.9314	21.9141	0.0141014	4.40116	32.9215	13.4861	3.0311	3.88871	7.75355	13.3777	5.95153	1.84546	1.06595	4.99549	13.9527	4.97197	5.33374	3.21123	2.38277	12.3627	586.772	7.28765	9.86842	3.69138	5.13889	8.66385	0.57086	36.0212	9.53427
TCGA-C9-A480	1.05753	0	1.67809	32.0273	9.55413	22.3719	18.3883	6.46847	5.19911	46.1697	7.29655	10.3624	3.05201	89.5782	5.52524	0.585262	5.09446	1.51275	29.7721	19.4129	21.1452	19.1282	0	3.29132	21.5688	10.4606	2.45164	3.75864	4.49587	11.2188	4.9818	1.24581	2.20117	3.21209	14.9249	5.13322	6.45588	2.65624	2.74148	16.4727	615.975	7.39118	6.21229	1.19113	6.89914	8.44945	7.35325	22.7588	12.5989
TCGA-BB-A6UM	1.07671	0	4.72693	97.0139	8.76306	8.71761	29.4484	11.2504	15.4072	126.115	13.172	12.6153	1.53165	109.265	11.8119	0.279246	0.86934	5.71288	41.5895	15.4948	5.5829	1.85354	0.0429478	3.94423	61.1068	16.631	12.8072	4.60422	6.58979	10.6394	21.0621	1.95774	1.59262	15.682	9.03624	5.79241	8.35901	12.0916	3.5603	13.7309	618.044	13.6786	8.21321	2.00404	7.34333	0.46944	0.268609	9.81461	23.0659
TCGA-CV-7104	1.07671	1	1.6111	24.499	9.73407	36.4312	23.1877	5.54056	8.1066	162.276	6.48266	8.44837	2.03479	135.992	5.6698	2.15891	13.7295	6.21181	51.6959	49.5624	3.67692	3.14876	0.0112175	4.60626	92.109	6.95854	3.26975	4.11102	4.21561	15.5095	9.07756	1.49161	2.17587	5.2515	34.3444	4.45326	5.73968	9.8643	4.76946	18.5764	661.75	5.92052	10.163	2.95383	8.23033	7.32597	1.67359	27.5756	26.5324
TCGA-P3-A6T6	1.08219	1	2.71306	79.8147	6.86122	4.36058	23.1709	11.8077	5.56739	33.9265	14.232	12.5443	0.885475	94.3911	5.49874	1.06998	1.06886	3.03929	25.3644	15.2244	12.3376	0.631303	0.171419	3.94874	20.9997	16.4444	10.2909	6.49952	5.70479	12.4664	26.7652	2.4102	0.0977945	17.0549	12.8982	5.33961	13.657	5.37386	4.52221	5.36293	636.143	10.2344	4.80462	0.359927	8.12387	12.3055	1.50744	13.5665	14.0388
TCGA-CN-4736	1.08219	1	1.86691	25.6335	7.11241	11.6364	19.8728	6.34163	6.83649	32.4398	6.95191	5.93853	1.43685	88.2027	5.61141	1.33866	5.18628	2.54535	60.5871	36.0803	6.5783	23.2828	0.0330725	4.18162	78.04	11.5408	4.76621	4.51272	3.61565	9.76421	14.1855	2.31811	2.64465	6.39813	18.7425	7.04331	5.78143	6.69886	2.23535	7.53031	571.663	7.69989	9.70552	2.52439	7.93589	8.4034	8.92069	18.8046	19.6405
TCGA-CN-4742	1.08767	1	3.09784	36.215	8.62159	15.0969	18.339	9.74699	9.77896	39.5818	5.66926	5.78191	2.97294	94.81	3.48992	1.01957	18.6021	0.385165	54.961	61.3595	2.27995	24.2185	0.0218629	5.19729	82.4546	12.0076	6.29438	3.59565	2.23199	13.7729	9.07996	1.19408	0.426569	4.70926	34.7762	6.08859	5.68207	4.86125	2.48052	9.17378	574.9	5.76276	4.31307	1.91222	7.12336	5.70729	1.32859	29.9731	23.7999
TCGA-D6-6515	1.10411	1	2.65378	44.935	5.51196	16.3124	23.0341	5.53566	10.9183	43.8462	6.47073	8.74807	1.47846	86.1552	7.0741	2.05591	3.63161	2.83807	106.777	32.2375	5.43962	4.61825	0.0313745	4.54099	81.6937	13.3535	8.29369	3.03556	5.16185	13.0328	18.2855	1.64767	3.97958	7.04183	22.604	7.55849	5.61808	4.20134	2.57673	6.68358	573.776	4.78711	9.95413	1.80081	8.14291	14.5147	1.59359	15.2006	17.2729
TCGA-TN-A7HJ	1.10411	0	1.93006	60.0379	6.74235	19.6397	21.7975	9.17891	10.81	71.4791	8.59181	10.2449	7.38847	131.27	6.36823	0.857838	6.39325	4.46328	46.8331	18.9584	9.87255	12.2945	0.0289857	4.7936	41.0111	9.75731	7.19809	3.66195	4.21739	13.2471	14.795	1.97584	0.504359	7.13683	12.5898	4.38959	6.49912	4.02814	7.17092	6.88428	664.573	6.4946	8.09825	1.75475	5.97823	24.1983	0.711958	26.034	14.1658
TCGA-CQ-6225	1.10411	1	2.27392	102.229	11.4941	9.21012	16.6007	10.8168	16.7283	85.8622	10.5534	9.85341	4.90072	178.309	7.01717	0.19506	3.55854	3.91586	14.9566	18.2673	10.1847	29.7781	0	3.15938	18.8584	16.0815	3.5191	6.44946	5.20412	9.77376	12.2218	3.56142	0.209459	6.86575	13.8373	2.68895	7.92654	9.43276	6.36293	4.66652	441.303	21.7264	9.24774	2.60353	10.1483	9.18315	0.951271	31.0553	4.99019
TCGA-KU-A66S	1.11233	1	2.28547	77.7042	19.1055	11.5745	25.2774	9.44885	13.6919	23.6732	11.7794	15.3613	0.931711	80.068	9.57187	3.20113	2.14233	0.527588	22.2759	18.7037	14.2458	9.18266	0.0840011	5.2794	17.86	11.9703	16.2041	5.52224	4.09307	8.19478	20.4139	1.99532	0.449737	13.7019	15.7722	6.4066	10.241	2.99827	5.98742	5.55534	317.821	11.0233	10.9885	2.12853	6.45404	20.2079	1.32849	1.65942	9.48249
TCGA-HD-A633	1.15342	0	3.62154	46.2517	5.65456	13.5859	10.5969	6.64823	24.0914	354.958	10.3338	8.27739	1.1245	111.573	2.94701	0.857433	15.6375	0.825322	84.477	31.9618	7.37221	2.60067	0.0101927	6.17593	31.241	13.4578	8.78028	5.10777	9.50449	10.2739	11.3423	2.55437	0.133744	13.2994	20.9757	3.25942	9.67964	3.22576	1.99021	9.77441	877.708	5.64562	5.66796	5.35478	5.14976	7.40796	0.908703	62.0983	19.9885
TCGA-IQ-A61O	1.15342	1	1.37572	48.6606	6.42869	26.6206	24.2043	4.46735	32.3443	116.393	6.66719	4.83684	1.4875	220.477	3.91764	3.51381	8.24911	4.35039	57.1684	171.208	4.70189	1.23183	0.0707033	3.03515	20.7719	5.01199	4.24224	2.28708	1.68758	4.52034	18.7254	1.4281	0.94325	3.84427	41.3731	1.9032	3.71044	6.05078	3.68857	6.85433	541.094	8.79641	5.35982	15.6861	7.60579	5.23389	5.8086	3.05633	57.6198
TCGA-D6-A6EP	1.16164	0	0.837282	74.7992	5.76802	2.10443	64.5967	9.1835	6.36817	16.2872	11.16	7.54977	7.5072	26.1696	12.044	4.61402	2.74064	0.710402	17.7882	117.013	9.41095	2.73026	0.239836	7.17081	17.32	5.17426	4.22912	2.49476	0.473725	3.4805	28.128	0.656395	0.156374	24.1259	23.5838	1.70761	40.0073	16.645	2.26036	8.77423	228.261	3.17194	3.92133	0.665154	16.2243	6.45009	1.96365	10.3463	21.4215
TCGA-UF-A7JK	1.16164	1	1.65755	50.6282	6.83151	36.0263	19.4694	10.976	3.67751	186.209	8.37169	8.87323	1.24703	89.9206	5.11827	0.981719	4.72068	1.74809	41.4446	59.7375	11.1342	25.2112	0.0142534	4.9451	75.8545	7.01339	7.87991	3.51754	3.1738	11.9737	6.33198	3.82052	0.4635	8.12905	32.9573	3.533	7.93799	5.45412	1.47389	17.1925	641.019	6.54881	14.0658	9.4714	5.44688	8.3037	0.45383	387.885	10.9161
TCGA-DQ-7588	1.16986	1	5.55067	77.8705	8.0174	32.9078	25.6548	9.79568	20.5735	109.841	13.5732	6.36817	0.583566	209.308	5.14067	1.48126	10.2229	0.943432	21.9022	86.2525	5.17865	14.2272	0.00531427	5.43025	68.5812	18.8741	5.01921	3.6834	12.2305	13.0583	11.7094	2.46488	0.436578	13.6188	6.67775	4.12786	10.5375	6.22263	1.89111	9.14998	1692.98	6.74471	11.6058	40.074	5.68993	11.0068	0.212717	42.99	19.8812
TCGA-BA-A6DE	1.20548	0	1.73918	91.3079	19.2215	25.4176	39.0508	13.1916	12.46	15.2427	10.3124	18.9454	0.631026	111.863	6.35303	2.02268	10.7169	0.905868	15.1994	34.7387	6.98316	5.25359	0.015308	3.18157	140.89	15.7874	9.24818	7.13972	7.21104	18.1181	21.9929	1.85652	1.60983	4.58962	15.1466	5.61383	3.26212	3.24168	1.33828	26.4856	757.808	3.48689	6.1884	1.14342	7.47281	9.90276	0.329581	34.1133	18.6159
TCGA-HD-8224	1.22192	1	2.27844	44.2837	10.458	21.6829	19.4235	3.58867	10.7372	36.855	8.26357	8.79419	0.856424	63.7011	8.40946	1.3739	9.3993	17.4723	34.0596	35.3789	10.033	0.685429	0.0175684	4.35815	55.992	14.0608	6.82314	4.34095	2.04777	21.7184	34.0383	2.67562	2.42051	7.57729	24.3364	5.97316	5.56476	6.31913	5.98287	9.5972	658.576	10.1532	13.3048	1.55566	13.6535	7.64907	5.21023	23.4895	32.7471
TCGA-BA-6870	1.23562	1	2.11935	60.997	7.83483	16.3187	18.6615	6.3338	6.81	85.0877	5.84656	12.4484	1.25479	113.049	6.43509	0.709334	6.49182	0.499936	41.9408	25.6589	6.18314	10.4808	0.00843218	5.59876	94.6192	13.0693	6.53598	1.86076	5.50738	10.2183	13.1994	1.16552	0.173181	9.4063	28.1926	4.12151	6.69187	3.04608	1.9436	23.5339	596.388	5.82581	9.26811	3.47207	7.36387	16.1424	5.73784	24.4892	8.29411
TCGA-CV-7424	1.2411	1	1.41999	157.205	9.0828	24.6151	30.6669	7.28591	17.9296	63.3791	7.88765	5.57194	3.12662	130.772	6.86526	1.80887	3.19671	2.45514	61.5078	36.6186	9.6878	18.3363	0.0685266	2.21432	36.301	9.10038	9.5316	3.78913	2.59363	14.937	22.2005	1.72261	0.674381	5.08855	17.2389	2.88773	4.84336	4.27252	3.9554	6.93521	593.402	18.3388	14.5797	19.1886	8.79562	7.98702	4.58718	31.6476	15.8417
TCGA-H7-8502	1.25479	0	5.4169	46.9551	21.2231	20.8976	14.0624	8.73409	26.8783	295.299	16.0421	7.36395	0.489641	140.162	9.71178	1.09053	14.747	2.06557	80.4863	64.9567	8.25609	3.72022	0.0168887	5.3008	58.6389	25.6812	6.71042	9.31215	9.12998	18.5785	7.47593	2.11444	0.549197	7.38314	14.8616	9.0832	6.68193	5.12137	1.51224	20.9672	945.928	5.69503	12.4562	6.70128	8.43034	10.1753	2.23546	47.0537	16.8212
TCGA-BA-4074	1.26575	1	22.7525	188.565	6.30895	5.4432	11.5802	16.3199	7.37763	100.811	9.53386	14.7325	0.59603	461.937	17.7353	1.57483	45.4327	2.01999	24.2497	22.0167	8.48514	3.84571	0.0220826	5.79965	6.50243	4.19337	15.7215	4.90905	14.5561	6.84093	7.13745	1.7182	0.629907	22.5327	9.029	4.07449	12.042	2.96738	2.26562	30.0507	698.431	3.31223	20.6751	2.02721	4.87884	7.13352	0.679005	9.11249	34.7911
TCGA-QK-AA3J	1.27671	0	4.14076	32.4801	24.2725	13.6301	16.7646	11.2214	18.1232	20.1565	10.3075	12.986	2.8998	64.6646	10.5039	1.48541	1.55268	2.94322	32.38	8.94619	9.81378	1.41901	0.0821982	5.36159	64.4371	14.3788	8.81753	6.22675	3.4566	16.4569	18.8444	1.59288	0.213955	11.9695	8.58542	5.01533	5.86528	7.02344	8.22084	12.1275	412.626	12.1866	7.6566	0.91247	11.8992	1.81104	3.32291	13.8041	9.55013
TCGA-MT-A7BN	1.28493	0	1.39948	165.993	2.91599	6.95615	60.6706	5.94973	18.2624	93.549	8.54873	13.7096	0.925518	157.81	4.84241	1.50046	2.2012	1.79946	31.5103	74.9176	7.58232	1.80326	0.143849	7.94282	42.5739	6.19578	1.35142	3.6544	4.10059	1.77086	46.5348	1.0181	0.391393	14.5677	27.5423	1.18071	22.1978	9.54524	3.26647	3.48383	1266.43	6.74832	5.43749	42.2894	3.87933	9.65061	5.32509	7.24201	18.7979
TCGA-BA-6868	1.29315	1	2.52732	50.3522	27.9972	42.6491	12.6467	8.97579	15.0312	204.029	6.45484	8.6593	1.7151	140.395	7.05779	3.52502	44.5425	1.70632	63.2714	46.9288	8.70637	18.3935	0.031698	4.74397	113.247	11.7853	5.48291	1.91698	6.86566	9.8851	12.0118	1.93397	0.136633	4.97893	19.7087	4.11524	4.85464	6.37796	1.74977	14.2152	723.831	10.5655	12.1751	13.5731	8.36284	0.359575	2.35816	37.4288	21.7369
TCGA-CQ-6219	1.31233	1	3.47272	29.2933	8.02633	9.28444	15.9852	6.93909	5.50407	42.3309	10.4821	7.49323	1.25925	199.441	8.36331	1.39774	5.63117	1.42904	37.5537	34.7842	7.23071	1.69815	0.0311293	5.56067	39.1863	23.8873	8.50767	5.12465	9.59239	16.1405	11.2384	1.5912	1.51546	10.7843	20.776	7.19682	9.34244	8.19967	3.32386	16.1563	771.545	6.72369	8.09122	0.859885	5.29296	7.05218	1.4537	21.7413	12.2614
TCGA-T2-A6WZ	1.32603	1	2.32572	114.676	4.19677	16.5448	22.8184	8.21511	4.00256	158.063	9.24662	8.06033	0.808574	90.6753	5.2558	1.43634	1.91123	1.08521	21.0209	37.3172	4.51893	10.1229	0.0387479	3.36309	45.1093	11.4147	4.9216	5.92659	3.04212	3.44279	8.78336	0.754268	1.46635	13.1966	19.0579	2.04588	16.3345	9.44225	1.24606	8.90248	1124.15	5.90772	4.65285	4.18131	2.89751	6.98349	2.23248	8.07485	19.2341
TCGA-IQ-7630	1.32877	0	2.42306	25.0694	9.06767	34.6063	26.2261	8.38169	14.4996	351.163	8.44844	10.6148	0.858739	155.648	9.35412	1.06677	12.2138	0.88954	30.3781	41.6953	8.19745	4.7933	0.00838852	6.00957	87.267	7.44318	6.08551	4.40244	7.30627	13.2244	17.8116	1.6476	0.792027	6.71611	39.6226	8.85914	8.54051	6.30551	1.03703	15.5196	749.295	10.3671	13.6851	8.22918	6.40925	11.3696	3.08682	31.415	22.5698
TCGA-P3-A6T7	1.33425	1	2.64721	54.1508	8.90698	22.2329	16.2309	9.3798	5.49994	168.457	14.6307	7.45009	0.55702	112.798	6.74365	0.509378	2.64807	2.75083	61.0752	39.7794	9.2955	25.3041	0.00548243	3.80417	22.7206	10.4475	3.41929	3.31007	3.40229	9.05292	6.63091	1.16318	1.74527	5.86784	13.4316	4.42562	7.59502	3.87989	2.4387	9.87921	735.697	7.84673	9.42183	3.50721	4.61346	5.85074	2.19448	12.9553	6.24725
TCGA-D6-6825	1.34521	0	3.01364	23.5042	8.92041	25.8053	13.2907	9.81893	7.17269	70.3345	9.33227	11.7732	0.682869	96.7854	7.52267	1.92441	13.2319	4.83313	31.2026	25.918	10.6263	4.45166	0.0103562	4.84291	35.19	16.0575	5.60733	4.70825	4.49964	16.9731	7.76494	2.2712	2.02652	5.54213	25.9565	6.38319	5.23888	4.57965	2.23752	15.1068	594.928	5.98868	11.3782	0.81276	9.11956	8.58648	1.15881	29.3718	10.8796
TCGA-CN-5364	1.35068	1	4.73003	33.743	6.70535	24.3627	29.475	9.54696	10.163	72.7033	10.0228	9.78059	2.0295	130.697	9.23354	0.393639	8.1853	8.66692	66.0233	38.907	5.54916	1.47262	0.00954183	4.78439	38.9671	24.6318	5.9666	4.33945	4.28387	9.49019	11.7109	1.79996	1.94065	8.56645	17.7373	5.94132	5.2144	6.78615	1.57098	10.1123	846.326	10.5735	9.35627	1.54942	6.90588	22.8841	2.08763	32.9366	20.1478
TCGA-BA-A8YP	1.36712	0	5.38702	57.8601	13.1335	14.6751	26.3344	7.28872	11.0154	106.948	16.9314	15.5535	1.98724	99.1506	8.81425	3.06815	6.60957	0.843175	33.9404	41.1266	15.0817	6.06943	0.0182104	4.45119	41.0897	19.2011	10.9423	6.38425	6.12383	15.2692	27.7408	1.95859	0.474433	16.1761	21.5307	2.85634	7.62742	6.07745	0.859128	13.9231	498.94	8.23764	10.8681	7.27743	9.57052	8.02862	13.1978	9.80077	11.3827
TCGA-CV-7437	1.3863	1	2.69653	101.384	7.31005	25.2106	31.3123	10.097	7.96459	80.6168	5.04134	10.564	0.480232	176.39	5.49038	4.62711	0.714715	6.55961	45.719	73.756	3.94805	2.45955	0.0440412	5.0713	68.3245	10.2721	7.61098	4.90757	4.09348	14.2957	16.886	2.74308	0.141331	6.18723	37.2847	7.06364	6.32348	3.51452	3.16754	11.7745	708.817	10.0721	14.0751	24.6835	10.9199	8.28951	0.836359	50.4903	21.9539
TCGA-CR-6477	1.40822	0	7.95099	43.0519	6.9791	21.8955	24.0754	7.77258	11.581	43.2368	5.7136	6.56386	1.32805	204.903	2.75232	2.25551	13.3461	4.44031	40.8079	78.7852	3.40427	9.67958	0.00487401	4.35612	63.0487	20.2198	4.65101	2.85297	7.55004	11.107	13.6946	2.3303	1.99093	7.33107	22.9358	4.68391	5.34404	3.21784	2.81003	12.0976	1154.55	5.25538	5.81914	3.14064	12.5837	5.28624	7.18304	53.484	40.5518
TCGA-RS-A6TP	1.4137	0	5.71554	102.155	8.34087	11.2678	31.1459	9.1778	11.8447	81.4482	8.35588	10.8958	0.199991	155.744	5.93134	0.907956	0.163222	1.89986	48.697	27.3653	7.07192	4.77464	0.0366816	4.97891	75.4641	15.5233	13.7534	5.45919	8.13839	18.9344	23.6874	2.56786	2.56354	12.265	13.8831	11.6692	10.7251	7.88563	2.88986	11.1097	641.844	16.9732	9.57285	10.4167	9.13513	0.100762	0.10011	41.2549	23.3008
TCGA-UP-A6WW	1.41918	0	3.95191	140.773	8.65592	22.9195	65.6408	12.2083	18.5421	197.896	9.64102	13.7818	0.682917	190.514	7.25596	0.638828	1.94382	3.7034	29.5272	36.5675	6.38539	6.58018	0.0284171	2.60309	37.3685	25.2184	13.088	5.09279	6.49514	3.93892	35.7852	2.16492	0.43232	9.94788	18.5026	5.38014	8.06688	3.41077	1.97268	4.95747	1303.47	3.7016	8.06703	5.59747	5.63673	23.5718	0.749695	12.0636	33.1728
TCGA-BA-5555	1.42466	0	4.51894	60.8974	9.33688	18.3876	37.1129	8.65034	6.56122	81.2028	7.55969	15.4174	1.81398	177.887	5.95697	2.90858	2.78762	3.55219	29.1121	59.1771	6.5871	9.93387	0.0185326	8.19692	62.5328	24.4053	7.58992	7.53872	5.72813	32.192	17.193	2.16258	0.391195	12.0207	18.5777	4.99287	9.62769	4.3682	5.23526	11.6123	748.733	8.0567	7.10487	0.722437	10.9899	1.38723	1.12958	37.8408	18.2327
TCGA-CV-7248	1.4274	1	4.52702	55.6706	14.1594	21.8034	20.0735	9.50292	8.27194	48.8496	6.40885	9.24043	3.84247	97.8096	4.30709	2.33882	4.73508	1.32656	40.6514	30.9237	7.27237	9.61847	0.0324365	5.81756	35.2018	19.3326	5.13862	6.97884	4.17191	12.7624	13.5558	1.90786	0.446765	10.3925	23.5592	5.67534	8.15054	4.29305	3.13731	6.93991	620.601	7.77141	12.2719	11.819	7.08089	10.3993	2.622	16.7857	12.5535
TCGA-CR-7383	1.4274	1	4.01342	91.5738	7.61919	16.7661	21.962	10.709	17.0822	18.6655	13.3875	8.24113	1.54208	157.222	10.3329	1.97012	5.40487	1.70938	51.7848	31.9745	5.51098	2.3238	0.0336045	4.44259	40.619	11.1638	5.42529	3.46073	9.43539	10.4738	19.485	2.13589	1.93905	6.10304	23.9669	7.321	5.16334	5.78941	3.51652	7.32622	913.017	2.64419	15.2108	9.46849	6.65753	8.89904	63.6568	8.21867	13.169
TCGA-CN-A49A	1.4411	1	4.15311	103.72	8.87934	20.4961	26.3072	11.1216	18.7875	37.2253	7.53765	10.3292	2.48949	156.68	10.0305	4.33036	4.91908	1.90968	37.9308	89.572	27.9416	20.0169	0.0702194	4.77088	50.4603	26.3943	6.09152	5.09518	8.63121	6.84308	12.6893	1.74862	0.382393	8.81041	15.1638	6.08383	5.10311	6.07321	3.63609	6.39806	661.139	8.28599	7.06516	3.35858	14.4229	6.64584	3.54823	28.5129	11.689
TCGA-QK-A8ZB	1.48493	0	1.58812	36.9938	9.26188	29.0841	23.2186	8.56005	9.8509	107.699	7.58852	9.99799	1.57096	129.212	7.48519	2.26838	4.49998	2.16688	25.8534	26.5433	12.3457	27.827	0.0426391	3.67282	38.0627	7.24799	5.60331	9.5432	3.05056	18.0417	15.6911	2.94505	1.87551	4.6565	11.6591	5.06972	4.80373	5.34129	4.14804	27.0895	668.094	20.317	6.24371	2.91263	8.67515	9.61607	3.61518	31.056	11.0666
TCGA-F7-A620	1.48767	0	3.12821	38.8886	5.71844	9.09583	16.2965	8.51142	4.44723	81.6771	9.31668	6.65528	1.70745	72.7311	6.22832	0.949966	39.0311	2.57644	50.1872	19.7635	8.64471	30.5218	0	5.62176	35.2973	11.9001	3.09335	5.06994	6.26485	10.0632	12.4636	1.17863	1.39593	21.2715	13.787	3.33922	11.801	6.52786	0.55596	13.2199	562.87	7.19268	7.51548	2.51372	3.42083	8.6565	1.26461	15.8758	5.40611
TCGA-CV-5966	1.49315	1	9.31136	67.0196	7.13173	10.1711	18.3034	8.85814	16.8605	12.8246	9.55327	7.42643	1.33429	92.5551	8.26063	0.529825	105.398	0.558524	102.007	69.1519	3.27512	10.3567	0.0520052	7.97103	92.1834	29.8946	7.34225	8.5153	18.8122	14.5143	12.2419	1.28472	0.904905	26.5501	40.602	5.19414	14.5055	3.19857	2.7369	11.3875	964.414	3.02516	7.60586	2.25282	4.19947	19.5306	0.359556	24.5477	16.8568
TCGA-UF-A7JC	1.49589	1	3.68938	38.1212	9.69668	12.2872	23.1015	6.8228	3.71917	100.968	9.0538	7.76286	0.706522	140.9	5.07546	1.35441	8.93348	3.03356	39.4686	37.6528	11.8118	22.041	0.0432978	3.38829	34.423	12.3518	3.2856	4.41267	4.13488	14.9535	4.16611	2.40845	1.44256	6.87509	20.4921	3.89116	7.52539	6.49239	4.60232	22.7795	782.355	5.28708	10.8755	4.73935	5.57143	3.22712	0.307233	28.3818	16.6202
TCGA-CV-5439	1.49589	1	1.16602	41.8734	11.5159	36.5265	13.6333	6.0584	11.2385	157.798	9.6136	8.46308	2.39488	238.506	7.01945	0.893724	0.962217	5.34007	128.834	18.2875	10.3277	83.0012	0.0110727	4.23119	15.7064	21.3271	3.47996	6.81894	4.66853	11.8552	6.62153	3.82625	1.64873	6.02755	22.2784	8.07969	5.1838	3.82753	3.355	28.8381	592.046	15.7299	14.7169	1.56933	6.95464	15.8188	10.5213	31.8458	15.307
TCGA-MZ-A7D7	1.49863	0	10.5999	171.1	7.60197	13.4401	7.12219	9.92515	3.78354	30.7674	6.40719	14.7297	1.46862	205.029	6.36357	3.42233	42.1088	5.93381	17.2074	18.5895	9.00589	5.41098	0.0145651	2.52662	12.5362	4.12353	8.58588	7.3604	7.72748	4.86059	8.09238	1.10146	0.436243	8.13603	25.0749	2.69804	4.37687	4.17862	2.3938	17.3983	569.534	11.8886	11.7892	2.696	4.51927	3.35076	3.42515	11.6961	14.3885
TCGA-DQ-5631	1.50137	1	5.35138	14.3485	11.4507	17.2702	24.9356	8.85237	12.8639	58.4223	4.72735	9.2278	4.82009	223.623	6.87836	4.0866	57.3574	1.68033	74.3704	76.2524	13.184	6.15968	0.0529391	3.8792	136.083	9.38291	10.598	9.50684	5.65193	15.1944	11.3367	1.58886	0.838101	5.71927	56.068	7.32634	5.03281	7.94427	2.71227	14.4066	529.077	4.71285	14.957	4.28452	8.09735	16.9914	0.812695	46.7074	25.2785
TCGA-CX-7086	1.56986	0	4.903	36.3882	12.6791	15.9701	16.7975	8.64158	1.68067	65.0094	7.96581	18.2185	0.67635	59.3329	6.23738	0.615376	2.33383	1.06057	21.0103	20.5372	5.50974	14.914	0.0242292	6.92953	49.3816	20.1125	3.83504	6.34297	6.10018	19.6268	11.3609	2.56929	0.939951	11.2334	17.0606	5.42442	6.58382	5.40251	4.80095	16.9712	508.424	6.5995	12.7464	0.883206	9.83561	0.519136	1.07564	33.8029	7.33624
TCGA-P3-A6T3	1.58082	1	1.96095	51.4615	7.97364	37.1313	13.062	6.93329	11.9051	358.736	7.24466	8.66214	0.67228	161.103	5.27173	5.28853	14.4005	1.632	45.8143	53.0438	11.9913	32.523	0.0132337	3.18972	67.7483	6.608	5.62453	8.97275	1.91485	12.6691	5.16051	1.97654	0.0981481	3.48006	29.5391	4.45553	5.56597	6.88242	1.64367	20.9691	900.263	8.40247	12.3284	3.40616	6.67014	5.49219	0.270877	27.1756	20.1833
TCGA-CV-7247	1.58082	1	5.69422	32.1103	65.5069	7.9684	17.8813	5.77062	14.7223	75.7149	12.1537	9.592	0.420805	124.122	5.19937	1.81916	8.18994	4.71715	72.0897	25.322	4.35539	3.59356	0.00443278	7.17487	59.2719	22.7761	6.85746	6.35896	11.9479	14.9557	10.7333	1.77109	0.849712	9.93429	10.7633	9.2278	7.79184	3.40625	2.95256	9.01975	830.374	3.94852	12.5001	2.82886	7.68637	13.3231	1.47592	42.2318	28.4518
TCGA-P3-A6T0	1.58356	0	2.58396	45.3329	9.89882	31.7456	22.6153	8.90465	26.1342	37.2924	8.25745	9.78303	0.401216	234.682	7.38159	2.76135	25.7853	4.66315	64.1383	43.6102	9.65339	45.8619	0.0179745	3.82958	106.533	13.2789	10.6396	3.26924	3.78203	13.1615	11.3507	1.91056	0.174326	4.95253	31.6951	8.18403	7.71631	2.0816	3.16182	21.6068	663.995	3.44104	14.4681	8.86757	7.39257	7.65306	13.7477	31.2856	37.3522
TCGA-CN-6018	1.58904	1	5.04268	33.4906	6.27745	25.1139	25.9075	9.0184	15.0934	207.358	8.84149	6.15236	1.29097	343.124	10.8764	3.31478	14.1705	3.42919	47.8588	57.7572	7.2035	19.4525	0.0700466	6.20698	37.1491	14.7251	4.27742	4.95513	16.836	17.9452	17.923	3.0753	1.30875	8.62341	15.8425	10.9212	6.44754	2.18137	5.48302	18.6375	685.465	6.95543	5.35925	6.9771	8.28212	9.83978	1.6621	70.6597	19.8146
TCGA-QK-A6VC	1.64384	0	2.41685	48.9748	15.8545	32.8686	23.4232	9.06359	12.9399	439.681	10.5505	10.7244	4.59525	103.986	6.75596	1.11192	1.91368	1.91109	43.1682	20.3248	10.4452	2.23923	0.0715844	2.34251	16.4701	6.60241	9.55864	3.18097	4.06261	9.80719	14.5416	1.7293	0.620753	16.2466	10.8264	7.50549	8.28066	10.6392	3.03121	8.49349	442.583	9.23278	9.67837	1.2123	6.80939	3.74921	0.429803	7.9284	16.1868
TCGA-DQ-7591	1.70411	0	6.9052	44.1494	9.64344	29.9056	43.2762	8.79238	17.8592	86.0529	16.2073	11.7553	0.691265	271.941	17.879	1.30705	0.81362	1.7121	72.0219	13.2965	25.139	3.07508	0.15356	3.296	21.2081	14.6306	7.76316	6.35927	16.1876	10.2146	23.1026	2.48969	1.08711	11.4691	14.0964	12.0786	10.3013	9.06971	4.09274	7.08859	834.597	12.3774	14.7545	8.06912	9.71034	0.655094	6.62286	15.4973	24.3417
TCGA-BA-A4IH	1.70411	0	10.6157	31.4168	7.2656	12.1837	25.3296	12.2442	5.87387	46.696	12.0277	14.5775	2.66831	83.3933	13.7613	6.9475	4.86315	3.95142	51.7744	40.3559	11.2481	16.4635	0.441831	2.02903	40.488	13.7166	18.1346	6.55954	7.51778	21.9766	16.8495	2.91767	0.42334	5.16137	9.57712	18.0726	3.41099	5.18182	5.87053	9.25198	402.776	18.7589	13.5767	6.38751	8.66693	16.395	11.0998	22.3931	19.2765
TCGA-BA-A6DL	1.70685	0	2.7999	35.9383	6.21626	12.4505	18.863	11.727	11.3517	38.0772	11.0908	10.3335	10.4625	52.9186	5.37744	0.266044	3.19089	2.38134	38.6527	9.09466	7.53848	6.44347	0.0221381	3.72348	15.2487	10.181	4.97489	6.64462	5.04072	8.10803	7.86515	2.31825	0.142086	10.6884	10.615	4.09721	6.8003	2.79646	2.98302	10.1583	524.94	6.67838	16.8301	0.817268	5.61403	12.1497	0.412859	18.0693	11.9796
TCGA-WA-A7GZ	1.71233	1	4.53322	47.1942	10.3065	9.08246	16.9043	15.7579	6.28457	103.66	10.6156	8.54049	0.812243	96.953	9.01619	0.894035	1.37519	0.92232	32.7803	49.3872	13.5154	9.31019	0.0561311	5.59737	38.6779	21.6228	3.72016	6.97958	5.22509	7.45444	21.3368	1.59181	0.861416	13.7454	10.4068	4.90685	8.92228	5.21347	1.8937	12.2807	534.376	4.18651	7.6899	7.44246	5.75915	10.1558	2.14467	46.8957	5.84036
TCGA-UF-A7JO	1.72877	1	3.22942	61.6533	7.70203	17.6727	34.6314	9.44457	22.2744	42.3898	9.96479	5.52476	1.72759	164.846	8.01169	1.32986	2.6915	3.36242	43.0958	20.3743	7.63038	46.8858	0.069143	3.24889	34.4732	11.0333	8.61771	4.46679	4.71159	9.30443	12.4231	1.26252	1.45951	6.17366	13.8749	3.81757	8.97882	5.80131	2.6977	7.84136	579.642	4.84358	8.94454	9.03205	4.26649	7.07857	11.3076	5.87648	16.5239
TCGA-CN-A6V6	1.73973	0	3.92221	43.2138	7.31639	16.6588	24.3456	7.53576	7.22123	71.1561	10.215	17.5323	3.25881	107.817	9.04973	1.02385	1.61351	7.89674	61.2674	21.8284	13.2184	4.14911	0.0333811	4.32244	62.4032	18.911	8.99627	4.55988	3.95799	14.4327	21.2122	1.87226	1.26166	12.6082	13.5068	6.10057	5.79988	5.93191	10.8713	10.1809	624.755	8.59134	5.08297	0.461044	8.02751	4.41284	0.425144	12.5473	17.9796
TCGA-H7-A76A	1.74521	0	1.42625	71.8431	4.48881	26.8857	26.1262	6.93446	24.3785	160.877	10.7207	14.3691	1.21778	105.783	5.02823	0.979041	2.12384	5.21757	59.2649	50.3377	8.18291	5.06846	0.0169515	3.95458	61.0654	11.2225	10.6275	4.03755	2.09169	5.10995	20.3346	0.986372	1.17501	8.92961	23.1119	3.22436	8.17202	7.34438	4.32346	10.1264	669.624	6.09456	4.44669	1.7636	6.56026	1.83153	2.69097	6.13893	16.9362
TCGA-CV-A45P	1.75068	0	2.22541	51.4728	8.0183	14.41	19.0504	5.66713	6.34612	62.7786	7.06141	9.6216	1.31222	83.4014	4.06158	0.452369	9.41188	2.95682	37.3387	22.4471	9.40365	27.1318	0.0117305	3.34748	33.6687	11.3271	4.43168	3.72534	2.9845	9.72199	5.82948	1.46125	0.455074	4.36188	10.9536	3.33913	3.95379	2.24208	6.64782	10.2626	527.336	10.6907	9.05225	1.51114	4.68498	11.6754	1.21654	13.3559	8.78425
TCGA-QK-A64Z	1.75616	1	2.27869	36.4713	7.10801	6.61277	20.7329	7.72319	9.09118	37.8867	9.44365	9.95986	0.762812	91.7688	7.25323	0.833244	6.00061	1.61276	82.178	38.368	10.7627	3.08332	0.016396	5.0346	94.9178	16.4407	8.78408	3.31294	4.40654	9.01033	9.58612	2.13771	0.90733	9.28235	33.4907	4.75592	6.71526	4.90175	0.694596	17.9234	519.935	4.71437	10.8703	1.61127	5.15371	7.93678	7.32858	29.1304	9.58474
TCGA-BA-6869	1.76438	0	1.30325	69.8928	6.0734	45.5649	43.5534	6.7247	25.9089	91.6117	8.68759	13.849	4.39867	101.45	7.78794	0.558245	0.655399	2.10174	41.1254	19.7903	4.18966	25.9101	0.0316509	2.0492	46.5996	13.9382	8.44408	15.4692	1.93791	17.6289	16.2432	1.35191	0.17455	6.07011	25.6372	4.04154	4.419	6.57931	7.92018	60.0005	595.35	12.5207	5.3408	7.04066	6.09376	14.476	0.926189	11.7108	21.5468
TCGA-QK-A652	1.76712	0	1.70555	26.6721	6.11582	14.356	19.2485	10.483	6.20677	26.8868	8.42921	9.35293	1.00993	60.6533	5.1681	1.01962	5.53522	5.32908	49.7125	27.6259	10.8128	27.0874	0.0157034	3.7684	57.443	10.9389	7.10036	3.46849	2.04919	8.67367	8.91982	1.22713	1.38264	7.02277	25.0771	4.77705	6.22511	5.45676	2.02298	11.7905	394.379	5.51821	9.01919	1.45402	5.56128	7.35469	1.74285	13.0414	11.1519
TCGA-CV-A6JY	1.76986	0	2.1549	29.819	11.1123	22.4002	12.6203	8.7788	2.67422	60.6487	7.60417	8.62789	0.980928	98.9697	4.73728	0.325802	1.26273	2.87596	15.216	10.4413	9.51332	10.6867	0.0146485	5.62855	15.8392	13.5972	2.89824	3.73446	3.66215	9.35413	6.35659	2.10477	0.827343	5.80269	12.5707	5.58719	5.41321	2.62304	1.4132	10.4692	504.294	14.1599	7.23775	1.85301	5.84684	7.04507	37.3129	17.0305	10.9581
TCGA-QK-A6IH	1.78904	0	1.73158	78.1622	7.00821	5.37049	37.22	12.0574	26.3922	108.947	10.2672	13.6781	0.240194	128.86	2.3299	0.443117	4.36539	0.766501	27.2098	71.152	1.93918	25.5352	0.0130025	7.62224	44.6735	7.69999	5.51568	1.57989	1.10794	4.92588	25.2796	1.90377	0.118687	12.2832	28.886	2.57233	14.9655	2.8142	0.676026	17.4535	1089.38	3.11653	6.99683	1.95361	3.82609	3.4824	0.579603	20.005	21.6312
TCGA-CQ-5325	1.79178	1	3.0943	56.7672	7.04088	11.6419	19.4988	5.45473	14.3776	72.0533	7.13714	7.96896	1.02313	150.677	5.38233	1.46778	7.80663	5.66447	43.6848	28.6947	5.59902	7.72314	0	5.81729	36.7363	14.7064	4.61661	3.49861	4.01535	11.7807	12.0664	2.33418	3.79762	7.13158	16.9249	5.49918	5.45817	5.1744	2.1717	12.8165	645.859	4.50033	11.391	3.15813	7.28652	6.88908	1.03919	18.1082	16.9188
TCGA-F7-8489	1.80274	0	2.07321	35.5716	7.11525	29.1483	22.1941	5.27257	22.5184	84.8552	8.78454	8.63769	1.26362	124.065	6.63271	2.80064	23.5431	10.1799	76.5647	29.379	11.7884	5.42856	0.031073	4.91465	83.3479	12.9297	7.21044	2.88679	4.12143	7.32878	11.0703	1.46539	0.881927	3.72129	23.5617	6.51795	5.18253	6.28379	1.47643	17.9784	552.227	5.49514	9.84685	2.13781	5.72221	13.9378	19.0383	25.8171	15.9491
TCGA-CV-7177	1.81644	1	2.11902	44.309	14.6048	17.1644	26.5879	8.21827	7.58969	23.721	4.4645	6.84797	2.33167	159.173	5.24423	3.07164	2.89501	2.11091	36.8443	31.7827	3.88159	10.1006	0.0276508	3.50909	38.6555	20.1174	6.13867	5.42291	3.5638	11.6408	12.733	1.57603	1.45128	4.77035	30.8338	2.89547	4.51285	5.12352	2.05527	13.352	454.405	8.93166	7.23678	6.89562	8.8257	1.24059	1.9872	22.6464	11.5437
TCGA-CV-6939	1.82466	1	6.84573	28.4523	10.4467	19.6662	31.3652	7.54655	10.1491	73.6686	10.0172	11.5171	6.48216	82.983	11.7372	3.69607	5.47056	1.8893	71.6093	18.277	7.82048	4.17678	0.225579	3.2968	50.6177	27.6585	14.1381	5.88333	8.25704	26.3868	19.9248	1.92631	0.556673	7.43371	20.3207	16.9948	4.19982	7.89487	13.5679	16.6585	387.803	11.3418	10.9949	1.77956	9.07615	13.8989	1.69898	33.047	19.492
TCGA-HD-7831	1.8274	0	1.19347	46.1577	10.1722	18.8904	15.8346	5.04391	11.8609	89.4829	4.33402	5.65207	2.53087	104.379	6.82704	5.30795	16.8565	1.86849	69.5052	85.6629	5.00998	2.80424	0.0196501	3.83049	58.7573	9.09796	4.51177	4.29671	1.95343	8.93584	13.342	1.89328	0.38489	3.29131	32.1189	5.12246	5.44135	6.49673	2.8152	21.0635	346.228	9.4467	9.16763	5.07961	9.25531	5.34675	5.13042	19.1365	15.0188
TCGA-HD-8314	1.83562	0	6.30756	39.5082	9.001	8.81891	36.7916	10.0044	12.0995	30.5711	17.485	8.10591	3.92802	67.8502	8.42008	1.08428	4.89018	4.61088	52.9397	12.8374	14.604	1.72417	0.0328538	3.93625	12.2931	24.9047	6.55368	4.74819	9.05859	13.2091	15.9101	1.86684	1.715	6.17698	11.8473	7.35963	9.49152	6.04282	7.40665	3.96736	199.757	12.8555	9.63642	1.42913	12.9538	2.5946	1.21792	10.1375	21.6985
TCGA-CN-A63V	1.86027	0	2.11121	80.5495	9.10485	24.7048	27.654	5.03479	14.2591	40.8419	7.88087	8.7288	0.923152	116.75	5.90136	1.86309	5.60947	3.45015	20.9438	47.3825	7.19224	8.4421	0.039395	4.10311	27.9192	9.18708	7.45223	2.83835	2.53873	9.25024	14.5555	2.62609	0.16107	6.33456	24.4598	3.34634	5.35545	3.70093	5.0409	11.2176	537.024	11.3859	7.08992	1.5357	6.63145	7.65922	3.3031	29.3703	21.7394
TCGA-UF-A7JS	1.86301	1	1.04019	56.9071	4.29081	6.59752	27.779	7.71493	14.0457	43.7605	10.838	6.95669	0.30142	39.0379	11.4409	0.435183	8.77055	0.31582	23.2313	68.7009	2.07946	3.07743	0.0127697	2.9296	31.0104	7.75808	2.97359	3.03382	0.954652	1.28647	11.6696	0.214597	0.713943	10.2666	9.27211	0.787078	29.0691	10.8067	0.21393	3.86243	666.982	1.33304	2.3517	2.15599	3.05071	9.94445	1.81223	2.684	6.0358
TCGA-D6-A6EN	1.88219	0	1.9557	121.701	3.21346	6.12721	36.4935	6.94231	37.4085	222.482	11.9986	9.26522	0.521435	57.5116	7.42389	1.15479	20.6313	0.701111	40.5202	46.2839	3.08543	8.48692	0.0370866	5.11022	51.6618	9.62842	6.18415	2.67129	3.29726	3.17193	20.2644	1.51761	0.169263	16.2253	16.3581	2.95444	16.0242	5.89597	7.46	8.66807	1076.37	4.93106	7.62955	1.69273	2.14658	20.2763	0.303645	6.28853	17.0705
TCGA-CR-6491	1.89863	0	2.59432	50.4035	8.7915	26.0733	17.3209	7.24135	6.07651	189.694	7.02221	8.29602	0.683324	146.15	2.10266	0.46272	11.9303	2.23987	31.2458	32.8256	3.6441	10.6379	0.0104444	4.00948	25.6262	18.658	5.02579	3.43041	4.54216	13.4705	3.25742	2.73812	1.26023	5.9392	13.0652	2.63386	3.29612	4.71216	0.310731	8.93642	826.01	11.2545	7.14028	8.35859	8.6571	7.57177	0.346803	54.6825	13.5093
TCGA-CV-7415	1.90411	1	3.56612	32.7479	4.29746	20.613	39.1391	12.6025	20.6971	180.215	8.14887	6.25032	0.860406	159.066	5.30832	0.949494	14.9359	1.57931	30.7828	105.022	4.29014	1.45186	0.0131682	3.89522	86.1107	17.9452	6.45444	3.77912	6.81703	9.07449	14.1317	4.04786	1.03673	5.4185	13.2375	4.61677	6.78873	7.41565	1.17657	21.0937	700.364	8.10316	7.94564	7.5401	5.34339	0.616937	4.98343	12.5819	12.6691
TCGA-QK-A6IF	1.92877	0	2.70981	21.8981	6.70043	12.6875	40.7355	9.84677	5.03117	86.303	14.459	9.45965	1.01306	67.3713	16.9489	1.05511	2.10217	5.72288	37.6314	28.012	30.6455	6.88592	0.0604362	4.31691	47.5087	20.5702	3.65775	8.04276	5.2226	20.5226	21.8268	1.54885	1.62051	10.2747	16.6285	8.20449	8.75344	4.45427	5.02751	5.93177	470.505	10.0653	10.008	2.21551	8.22672	13.567	2.60238	29.2537	14.5558
TCGA-CQ-A4C9	1.93699	0	4.07392	71.1527	14.5838	12.8824	20.3969	8.62931	18.3197	93.8863	17.8139	14.147	3.03746	78.1831	4.96837	0.729769	1.88969	2.29565	36.1261	18.6349	9.29482	4.96943	0.038239	6.14628	31.8271	24.0953	7.89567	9.13096	6.14162	11.0073	21.4457	2.26843	0.680639	10.235	21.9131	5.12438	9.46786	9.3599	5.15144	7.65814	315.174	6.70726	10.7591	0.872662	8.28126	2.20233	2.72032	22.3045	8.54903
TCGA-CN-6013	1.99178	1	2.19559	33.5321	16.2638	25.8164	28.8212	5.07223	14.0678	77.0224	7.47792	17.684	0.890703	185.274	5.76618	1.09232	1.21974	1.91472	54.0304	17.2787	16.9578	30.5466	0.0292222	4.17053	72.5046	9.28156	5.39623	2.67294	3.47192	12.0611	13.577	1.91524	1.73048	7.09718	19.8595	6.86762	6.67252	7.93092	1.06015	11.7583	502.055	8.75823	8.12759	0.899244	8.48819	0.551196	4.20559	23.7222	5.71484
TCGA-UF-A7JD	2.02466	1	2.92578	76.2593	12.8677	37.1797	18.813	8.86641	22.9125	102.706	10.7007	10.2856	2.8064	151.331	5.76036	5.11899	12.6014	1.18416	66.2888	73.7294	15.4189	2.55318	0.0577723	2.72399	46.5701	7.4373	7.35369	9.29277	6.05281	17.0009	11.5084	2.29369	0.494388	7.49939	36.6235	5.50723	6.32319	12.3315	3.18169	13.0175	533.643	7.3733	11.9716	7.58649	12.2591	9.78627	3.08332	46.6017	22.1376
TCGA-F7-A61V	2.07945	0	3.05536	67.0078	6.35255	6.74202	11.6114	9.22822	7.27177	58.8049	9.81677	8.22229	4.46967	90.5989	6.62783	0.551847	3.28717	1.73955	33.5266	17.1384	7.93688	7.67812	0.0134942	4.09292	41.7649	12.685	10.174	6.00247	3.50373	7.30002	6.05887	1.16504	0.365676	9.93367	17.4488	2.30738	4.68915	3.76633	1.64094	6.95101	665.384	12.3397	5.15814	0.89878	4.77999	7.75946	3.91601	10.6467	10.1885
TCGA-CV-7416	2.09041	1	3.66245	26.4763	9.31674	25.7146	20.7632	6.06441	13.2859	126.751	6.8654	7.8539	1.35619	221.689	4.11041	1.92579	13.5687	4.59968	51.477	38.0788	10.0188	19.4554	0.018322	4.63534	91.9286	13.3825	4.90052	3.40021	5.571	14.1226	12.0349	2.91355	1.59665	4.51123	37.5638	7.29189	4.32071	4.10817	1.61412	15.2505	541.935	5.41392	12.9167	4.03232	6.40117	9.07603	4.53782	43.7241	19.163
TCGA-CN-A498	2.11781	1	3.88295	81.8572	8.50719	41.0657	34.4926	6.06076	18.1347	76.5162	7.87827	10.0844	1.0353	169.989	6.9222	1.01541	7.30643	10.1085	69.1488	61.6275	5.27751	29.2205	0.0356047	3.96725	85.9524	10.0684	5.51767	4.4086	5.12797	12.1652	10.2814	1.8773	1.28646	3.82667	17.1815	6.26506	4.82642	4.61072	3.22924	26.2324	648.036	15.2055	7.54859	1.48292	9.82863	8.6393	1.29561	36.0735	14.0839
TCGA-BB-A5HU	2.14247	0	1.61666	65.2414	9.3123	30.7237	24.9457	6.59644	25.571	156.023	8.16927	11.2515	0.870731	122.296	7.92602	2.08125	30.4525	5.27259	45.3701	42.822	8.90774	15.5191	0.0377084	3.39292	43.249	10.0027	6.25451	10.5833	3.1828	11.1536	11.6731	2.57327	0.574697	3.41065	28.8232	7.82948	5.4814	4.21911	1.71469	22.9717	807.912	11.5466	12.0258	6.98123	11.2111	1.1542	1.7299	240.613	27.2041
TCGA-CV-7418	2.16164	1	2.4552	94.0951	9.38158	18.8983	22.7906	6.21036	15.4905	87.6896	10.3801	7.4398	3.51171	147.448	16.7524	5.18115	3.57356	1.32415	47.6836	17.6137	8.54179	5.68372	0.036237	2.57563	25.9039	15.7212	5.2602	6.50414	7.4322	14.3148	24.5605	3.59293	0.587711	10.8472	17.3256	5.30075	8.607	2.01515	5.59827	10.7209	504.153	7.84648	7.47804	16.7453	15.0318	0.393421	4.634	14.9991	9.27083
TCGA-CR-5250	2.18904	0	3.25005	27.8281	8.44996	29.631	27.5395	7.74138	10.9938	53.9887	9.42365	11.2869	2.11157	78.2104	12.5612	1.46512	0.92584	4.57331	59.9704	19.2009	12.0101	4.31982	0.0308473	4.33733	91.76	26.9534	8.98148	4.77341	5.17264	21.8153	23.5738	2.15134	0.323811	7.06818	18.6846	11.0358	4.8174	9.55834	9.37338	11.1907	527.296	11.8002	8.94535	0.697603	11.2639	17.9751	0.909219	58.9505	18.7804
TCGA-CV-6940	2.20274	1	3.34704	87.1317	8.94196	21.6944	34.0258	10.5612	13.679	20.1039	10.7753	9.82506	1.57471	177.384	8.06947	0.750221	7.07254	16.2268	35.1545	31.7031	7.29716	2.09162	0.0284147	4.27125	70.262	17.3212	8.00485	3.48431	3.40339	15.7414	10.8146	1.68085	0.784595	6.02534	28.1707	4.31254	4.60895	3.00418	4.96385	8.30806	844.323	5.72171	10.3178	1.54046	5.1906	8.19038	12.1802	28.3593	16.1344
TCGA-CN-4730	2.23836	0	6.97291	28.3286	10.6321	15.1377	27.5527	12.8412	14.4675	32.8766	8.77263	6.52091	0.745947	130.79	5.35767	0.261665	8.33609	0.415932	23.5152	25.8515	3.45527	20.2786	0.020547	9.40603	38.0936	21.7343	4.15728	14.1236	5.92133	17.0855	3.50133	2.61778	0.246164	11.6066	10.6638	5.09982	6.41287	5.09896	1.07125	11.634	848.741	6.04669	19.4229	1.81676	7.66989	6.78939	0.719642	32.5668	10.6417
TCGA-CR-7388	2.25479	1	2.99701	49.6857	17.5725	22.8612	18.0965	7.40972	10.5905	35.4358	6.77935	11.2922	3.99202	128.557	7.9789	2.76999	4.2909	1.63082	31.9316	22.0058	12.7222	8.86762	0.107705	4.39035	31.6087	14.4191	7.46076	7.25814	4.56877	20.4668	11.9249	2.03974	1.44162	6.43897	20.8526	8.73063	4.79674	5.1344	3.85286	8.57341	841.247	13.747	9.02078	3.72589	11.1196	9.86575	3.12787	23.4956	13.9273
TCGA-QK-A6V9	2.28219	0	6.58463	55.8807	5.46497	30.3304	35.8132	19.941	12.9212	40.9549	12.5821	8.7347	0.805816	253.64	15.6829	2.50717	0.417565	9.30376	38.5543	31.3988	15.8927	1.58885	0.0172568	3.10489	28.9532	17.9648	10.1726	5.4144	5.8864	19.2023	22.9509	1.77628	0.879491	9.53849	9.43555	9.22973	5.8198	2.35564	5.44312	9.18974	674.668	6.24583	11.9836	1.23552	10.4548	0.597808	0.120358	27.4794	12.0326
TCGA-HD-7832	2.29041	0	4.81086	50.3062	10.5304	18.4254	27.9082	7.99834	42.6345	97.3439	16.4893	8.70609	0.560341	186.616	9.97582	0.457867	23.2158	1.36293	50.3093	39.5376	5.61725	13.599	0.0330907	5.9482	99.9218	58.232	6.166	3.84734	20.9002	19.8657	12.2331	2.40114	0.943913	9.80241	15.1491	11.3415	7.37154	2.2671	0.983114	14.4674	983.42	5.22699	13.0247	4.12	6.14944	11.8275	0.18492	37.4427	12.0095
TCGA-BA-A4IG	2.34247	0	8.47153	87.6145	13.5073	15.6384	17.9486	10.1694	8.23258	74.8077	14.1266	16.6046	1.46376	229.894	11.6369	3.02847	5.23879	6.06858	30.1524	31.3552	8.7023	62.5502	0.0425759	4.95232	34.5925	20.2088	6.89348	14.3327	10.8787	19.4007	19.8372	1.76319	0.57601	11.4406	5.78473	9.24726	7.42391	8.66088	4.2972	10.6368	876.393	19.5952	9.13585	2.56884	9.27069	5.92282	1.99193	14.3193	21.5357
TCGA-CV-6960	2.36164	1	3.72207	43.5414	35.8899	16.7202	31.6666	11.8852	10.3257	123.514	10.1399	13.5764	1.39118	121.132	9.18804	3.18723	32.7829	1.02516	30.3213	71.5226	5.68089	7.00112	0.0253851	6.02745	89.1625	16.7768	8.65602	8.12149	4.93419	7.73347	7.81051	1.75333	1.10065	9.15008	26.5232	5.90526	7.44572	5.49026	1.6659	38.3746	649.109	3.4589	16.9941	11.6912	8.39916	8.01672	2.55411	592.126	35.5954
TCGA-HD-7753	2.3726	0	1.77548	55.7039	9.67588	22.2296	15.4239	8.16746	7.15232	29.0111	8.34425	8.83764	0.465164	153.345	4.26891	1.60701	28.3767	3.94574	46.2408	67.0607	4.48829	16.9349	0.0203253	3.86772	52.8463	9.81316	8.59224	4.4865	4.95392	18.4673	13.8091	3.07927	1.56309	3.37037	34.591	5.29401	4.62216	3.18699	2.49864	11.5206	611.043	3.27759	6.38347	2.77261	8.07519	11.2148	1.60496	43.852	7.62908
TCGA-CR-7373	2.43562	0	4.51958	14.1609	11.288	17.4225	17.9988	6.10818	21.5517	102.691	10.9815	9.05283	0.871518	130.476	5.28899	1.17828	57.3629	3.36153	116.865	23.4299	8.00265	26.1825	0.0146415	4.58861	39.199	24.2507	3.50482	4.68959	7.79156	17.3395	10.6646	1.76543	1.71793	7.35717	24.0791	10.9685	6.26849	3.59829	2.41059	17.976	518.482	2.32952	8.53645	3.27334	7.64985	15.0486	0.523905	38.9616	33.1793
TCGA-CQ-A4CB	2.44658	0	5.2611	32.7364	9.34081	23.6137	18.7591	11.9018	6.25849	95.2782	12.6789	12.2729	1.28056	116.09	9.86465	0.902337	74.8548	1.27493	42.9453	75.4625	9.00736	10.2529	0.026408	6.19321	54.4995	15.5971	7.37502	6.13448	6.46935	18.1798	12.3333	1.65035	0.779655	10.284	17.014	13.5597	7.90509	5.03201	2.54006	19.7541	840.231	3.6273	9.76231	4.10412	7.82526	9.11596	3.46544	35.9594	15.2452
TCGA-UF-A7JH	2.45479	0	1.40441	89.7869	4.44002	22.6684	22.0606	7.60124	5.5411	416.717	11.6072	10.7373	0.554067	169.408	3.23754	0.588345	3.38947	1.83502	16.1647	27.3671	7.83884	5.71499	0.0291829	4.4319	24.3771	8.76151	4.47654	3.55208	3.8332	8.93333	12.2357	3.26377	1.30527	9.73692	10.4785	2.43311	9.35197	3.51708	2.40741	16.5946	626.657	10.7467	10.4814	3.59514	4.56288	11.4126	1.61944	103.507	15.0264
TCGA-CN-A49B	2.47671	0	3.14571	79.8013	17.146	29.967	14.2398	8.75092	18.0911	298.602	11.953	16.6872	0.761814	135.03	10.9283	1.34264	40.5315	3.58639	50.5037	19.503	7.527	4.30315	0.0124758	4.04305	74.0926	16.595	5.65794	4.76424	9.29673	9.98621	23.5338	2.28528	2.34877	8.78698	11.7998	7.06538	6.91184	6.56597	3.96032	25.6458	701.622	8.51247	10.6585	7.17905	5.07049	9.86695	1.58325	19.05	9.23622
TCGA-CR-7402	2.49589	0	6.21767	40.6525	7.54913	27.6218	36.3603	4.15758	10.9566	79.3897	5.85888	13.9888	2.91445	119.446	8.75443	2.33017	2.01969	6.53055	54.5046	35.9237	7.91631	5.46658	0.0199007	6.78397	56.3638	19.8553	5.65819	19.1355	7.03888	36.6957	11.1862	1.15715	1.15805	10.8665	15.8426	8.38051	6.69605	5.19965	5.09752	24.4403	796.938	10.0784	6.42532	1.23507	9.23037	10.9477	1.079	21.5651	27.6373
TCGA-CR-7391	2.50137	0	1.41375	20.4139	6.41017	13.9837	17.8932	5.14511	4.8956	17.1807	3.87159	6.02221	7.42106	83.3345	4.16269	2.00911	6.54698	4.76138	31.3245	17.688	5.42809	5.64566	0.0314053	3.48829	24.6877	11.0043	3.5969	3.41145	1.7714	10.9199	8.29713	1.43158	1.97682	3.57698	12.6935	5.26597	3.58915	5.74585	4.37839	6.93963	344.364	12.8441	7.83854	0.543208	8.13567	8.49022	1.19518	17.0032	9.21995
TCGA-CR-7395	2.54795	0	2.44894	33.1934	10.4133	17.5265	24.5241	4.9932	11.8915	38.3173	5.29562	6.20515	1.17713	119.716	4.62595	1.16062	10.194	1.3655	85.4946	25.8569	3.99924	7.0999	0.00913941	2.8364	54.5388	12.2738	5.67031	4.00055	4.21708	11.4997	10.4817	1.2556	0.865532	5.29662	12.9284	7.19596	5.33381	3.22329	1.81623	18.4837	663.018	5.89389	8.92473	1.06646	7.14939	5.99179	3.26752	20.1489	15.208
TCGA-F7-A50J	2.59452	0	1.64619	40.3388	9.01228	12.875	10.1305	10.6547	3.32163	97.5814	9.23251	7.37951	1.45557	131.05	3.56746	1.97453	8.44807	3.05239	38.8457	23.7191	13.2063	37.7595	0.00734874	4.28724	31.6827	5.81213	3.39856	3.32765	2.95369	8.40599	10.3094	1.62399	0.687565	9.01008	14.5204	4.67561	5.97699	3.2211	1.575	18.4725	524.767	5.1782	6.06042	4.62904	3.62545	8.74073	9.20564	237.695	8.86283
TCGA-CQ-A4CI	2.60274	0	4.01461	128.521	10.6107	31.5468	13.9432	7.75907	13.5486	107.436	7.90761	15.7673	1.19806	96.9649	14.0741	1.82963	2.99786	1.95848	55.8623	16.2545	12.2352	8.95345	0.106126	3.67273	24.2979	23.5937	4.70671	7.29507	9.25369	17.839	22.1071	1.59463	0.480798	6.85932	27.3426	3.79812	7.01131	4.11174	2.85982	4.90364	418.668	19.1945	20.1501	16.0871	6.8871	8.5141	9.75101	12.5421	4.05663
TCGA-CN-A63U	2.6411	0	3.53679	63.2322	5.18661	18.8869	18.594	9.33912	36.1996	181.529	15.5569	8.92507	0.512822	61.3676	14.0474	4.61692	0.714579	1.24286	69.1924	45.8464	7.64986	1.93566	0.0304691	2.86897	13.5403	9.00621	12.4239	18.6021	4.27158	8.31987	15.1127	1.69229	0.097343	22.0469	11.4722	3.21079	12.3448	5.65996	4.67148	13.0783	403.154	10.8855	10.3904	1.17674	3.95915	37.9284	0.60426	3.35455	8.99931
TCGA-CN-6989	2.68493	1	4.09673	51.0658	9.67145	22.9855	23.3312	6.78342	20.5136	44.3575	7.76102	6.21235	2.56182	124.511	8.25819	3.22553	18.6811	1.64436	47.1528	38.6673	8.88831	10.7696	0.0252571	3.8511	22.2922	16.9977	3.59192	5.02969	5.31605	35.7247	21.9034	1.4449	2.00528	6.9168	24.2939	6.54227	5.2162	3.52964	2.40017	12.6418	455.615	5.75022	9.42381	11.1933	7.79797	4.22828	3.43503	11.7528	12.4983
TCGA-CQ-6220	2.69863	1	2.57097	39.4633	5.96572	15.5795	13.0605	9.05395	7.83784	157.724	9.68883	6.97985	0.852856	201.886	8.23618	0.342884	8.12066	2.51638	44.3226	26.9822	7.76632	50.1367	0	5.98959	42.0151	17.0396	2.10174	4.20687	6.06852	13.19	4.57923	2.04111	2.56673	9.25913	15.094	5.82238	7.88307	7.94395	1.67761	18.5456	782.133	6.69406	10.6377	1.5214	4.28059	7.44474	2.22091	27.3417	10.7617
TCGA-T2-A6X2	2.70411	0	1.52686	45.4818	8.00452	8.96604	23.5727	6.61682	5.88903	227.612	7.03651	6.92468	0.699206	94.4	3.89787	0.58794	9.82353	2.27917	47.3304	21.059	9.22721	35.0444	0.00952876	4.05026	34.476	11.1245	3.36713	5.52871	2.56603	10.2297	7.48438	1.49324	0.608851	3.63895	23.6532	6.30262	5.8706	1.95108	0.704596	13.3365	599.011	5.84394	6.07774	1.08237	4.67781	10.9062	0.632799	35.2176	13.6518
TCGA-CN-6997	2.70685	1	3.3106	45.251	12.2399	69.3509	25.5608	10.3239	18.1252	196.987	11.1029	11.1452	0.796556	168.246	13.8058	4.14303	5.38431	1.05991	35.929	40.4567	15.3089	5.27738	0.127045	4.02048	14.2254	20.1179	4.4544	3.95268	6.92225	13.6344	12.7566	1.693	0.375986	14.3703	13.2068	6.22552	7.51297	7.74897	6.66723	16.1441	497.987	12.5125	7.16172	6.7051	9.00283	7.75395	12.5038	609.862	11.2655
TCGA-CR-7393	2.72055	0	1.55866	20.5623	6.20422	15.3491	23.5122	3.16777	3.9838	13.9113	3.99286	6.2941	7.09578	68.2794	5.65492	2.43987	7.3072	3.613	36.2816	20.4219	5.39695	4.08937	0.0150307	3.06223	32.4496	13.6592	3.08399	3.57779	2.00571	12.6582	9.07183	1.56293	1.97654	3.87708	14.2163	7.15748	2.63334	5.58773	4.02026	9.20283	357.664	9.306	9.46552	0.896353	9.96248	9.62359	0.895628	21.2853	12.9823
TCGA-F7-8298	2.72603	0	8.02495	58.9294	10.862	43.5535	26.7599	7.98039	19.3271	400.895	11.0295	12.47	0.825587	187.104	10.9213	1.509	23.4639	3.20962	72.1564	105.256	8.83138	1.97372	0.00898829	3.25125	152.721	16.1629	8.26969	5.48374	8.87994	20.676	23.2669	2.29218	0.974288	6.53388	24.8342	7.73225	5.98605	4.7235	4.61088	19.5662	1045.93	10.8398	4.97399	7.84299	6.52926	7.82678	2.59205	36.7901	38.709
TCGA-CN-4731	2.73425	1	4.29256	50.5493	3.02491	40.9342	40.2585	7.47372	24.2374	166.984	6.19052	9.0381	8.90821	198.207	4.91673	1.068	57.7212	3.27764	33.6081	36.6252	4.09047	2.78481	0	3.4906	80.2584	13.0268	6.45801	4.28127	2.06546	11.2897	8.88968	4.39774	0.277238	3.81717	10.8771	2.21007	3.29224	5.48806	3.23969	26.1027	1116.88	15.2832	10.3018	6.48322	8.14493	9.00917	0.706315	78.9215	30.1523
TCGA-CQ-6221	2.73973	0	2.24451	49.9692	3.29415	17.6877	23.5939	5.66908	9.85436	13.5405	3.69343	4.95955	1.5116	69.5375	5.01431	3.48295	18.0542	0.622914	47.4987	95.3218	3.18414	10.5167	0.145286	6.44132	23.7179	7.84774	3.42641	2.86444	2.1143	4.85	13.4847	2.34264	1.1261	4.1621	26.9339	4.43263	6.6381	5.23823	5.4352	15.0224	307.128	5.80443	7.79059	3.52565	11.7838	1.97251	9.11969	3.43661	28.9895
TCGA-HD-7229	2.8137	0	3.29522	31.724	4.18766	27.9628	14.3441	4.81243	25.6729	144.842	8.23403	9.77543	1.78289	155.825	3.1025	1.32897	79.9157	3.50727	90.8655	59.3684	7.2737	1.32828	0.0164408	5.34919	145.684	16.7271	5.41694	3.86463	8.85921	15.9104	10.5462	2.47741	0.916064	3.9746	35.9945	6.8501	4.38099	4.28369	3.30202	66.7111	634.054	6.85001	7.55713	0.800766	7.29134	6.88464	2.27339	105.431	16.0677
TCGA-CN-6019	2.84384	0	0.39838	31.3249	5.6833	19.7929	21.598	4.00292	12.1717	30.0586	5.60343	7.48198	3.98331	82.5967	4.48037	3.10329	6.19888	2.17305	56.8756	39.3988	4.5948	13.3509	0.0328927	3.28235	24.6221	9.22556	3.18162	2.84384	0.59757	8.81249	19.5266	1.5671	1.51248	3.6362	22.9281	3.61877	4.27433	4.2305	4.19558	7.76925	235.28	8.85078	8.55154	2.1059	7.83577	3.9093	4.1234	15.213	10.565
TCGA-CX-7219	2.86301	0	4.38096	27.6803	19.816	20.558	17.8104	6.38314	9.44322	38.1862	7.52496	10.5744	5.57873	94.6831	9.2519	6.88962	19.6012	0.904753	74.672	32.8361	9.7458	17.7609	0.0220703	3.80837	48.7671	18.8536	4.05398	4.44794	7.8098	19.2653	11.1113	1.29072	1.00729	5.41935	15.3577	8.88751	5.55161	6.49506	4.28902	25.09	536.957	9.51283	14.2119	3.83566	9.6408	6.88099	1.52591	47.8312	9.44504
TCGA-CR-6472	2.87671	0	5.76762	54.5996	13.9232	7.44917	20.0031	9.88308	14.0091	10.1438	13.4621	23.3196	3.01478	95.4894	16.2091	4.21046	2.00876	2.32073	53.3492	15.8698	5.82685	0.81506	0.0397868	4.74124	9.73766	17.8655	9.91276	8.14935	5.93287	18.9211	13.3759	2.21204	0.139974	19.9147	11.5108	8.20076	8.9094	5.47239	76.7909	7.65512	242.357	12.3463	4.28316	0.845674	18.3954	2.58353	0.500695	12.1538	11.7062
TCGA-CN-A497	2.91781	0	3.19162	56.7223	9.66352	30.9457	29.6154	6.01477	16.5235	92.6471	7.64225	9.30258	0.984329	73.676	12.118	5.4971	2.06029	1.37788	23.7359	30.7369	13.6013	3.9687	0.0817863	5.40503	51.4338	16.7841	4.95193	42.9554	5.12212	12.7299	15.8344	1.68993	0.572635	17.2357	21.589	9.58925	14.7083	11.1777	3.04958	15.9944	536.094	18.6839	15.1822	1.66992	5.80897	10.3038	0.710206	14.3878	19.3719
TCGA-CN-6992	2.92055	0	2.56285	86.5118	11.9616	19.0501	24.0809	8.93636	6.63576	58.5437	7.5282	6.21101	5.38327	138.497	10.2567	1.46921	1.85475	0.947069	31.5292	23.3334	10.154	16.5283	0.0406309	4.08029	28.8947	21.3099	7.70147	7.48205	2.68479	16.5013	7.2168	2.29766	0.607316	9.56176	21.9906	5.04639	9.0937	3.76116	2.4716	10.2469	343.286	9.38151	13.2644	12.564	11.0721	8.21637	5.11564	20.132	6.66041
TCGA-CR-7369	2.9863	1	6.13679	29.0725	8.61241	15.9328	13.4638	10.8832	9.81511	40.9753	8.38766	10.9196	1.68204	121.7	11.3399	2.05999	5.54359	8.65124	71.9475	30.8088	5.69176	3.22079	0.0240673	3.94294	38.4581	20.9592	7.21905	7.26978	3.63719	25.0622	14.4248	1.83825	0.428389	7.94947	15.802	7.44581	3.88144	4.1597	3.76226	11.74	538.048	6.75042	11.6623	3.5266	9.69741	8.24624	1.0991	31.4336	12.4035
TCGA-CV-7446	2.99452	1	2.59542	12.9146	10.2278	15.2837	12.5488	10.4134	3.70327	13.3066	7.26654	9.41942	3.16076	148.461	7.48686	6.63631	3.48014	1.73934	36.1418	19.877	13.3246	6.32553	0.0867561	3.41899	33.0261	8.63065	11.7008	5.47523	2.68293	32.6819	6.12382	2.10546	0.745328	4.51325	15.855	10.2888	1.81778	3.48444	3.28125	15.1996	347.006	26.062	24.2569	8.72951	10.036	0.771011	9.6426	44.5573	6.97196
TCGA-CV-7242	3	0	1.5076	51.2578	5.29848	23.9822	19.8643	7.65262	16.9261	141.23	7.37026	10.022	10.9171	91.317	5.20802	2.39635	4.26994	2.20502	41.6418	34.6728	9.94319	5.1791	0.481577	3.18099	52.0207	16.1388	9.75985	5.32574	1.58681	14.4182	13.0455	1.41828	0.282901	6.7325	25.2896	4.70852	6.47817	10.8284	5.53924	35.0868	527.458	19.2581	8.21133	2.87791	6.59849	5.04038	19.5973	155.661	11.3977
TCGA-F7-7848	3.09863	0	4.42234	31.8798	10.1919	39.9668	35.7766	8.23635	8.5665	81.0943	10.8079	16.3827	2.50568	75.8021	8.30023	1.05623	2.46071	1.09028	34.7885	29.7392	9.13054	2.28394	0.00558703	4.11266	36.5575	10.9107	6.17753	9.41803	4.51815	21.3623	13.1473	3.86832	0.51636	5.92365	15.0373	5.92084	4.9201	7.6251	4.60573	25.602	455.351	17.6889	12.0158	1.20003	9.88858	12.2061	1.38247	40.9876	11.8382
TCGA-IQ-A61E	3.14247	0	4.4363	43.1926	9.3707	30.4838	16.0728	8.28861	8.8776	179.982	11.5339	7.69995	0.787693	154.291	4.77393	2.19154	18.2755	4.26161	63.7974	59.4159	7.70152	17.5608	0.0186444	3.39827	80.3671	11.3541	10.272	4.05805	6.8443	14.27	16.6638	1.67889	1.34731	7.53651	26.4255	5.92709	6.58338	5.76748	2.30133	28.1967	847.682	4.69929	8.62028	6.47539	6.22259	10.7039	0.633216	23.8297	20.6396
TCGA-CR-5249	3.15616	0	4.23394	49.258	6.83211	48.1518	31.2068	7.42302	12.4222	71.9873	10.7119	10.2462	0.997293	137.553	9.93044	1.58334	2.26094	19.5645	82.2936	42.8836	9.72509	6.1029	0.021068	3.86226	51.2723	17.1394	6.53555	3.69993	5.28819	17.4027	21.5448	1.79239	1.46035	8.25741	15.5393	12.4375	4.78494	5.17904	4.29627	12.7448	675.614	11.181	9.08945	1.15577	12.0434	0.897019	2.46761	29.453	18.2783
TCGA-CN-4725	3.16986	0	5.88592	21.3838	9.94473	22.0361	17.6534	10.6538	11.095	22.7599	8.67928	8.72174	0.536938	179.281	5.8035	1.34081	11.2765	4.33334	57.6578	43.3552	6.34707	17.5248	0.0356722	5.56748	45.731	15.1765	4.27277	5.91202	4.68686	13.7616	9.44013	1.77013	1.83838	8.35166	18.1178	5.98405	5.78981	3.77396	2.66752	15.6305	826.233	4.52143	14.3994	1.10714	10.0311	7.64495	0.731965	25.2325	15.7511
TCGA-CR-7365	3.26301	0	2.5014	31.5661	6.20174	14.3941	17.4513	7.9141	6.79016	98.8887	6.97435	3.93029	1.50118	142.282	3.48294	1.08261	13.867	2.71409	75.4665	22.5429	4.04866	19.849	0.017597	4.3157	35.1241	22.6246	4.59914	7.42243	3.33128	12.7627	4.43867	1.68746	1.26493	3.96429	26.8586	5.45514	4.78266	4.10316	1.6824	11.6874	535.918	4.41415	10.3544	2.69617	6.60714	4.4954	0.812421	40.7976	14.4773
TCGA-CR-6471	3.29315	1	2.49403	40.7953	5.91544	15.1668	23.6134	4.95383	6.84801	21.7024	8.67784	9.00289	1.47179	90.776	6.40051	0.995296	3.67688	4.49192	64.6878	14.5554	4.01544	11.9062	0.00468665	3.0607	36.7213	18.6772	4.89198	3.46486	9.17744	17.6615	16.5521	1.75832	0.521379	4.76492	17.3746	10.8217	5.32349	2.97739	3.15686	8.20898	519.446	7.6058	8.10056	0.895328	8.37008	18.8023	6.55731	19.826	9.35033
TCGA-CR-7368	3.41096	0	8.36559	22.2858	6.20461	15.811	38.3783	9.02837	8.93419	27.3082	8.54392	12.1876	0.895463	112.014	8.23124	1.08062	2.94942	3.9443	132.831	38.4454	6.73256	7.0867	0.0166198	4.26318	134.871	34.3231	8.26123	4.84157	4.6927	35.3641	23.6053	2.0511	0.455117	4.46792	9.38527	7.86737	4.95094	4.4705	1.40416	12.9711	723.592	7.20233	8.24907	1.50813	9.92627	2.58131	1.00165	30.5059	13.6605
TCGA-BA-7269	3.48767	0	1.59212	110.488	4.1803	5.42282	26.6155	10.9242	10.561	25.3295	7.84716	12.022	0.695521	48.5695	8.20717	1.70877	3.36727	1.35702	28.4728	38.2432	2.58142	21.9054	0.0276619	3.05237	24.8785	2.69064	4.16214	4.89509	0.435832	6.06704	12.4048	0.839078	0.107312	11.8055	18.5285	2.2513	20.6176	8.59284	0.862916	9.561	549.244	6.83535	10.7999	10.6403	7.14307	7.5985	1.92257	41.4482	17.0807
TCGA-CQ-7069	3.49041	0	1.17012	33.7311	12.4416	30.549	17.5833	6.743	15.1728	40.419	6.78961	6.49325	1.82169	98.4957	3.93153	2.3701	55.7624	1.97537	74.0714	67.0881	6.26368	17.8191	0.00808682	4.49019	127.581	6.23359	5.78104	3.74731	1.22863	11.8344	10.4539	1.85504	0.627441	4.33443	49.9503	5.77228	5.4326	4.57714	1.75654	21.9288	581.266	5.7427	7.62079	3.62422	7.21736	6.45683	2.09667	36.8945	12.1865
TCGA-CV-6948	3.53151	1	3.67333	128.186	12.0757	12.1144	21.4363	5.89868	3.86928	159.859	7.24164	8.58668	1.56139	117.313	12.6199	4.62178	1.13217	0.620445	34.5536	19.1812	15.2449	21.0283	0.120747	5.61113	19.2679	17.722	12.9708	7.09703	8.69046	18.9079	23.479	1.75186	0.608496	9.15503	17.9771	4.60149	10.5867	6.80923	1.06492	6.26779	318.466	13.2379	14.9766	16.4588	6.97717	10.7686	1.03987	24.4428	7.3046
TCGA-CQ-A4C6	3.70685	0	2.10394	26.4802	7.82642	20.1016	11.8385	8.16824	18.7163	43.3579	15.9567	10.5289	0.863373	166.008	6.35518	1.58982	17.3704	5.70221	91.4341	38.1431	8.81565	35.3375	0.0164955	3.88884	33.4717	22.8949	6.12441	3.93393	4.81784	11.0413	5.26014	2.00746	2.59735	5.14826	27.7735	5.75778	4.42746	7.02911	3.64018	18.9848	818.313	4.31627	12.4379	1.77436	5.9486	5.15297	1.74073	21.608	16.6656
TCGA-CN-5356	3.86027	0	2.95929	35.149	15.4034	22.218	24.1523	8.22461	7.34983	172.779	9.70468	8.19345	0.948057	124.375	7.02372	1.25274	2.70352	3.99708	36.5798	29.3257	8.083	2.98926	0.0248552	6.18909	22.4091	17.4673	5.37636	8.0998	2.59742	46.6526	8.87152	3.32243	0.482118	10.7271	15.8032	10.8447	6.05123	2.83168	2.69223	12.8393	341.59	6.73131	12.199	2.3057	7.16902	9.56425	1.12303	39.7417	18.9683
TCGA-CR-7392	3.90411	0	2.29548	20.2315	8.35915	21.6984	22.8163	7.00028	11.6144	35.0449	6.09078	7.32634	1.61427	114.455	5.08564	2.70706	18.1925	2.58965	78.8832	56.4965	7.74447	20.5114	0.0129996	2.13612	129.151	12.2814	3.48223	4.57769	2.47661	15.6712	12.0445	2.11087	2.15071	6.3797	22.4971	7.28874	4.40415	6.17363	3.43944	11.1584	565.436	7.70026	9.26664	5.23529	8.5878	7.92735	1.93354	43.6201	16.8746
TCGA-CQ-6223	3.91233	0	1.61811	27.0056	6.08483	15.08	12.0851	5.40141	6.1302	42.8246	6.75781	11.6583	0.685815	93.133	5.62591	0.181255	1.67804	6.83209	20.7448	7.85423	7.77858	81.9159	0.00814948	3.52421	43.368	11.4126	3.68262	1.96444	4.29422	10.3674	6.42363	2.25289	2.33162	7.29596	17.4853	6.22749	4.32113	3.994	0.515511	10.5564	450.797	8.11832	9.94939	0.887831	6.90132	15.2915	4.13316	23.9895	6.71733
TCGA-CR-7386	3.91781	0	1.53249	28.3563	5.95663	19.9041	21.7015	3.87354	9.50904	164.535	5.08816	7.11826	1.70436	86.9707	4.67913	2.72117	12.6869	2.57423	66.7542	46.1827	2.75819	16.1161	0.00632658	3.2724	67.6937	9.93769	3.53367	2.69673	3.3769	7.77122	10.9413	2.10512	1.07558	4.54601	23.3924	6.52008	3.29584	5.17179	1.95531	17.7848	468.328	8.69863	14.0155	2.75042	7.12401	7.09917	6.58993	24.5208	14.1736
TCGA-CN-6016	3.95342	0	0.251334	44.9315	4.89837	15.8027	27.8261	4.85599	14.7472	39.8257	4.30383	6.53805	2.92945	61.383	3.30263	2.41767	4.94258	4.10565	66.0526	53.7739	3.14598	3.17453	0.0521098	2.53441	59.5	6.06928	4.2428	1.83352	0.684188	4.55709	9.57735	1.29411	0.924893	2.83181	22.8373	4.5933	4.23894	5.90966	1.88312	9.40121	392.323	7.62285	4.79053	2.86391	8.93764	4.74488	3.91883	14.0877	19.9185
TCGA-CN-6012	4	0	1.9401	91.968	11.6447	21.1716	26.4782	7.78934	21.7466	68.5626	7.49056	8.87017	3.18848	116.84	8.49115	2.58062	9.35832	3.64791	58.9194	19.0803	10.614	18.2172	0.0866719	5.66777	27.4889	15.3861	3.81071	4.73376	2.54572	17.0086	20.7353	1.83468	1.7078	9.31335	13.7654	4.56446	7.78188	6.20277	11.3272	8.20075	474.544	11.6668	7.69037	13.5766	8.68259	0.885174	15.0173	30.7948	7.29286
TCGA-CV-A45Z	4.01644	1	2.81533	124.9	9.0767	11.9023	17.373	10.7222	8.27832	95.1177	11.5868	12.1194	1.48596	140.452	9.01843	1.02171	2.25431	3.09332	38.5381	25.2949	12.2514	24.0382	0.0340686	3.55314	31.4562	20.7543	8.66561	7.19923	3.48903	9.14901	14.8837	1.81206	2.63166	8.19433	24.9936	4.24037	5.69204	3.58073	2.71992	19.098	418.498	11.6567	8.5451	3.29993	4.98601	4.91004	4.49396	15.9831	12.9563
TCGA-CQ-5323	4.01644	0	3.95373	53.6138	9.50739	7.779	18.9424	8.87869	7.30493	40.9729	11.0152	8.85155	0.850579	126.272	6.81201	0.496042	5.46726	2.92433	62.4885	19.2111	7.11487	34.1964	0.0343545	4.78091	48.279	32.3822	4.26567	5.80513	5.99964	20.0586	9.68668	1.62736	2.7537	7.66754	14.7601	9.69947	6.01884	7.73643	5.13025	10.3085	791.025	11.0361	3.71893	1.99551	7.70276	6.81426	6.32091	24.7423	8.38488
TCGA-CR-7404	4.03288	0	6.0477	50.8816	9.59961	19.0725	27.2802	10.1276	7.74491	50.7434	6.82018	11.4845	1.04637	120.296	8.55985	2.1274	2.74617	9.66225	79.594	36.4372	13.3089	2.37555	0.0287882	5.59495	64.97	21.4792	9.90709	5.9936	6.95795	17.6986	17.3714	2.36856	1.89694	9.11341	12.7802	12.3508	8.03306	4.92709	7.32301	5.0442	802.559	10.0998	9.71548	3.00498	13.5594	14.5813	0.392837	21.4614	14.9657
TCGA-CV-5976	4.04932	0	2.77189	58.3802	10.3176	19.2395	21.1452	6.36519	8.27666	66.4753	9.19205	11.8825	2.26715	106.512	6.8797	7.88159	13.5691	2.27586	24.7181	41.8254	6.33585	0.916868	0	4.68831	72.123	14.8	5.55986	4.63537	5.68262	12.0526	8.20268	1.8329	0.179477	4.97489	31.73	4.13934	7.14989	10.4706	1.4352	18.9123	677.721	12.3662	10.7312	1.30423	7.68739	6.36055	0.702857	285.203	20.8367
TCGA-CN-4722	4.06301	0	1.16987	39.9068	15.3539	8.27664	24.1877	4.09861	1.6161	24.6964	4.25674	6.17195	2.0607	114.072	4.50173	1.12843	5.68418	2.55641	21.9178	17.5169	5.16266	17.9915	0.0437567	4.68399	21.3385	11.6678	3.80021	3.26269	1.83688	11.5104	11.5179	1.55852	1.30364	6.63689	12.4966	4.63035	4.76098	3.70947	1.16278	11.9182	521.706	10.2475	7.97536	0.637608	7.95351	12.7364	0.933237	32.9912	15.2663
TCGA-CR-7390	4.13151	0	5.46328	35.347	16.0878	30.3395	23.5852	6.04397	14.9996	112.402	8.5965	10.2497	1.88054	95.7007	2.86258	1.21962	13.0029	0.941797	39.911	34.5642	3.66942	6.14192	0.00999946	3.30738	39.7405	20.3518	3.11823	6.08556	6.78824	19.4342	7.02589	2.7391	0.296645	6.67436	18.0199	7.12425	4.80897	6.40317	4.50861	15.6954	640.319	9.1852	10.7168	6.31682	10.6116	7.43003	2.92458	65.2416	19.7952
TCGA-CN-6010	4.1726	0	4.75649	78.6447	10.9515	31.1555	19.6824	6.5689	11.4195	68.7137	7.98467	8.72082	3.86162	168.492	7.49584	2.70341	3.5595	10.0269	100.66	37.1386	11.2254	14.3917	0.0685576	4.34961	47.5713	21.4482	5.82245	4.22201	4.65899	15.222	10.8926	2.15359	0.701011	8.74484	27.1498	5.14137	5.8373	4.38497	9.02383	6.45296	535.773	9.42405	9.31888	19.2318	7.64385	1.90978	32.7336	28.9985	14.3319
TCGA-CX-A4AQ	4.26027	0	2.20172	158.08	5.47266	7.51941	49.6685	10.2278	17.3571	602.203	19.0277	10.9903	0.984063	95.4141	8.73574	1.62198	1.34887	1.26695	31.3134	139.976	8.11292	6.42773	0.154894	3.86189	149.318	11.9836	9.39263	4.01686	4.4232	5.70471	25.2608	1.32011	0.412382	12.9103	18.126	5.82703	9.96141	11.2093	2.93582	10.9453	600.618	8.0949	4.68471	2.52873	4.77064	1.37776	4.01259	18.7351	13.1922
TCGA-P3-A5QE	4.27123	0	4.81149	31.1638	2.58069	19.9037	40.7061	8.78588	4.20184	182.08	14.3594	9.54335	1.2995	66.0796	12.0892	1.09185	0.857163	4.00924	67.4261	18.1752	18.3788	7.74963	0.0528821	2.52236	30.3059	17.4396	10.8216	4.94176	6.13088	22.5713	19.8019	1.94279	1.22689	12.0167	8.79812	13.3338	8.05815	6.84811	4.63672	11.5251	427.781	13.4499	12.5154	4.55674	7.98877	0.169474	3.06821	36.7058	12.8819
TCGA-CN-5373	4.33973	0	1.39843	27.6026	8.22274	30.3568	22.7931	3.80317	10.5711	94.2436	4.34189	8.09709	1.90638	115.213	5.044	2.44335	6.38254	13.7424	32.047	30.9927	4.92391	46.2233	0.0055285	3.21364	46.5466	9.7261	5.82473	2.06114	2.06653	11.5686	7.98804	1.68395	2.22989	3.75957	22.276	8.00962	3.30985	6.10332	1.35415	18.1383	397.591	9.77694	9.799	1.29593	6.5287	7.15279	1.08132	23.4898	14.9945
TCGA-CN-6023	4.33973	0	2.92068	69.3637	10.5382	11.1182	19.717	9.92822	8.58083	58.0039	9.26627	16.994	1.18019	132.731	10.6738	1.7903	1.42113	5.36739	66.8298	41.0504	14.3013	3.65685	0.212515	4.52281	51.1811	19.2355	11.1074	4.77843	4.41133	27.4293	17.0066	2.26954	0.881922	12.2058	32.3058	7.34896	7.5005	4.28307	13.7044	5.92679	587.359	9.3291	7.8182	7.48786	8.29028	0.761087	1.52792	14.0984	7.54915
TCGA-CV-7103	4.3589	1	1.08449	45.228	9.92448	17.318	29.4441	5.62264	14.0333	10.7738	5.45555	6.90993	5.10337	77.3332	5.54173	4.10444	5.63727	2.19854	54.7498	64.7963	4.76728	10.8211	0.0227376	3.81471	46.0273	14.3239	6.52401	2.22669	2.43827	9.64713	9.92264	1.8284	0.3684	6.35251	29.8238	3.81861	8.58976	4.88227	3.45457	11.7187	514.902	14.657	6.29134	4.20756	8.91213	4.69064	2.70558	14.1908	11.9891
TCGA-CQ-7065	4.46027	0	2.36291	17.7575	7.73479	5.79788	11.2167	5.66302	2.71052	8.98574	5.77893	8.51466	2.3388	148.541	4.22743	0.785333	19.292	0.795535	28.6535	71.6221	5.2507	13.5593	0.00512694	4.52445	51.8887	9.2597	8.31536	3.29045	2.47281	8.55738	9.14701	1.96874	2.24049	6.01119	27.4051	1.64799	5.68084	10.2263	1.00996	15.2465	451.751	9.14073	10.5427	1.03238	5.37982	7.61672	2.47662	13.8812	14.6431
TCGA-CQ-5327	4.54795	0	3.571	53.2074	9.0036	9.31228	20.05	5.71459	4.71248	88.8968	7.53833	6.23106	0.88937	105.049	5.05383	1.08597	5.85264	2.54718	38.2136	20.2991	6.04964	18.8945	0.0175662	4.99837	39.0593	17.3285	5.71147	4.84861	7.53111	12.308	12.0153	2.16729	1.03556	8.54241	16.8347	5.24285	6.99755	3.47828	1.8469	8.45286	641.773	8.97976	8.61626	7.9935	5.75471	17.6205	0.852285	18.5894	12.6198
TCGA-UF-A719	4.55616	0	5.68218	50.6329	15.9441	9.7717	27.4655	7.16983	8.20073	16.2773	12.4398	21.2179	4.30604	81.2076	6.60161	0.421593	6.95462	0.649635	31.4067	20.4077	7.48299	1.74765	0.0103091	4.00107	52.7548	16.9783	5.05302	12.2415	7.84787	23.6332	16.6685	2.45144	0.788101	12.1648	14.4085	7.10572	7.38001	3.31477	8.30487	7.76708	465.284	11.0803	11.7525	1.50102	11.2681	19.8677	2.01166	12.4837	6.02914
TCGA-CV-7428	4.57808	1	3.38593	59.7704	5.48111	11.1841	25.0672	6.76972	8.94614	94.0918	10.4622	9.15043	0.720754	139.982	6.17928	2.19771	1.22279	2.72178	67.2094	26.0876	7.2302	1.71078	0.0207322	4.10343	41.949	18.3509	7.3007	5.16805	7.5496	15.2324	9.87563	1.99899	2.54887	7.15346	16.715	8.06904	6.03166	5.87125	3.62595	24.3707	930.181	10.4439	8.53947	0.580714	8.45124	9.7384	0.598819	24.2995	20.4688
TCGA-CN-4734	4.63014	0	2.23477	40.9718	6.96963	14.6343	23.3235	4.49362	7.06854	28.3759	5.82418	7.44351	0.622952	225.899	3.967	0.741769	6.38282	4.13974	118.141	38.0849	5.22758	2.93407	0.00493499	5.06007	42.3842	10.9675	3.68058	3.58142	4.05433	12.8566	7.65071	1.67318	2.6662	5.08354	14.9311	6.06388	3.38969	2.41669	3.40966	5.40304	1010.28	3.5655	11.5933	2.14289	7.14818	10.2439	0.475882	16.454	19.39
TCGA-CN-4728	4.72329	0	1.48788	24.6078	4.03044	28.0392	16.7818	7.83068	16.0282	108.025	6.73912	5.7459	2.19861	99.4754	6.43665	2.4849	11.8495	1.67305	67.3997	40.403	7.60531	4.72153	0.0279312	3.08603	31.7928	17.055	3.62958	4.2699	2.37102	9.71679	18.0734	1.60766	2.24362	4.63159	21.6386	6.26803	4.07682	4.30564	4.15329	9.74883	454.255	6.28423	7.8739	2.84967	9.98213	2.41428	2.46473	18.6131	13.9109
TCGA-CN-5374	4.74521	1	7.33177	84.0514	7.35146	14.7699	16.3692	13.6226	12.6037	39.0937	11.6866	16.9998	0.605253	62.9011	13.5072	1.42437	1.02433	3.81724	26.51	16.8279	14.6678	1.79945	0.0411459	4.57021	43.5042	21.8298	10.095	6.49625	8.90286	13.8894	20.7845	1.84103	0.950689	7.91406	7.03302	7.12649	7.02567	5.18949	3.37131	7.30063	644.411	13.8936	8.21824	0.293881	12.7235	1.1585	0.97945	13.3189	10.9708
TCGA-CN-4735	4.7589	0	4.90286	36.3491	11.3834	36.3966	38.901	8.60305	8.89652	155.934	9.54618	15.5462	1.02298	109.004	11.9828	2.99832	3.16287	0.611366	37.3828	44.3973	14.1483	23.81	0.160403	2.57612	26.5177	7.37103	5.1494	5.02036	12.0146	9.63388	13.1446	4.41405	1.45436	11.2169	8.91405	14.7047	5.9222	7.7203	3.2068	15.9412	746.732	13.6876	17.58	8.99769	16.2395	16.3736	11.9812	79.6147	24.6312
TCGA-CV-7406	4.78904	1	5.28778	68.3658	13.3551	25.2524	23.9301	9.43018	9.98593	21.1439	6.58234	11.7556	3.24741	76.8893	10.5591	7.84282	3.60189	3.70267	69.4553	31.3652	4.1764	1.85669	0.0386182	4.33814	104.322	12.6978	14.0708	9.0991	9.79429	19.0248	14.7608	2.54322	0.0936349	11.3278	19.9772	6.9457	4.74391	4.42345	31.6151	10.8268	385.978	7.3334	5.0955	3.42208	12.9178	7.41685	1.20765	15.125	25.2704
TCGA-BA-5153	4.8274	1	5.98186	25.3728	8.93023	43.0855	67.2164	6.1616	10.1393	21.4314	11.8074	10.9828	1.63808	82.6027	12.4279	1.23125	1.0405	5.24505	54.3811	24.716	11.1334	8.2149	0.0727173	4.0632	194.249	25.8977	7.25875	5.35187	7.03209	28.5556	32.0506	1.66196	0.672062	8.48936	20.3705	10.646	5.0369	8.4241	6.50703	9.68098	663.952	16.6253	12.1637	0.529389	12.2101	15.8101	0.42999	55.3155	13.9565
TCGA-CR-6467	4.86849	0	7.43144	48.0136	5.15236	31.7837	45.3789	13.317	20.1385	112.461	11.876	6.93738	0.703598	86.8372	11.5978	1.25144	1.30605	3.9281	99.6637	28.9745	11.8172	9.92081	0.0340899	3.82779	28.8394	23.3117	9.56662	7.86922	6.0775	20.1471	17.5684	1.77595	1.59476	11.0646	9.39664	13.5635	4.78149	5.21078	23.1243	7.66563	562.92	10.4133	10.9671	1.93223	7.54089	29.7835	0.530653	11.9179	14.2349
TCGA-DQ-5624	4.87123	0	1.66966	49.1318	7.90685	33.9541	14.1431	7.80047	15.069	50.9196	7.40684	10.8754	2.22802	103.885	2.98071	2.27801	15.1228	2.80894	90.1883	49.2317	4.48447	12.9851	0.0555643	4.66997	100.366	8.41594	6.46296	2.9378	3.08196	7.34293	6.15294	1.7208	0.178876	4.27448	21.9705	5.0872	4.63712	6.2386	2.59084	11.1715	632.201	8.65426	10.3291	8.63945	5.7353	8.59821	2.30715	152.66	14.9339
TCGA-CV-5977	5.0411	0	3.73341	69.7363	5.16141	15.8639	11.7564	9.51243	11.0864	40.2335	12.03	8.02841	0.351921	155.114	6.97477	0.79203	24.5312	1.53475	71.7303	71.0291	4.37261	28.8219	0.00601599	5.09734	67.5536	18.9873	4.64354	7.18451	4.26538	13.6999	5.1115	1.81222	1.57878	6.20716	20.0984	4.1227	6.42165	6.28086	4.77168	13.9313	1225.6	4.32586	8.88498	1.79226	5.64962	6.02354	0.3831	16.7818	14.3481
TCGA-CV-6436	5.20274	0	1.07872	117.577	3.20849	4.51507	13.7587	2.83591	11.0453	100.266	4.68372	2.74729	0.877949	39.0027	3.36324	0.244132	4.62303	0.732286	28.7958	22.2581	1.42179	11.7087	0	2.00339	25.8282	11.4015	5.58785	2.97024	2.07268	2.43172	6.21057	0.48324	0.259746	7.12829	9.58503	1.01959	9.3918	3.85435	1.35385	3.56909	565.366	3.99581	7.06088	0.593878	2.22475	10.3805	0.235434	5.26827	4.16352
TCGA-UF-A718	5.4	0	2.64901	82.9268	5.23404	27.6293	30.4511	7.05114	28.6925	73.696	7.25719	11.6207	1.02844	187.562	6.29407	2.33946	8.45518	3.74515	48.5073	107.223	7.90275	8.65517	0.0363459	3.51879	124.1	12.1869	8.20149	4.98289	3.94848	11.1647	21.6507	1.11253	3.13697	6.73136	15.8853	7.13363	3.80135	3.73923	3.0805	29.5824	1034.57	7.54912	7.76638	8.81468	6.10138	11.8072	1.79965	44.7181	13.9299
TCGA-CV-7089	5.40274	1	2.14702	24.387	6.89922	11.199	16.9731	7.06032	8.09247	75.4025	8.59191	6.5514	6.46919	98.5661	4.73244	0.496358	26.4159	5.17611	72.5192	33.3924	4.44155	8.0764	0.0144633	3.46063	50.3077	20.2697	4.11377	4.31668	4.64672	12.7066	9.39615	1.1444	1.66677	4.82893	17.4123	4.92382	4.83852	5.66768	2.61799	17.5893	743.616	7.03595	8.02976	0.826421	5.44516	5.08538	1.10085	21.3115	10.3906
TCGA-BA-5558	5.46575	0	1.35897	18.9056	8.8304	46.7979	10.823	6.2898	10.1103	134.906	8.68447	8.60953	1.45476	102.953	4.99678	0.543696	4.88887	0.834198	48.7643	30.6648	7.06362	40.1694	0.0147147	5.81966	41.3871	17.5784	2.60382	2.72446	3.60771	16.9706	9.07742	1.68153	0.92622	7.27072	21.1916	8.26341	5.41205	3.24969	1.71993	11.6506	743.21	8.83244	4.95271	1.32196	7.33322	2.97762	4.72533	40.4603	9.60741
TCGA-CV-6954	5.48493	1	3.26126	38.7679	6.22859	14.8578	14.8938	18.6764	6.75163	69.2169	7.11563	15.105	0.50956	66.5876	4.97155	0.736817	4.34241	1.04381	27.3501	31.7052	3.06257	6.26228	0.0424372	4.4767	45.4485	11.9527	5.34183	4.47742	3.68768	22.1959	5.9635	2.38197	0.363157	6.22666	13.8614	4.68853	5.41615	6.19485	1.85582	13.1373	538.35	14.7445	17.0336	3.90237	8.38474	6.50471	0.633136	55.6002	5.61379
TCGA-CQ-6222	5.52329	0	1.13493	31.3402	5.15705	13.8105	14.0721	4.25806	10.52	79.5946	4.92315	6.87607	2.80483	93.0192	4.05302	1.2466	1.48556	7.19455	68.6801	14.9508	4.05653	6.88885	0.0105624	2.69081	12.8733	9.9872	3.27659	2.27186	1.57503	7.68981	12.9383	1.36234	1.40704	6.25399	11.5915	3.63316	6.2562	4.31312	3.34378	6.78652	449.61	8.37845	6.99324	0.766227	6.23667	6.62249	1.48937	12.8343	34.6493
TCGA-CV-A461	5.65479	1	1.37654	74.0756	6.9509	16.9414	31.1297	7.35403	7.32799	54.6976	8.31409	21.2495	1.07725	76.038	8.77632	0.790752	11.046	8.49938	22.0754	23.7446	7.21359	7.38898	0	5.85739	45.0052	13.3165	7.94319	8.74014	2.31794	7.2216	17.0648	2.22834	4.26937	10.7248	21.5526	4.43187	10.6171	11.1478	2.01176	26.6784	376.667	13.1712	9.60725	2.03396	7.58543	10.4621	0.331408	18.867	26.0801
TCGA-CN-5361	5.80822	1	3.26398	53.2478	7.35933	12.2429	33.4718	8.32274	11.0872	17.3368	8.50927	10.0149	1.43578	110.088	6.56512	1.14219	27.8935	2.30044	45.0501	63.745	6.13499	2.16115	0.024121	3.28463	140.466	14.5287	9.89829	3.68269	3.30599	8.96399	18.9698	2.51829	2.35314	3.65636	47.0528	4.00459	4.03004	4.70421	1.65123	24.4273	571.385	8.61425	15.0059	1.84944	7.75663	7.5176	2.96784	79.9123	19.2897
TCGA-CQ-7063	5.84384	0	1.65495	34.3757	12.1767	19.4897	23.5021	4.13798	12.2405	57.8836	6.46581	9.86024	0.786615	89.8868	4.45151	2.23155	12.0955	8.32977	60.3207	20.172	7.71808	34.6304	0	3.99207	53.4554	16.2891	6.02966	3.22149	4.05403	12.6443	7.64802	1.44365	1.59701	4.14295	18.0373	5.7572	4.62266	3.3152	4.96689	13.6841	581.815	7.5985	4.31103	0.596487	6.4044	8.96429	0.384008	19.4793	15.405
TCGA-CQ-5329	5.87123	0	3.84081	58.5639	8.17169	8.3374	16.5102	12.1282	10.7278	91.9448	9.92468	13.5156	1.95873	111.619	9.92147	4.16668	46.724	1.38824	90.5401	29.0818	5.98363	7.0684	0.0389506	11.551	37.7761	8.10155	7.23074	6.32837	11.7228	15.4837	8.84165	2.20591	0.991073	8.11595	23.7042	9.75282	8.19791	7.08993	3.83423	14.3982	652.934	7.69346	16.8729	2.91608	6.90718	8.82348	0.900026	59.993	18.6637
TCGA-CV-7178	5.93425	1	3.22138	41.8336	14.0185	12.4491	25.8925	8.14505	5.52235	254.335	7.43663	17.5481	0.950086	179.082	5.10143	2.35683	8.59087	0.718345	68.893	35.6282	7.19071	3.19928	0.00853238	6.81216	34.5611	12.5397	3.8487	4.83082	6.75941	14.7026	32.8631	4.76946	1.43598	8.98929	22.2103	4.75577	4.85085	3.76648	2.58529	4.3052	753.906	8.09542	9.11763	4.4605	12.8188	8.00011	1.99873	29.9761	17.9107
TCGA-UF-A7JA	6.20548	0	2.8729	55.9719	10.0468	35.0177	33.1856	15.2051	19.6183	286.776	8.19729	12.406	1.47972	192.221	8.40336	5.04004	4.05197	1.09549	43.7214	117.927	10.4116	22.0018	0.132366	3.71937	120.07	11.6556	8.23691	5.15464	3.34411	10.3337	20.2853	2.42304	1.37005	7.94978	13.2108	15.5025	4.06979	4.63736	1.73687	9.9051	738.683	18.2137	12.8679	7.04907	8.84676	9.28474	3.55225	32.6612	20.8086
TCGA-CV-5435	6.35342	1	2.81498	56.2507	11.399	29.646	25.6934	11.4274	19.4849	30.3783	6.98676	7.64473	3.45146	118.275	9.04028	9.25789	12.2814	3.5383	60.9118	37.2569	7.78315	12.1629	0.0616517	3.18457	43.704	15.5767	5.97346	4.7701	1.49174	6.26928	10.7648	1.18112	0.643654	5.81377	46.8576	4.92772	4.14882	6.75819	6.30038	16.7433	388.698	6.77459	12.6112	10.53	8.32832	6.60757	1.39092	23.7568	21.958
TCGA-CV-7235	6.43014	0	1.22012	36.045	7.7434	46.3278	20.7545	3.87688	20.7682	261.666	3.98854	4.06205	0.843289	179.849	3.68337	2.3131	4.21486	0.865683	75.6447	35.7478	6.92964	1.60985	0.0054598	1.68291	93.0572	17.0836	6.25023	4.582	1.5844	27.5738	11.9998	2.91087	0.482798	2.51486	27.3234	10.396	4.18726	5.21985	4.49454	5.29954	577.323	17.691	5.61113	15.3579	11.4556	6.33651	24.899	35.2067	25.2406
TCGA-CQ-7072	6.46301	0	1.50362	36.1253	6.189	10.9481	18.0107	9.99551	14.3271	49.6021	9.98846	6.04927	3.9929	77.792	5.57899	8.48027	15.7995	4.04796	63.0729	50.3325	12.1053	3.1161	0.0669364	3.26991	55.8389	5.81639	3.56066	2.01899	1.92811	8.49957	15.1377	1.01005	0.378691	4.64346	31.1888	3.38634	8.08989	4.04743	3.9474	17.7154	368.076	7.25187	12.1969	8.74381	8.84882	7.50544	3.1766	126.213	11.9702
TCGA-CV-5444	6.67671	0	1.74404	22.0868	7.1675	16.8657	19.6696	8.76812	8.98064	20.0438	7.02673	8.83173	1.96583	103.458	4.73176	2.69154	16.1043	1.51574	47.7018	64.6913	6.97827	8.79214	0.0331402	6.38556	99.4541	25.3187	3.98268	2.30701	4.47555	9.1814	21.2128	2.32239	2.9948	6.09484	52.3007	5.42948	4.38341	6.12519	3.55709	11.6034	569.188	5.95404	9.39593	5.20514	8.99545	8.91221	4.13032	43.2998	16.0283
TCGA-CR-5243	7.01918	0	6.14581	28.1813	5.24463	29.3271	44.9154	3.84782	14.2067	61.6495	8.36522	8.85346	1.27444	128	12.1202	2.12272	2.20208	4.91218	63.962	75.2555	10.6262	9.5021	0.0258173	4.4513	160.245	22.6518	10.3001	5.5616	6.92338	15.668	27.9598	1.45996	0.709928	6.27888	14.616	12.6721	5.21807	12.8036	4.53993	9.20505	803.498	14.8903	11.0492	2.70331	12.2805	1.17724	0.906578	33.1698	20.036
TCGA-CV-5973	7.23562	0	0.665011	73.024	2.49532	12.4265	10.992	3.86111	10.2231	174.402	4.7035	5.27064	3.6228	48.7053	4.7418	0.738013	5.20598	1.50021	29.3753	48.4641	8.35462	25.7605	0.0130622	1.90741	52.3966	5.18344	4.76461	3.57451	0.451508	2.54963	14.67	0.631098	0.253368	4.31009	31.456	0.99556	9.25993	13.3322	0.747041	7.73417	671.529	5.96561	5.02821	0.741866	4.73796	7.1642	0.968456	9.72234	9.14991
TCGA-CV-A45Y	7.40548	1	1.73772	86.5746	5.71885	23.3236	25.9617	7.36268	13.1541	73.3647	9.73037	12.0917	1.66011	96.5109	6.81863	1.73822	5.9482	1.69144	35.6202	36.7067	10.0744	13.8153	0.0441166	4.2275	47.7134	11.107	7.38754	3.15856	3.59365	8.02865	15.187	2.02338	1.74502	6.60116	21.2393	3.68406	8.4628	4.1674	2.47636	10.0248	530.885	10.2358	6.75731	2.50561	6.65507	2.01639	1.96655	10.3227	15.426
TCGA-CV-6933	7.50959	1	2.08345	53.1852	21.2489	16.3476	23.5393	6.87385	21.0054	134.246	8.82592	11.2071	2.28871	122.324	5.28788	2.3038	6.0364	1.62098	34.737	27.4078	5.42511	5.55437	0.0160152	4.3955	28.6238	17.9552	5.23543	2.9842	3.54358	14.1575	20.6586	2.03705	1.90272	10.958	16.5362	3.18161	8.87739	10.1806	2.70616	15.1103	427.321	9.03564	7.86268	3.58873	8.15763	7.01133	2.64069	453.091	10.1995
TCGA-CV-5441	7.90685	0	3.02443	64.4227	8.6891	41.1996	36.7607	10.0414	10.4909	154.218	13.1651	12.1994	0.515403	167.291	12.8666	0.571999	1.70449	4.5131	39.1857	51.3173	6.45951	1.93335	0.0188328	7.32026	54.4913	16.3547	7.73844	20.1182	3.51729	13.5775	12.9165	2.6084	0.175488	11.3664	25.6864	4.71387	7.30544	7.46304	7.02453	18.3951	611.923	12.7228	11.4764	2.8134	7.33407	9.47564	0.776675	19.8255	20.8093
TCGA-CV-7250	7.94521	1	2.6869	37.8772	8.74262	35.3403	26.4293	6.86332	22.0471	76.6789	12.3789	20.0455	4.65651	109.914	6.06747	1.31452	0.566892	5.19338	33.9573	18.0052	4.70175	6.30602	0.0127902	3.28083	27.9172	13.84	6.7898	4.43446	5.42864	16.1772	6.99473	2.58735	0.488885	8.14074	22.1347	5.48446	6.62596	4.48594	6.25086	28.2585	525.773	10.879	15.4197	0.848587	10.8561	20.2545	0.308339	16.9057	18.928
TCGA-CV-5440	8.9589	0	0.944817	64.943	5.88085	27.2531	36.4808	7.26452	11.7152	142.137	9.18248	14.2341	0.49611	135.256	5.81604	1.05578	1.53822	7.63727	79.0803	12.8192	7.53503	28.8989	0.00710896	3.23684	22.177	16.0311	3.18348	3.94444	1.66867	8.51218	12.4578	0.758619	1.17614	4.21516	17.577	3.55719	4.75919	6.09363	7.83571	9.76402	476.638	14.5493	5.01329	1.77285	12.6202	5.93645	5.19312	37.0112	20.271
TCGA-CV-7091	9.26301	0	2.51515	35.17	7.94593	19.3492	20.5584	6.86397	11.4925	46.506	5.91059	8.46405	1.02975	144.541	4.48935	1.21253	5.26718	3.44797	65.7887	39.3222	5.85378	13.8828	0.0277433	5.68148	57.8032	11.617	4.99211	7.69676	3.39359	15.387	16.4881	2.21849	0.799294	10.138	19.9636	4.63661	9.45289	4.67267	2.53494	11.818	678.782	5.67797	7.4313	2.01735	5.97234	10.0956	1.06844	33.6181	13.3315
TCGA-CV-5432	10.7671	0	2.79956	169.641	15.2705	36.7408	21.7907	13.6159	6.71906	141.198	15.2285	10.1454	1.01538	304.015	6.09635	0.542638	1.94591	1.15904	58.6895	26.1313	4.90046	4.17207	0	7.42686	21.2768	20.2994	5.51364	7.55849	2.75715	10.752	14.4636	2.8746	0.953288	10.9448	20.7322	4.0684	10.5406	5.99107	4.58262	15.5332	699.122	6.25133	12.9807	2.92427	6.15365	7.36013	1.60011	26.102	9.51117
TCGA-CV-7183	10.9068	0	0.661733	35.0056	9.83973	22.8548	20.1399	4.4988	6.92386	84.1301	4.20082	5.60499	1.07227	146.169	4.27195	0.475025	4.27427	3.38079	38.6568	23.2441	2.37823	11.8562	0.0167618	3.00403	29.9073	8.99187	3.55747	2.79484	1.03302	8.44623	6.71345	2.04457	0.439882	3.28482	10.3673	4.01776	3.77938	2.85356	6.2908	7.93264	674.258	10.8057	8.20162	5.24171	4.77223	8.33899	0.528616	21.9964	13.3732
TCGA-CV-5430	11.6192	0	2.5862	42.2136	12.0486	10.7394	60.921	11.834	8.35625	88.2312	10.9515	12.7401	2.16927	87.4213	9.92494	1.38271	0.938377	0.597644	33.7083	17.9508	14.4188	2.27524	0.0233132	3.88284	38.6276	9.05105	3.45467	3.65261	6.02822	35.5644	19.7157	1.89688	0.65171	7.83577	22.2839	10.5221	8.10572	10.1218	1.80468	5.72667	237.347	11.6347	12.6918	2.31111	8.73926	3.51506	2.67226	24.6351	8.48244
TCGA-CV-7435	12.8219	1	2.13536	35.6875	11.3919	21.8268	13.7979	5.15493	12.806	43.7347	5.28896	7.84897	1.25842	79.4716	5.8483	3.01191	22.5144	1.72118	67.794	48.298	3.9678	4.90675	0.0237176	2.80074	46.5029	11.744	4.90499	8.07919	1.77692	19.0182	9.77132	2.17624	0.619716	5.24384	23.4104	9.74578	5.31654	6.38526	2.55668	30.967	624.176	5.60335	9.53266	2.36345	8.37721	3.39651	1.54055	18.7129	19.856
TCGA-CV-7427	13.0411	1	3.04462	25.0463	8.89429	43.0746	20.4867	4.95602	6.88966	103.954	6.4834	11.8328	1.0481	147.07	6.69213	1.02063	6.60596	11.2141	80.3113	24.1051	5.86381	55.4397	0	2.96367	26.1269	19.5533	7.52593	3.10751	6.50969	16.0714	13.6766	2.76762	2.36141	5.10533	12.7056	9.65526	3.8556	1.79381	6.12638	12.5201	572.542	10.8042	10.645	1.16402	6.9711	11.1781	0.385574	20.8463	11.6397
TCGA-CV-A45Q	14.1151	1	0.894035	84.984	2.48224	4.56519	31.2987	5.5357	4.32244	28.6495	8.39538	5.82274	0.138425	51.8537	0.577748	0.249569	3.31493	0.536337	23.9919	23.9094	2.52952	15.7944	0	2.1582	24.8852	6.93027	1.94209	1.678	0.833165	2.65586	14.9047	0.265443	0.0607498	3.95955	10.9715	0.865703	16.9097	4.29991	0.0369091	4.5482	714.701	2.19395	3.39916	1.6494	2.84385	2.99006	0.968713	3.38799	8.01794
TCGA-CV-7090	14.389	0	3.37447	41.4237	9.84424	15.8669	16.2694	7.00094	9.67855	33.7972	7.90408	6.29906	1.22775	146.012	4.88268	2.92245	45.523	2.32112	134.964	62.7713	4.90772	27.6681	0.0175071	4.82549	78.9731	14.4848	7.43129	4.53457	2.71615	15.3562	16.8916	3.10883	1.95096	5.07301	29.4461	4.30083	5.00368	2.71238	1.63167	16.9505	765.606	3.43473	11.413	4.14299	7.74725	6.28386	3.14815	38.9798	14.2116
TCGA-CV-7410	17.5808	1	3.38744	29.6382	6.56274	23.926	17.6163	6.03389	11.1398	135.624	8.71179	8.79017	1.03764	104.849	11.0005	1.66494	4.48948	4.36451	66.3694	44.5914	11.209	61.8866	0.041646	3.73512	56.1275	12.8237	5.17668	3.77861	7.65894	16.4085	11.9892	2.01407	1.82945	8.47915	15.3999	11.4882	5.85206	5.95506	2.44861	15.8369	610.001	8.53283	10.7209	2.48952	8.37649	6.96136	3.02668	25.1406	12.6327
[truncated: 168 more columns]
