# Supplementary material for: A Novel Prognostic Index Based on the Analysis of Glycolysis-Related Genes in Head and Neck Squamous Cell Carcinomas
Source: J Oncol. 2020 Sep 24;2020:7353874. doi: 10.1155/2020/7353874 (PMC7532401; doi:10.1155/2020/7353874)
Supplement: Supplementary Materials — Supplementary Table 1: clinical information for 528 samples.xlsx. Supplementary Table 2: expression of 298 glycolysis-related genes in 546 HNSCC samples.xlsx. Supplementary Table 3: the expression of glycolysis-related genes and survival of patients in the training cohort.xlsx. Supplementary Table 4: the expression of glycolysis-related genes and survival of patients in the text cohort.xlsx. Supplementary Table 5: univariate Cox regression analysis of the training dataset (24 mRNAs were identified, P0.05).xlsx. [file 7353874.f1.zip › 7353874.f1/Supplementary Tables 4. The expression of glycolysis-related genes and survival of patients in the text cohort.xlsx]

## Sheet: 04.test
Supplementary Tables 4. The expression of glycolysis-related genes and survival of patients in the text cohort
id	futime	fustat	DEPDC1	MIF	SLC25A13	PFKFB3	PFKL	RAE1	SLC16A3	DDIT4	NUP85	BPNT1	CAPN5	PGK1	NUP43	PGM2L1	NT5E	VLDLR	B4GALT1	PLOD1	OGT	CHST2	ENO4	ALG1	AGRN	NUP188	CASP6	SEH1L	HMMR	NUP153	GUSB	GALK2	P2RX7	POLR3K	CHPF2	KIF2A	PGP	LHPP	GNE	TPBG	ENO1	MXI1	RPE	STC2	ARNT	ALDH7A1	CHST1	EGFR	PGM1
TCGA-CV-5978	0.589041	1	2.43934	9.90023	11.6457	13.6575	15.2513	9.38073	7.29929	10.5635	7.72417	9.69248	1.27886	89.8861	7.56161	3.16639	21.062	4.1602	60.6482	44.5284	6.08877	11.0727	0.0173072	3.9584	17.3396	15.3976	9.7091	5.89605	4.61202	13.1133	13.395	1.59968	2.34502	8.16035	52.2075	4.72009	6.86758	3.71893	4.03925	10.8505	445.661	7.76766	10.7514	2.04635	8.06776	2.03636	1.86574	23.7887	11.2532
TCGA-CQ-6227	0.353425	1	3.57168	33.8936	9.04804	24.3873	19.2421	5.90433	14.2667	81.1072	7.85238	7.50636	2.66754	54.339	5.35269	5.02376	38.2738	3.91759	82.7962	69.8168	4.12767	13.5793	0.0374891	4.43519	54.8681	9.23271	5.14157	8.6476	2.97343	9.40707	12.4796	2.6828	1.05987	6.71883	30.0543	5.44683	6.40852	6.2233	4.13168	21.4415	452.203	7.27777	12.5359	3.04755	7.22487	3.94947	1.48544	27.4206	25.2151
TCGA-CN-4727	4.27397	0	6.34406	48.3582	11.4901	44.2437	47.1438	8.44753	30.9729	118.352	5.69111	14.9978	0.807101	83.2132	6.23492	1.51206	54.1898	2.70882	34.6624	32.2278	4.26443	4.73509	0.0137972	3.57798	63.6736	32.4679	8.44776	5.49167	3.92068	12.7488	9.64506	2.72151	0.0550991	11.3469	15.3283	4.74125	2.27316	5.18824	2.14406	16.9489	918.107	16.6203	9.68649	13.8094	9.28223	12.6712	0.589923	25.0151	28.3219
TCGA-CV-6942	11.7315	0	3.34678	34.4468	5.61003	12.387	21.4078	5.29166	4.92355	66.8375	12.5717	7.94691	1.65783	81.2901	5.46295	1.97743	14.4196	3.07213	48.0202	31.6249	9.89177	6.70433	0.066614	4.33628	38.8404	12.8797	5.89832	4.84134	4.18347	9.76499	16.5585	1.74566	2.37046	9.49789	20.6193	4.48663	7.72888	7.55886	2.38589	7.53665	798.841	4.28899	6.54531	1.80569	5.74142	11.4975	2.04525	14.2594	8.60587
TCGA-CV-A468	1.27123	1	1.05491	46.1306	6.45678	27.9521	17.8337	7.54936	7.94301	53.9275	10.02	8.68535	1.35805	67.5142	6.36842	0.725039	4.88472	3.44158	48.724	26.022	12.1983	22.444	0.0197504	3.61377	30.2248	13.2478	5.69264	4.24314	2.15922	9.82781	9.78369	1.67615	1.12301	6.69343	25.2042	5.70276	5.16361	4.6591	2.53293	8.47808	454.174	7.75421	8.53432	0.86339	5.16597	9.25917	1.67695	10.1105	14.0565
TCGA-CV-7423	8.38082	1	3.60616	36.4912	13.5802	9.79339	16.5627	7.69662	12.0532	24.4742	6.70323	8.36285	0.785955	100.339	6.85744	1.24968	18.8884	0.711933	61.0987	43.7251	5.00681	6.93283	0.00933944	5.00168	72.7721	11.1129	3.65002	2.56141	5.0714	15.7134	10.2041	2.4916	0.924436	7.83724	26.8163	5.17465	6.908	1.92322	1.01162	16.517	729.425	3.89339	15.0099	1.45869	7.69588	9.16943	31.7888	50.124	19.1641
TCGA-CQ-7071	3.59178	0	2.05104	38.2986	8.69312	16.7294	17.4383	4.69548	11.357	146.233	6.97238	8.6701	0.508072	171.254	5.65482	0.771854	7.08823	4.78231	33.2594	22.509	5.37658	24.6662	0.012694	2.33603	32.4841	9.08066	6.01525	3.99491	3.8827	11.5229	10.7402	2.19991	0.995765	5.74071	9.49888	6.94073	2.84254	1.78879	2.35028	20.5792	601.126	12.0613	12.5782	3.32294	5.37797	15.4006	0.606266	16.1262	11.4501
TCGA-CR-7371	0.257534	1	3.13305	57.1268	12.6182	27.2037	19.6035	7.51046	16.389	43.3971	6.35169	7.03458	11.6641	123.885	9.49836	6.81735	6.65006	3.28968	76.8007	28.5094	8.70166	14.5409	0.0507047	4.92779	23.4262	18.3414	4.34308	7.77734	4.52024	11.6318	11.9679	1.79155	1.25544	11.7456	17.8209	6.63024	8.2421	4.77657	10.9609	17.5766	396.53	9.3848	9.1147	7.09734	8.71579	2.98296	1.61444	21.7727	9.84152
TCGA-CQ-A4CH	1.03836	1	3.08317	37.3151	16.0709	22.1931	7.24139	6.42244	8.41087	80.9778	12.5117	14.3692	0.961804	85.1662	6.54279	3.3365	17.0614	1.25202	44.3369	17.9662	21.5929	9.28875	0.00591282	6.54536	27.1632	13.343	5.66155	5.72079	6.18377	20.0546	8.97917	1.85566	0.310341	8.97278	25.7999	5.6822	10.0298	5.16039	3.52166	14.9687	304.955	3.61818	11.5372	1.12041	9.66416	4.24459	1.82886	296.829	11.9888
TCGA-CQ-A4CE	2.45753	0	1.81783	32.5358	7.94343	5.71685	11.7798	8.54861	2.21836	73.5343	8.70892	8.33229	0.948254	130.358	7.02126	0.478279	1.9824	1.1387	20.9137	14.0885	12.4578	25.9067	0.00620119	4.17199	13.4342	11.4537	3.20109	3.89753	2.5423	12.4068	5.63256	1.7664	2.855	5.28686	10.2932	3.94138	4.70549	3.84783	3.39608	12.9421	413.599	7.93426	5.55972	0.80365	4.36916	6.56953	9.4154	11.7987	8.0785
TCGA-CV-5436	1.6	1	5.76727	65.9644	6.53225	52.873	34.9995	15.0976	20.6413	215.22	11.2124	12.2911	1.46793	173.707	6.85171	1.05287	28.2181	1.70552	20.2031	52.3004	5.82033	39.8457	0.037152	3.13307	68.8779	23.0074	9.09496	4.28242	6.31148	8.15174	17.9965	2.8902	2.92848	3.60923	27.5492	5.84379	1.83198	5.41368	1.9316	22.3383	982.494	8.99838	2.99268	4.24887	5.36991	11.0048	1.59976	26.2091	26.8868
TCGA-D6-A74Q	1.94521	0	1.84797	89.2051	13.4911	23.8804	19.1064	15.2745	7.27561	28.9439	26.6514	11.6649	0.777485	95.2407	4.71626	0.616422	5.26354	2.15165	28.599	18.7717	7.03671	4.14496	0.0290261	4.52656	47.9664	16.586	4.95351	6.14418	3.7986	5.12955	11.6363	2.56333	2.16928	17.3467	25.3741	2.44698	7.04533	6.20543	3.87677	16.2048	526.366	12.2518	8.79272	1.77443	5.10214	11.1679	1.99098	16.3681	19.962
TCGA-MT-A51X	0.663014	0	2.25537	49.7982	13.8483	11.2818	14.7611	8.55914	4.52316	16.1425	7.86095	15.5674	1.55424	132.86	7.75017	0.901424	6.23095	1.09486	30.3425	20.8677	12.9191	18.2384	0.0245752	6.36437	51.8048	8.13001	5.46253	4.5681	6.66734	10.2224	6.29625	2.66638	0.539778	4.97038	15.6113	9.56885	4.75461	5.23284	1.09316	11.1189	558.378	9.59925	11.9824	3.17534	6.41404	9.29337	6.80198	18.1297	10.2851
TCGA-P3-A6SX	3.91781	1	4.59337	91.1671	24.1122	7.56749	22.39	15.4853	4.38518	104.252	10.7055	8.92927	0.423859	135.9	9.1839	0.524956	13.1895	2.9436	33.4835	45.4872	8.72572	6.9714	0.0101977	8.32834	55.6505	16.7307	4.6414	3.59875	8.71811	11.3197	6.91868	3.94591	0.23853	11.7516	19.1253	4.71413	8.77927	5.8275	1.37557	21.5587	1103.28	6.37328	10.6728	4.48601	8.52444	9.89304	2.72282	55.4199	15.6003
TCGA-CV-7263	1.53425	1	3.25127	34.1833	3.03357	10.6504	21.865	10.8925	10.0762	16.0088	10.6564	9.56588	1.5317	102.295	5.34555	1.20982	3.69361	2.00696	40.0958	25.3231	5.35127	4.69269	0.0415222	6.93179	52.297	19.2411	7.09207	6.33141	3.38231	12.208	12.1437	1.10483	1.26865	6.37523	18.3014	5.19805	5.10131	4.91727	3.39281	6.29859	501.894	12.8737	11.3645	2.07955	9.06622	9.91462	4.15508	35.5197	7.35935
TCGA-CV-7254	3.99726	1	2.68253	85.7439	18.3719	15.4656	16.9052	5.13982	9.1505	48.6041	9.8203	10.1546	2.6968	78.5939	6.81902	3.85544	7.31305	4.29801	65.2277	34.3822	4.25202	10.5374	0.0675517	4.86795	30.9355	7.31494	8.60214	4.58219	6.99412	9.85371	22.7226	2.19097	1.09449	9.00645	15.7975	5.56495	7.2185	4.80164	7.71891	7.71471	410.154	11.9695	9.17561	3.71453	7.91496	3.40811	3.06036	13.8784	16.017
TCGA-CR-7370	0.287671	0	3.40918	54.0795	15.4288	12.377	16.8066	9.83382	14.6464	56.8351	11.7658	13.0254	5.33387	150.396	9.37649	13.6841	1.4156	4.83482	158.078	30.5999	15.9549	9.65651	0.0369587	6.02763	25.8823	28.3963	6.70298	9.33429	3.58002	31.5905	15.2653	3.59655	0.674719	10.5237	21.5103	8.32817	7.95448	2.49974	9.97073	15.4386	357.474	5.73328	13.8328	12.5944	17.7174	0.943316	1.88703	27.9182	7.10487
TCGA-CV-6433	1.75616	0	6.11531	82.9937	8.49695	13.3768	24.9115	8.4423	16.0299	128.264	9.85285	7.92243	0.223905	82.2086	12.5783	0.699644	0.553757	2.95439	72.9042	34.5897	6.35945	5.67466	0.00661131	2.45193	49.3574	29.8385	15.2661	11.1506	10.1827	11.6073	26.6822	1.68601	0.441296	12.0149	13.6403	5.20983	8.69865	12.7136	8.74614	11.8437	592.712	15.2834	7.62011	4.44784	8.71912	24.5533	0.180433	7.34339	14.2796
TCGA-UF-A7JT	2.72055	1	2.92428	82.7671	6.86503	8.60616	30.5582	7.85458	10.7471	44.6425	10.9998	12.2421	0.458338	121.948	7.43938	1.20789	6.53303	1.19212	92.1086	43.306	8.17645	39.6201	0.0108268	6.26298	80.8953	14.7444	10.2433	3.94657	6.08791	7.71468	16.759	3.14994	1.10254	13.093	15.2013	4.25149	10.1311	3.50651	5.89174	16.6144	734.351	4.0487	10.0667	4.26522	5.28611	5.89602	1.13759	12.6164	13.0239
TCGA-D6-A4ZB	1.03014	0	1.14125	126.375	8.35435	16.8813	26.7708	8.22065	17.0366	179.664	10.0814	12.7417	1.95047	112.12	8.06045	1.01763	3.28696	1.50015	29.3536	27.1086	10.7022	25.626	0.0803612	4.39983	45.1755	10.7858	6.13738	3.51519	3.1589	10.6596	13.0953	2.073	2.76911	5.69365	27.7784	3.76015	9.56632	4.79245	1.78267	11.7814	666.1	12.9367	5.93424	9.60954	6.5907	8.0977	3.5164	24.4513	10.3259
TCGA-WA-A7H4	1.2137	0	4.15867	27.6508	9.49867	11.6228	12.3723	7.13427	6.56581	12.6601	9.75876	10.6359	2.90576	109.305	12.0491	3.62721	15.7409	1.86989	60.9223	37.2563	29.7894	8.0035	0.0883078	5.35228	81.5226	11.141	7.62147	3.58221	6.92126	16.1075	11.8723	1.98025	0.768291	6.73	28.0901	6.92808	8.87552	4.58916	5.59245	11.5239	558.309	6.07997	11.8303	2.35384	6.91976	10.835	1.9883	24.4084	24.7811
TCGA-IQ-A6SG	1.5863	0	1.90789	63.9936	14.7958	52.1686	28.0814	9.03366	6.6643	114.553	16.2727	13.2757	1.22195	336.381	4.45197	0.789461	5.30826	5.42363	25.2266	34.7197	13.7071	16.4503	0.00475315	3.0272	24.3758	18.557	4.2493	2.32164	3.59927	14.9716	24.0503	1.39986	0.311843	8.55844	25.3642	8.18102	6.56818	1.97239	2.17196	7.73732	771.737	6.09785	6.30253	1.52157	8.0434	4.77652	4.36295	32.7014	23.7572
TCGA-CR-7380	1.66027	1	3.8425	27.2383	10.8856	14.7887	26.9682	6.99184	5.45997	57.55	6.3994	9.42785	1.07394	130.693	6.41914	1.46449	21.0737	2.08778	60.3505	30.68	4.57417	6.24022	0.0193786	8.28246	25.537	21.4343	4.13387	5.77395	5.77414	14.3032	12.0109	3.42487	0.86233	6.02644	22.2557	6.34459	4.94648	4.28473	2.61212	13.203	436.545	5.12391	7.6947	2.02112	8.49699	7.27498	6.02326	110.361	23.2363
TCGA-CV-7413	0.805479	1	1.38918	29.3791	10.8875	8.81388	31.6937	7.44015	9.94803	51.2903	8.37415	8.48785	0.78201	145.171	6.42952	1.30628	4.52995	1.56664	31.7561	62.2993	4.08909	7.89427	0.0094952	4.14626	61.1566	6.84846	2.73679	3.54861	4.54153	8.08117	17.5501	3.8496	1.63323	8.84267	16.261	8.999	7.1444	8.43845	1.46182	16.8273	806.219	6.8537	5.09244	1.26241	6.033	6.29026	1.36912	19.2134	18.5876
TCGA-CR-7379	2.83836	0	4.65925	38.1005	11.7626	27.7403	25.1636	10.1727	11.6415	88.3738	6.57259	11.2644	1.74322	192.088	4.45415	4.75775	4.39402	0.674692	44.4945	79.9326	3.92527	7.96251	0.0152797	9.32273	38.7789	23.0191	4.30451	5.29836	4.54871	17.1919	6.74955	4.79747	0.284757	14.6988	25.2397	5.83973	7.48131	3.14448	4.32812	11.2576	787.727	6.64606	8.75753	4.27593	8.89834	4.36276	1.77459	34.734	9.81475
TCGA-CV-6952	0.506849	1	1.74599	35.4122	9.47745	7.8264	22.2044	5.61678	6.19053	35.6494	9.12758	7.78705	1.80667	133.138	5.64302	0.912582	28.7252	4.978	121.371	43.0119	4.42301	29.4385	0	3.8213	57.7867	15.9339	4.3525	3.43112	3.00964	11.16	8.12406	1.36879	0.715754	4.90884	23.3652	5.81063	4.7467	5.28148	0.873736	21.4692	621.401	4.83949	10.0279	2.26594	5.46839	6.55207	0.613526	22.7681	10.7145
TCGA-CV-6959	0.70137	1	2.75806	43.7768	6.74149	48.6788	18.106	6.01827	20.1064	207.238	7.08376	6.26243	0.543287	196.128	9.00194	1.57635	40.2813	2.89927	58.4405	48.8926	7.54565	7.26154	0.0199014	3.81786	85.0099	13.9719	5.34079	4.78704	3.72113	18.8842	8.77957	2.17056	0.876513	6.14681	18.275	6.04357	5.00605	5.97763	2.20739	35.3512	767.95	8.92242	10.6699	3.36214	7.47771	6.51822	0.590213	345.34	20.1621
TCGA-QK-A6IJ	1.06027	0	1.14405	117.579	3.35471	4.52534	22.1657	7.1071	15.4713	27.6124	9.25836	5.20033	2.62187	33.6012	7.64512	0.620184	6.83478	1.45125	23.9849	30.3049	4.98349	3.63459	0.0349966	4.43804	54.1192	5.68725	4.55911	2.41511	1.07466	2.00157	13.4029	0.494025	0.37136	12.8256	16.4791	1.60968	18.4021	11.5143	1.08364	4.66077	817.192	4.50416	5.08059	0.957678	2.47085	11.129	3.17097	6.0623	11.4032
TCGA-F7-A61S	1.57808	0	2.53171	61.8393	8.27519	15.1119	18.7998	13.2466	24.373	63.8255	10.4366	7.82411	1.19899	159.35	6.49038	0.963173	39.6106	3.93796	55.3852	60.6648	7.68531	22.9936	0	5.36953	49.5138	9.51504	5.23004	3.1857	6.41352	8.71151	19.7586	1.50285	0.964626	9.16516	20.957	4.38673	7.48243	4.96128	1.56579	19.4501	763.674	7.22418	10.8694	15.3325	3.4904	8.55013	5.49574	18.3545	18.4504
TCGA-CN-A499	1.96438	0	7.84816	33.913	13.65	45.1022	19.0119	10.3576	21.5116	110.139	14.9653	10.8145	0.800289	266.516	12.7761	1.41057	39.4078	9.74961	72.5011	33.22	17.2427	28.903	0.0903244	3.28417	78.9743	25.1608	6.81495	5.20983	9.12929	19.4126	13.0532	1.33324	2.7895	6.85847	10.5298	10.2765	4.45046	4.98345	10.7629	20.0983	1027.3	10.07	11.7063	8.04318	7.40635	6.42892	3.79624	26.0319	16.5463
TCGA-CN-A63T	0.616438	0	2.67477	52.7477	7.76637	26.0933	12.4465	9.9707	20.4845	95.4368	11.8705	8.5883	3.05537	158.563	5.7957	0.942348	3.49249	2.81191	43.4105	26.392	9.01733	6.8239	0.0125091	3.89096	32.8681	19.6958	6.36558	7.16916	5.39983	6.69817	11.709	1.33225	1.93754	13.8913	25.2108	3.46956	6.95202	4.9522	3.89861	24.9459	638.963	8.73273	12.0579	5.65132	4.23666	8.55886	1.10952	11.3291	14.8299
TCGA-CR-6473	3.08219	0	6.6682	75.9929	8.2767	49.1318	23.6367	5.43588	38.2195	175.864	18.9882	7.85657	0.919112	487.29	6.91865	1.53185	22.4422	3.02034	66.2502	40.0712	15.6738	1.74946	0.0408631	1.97943	48.6713	18.7588	11.5228	6.42075	8.78144	17.1423	26.0935	2.06586	0.384655	6.525	12.5704	16.3035	3.48474	4.1835	11.0359	19.7913	1248.66	14.5559	10.8721	5.53481	8.57507	0.293092	0.762065	29.1647	22.8709
TCGA-CV-6003	4.56164	0	3.46168	59.6004	8.08332	29.9438	14.1084	8.43075	17.8536	98.9149	11.7671	5.12052	0.994891	194.81	13.2533	8.25797	29.762	2.1612	85.0042	83.8568	4.79431	25.1151	0.0200916	6.79036	35.5136	9.33864	3.98334	4.19716	7.03775	11.5754	6.80367	3.03669	0.39545	16.0944	19.653	3.62857	14.4297	11.9898	3.22667	19.9853	1065.1	4.7812	10.8838	12.3603	3.94141	6.03643	0.594026	16.0347	17.6993
TCGA-BA-A6DJ	1.11507	1	1.3644	51.2501	5.75131	32.5536	17.0773	6.66992	3.06824	237.45	7.34747	11.9908	0.783295	103.489	3.31986	1.01501	48.3573	1.11745	115.965	18.9645	6.0035	52.2937	0	3.52966	59.2662	15.0784	4.16362	4.41066	3.83902	10.0464	12.7252	1.94229	2.09318	7.40559	16.8227	5.88586	3.95968	4.24865	5.77286	23.1131	616.973	6.95662	4.90248	3.86758	5.15678	12.3673	0.471156	13.0012	12.6818
TCGA-D6-6826	0.953425	1	5.36767	32.2186	10.4422	23.9096	17.5062	4.38626	15.9649	212.892	5.74273	7.86875	2.20683	173.427	6.93582	2.28626	40.7914	2.00942	66.034	45.7306	14.6162	6.01274	0.0106102	3.9798	112.888	17.5765	5.598	4.81732	8.31591	14.5659	23.412	1.81279	3.03262	5.48552	14.9318	8.73841	3.70135	3.16653	4.72781	21.1016	667.908	9.77172	10.523	7.33172	10.086	10.4907	2.6029	121.51	15.6472
TCGA-TN-A7HI	1.12877	0	3.84426	124.604	4.39241	9.36763	41.6335	24.1273	16.5203	20.5438	15.1705	8.44675	1.36351	95.8339	11.6317	1.22781	0.976966	3.93811	79.0164	31.6653	9.79205	7.43011	0.26244	3.24744	18.3283	13.2653	12.4647	3.65427	4.11383	2.95492	24.8914	0.702901	0.411737	18.6088	12.3089	2.72496	20.6169	6.39354	4.10607	4.96625	342.006	4.85143	6.57192	5.36365	2.64426	0.620778	0.71624	2.25032	8.31545
TCGA-UF-A7JJ	1.50411	0	1.24096	33.581	5.3703	30.9192	22.8435	6.90961	16.107	315.144	5.49848	10.4933	1.86923	120.842	6.02442	1.56287	9.0525	3.88539	46.4609	52.1208	15.241	37.7441	0.027458	5.42338	40.8275	6.3277	6.09586	3.50902	1.80994	5.89266	16.8517	2.45331	2.05731	7.25126	23.1672	4.89525	5.96809	7.01174	3.93382	10.8513	418.999	13.1626	6.09275	5.59995	7.10199	9.94773	2.68941	11.6743	17.4392
TCGA-CR-6478	0.50137	1	5.8256	35.2049	17.4705	27.0802	43.8526	6.84	22.0533	137.901	9.43091	9.76418	1.19574	261.367	9.83777	1.63433	25.878	2.24981	53.4248	65.9484	6.76928	5.26366	0.0885419	6.53974	82.0379	18.104	6.38991	4.88533	10.3528	12.432	16.7404	2.0747	2.4453	11.8239	11.8164	4.47848	8.48462	5.1669	3.62233	23.9185	1230.49	6.25502	12.2856	5.85786	8.77266	12.2383	3.55144	51.2443	25.2095
TCGA-CN-4741	6.13425	0	3.80955	22.7127	8.20121	9.9253	19.1744	11.3145	4.35108	34.4606	10.0081	12.3502	6.3863	98.1161	8.03115	0.665931	1.84391	3.70097	70.6182	29.7906	7.7387	14.2638	0.0847855	3.85949	42.3177	25.9431	7.31021	4.564	5.18343	20.4246	15.4913	1.66294	1.78206	7.41454	18.9138	8.99962	8.10278	7.70571	3.30226	6.54211	483.643	9.7641	6.6426	2.02523	10.2534	17.1508	7.62784	27.6498	13.218
TCGA-D6-A6EO	2.07945	0	2.7137	63.4224	18.2639	29.1178	30.8027	8.82377	10.5076	60.2587	11.7906	13.6801	5.74911	82.4459	10.8617	0.339128	2.9432	0.610437	16.1882	30.3441	7.74629	11.3011	0.0140399	5.15099	59.5987	21.1459	9.58712	8.43718	2.66353	34.5458	16.395	2.77038	2.22939	10.2296	12.2192	8.80259	6.23357	8.38749	1.32745	13.3855	515.668	17.173	11.259	3.06636	6.71516	9.38027	36.2182	24.7355	25.0894
TCGA-CQ-A4CD	2.8	0	4.20794	120.798	8.04508	33.0744	18.9347	7.08556	61.5851	667.679	8.88112	11.0485	3.00245	96.4432	5.03123	2.74029	61.242	2.13376	157.773	44.5314	11.2276	5.34131	0.00687565	4.79026	110.821	17.5422	9.78563	4.61825	9.16942	5.7002	10.3432	3.57039	0.741365	8.6143	24.6362	4.85308	12.1417	3.22785	1.62851	26.5031	771.534	6.56367	11.4888	6.6066	7.71893	8.00805	0.562941	24.1766	10.8188
TCGA-BA-4077	3.10685	1	3.98186	46.3116	9.24235	19.3476	33.8592	9.01066	15.5495	226.128	9.63322	9.81061	2.75474	183.338	7.07248	10.1742	8.83051	4.45401	106.67	52.1797	3.55937	15.0316	0.0200814	5.1158	76.3814	19.0905	12.6552	4.25565	6.24184	13.5083	20.1234	2.20201	2.3333	12.9048	16.5203	10.2569	9.31978	7.73375	5.01928	14.8046	1201.17	5.10287	10.2288	9.11383	7.22875	9.8158	2.0826	18.2395	23.3075
TCGA-CQ-5324	4.36438	0	2.33128	99.329	7.39571	36.3142	26.9322	5.67789	33.5192	77.5763	6.47509	5.99124	6.62032	146.547	5.95318	1.60628	43.0285	4.31101	34.501	17.7438	3.53203	13.2632	0	3.191	63.9184	14.3907	5.8955	4.79519	2.77931	15.5021	10.7198	1.38709	0.4527	5.56562	22.0383	6.926	3.97862	5.49387	7.90337	8.74721	866.369	8.13562	9.06344	5.4725	5.76588	10.6002	0.870115	17.8421	15.8945
TCGA-CR-7399	0.49589	0	4.99627	25.4019	5.93218	29.3235	32.0747	7.7977	12.7155	180.851	9.48549	6.526	0.683111	118.068	7.93304	1.18084	1.52676	1.17323	141.427	92.8476	6.36048	7.41618	0.0214027	3.91909	58.6764	13.0282	11.6267	10.1167	9.49017	13.8581	15.5012	2.32351	0.859602	8.66103	16.1589	11.5946	7.36034	10.5076	7.92538	3.9038	605.531	11.5269	6.58723	3.78373	7.68428	11.0685	0.186916	32.0424	21.0009
TCGA-CR-7367	3.94521	0	2.86726	30.6109	14.2061	19.0449	15.752	7.69673	7.62306	233.034	6.51717	7.7548	1.70827	102.91	4.12981	2.86352	7.43459	2.17796	48.865	31.0448	8.06843	11.9697	0.024599	5.13278	28.6592	15.8918	3.29805	2.41343	5.3687	20.0752	5.29664	1.99117	1.31684	5.87821	24.1577	8.39885	4.88051	2.98443	2.43948	11.9704	577.4	7.55169	8.33855	7.97407	7.95912	5.82806	1.95063	57.6204	14.8336
TCGA-CV-7100	0.750685	1	9.04507	50.7617	7.50292	14.8908	36.8039	9.03716	37.8648	158.297	11.0162	11.6294	1.98114	123.549	12.245	1.12264	36.8344	2.95201	45.2917	78.4762	6.70792	3.64211	0.0562601	4.10275	134.752	26.0419	10.1463	5.87851	11.2046	19.8856	26.0188	2.82753	1.41626	10.5659	22.3832	11.6242	7.368	10.0414	6.32953	24.3103	1048.78	13.7263	17.241	15.6097	7.39647	12.4407	2.80855	41.0356	23.7633
TCGA-BA-6873	0.334247	0	5.33377	96.5684	9.03012	11.317	27.7256	7.3309	12.6915	250.354	10.2579	11.2804	0.626589	151.475	6.04247	2.82328	24.2793	1.00592	92.6436	55.3577	8.81639	1.7095	0.0334547	6.1448	93.2146	21.6908	4.61701	8.68791	8.56541	15.9873	8.85624	1.71124	0.691866	7.85895	26.3368	6.90668	8.04457	8.21749	5.97669	27.5167	975.114	5.76699	12.0968	2.67736	7.0827	11.1005	0.69999	27.8082	23.9005
TCGA-CR-6484	0.969863	0	2.14209	36.4104	6.8766	17.9779	16.6048	7.74498	9.7934	58.9766	6.11472	7.04965	1.63495	82.9903	6.20389	0.959365	4.2271	0.804728	53.5551	25.8794	5.98839	18.4909	0.00575126	4.54925	25.9355	15.2302	2.22897	4.41512	4.03607	14.8563	22.1628	2.52259	6.47689	4.02665	15.0379	7.15453	5.47177	3.0582	2.18284	8.78484	523.005	5.74704	7.07833	5.79049	8.74662	19.087	1.57484	42.7484	14.2906
TCGA-BA-A4IF	2.45205	0	4.97552	63.0381	10.2841	20.6865	28.2614	9.79183	13.0986	199.852	11.352	14.5625	2.63015	104.963	11.0858	0.614418	6.43625	1.94423	16.5002	22.7446	7.83002	8.65427	0.0252805	5.29723	62.8737	13.5236	3.7565	3.24728	19.7531	16.369	6.04115	1.85604	2.14175	10.6707	13.382	9.50838	9.2395	7.21345	2.86244	17.2801	848.55	15.856	20.5533	12.175	5.41046	14.0247	4.60539	19.1514	21.1948
TCGA-CV-A6JZ	1.95616	0	4.24757	72.9459	7.14959	6.54569	27.2999	9.42904	30.8547	97.585	12.4453	6.661	1.62503	110.862	10.1014	0.907259	2.76919	1.71815	164.361	29.8997	8.29718	1.51558	0.0351873	5.34253	80.1179	15.1644	5.55803	3.83864	9.45096	9.32618	11.166	1.04961	1.2672	7.05037	23.2693	5.54739	7.88963	7.51988	2.81787	7.68596	741.562	5.77566	9.87436	1.2127	4.7969	0.767213	1.26041	24.5465	14.6822
TCGA-BB-4228	1.53151	0	7.9356	80.0663	14.2477	68.8732	26.2929	9.09557	12.5068	86.3611	12.8976	9.78129	0.915893	203.09	10.3196	1.40498	2.19411	6.04518	55.2954	12.8771	11.7055	10.9985	0.0454749	4.62034	17.4002	20.9624	13.1997	7.68765	10.6514	22.8649	17.9358	3.01626	0.395638	12.1203	10.8083	11.6147	6.86569	11.232	10.1403	9.66217	366.173	20.0505	14.7273	3.61585	11.4078	19.9814	0.801531	18.9289	29.335
TCGA-UF-A71B	4.12603	0	4.85232	113.034	8.92179	21.1604	27.2398	10.3449	10.0496	31.8107	12.2688	15.4108	0.654028	89.8033	9.79043	0.748188	6.27369	3.24704	25.5882	52.0877	6.35449	7.74967	0.00827642	4.44403	62.8157	14.8047	10.9167	5.91141	4.33117	12.1292	11.6239	2.38186	0.476892	13.5438	27.4383	4.09748	8.70966	4.51049	1.99376	16.7952	783.798	4.60411	12.1267	16.1487	5.89962	6.79767	2.80086	21.9498	9.8984
TCGA-DQ-7592	3.13151	0	3.12574	28.9802	7.2392	27.3162	18.4073	8.53869	9.31004	169.016	6.72509	9.42168	0.97199	133.565	5.42601	0.795595	17.7719	1.46399	56.0024	25.6456	7.20123	2.86399	0.0118388	4.16016	95.8469	13.0481	4.06776	4.10642	3.49901	21.0813	9.98382	2.30953	0.628129	3.97914	32.5765	7.38072	4.8946	4.87275	1.53197	13.96	435.916	8.59956	10.0221	2.97888	7.54795	7.47789	1.01238	42.9319	18.5215
TCGA-KU-A6H7	1.60548	0	3.62305	185.276	5.3135	9.4645	56.6888	8.56401	9.236	131.612	19.8822	8.41691	0.358513	103.186	12.3837	1.52514	0.849441	6.47517	52.6934	31.3422	4.98665	1.60001	0.00557783	2.50156	52.3813	12.6637	10.9601	4.69416	4.35216	6.0709	36.4541	0.974064	0.632645	7.28687	12.7924	3.6796	10.3507	7.20749	1.65505	5.89377	980.86	2.45164	5.32586	3.11368	4.2871	16.1498	0.397849	7.55947	9.29546
TCGA-CQ-6218	3.43288	0	2.29671	37.4907	9.59315	18.2325	19.0729	5.31436	7.42923	45.118	5.97742	8.51457	0.985476	126.129	4.00843	1.14201	10.0933	3.16031	43.9684	32.3498	2.96373	20.2092	0	4.72034	34.0512	12.0388	5.25333	3.22008	4.50976	10.9904	6.68473	2.039	0.974206	7.16242	18.7999	6.91586	5.24682	5.03429	2.35826	13.28	648.68	7.62137	4.58942	2.15658	4.95442	6.47737	0.499174	17.6514	9.73744
TCGA-CN-A6V3	2.03288	0	3.14058	50.9847	9.42949	23.3465	29.7015	7.43431	16.577	339.384	10.4775	10.0304	2.68439	147.981	6.40735	0.510346	12.7278	3.99286	83.655	29.3582	10.5641	21.7295	0.0549092	3.42856	74.9967	20.6807	7.0475	5.09183	6.04308	15.1626	10.4804	3.44147	0.546777	8.9964	13.7056	7.96641	6.01175	4.12335	6.49691	22.9336	679.452	11.6971	9.17497	4.86342	6.04268	14.6238	1.27604	27.9089	13.5773
TCGA-D6-A6EK	2.39726	0	0.758847	115.092	5.07196	4.0144	26.2398	4.76123	8.19065	58.1013	6.91633	6.88417	0.754859	69.6281	2.95964	0.163677	1.27938	1.76702	20.7206	16.9038	2.29826	28.1549	0.00786668	3.62059	25.0845	4.60906	3.2666	2.20618	1.16989	2.39408	15.6935	1.10057	0.345572	7.00983	12.4125	2.47129	9.38287	4.21981	0.768019	6.79216	738.53	5.10554	3.90102	1.53127	2.17732	11.4313	1.43845	4.85475	13.2971
TCGA-QK-A8ZA	1.01644	1	5.40034	47.3057	6.35662	9.68205	21.6087	11.1938	4.30398	14.7153	8.7205	11.9711	4.71514	87.8971	6.09657	3.35759	43.2702	1.7915	111.648	11.3728	14.4959	3.33062	0.0341593	3.76453	34.5559	16.9251	4.3944	6.31094	4.71203	11.6074	21.2478	1.92021	0.923728	9.00572	20.7421	3.98905	5.45354	2.93071	9.54704	5.29442	596.21	6.61102	16.8227	17.8134	8.08112	12.3672	12.0386	25.4486	13.2127
TCGA-BA-6871	0.29589	1	4.11213	96.1223	10.974	32.8599	36.0563	7.29298	9.37576	185.49	8.20241	18.6456	1.85453	144.059	10.7509	1.12939	4.10179	1.17512	39.0576	43.3821	12.554	8.73043	0.108132	4.6331	40.1223	13.4992	8.45199	4.87383	6.84018	16.8359	14.8498	2.43048	0.503006	16.0428	16.8608	5.89308	10.1526	4.1348	2.68847	7.53812	592.51	13.3331	7.53961	15.8666	8.08997	1.54418	3.52239	12.1253	7.81165
TCGA-QK-A8Z9	1.23014	1	2.55509	29.9585	5.58136	14.4845	21.0914	9.53571	18.9558	25.2916	11.1913	12.3551	1.70207	64.2495	7.05837	1.15552	12.0446	2.26271	69.16	62.2116	9.05146	1.83591	0.0766935	3.51718	138.765	13.4366	10.4698	1.939	2.85136	11.3683	7.7401	1.5681	1.11207	4.28195	35.5956	3.98585	5.94707	4.7419	2.96843	15.3419	657.439	6.1143	12.2925	3.46485	7.95392	9.17005	8.23279	145.854	16.7804
TCGA-CV-7095	1.56712	1	2.90543	78.8383	6.4955	36.1523	37.6759	8.68981	18.8183	176.624	5.98585	11.9624	1.46349	108.4	7.11217	0.664789	21.5033	2.40673	54.7533	52.0512	2.41998	7.39666	0	4.47201	52.6882	11.8946	6.07825	3.29908	4.46908	11.8858	10.5628	1.56267	2.12197	6.90142	22.5625	3.57137	4.04867	8.75385	3.01046	11.9532	865.813	8.02447	5.36043	1.08915	9.82179	9.87417	1.1	121.225	18.3013
TCGA-CN-5358	0.715068	1	2.29807	15.9353	11.4254	15.4412	17.1762	4.74787	8.45247	18.9595	7.99	8.98172	3.1771	76.3794	6.51493	2.0951	24.0399	1.03059	53.1623	29.5058	8.82639	8.78163	0.0509824	5.29402	41.4974	15.7543	3.27468	3.20807	3.11469	14.7546	14.6007	1.70402	2.35593	4.41199	20.4081	8.11309	3.72002	3.17536	4.12327	10.4621	407.518	5.11589	8.2135	2.17312	11.2253	6.21124	2.79824	27.3929	11.9152
TCGA-CQ-5326	0.243836	1	5.62045	69.1875	13.2599	15.1097	14.2851	7.57278	20.5637	454.801	10.3565	8.33118	5.61123	161.383	6.5928	4.70925	27.7543	0.911033	45.1216	78.7609	5.7019	2.80229	0.00447429	4.69474	76.3258	15.8837	5.15847	5.57162	7.215	14.2224	9.99689	1.66737	1.45242	14.8686	8.51755	7.12577	6.96152	5.0231	1.97991	18.2904	1307.98	3.8257	12.1791	14.8751	9.68761	6.40336	0.60648	58.6986	18.0264
TCGA-P3-A5Q5	2.49315	0	4.11678	33.5662	4.6655	7.0854	28.9329	7.9227	8.31303	41.578	14.4621	11.2683	1.02277	73.2433	9.92585	0.623732	1.09521	5.46172	37.4137	16.4516	10.1409	1.95365	0	4.30606	11.3784	11.1921	7.399	5.63657	5.08916	10.8303	21.9581	1.53734	2.78919	13.3742	12.9597	4.51705	12.0057	5.71183	2.44285	1.96015	564.474	6.861	8.49568	0.616215	7.38376	0.549173	0.821186	7.47745	10.2684
TCGA-CV-7432	7.0411	1	5.15788	83.1766	11.1049	19.0627	22.3428	7.32077	14.1867	65.0219	10.2247	9.30262	1.21828	217.542	9.5239	1.70162	17.0829	2.45638	24.711	30.3686	4.21786	13.7537	0.0049155	4.67341	71.9516	24.21	6.77977	5.73524	11.2061	18.885	6.31534	1.97222	0.605729	6.39726	29.2449	8.14772	4.69945	4.44307	1.8486	18.0667	1387.75	8.81104	11.5431	29.5242	5.79764	7.13383	0.478475	31.8325	27.0327
TCGA-CR-5248	4.55616	0	6.50651	45.8442	10.0486	16.4783	28.8118	9.21914	7.02564	48.5407	8.74021	9.19299	0.806148	121.063	7.82907	0.891867	1.03801	3.41572	54.4087	22.3335	14.256	3.60734	0.0228789	6.92869	25.4485	24.8259	6.15971	7.14612	9.12832	19.884	25.7194	2.2204	2.47997	10.5	14.5926	10.4879	11.211	8.28863	5.66124	3.80958	1013.34	11.3551	10.9481	0.311071	10.2392	10.031	0.63134	13.7897	19.0265
TCGA-BB-4223	8.82466	0	5.59366	36.4724	10.7304	15.7729	27.8112	7.50583	7.9264	85.554	12.2137	9.41648	0.996818	85.3307	12.4387	3.03138	1.36113	6.2245	62.6234	19.7162	21.0933	10.1793	0.119544	3.29676	44.6232	21.3086	11.534	14.0044	12.0362	21.3622	14.8283	2.09372	0.792828	7.25842	15.685	18.8812	5.38335	5.16542	9.09858	6.62904	421.009	12.2382	11.5313	2.28375	8.43143	0.697807	1.5769	20.3897	12.7101
TCGA-CV-7434	0.59726	1	1.48684	59.945	6.67781	13.5124	33.4554	6.33336	7.22855	190.975	16.7581	10.3661	0.822982	133.836	7.88977	0.60014	12.0631	5.7038	60.4729	30.252	4.24885	29.9181	0.046087	5.17957	57.6432	33.0265	2.52163	8.12225	5.7609	18.0835	9.25981	1.51996	0.985976	4.73198	25.1378	5.43691	5.85523	5.63327	3.39721	25.9408	878.95	4.96615	9.86619	2.72459	6.00643	5.91	2.49042	42.3181	9.69395
TCGA-CN-6017	2.33699	1	1.37255	22.6651	4.67586	34.0007	18.8231	4.30544	7.09658	30.5929	5.47569	4.93349	2.53796	65.7789	5.72613	1.96683	15.9928	7.64313	59.544	27.5001	6.59717	14.445	0.00766819	4.57613	40.1031	13.2007	3.08428	2.9584	2.90949	11.8856	12.7267	2.09084	1.46115	5.52288	21.8734	6.07316	5.85423	3.6238	3.40653	8.12135	409.128	3.92344	7.26762	2.55766	8.99591	3.64406	1.93232	12.5083	29.6188
TCGA-BA-5556	1.9863	0	1.96937	31.8835	9.28844	19.9966	22.5676	5.5738	11.8959	54.4025	6.07072	7.95272	3.03577	118.651	6.4509	1.88028	16.9668	5.70779	98.7325	23.7401	5.3296	29.2096	0.0177528	5.09725	49.6406	22.39	5.42039	3.77019	5.2338	13.7444	9.33231	1.96158	1.2584	5.93216	16.2431	8.90373	4.03713	2.47401	5.24828	12.5699	615.277	6.14794	8.83931	1.3245	7.7798	15.8752	11.1273	29.2951	18.8835
TCGA-CN-4740	2.29863	1	3.86149	29.8363	5.25241	31.876	19.3879	6.35332	10.2269	83.7592	6.52834	9.75049	1.77437	91.0708	4.63027	1.81709	8.77045	1.7826	63.6523	38.3572	4.66961	4.53677	0.0420555	5.16615	16.1495	11.4017	5.47108	3.20637	6.13406	10.9673	19.3292	3.11559	5.89154	6.2771	13.5261	6.59031	4.47828	3.88903	3.79272	8.37322	573.195	7.92034	7.27068	4.63233	10.1288	2.6442	2.09147	16.3385	17.702
TCGA-CV-5979	3.60274	0	2.87334	86.8243	5.52926	27.3477	16.5481	6.11809	19.329	238.721	8.4718	8.02218	1.07157	188.302	6.54645	2.41867	47.2535	3.03658	86.4304	88.7549	5.11628	15.7668	0.063281	3.08089	139.179	11.248	6.92291	6.89454	3.60247	11.0389	8.2164	1.93596	1.35546	5.1744	42.2302	3.72121	6.84825	8.92181	1.66499	24.7666	1082.58	9.91683	9.97953	2.94059	8.99761	7.25075	0.334941	31.3088	24.6816
TCGA-KU-A66T	1.51233	0	6.55548	51.2686	5.56175	25.9122	20.1423	9.55909	8.89441	152.601	8.93782	13.2083	0.878064	186.354	8.70628	3.19657	43.9297	5.38633	31.3489	150.143	9.77501	58.9415	0.0264887	2.86327	66.5387	8.98868	6.2545	5.63106	7.53355	19.1443	14.5324	1.71382	1.30264	6.89471	11.3129	2.98093	5.7779	3.00678	3.03596	32.2398	989.926	9.17965	10.4037	5.36397	8.22153	11.9088	1.09884	121.234	21.6759
TCGA-BA-5559	5.70685	1	4.68173	33.2648	6.09975	14.7387	25.667	7.23287	10.7665	36.8052	10.8906	7.77418	0.988367	107.125	10.203	2.13584	3.07126	7.31449	92.7412	27.7653	19.7994	33.065	0.0513634	4.64782	46.1121	27.4242	9.43049	5.83914	5.04415	21.673	18.3737	1.62384	2.91076	10.8973	18.9793	16.6803	6.51565	5.48178	10.588	8.29753	445.24	7.71944	9.59764	1.54036	11.1859	4.70501	0.716469	20.2416	15.311
TCGA-IQ-A61J	2.79726	0	1.56174	28.1087	6.21558	10.3331	13.0986	7.21037	4.41671	32.8199	7.52565	7.29261	1.30466	99.6107	6.37592	3.54396	4.43664	3.79961	42.3287	23.8	11.5789	31.2898	0.0215467	3.36624	40.782	10.7081	3.57887	3.02298	1.9962	7.60879	7.16833	1.93496	2.04976	5.44958	19.6213	3.55578	4.51868	2.8937	0.855752	13.2072	504.479	4.08792	10.5784	1.30997	8.85654	5.95326	2.6952	23.9274	9.82604
TCGA-CN-A6UY	1.95342	0	2.88284	90.2826	6.22251	32.0269	31.6285	11.668	13.099	52.2491	14.5135	8.5033	0.198257	88.9596	11.6111	0.325177	0.435634	4.27934	36.383	22.13	7.69327	18.4909	0.104021	4.85232	74.4703	10.8729	8.79609	5.47511	6.80294	5.85183	35.0863	0.724208	0.267048	12.6317	15.2904	3.75725	11.3966	11.0544	3.45526	11.516	967.312	9.0677	5.51339	3.50251	4.06243	33.3904	25.8812	17.3145	15.41
TCGA-CV-A6JM	0.531507	1	1.54411	145.161	4.28383	6.94306	26.7896	6.88788	13.2564	55.0446	16.7773	16.5783	0.522665	47.816	11.2609	2.03468	3.36485	0.463265	18.0832	52.0307	2.14842	8.04035	0.146506	6.01919	12.4813	3.82123	4.04437	2.49147	1.36839	1.91451	14.5923	0.656552	0.167164	17.0372	10.5565	1.37787	40.0838	3.26433	0.822169	7.19695	1009.39	1.56197	8.51734	3.05097	3.53666	0.249131	0.539465	6.79529	11.1987
TCGA-CV-5443	7.6274	0	4.38495	42.0406	7.84938	27.2297	44.8596	9.32078	18.0199	102.405	14.6083	9.4389	0.897345	126.52	12.2477	1.32069	1.76667	6.69485	66.0085	47.9186	9.95143	8.23682	0.0552235	5.00035	39.237	22.5444	11.4207	3.08133	10.8465	19.3658	15.4433	2.02623	0.756122	11.6855	24.218	8.45454	8.1266	11.2644	13.1596	11.5785	803.1	12.4841	11.923	1.29259	8.61659	22.4846	0.577735	31.6287	26.1735
TCGA-CV-6951	2.50685	1	1.42262	48.6807	9.46994	37.0257	18.0627	8.2409	14.7653	55.3223	7.41939	12.5433	2.74463	127.176	5.33455	3.44038	0.808176	7.77662	33.8851	16.9401	6.08677	4.48909	0.0169443	3.99464	43.0534	12.6923	7.31193	5.01964	1.6345	11.0572	8.71592	1.4641	0.21589	4.05848	44.024	4.10641	5.07217	9.24308	4.60386	7.41068	644.965	18.3089	8.24521	4.04479	9.76901	1.93419	4.30578	39.5921	12.4788
TCGA-D6-A4Z9	1.47671	0	5.11451	39.8306	11.3385	11.1441	24.6773	8.93284	6.21502	32.1571	13.9797	8.30886	0.635294	112.458	12.3917	0.468679	11.7725	1.09394	41.2488	54.1066	8.49412	24.5648	0.0248856	6.17769	57.9685	21.8804	7.18288	5.70571	9.16711	16.9065	14.9261	1.50555	0.841189	7.63831	17.0864	7.3147	9.70151	3.85553	2.23908	21.5692	700.213	3.14047	9.75843	4.57742	6.54943	9.88357	0.62257	26.3215	13.038
TCGA-CV-A6JT	2.33425	0	0.511229	86.2593	5.5178	4.58903	24.8342	6.32286	6.29104	20.2034	6.41324	7.82918	0.636026	50.1087	3.48388	1.79719	4.38464	4.72917	46.1513	31.7754	2.83339	1.99411	0.0324473	3.73113	56.6279	3.7996	5.25204	1.70828	0.568612	1.20199	12.0974	1.27596	0.399842	4.38044	26.4165	2.12896	10.8498	6.41645	0.832252	12.595	610.288	4.64402	5.36927	0.861111	2.53664	4.94376	2.20203	57.3681	15.7885
TCGA-BB-8601	1.70959	0	4.17287	341.169	11.1102	14.5017	15.3491	8.19187	3.25015	14.991	17.0233	16.4639	1.49608	234.438	9.95429	1.65574	2.95725	4.06747	16.542	26.4079	6.80548	17.6876	0.0352333	3.00019	17.1341	15.8566	5.35014	9.95283	9.36772	11.5823	12.0149	1.29522	0.125629	7.00795	16.0059	2.78462	7.21521	1.59783	2.28981	15.9652	672.255	11.9294	13.3255	3.81114	8.00671	0.149207	5.00818	12.7231	8.42899
TCGA-MZ-A5BI	0.594521	1	2.85638	143.083	6.73845	38.2418	41.2011	10.5975	13.5879	50.0654	10.592	8.5717	2.15031	85.655	13.5399	1.25586	1.50695	6.82688	32.0042	30.7765	8.44857	29.0196	0.157426	4.74271	57.8331	7.9112	11.3406	4.31107	4.48344	11.769	20.8372	1.23775	0.624405	12.9204	14.1749	6.50355	9.84588	8.3868	2.85821	5.18764	713.417	10.2299	7.17222	6.90896	4.37175	4.64355	5.95358	8.67793	11.4651
TCGA-F7-A50G	1.68767	0	1.55292	19.8733	5.35442	15.5267	15.5983	7.1336	4.54537	63.6267	5.35319	12.2654	0.778415	61.7964	4.6236	1.10392	3.492	10.8368	87.2325	22.1131	9.06656	71.6242	0.0185752	2.27018	30.3857	10.0621	4.40613	2.56635	3.08592	9.44769	5.46202	1.80272	2.41969	5.97364	10.5524	3.30341	7.39947	2.98391	4.12058	17.9874	465.186	11.8173	6.75827	0.664956	7.5344	11.1546	6.54523	13.2484	8.30566
TCGA-DQ-5629	2.57808	1	2.30377	94.6665	17.9328	13.1364	23.1413	7.17163	11.8449	144.116	7.33295	12.7604	0.988263	168.488	8.71406	2.32733	2.41787	1.55663	40.1562	24.2258	7.24899	6.78116	0.0197194	3.46469	7.98219	18.0894	5.48032	3.82969	6.17686	20.9457	15.1552	2.90793	0.108749	9.98583	18.0574	5.354	6.02491	5.1277	2.92006	10.6487	486.81	11.9448	10.564	15.9951	10.3923	9.31383	3.66555	53.7064	11.3089
TCGA-CN-6998	0.978082	1	1.70235	29.0515	5.68349	32.6258	20.9896	4.99412	2.69545	72.24	4.89825	7.71042	0.713502	168.024	5.01538	0.873596	6.34335	3.59689	74.1714	19.42	3.43589	78.6005	0.00384108	2.74095	37.3633	10.3909	3.94681	2.46635	2.24167	14.217	3.79026	0.864972	0.418546	2.90801	10.7572	7.53528	3.64105	6.4504	1.38019	16.5293	997.009	10.1325	11.7184	3.56187	7.0763	4.16243	1.01684	23.3124	18.1139
TCGA-HD-8635	1.90411	0	3.94008	38.2422	9.22712	19.2238	24.9411	7.04333	10.5773	40.3915	12.4544	9.19459	0.873414	98.7778	6.79574	1.71589	17.6889	3.28111	47.1539	69.2071	10.6546	3.35738	0.00788013	3.73769	145.52	12.4121	4.28591	4.64827	5.10563	15.4848	14.009	2.41017	1.98257	4.98918	46.6518	5.2905	6.5189	4.63808	2.91345	19.1185	1045.9	5.92605	12.0062	1.61526	6.94106	8.47085	0.774219	25.6483	25.7679
TCGA-QK-A8Z7	1.07397	0	4.59365	61.3797	5.64375	10.731	11.8627	14.7727	14.9174	57.1192	23.3349	7.01737	0.922473	73.0187	15.9865	0.574797	0.854712	0.414864	31.264	12.7835	13.0914	12.7735	0.104215	3.66242	21.4246	25.7011	9.46106	4.55783	4.00024	14.549	11.218	1.47497	0.193229	15.4373	17.6337	5.55145	14.2	4.36614	11.7473	7.73717	219.17	18.7521	6.74665	5.36738	5.19326	12.0681	0.639944	212.732	2.40349
TCGA-BB-A5HZ	2.26575	0	2.24356	60.0733	12.0301	22.6908	15.929	7.3888	6.6714	98.6586	9.2061	9.67691	1.05824	109.29	4.03402	0.897633	3.60347	2.69463	15.8878	26.5951	8.08212	0.598111	0.0412459	3.95725	19.1989	10.4735	5.87696	12.9784	2.26014	19.3805	3.23095	2.55309	1.4393	8.16358	16.1485	4.6289	5.77457	6.40094	3.6972	18.3196	626.408	13.1201	7.63918	2.18284	5.55442	7.43685	0.719175	13.0526	27.9085
TCGA-HD-7754	2.14521	0	5.12829	26.0336	11.5861	17.3019	26.882	6.59677	11.2282	154.386	9.20399	35.4691	8.46085	72.4357	9.21256	4.00032	2.76053	2.05408	41.4258	25.9513	8.36849	2.08345	0.0285409	3.17921	27.9738	19.8441	11.4664	4.23534	5.17855	18.925	11.7985	2.21489	0.718762	12.0332	16.404	13.0869	6.80268	6.95496	11.5673	10.5517	314.615	16.1571	11.3218	5.53239	14.122	1.1704	3.26407	13.4061	12.3801
TCGA-H7-A6C4	1.13425	0	1.27855	22.5893	5.76565	24.1794	13.6188	5.66617	4.7154	135.027	6.2072	8.14259	0.670073	84.5358	3.4182	0.753067	5.0419	3.90516	42.194	34.6239	4.21972	23.5093	0	2.912	50.8428	8.6353	3.31078	2.78273	0.930125	9.23989	10.7647	1.31252	0.39921	5.13121	19.7922	4.31631	5.58093	6.38302	4.20791	12.4133	381.073	5.28256	6.2219	2.85338	5.62646	4.46236	0.466155	186.041	11.2783
TCGA-UF-A7J9	3.72055	0	1.85849	111.232	8.84527	31.2089	17.1112	8.47079	23.0227	345.002	10.193	6.63065	1.85641	124.046	8.22193	2.20588	5.13254	2.47493	42.0299	49.2932	8.90997	9.19817	0.0321104	3.54401	30.8674	18.4154	11.0853	3.80146	2.45648	10.2271	18.4684	1.53568	0.992282	8.19305	20.5369	5.31326	9.45063	2.78326	2.57224	17.5117	293.613	11.0301	11.2646	4.75271	7.81938	3.83692	1.9669	21.1462	9.82026
TCGA-CN-5367	0.964384	1	3.21839	32.6214	9.98908	10.2726	22.1075	8.02107	2.78388	19.4195	11.1968	8.91391	0.710577	168.72	13.7304	0.79861	2.63119	0.491959	31.5006	34.6159	6.35695	6.69357	0.0144247	5.30231	57.9767	27.1118	4.69004	3.64183	6.21131	21.6821	11.7682	1.76151	3.42065	9.65627	19.9599	5.7233	7.0627	7.34459	1.47772	7.99886	731.543	10.8841	10.626	1.54168	10.3196	13.712	2.06022	26.1904	16.6825
TCGA-CN-6994	3.2411	0	1.58893	53.4858	8.02501	33.7622	18.4073	9.84174	9.3398	99.5522	8.29209	8.47002	1.19612	166.493	4.01175	5.36779	3.91315	5.678	58.0541	23.7562	10.2443	48.8495	0.033017	4.08012	24.4181	15.6471	5.41954	1.90772	5.49932	10.457	6.87193	2.74377	2.29049	3.68313	15.3283	7.55813	4.35945	9.37211	2.90681	9.24214	677.08	15.6642	6.81015	9.27373	8.29186	9.10883	5.29838	38.0256	21.5726
TCGA-CV-A45O	2.33151	0	0.79185	13.0027	5.70699	24.933	10.9757	3.59492	2.49707	177.432	3.89715	7.29538	0.48188	65.2008	2.28316	0.153127	0.531715	4.91031	36.8122	7.5848	7.23804	38.4092	0.0131341	1.60365	15.3663	5.19906	3.00497	1.37979	0.522621	6.16797	8.59337	1.00704	0.498286	1.26495	12.0864	5.61889	3.63446	1.79968	3.72922	13.2452	235.815	12.696	4.83171	0.8375	4.28254	3.83032	0.256889	8.87171	4.89734
TCGA-CV-6934	0.178082	1	1.98151	37.8805	5.12489	27.5041	14.8208	6.1333	13.2943	167.073	7.23282	7.42897	2.75093	115.512	5.82041	3.01331	18.3698	3.13637	74.3058	51.2121	5.64186	2.71664	0.0445894	3.38412	32.3382	12.1737	6.11039	4.72468	1.30416	6.81377	10.9828	1.87766	1.71219	3.78598	34.3869	5.53302	4.64817	5.62379	3.89552	13.9804	454.039	7.07394	6.76963	6.21425	9.56494	5.67979	3.08909	32.8116	13.596
TCGA-CV-5442	6.37534	0	2.52325	37.2319	15.0841	18.7492	17.282	9.00503	5.28517	41.5703	9.1073	11.5853	0.0764358	225.504	11.7761	0.501831	0.189861	1.97915	23.2718	25.1675	12.3132	0.836294	0.0518115	3.40916	41.0533	29.8439	5.58953	5.33547	2.72282	27.468	11.9448	2.09513	0.19213	4.28487	15.0482	6.52859	2.59994	2.52613	2.8584	10.4683	882.597	11.8136	7.28429	0.123724	9.21108	3.95834	8.36625	34.5561	15.6517
TCGA-BB-4227	0.367123	0	7.41069	58.3234	13.7003	33.8474	21.6793	9.7804	15.386	620.201	7.82615	18.2377	1.99083	205.347	11.6512	1.47635	24.8424	3.32944	50.5634	74.5425	11.7288	3.52093	0	4.7259	9.38796	9.4406	5.19902	5.01222	18.339	6.88474	15.4178	2.67138	0.146022	7.08506	12.9238	3.91501	7.66655	6.08303	3.38915	18.021	754.602	15.7281	6.92234	2.6396	11.5618	12.449	0.74756	21.1817	22.6299
TCGA-CV-6945	1.00274	1	1.73058	97.2629	7.32413	16.6347	28.2534	8.35012	30.1233	297.459	8.36126	6.47906	0.757985	145.541	8.27334	0.32095	15.56	2.48806	19.1207	47.0882	7.2997	76.553	0.0279589	4.71233	43.5265	6.21943	6.59404	5.0585	6.10947	5.6774	14.6845	1.76	0.645998	6.5562	37.4008	3.64731	10.2184	3.17075	1.6663	9.8234	654.479	6.60536	6.19551	14.4357	4.33756	5.97981	6.79106	23.9964	13.0566
TCGA-CR-7401	2.95068	0	1.99343	53.1083	7.19511	15.7373	23.98	4.99905	5.15022	13.4266	5.16335	6.91476	2.74137	116.689	5.11472	1.74242	15.1942	3.38798	31.3398	41.7282	3.75138	7.32972	0.0107818	5.92207	81.9639	11.7474	4.24883	2.36624	2.63045	8.97249	8.89585	1.92967	0.894973	6.31164	21.2713	4.00159	5.45417	8.49481	1.37962	12.2095	705.37	8.53024	8.50902	3.01444	7.24311	9.30706	3.45255	20.2073	14.542
TCGA-CQ-5330	5.19726	0	2.87281	31.7829	8.05247	13.8594	17.4634	13.0976	9.19772	27.4523	8.59683	5.75805	2.403	105.246	7.83875	2.40652	30.194	3.21181	70.4979	56.9252	7.32939	5.69975	0.0152291	5.08	73.2269	20.7547	7.12978	4.81114	5.34368	13.2768	11.9135	1.34682	3.11473	5.21642	30.3605	7.43869	5.10651	4.93824	4.10852	9.07655	757.33	7.46255	10.0625	2.43755	6.36328	7.96923	1.83568	50.4044	16.7351
TCGA-CV-6941	0.936986	1	2.89123	43.9245	12.4215	33.5476	18.7611	7.61265	13.1213	247.354	10.6269	10.5499	1.74522	152.428	5.43805	3.04925	6.89347	5.1298	63.1351	55.337	7.9232	4.67917	0.04154	4.97696	30.2986	14.3961	5.85968	6.41739	3.90692	14.7698	14.1738	2.51966	0.423613	8.27977	15.804	6.54204	8.39226	4.59238	6.08329	38.693	530.292	11.4936	7.50084	3.56839	8.65577	2.79801	4.44029	78.0752	14.1836
TCGA-CV-7407	2.96164	1	1.93954	102.131	7.5543	19.3596	27.9894	4.69179	5.29767	35.1228	5.41723	21.868	1.21127	114.312	5.18438	10.4205	1.75703	7.10106	43.6754	34.716	5.18431	22.302	0.0332469	3.08841	94.3869	11.7085	8.32202	3.01527	5.10465	17.4973	12.5845	1.29903	0.80205	5.91875	25.2628	5.69122	4.00075	8.50849	3.10045	9.89723	664.396	8.14497	5.64068	8.65656	9.78085	16.8867	2.13013	24.6858	19.6498
TCGA-P3-A6T2	6.29589	0	3.69142	53.7613	7.79776	9.45057	8.94943	6.53888	13.233	264.801	11.4675	9.0385	0.50004	109.801	10.3636	0.830989	26.8029	0.601812	88.668	31.1438	7.37818	4.82953	0.0111369	5.4	40.9904	23.8106	5.33182	4.07979	16.6025	12.52	8.08548	1.95814	0.184255	10.8099	14.1661	7.43272	5.65319	5.8743	0.33455	16.0568	984.935	3.50689	11.2305	1.52092	6.37308	17.9117	0.56736	22.4551	14.4395
TCGA-CV-7252	0.413699	1	2.71765	46.0712	9.52704	34.381	20.9561	7.57208	11.7938	191.98	9.8229	8.97606	0.734291	145.093	7.63202	2.58355	37.2515	1.82246	31.2076	65.1962	4.7929	5.16788	0.00522258	6.0018	82.7487	8.75018	4.42234	5.96266	5.43251	16.8668	15.6467	3.62914	0.378395	8.6164	25.7511	5.15387	5.7141	2.58598	0.5672	21.067	822.45	7.28831	4.54628	5.40651	6.92821	11.4051	5.45423	30.8288	15.8576
TCGA-BA-4076	1.13699	1	5.12432	90.4157	9.03398	19.5352	36.4859	10.2798	6.8667	139.745	6.30628	10.0336	1.14452	300.883	9.14017	0.604327	6.42019	3.07516	21.3685	38.3692	8.46134	34.824	0.0202155	3.76052	38.1842	11.1442	5.16831	10.7244	7.96275	10.632	4.98835	1.2768	0.330612	7.17837	11.5958	8.85607	5.50412	8.28379	2.07873	12.927	883.644	18.132	10.279	3.09303	7.68277	9.84125	0.717227	121.88	26.4293
TCGA-CV-7430	1.35616	1	4.10879	41.7391	9.40696	16.3048	25.3524	9.10647	10.5767	47.1223	7.22419	12.469	3.65591	131.637	8.21484	0.589926	1.13868	1.72625	38.4735	9.6633	3.55262	42.2091	0.0262418	5.11852	15.6814	27.9947	2.05827	6.55269	6.78196	11.2794	7.24146	1.42957	0.371779	10.6222	15.4474	4.68422	3.95303	4.36869	1.5008	16.542	295.115	7.05575	12.9659	8.33722	5.18187	17.6526	2.07692	12.8004	15.5772
TCGA-CV-6936	0.454795	1	4.82803	62.9811	15.1573	23.2985	23.2188	18.9971	16.0642	102.392	9.33979	23.3421	0.476859	274.079	9.48456	0.739276	9.71167	0.626769	74.4732	23.6761	6.34152	8.4462	0.0860465	2.80365	54.845	18.9012	9.95545	4.85485	7.66052	16.2019	25.1109	1.728	0.836978	5.41187	21.1326	6.72929	4.22803	2.88731	1.62794	13.9773	684.462	5.91542	7.5213	4.28502	15.6369	5.83029	1.08415	30.189	12.6773
TCGA-CV-A464	4.71781	0	1.95824	41.7176	7.72189	18.6253	23.2277	9.94426	2.88829	82.9065	9.01474	10.5826	1.51599	84.8057	7.68501	1.33442	11.0912	1.94915	36.7981	54.0279	6.24826	7.17326	0.0119609	6.91064	83.6214	5.25238	8.86218	3.77144	4.98054	9.618	14.5472	2.77388	2.94103	15.4062	30.802	5.08926	9.83927	8.64629	2.71206	18.6344	574.436	6.41145	10.4389	1.53156	6.59199	11.7104	5.88122	14.3117	18.2236
TCGA-UF-A71E	4.12055	1	1.50645	101.781	5.64898	17.1663	15.1013	6.69958	9.7212	129.315	7.77929	13.1808	0.694736	144.205	7.83208	0.43777	24.333	3.45975	37.9097	16.5737	8.99007	5.97418	0.0182139	5.16558	26.7521	16.1135	9.06599	4.40056	1.6008	8.46752	11.9675	1.44372	1.17419	12.9454	18.433	4.55092	11.2003	6.65057	1.63792	7.58758	443.68	12.3881	5.9396	6.11899	6.98693	0.355785	9.47225	23.1476	4.40553
TCGA-T3-A92N	0.260274	1	3.57726	52.3771	11.2078	11.2421	25.2045	12.8886	28.181	115.953	13.7563	10.2259	0.591878	140.08	6.63539	0.605984	16.0033	3.75908	29.6226	21.713	11.4535	0.632054	0.0520913	4.4514	51.7742	25.5657	7.18598	4.36939	9.83446	9.89449	17.7003	4.08002	0.849091	9.47296	28.8255	5.57314	5.52585	3.52252	2.80291	11.5032	1497.26	10.6355	9.93421	6.28976	4.99018	8.32994	0.433266	38.0874	15.8139
TCGA-CQ-6229	3.23014	0	2.12589	16.5505	10.2984	12.9789	13.2828	10.0822	2.88824	30.3955	7.15471	11.3153	0.51655	126.628	6.05065	1.3955	11.2749	6.23569	56.0024	28.8438	8.20184	6.29145	0.0170619	3.90231	30.0078	9.57189	4.27176	4.79267	2.63679	13.7914	6.5519	1.22577	1.1997	4.89399	16.866	3.90405	4.44422	5.75837	3.54833	11.3848	484.57	9.02856	10.5914	1.82354	7.02967	4.63405	2.23122	126.374	13.4201
TCGA-CN-6011	2.55616	0	2.3428	57.4439	9.21804	55.9004	35.0687	9.98253	19.6327	184.417	4.67898	13.7244	0.561809	180.72	6.40813	0.807797	13.6905	9.19959	81.0033	116.745	7.69947	7.25464	0.0155298	4.20763	192.796	24.9226	5.56356	2.87148	3.62031	13.922	16.9799	3.22965	2.18394	5.0463	16.2892	7.14299	5.20734	2.16423	3.83527	22.7462	1143.21	18.0035	6.21529	7.76576	11.2812	11.422	2.34521	47.4417	28.6168
TCGA-CV-6953	4.49589	1	1.04389	47.0339	8.54421	22.7364	18.2767	4.94033	6.78321	149.167	5.5899	9.43706	0.439795	129.826	2.10444	0.470503	2.32494	4.43916	30.868	12.446	6.63506	13.1324	0	3.22595	23.9295	9.58079	3.62661	2.23059	1.9051	10.2583	11.2703	1.40487	0.429693	3.16476	15.0084	4.41084	5.06249	1.44575	3.82968	5.66858	608.812	12.4368	4.23474	1.97794	7.35867	8.87921	0.407567	76.965	13.9738
TCGA-UF-A71D	4.00274	0	3.49885	48.7312	7.84883	18.053	23.1626	8.2404	10.6604	35.7791	6.96302	17.3147	1.11865	79.1655	8.20675	0.419237	4.00018	0.982233	62.157	8.84185	5.59118	37.6419	0.0224744	3.07623	20.1436	17.8546	5.87391	11.1063	3.69456	20.407	9.92178	1.46354	0.282077	8.05577	15.414	5.07922	6.06266	4.34808	10.049	23.4112	252.933	16.5077	5.45129	0.794871	9.59798	10.7626	0.255568	18.9445	15.6562
TCGA-CV-A45U	2.95616	1	4.95957	38.9072	20.7179	12.6995	23.5021	15.8498	15.3766	81.5063	12.7835	9.71519	0.831045	120.926	8.4095	9.22688	3.22518	4.44775	56.8351	48.8087	21.5717	13.0777	0.072714	3.85182	52.2997	9.88927	5.70512	4.65558	11.1218	13.1631	15.5135	2.85498	0.297927	6.90899	19.1992	5.95825	8.09151	6.13972	2.24923	11.1968	574.867	15.2948	13.0349	15.0277	6.56409	11.4185	2.77827	21.0072	8.89791
TCGA-CV-A45X	0.542466	1	4.35361	74.2415	9.10384	9.54064	14.2241	8.84275	5.65993	214.768	6.14243	23.6198	0.934527	91.0971	6.306	0.259371	5.57037	1.34726	26.4167	21.9508	5.06988	11.9306	0.027284	5.64021	57.7777	10.9586	5.49815	2.84158	3.79981	12.3441	8.84998	1.4873	0.171221	6.47791	20.9247	4.7919	8.38098	2.19852	3.35723	10.8877	442.979	7.60299	6.69753	2.71179	8.94266	4.79036	0.316464	46.9281	12.5902
TCGA-CN-6021	0.756164	1	1.75744	42.9953	12.4626	11.1272	16.9086	9.54391	2.94545	16.0875	4.12196	11.5005	3.22744	98.4147	8.26102	1.14049	1.93515	4.52046	48.1925	17.9702	5.66072	7.00526	0	5.80918	21.6936	18.4987	5.72743	5.01223	1.7457	18.3335	13.5713	1.8116	0.646242	9.78016	18.935	8.49462	6.09945	2.73829	3.19599	11.4839	225.99	7.59477	5.96516	1.98079	7.26903	0.444106	1.67384	21.0802	1.93657
TCGA-CN-4723	4.65479	0	4.26347	51.3392	7.90338	35.9945	31.4119	7.63869	11.5982	376.782	11.7384	8.77301	2.42816	178.856	11.8632	6.39552	7.81357	1.71939	35.5416	73.0066	16.0137	9.62158	0.176567	5.40339	81.5101	18.439	6.61304	4.22608	10.268	18.1507	16.6814	3.16011	1.79302	9.03282	20.8204	10.3446	8.08326	7.00286	2.55585	19.7047	1120.12	8.30477	9.69845	19.478	7.55214	2.82464	2.19828	38.7705	24.5162
TCGA-CR-6487	0.641096	0	5.81596	50.0987	8.87344	13.0196	34.6166	8.79977	5.77738	169.699	9.47101	11.3585	0.66003	79.6511	13.0936	1.46086	3.38767	4.4266	41.8692	38.1287	14.7857	4.13895	0.0572831	4.48932	23.9676	18.2246	4.60466	7.03023	5.50898	28.2536	23.1012	2.62542	2.72433	14.802	11.3711	13.3084	6.33812	5.68819	7.4246	2.84476	521.035	10.4253	10.2453	2.71027	9.75554	0.760537	0.89537	16.5848	12.7705
TCGA-RS-A6TO	1.06027	1	2.01555	39.2426	8.23484	9.83924	19.0488	8.24978	19.5219	67.9923	11.9993	7.53679	1.29117	150.541	2.8627	2.54527	35.9329	1.69894	59.3807	69.288	6.74053	14.6001	0.0444562	5.46245	33.5868	14.589	5.29917	6.62969	4.4242	10.301	13.5868	1.5166	0.735508	11.6757	27.2689	6.80611	10.2439	5.28165	2.47573	7.15114	590.209	6.75972	8.47472	7.79504	5.65142	4.05025	0.857384	9.47642	17.2918
TCGA-CN-5360	5.94247	0	0.921053	53.5366	9.16496	18.8063	22.6861	4.40903	11.6055	67.4136	6.37638	9.70175	3.30473	79.4311	8.65259	1.86108	4.7539	4.76646	65.88	21.682	13.5688	28.3596	0.127783	3.57453	45.2466	17.2663	5.60783	4.74665	1.18641	21.7708	21.5015	2.39705	2.4859	8.91439	35.8057	6.71159	6.20467	2.85023	8.2197	8.88662	235.667	9.46039	6.4629	2.78751	9.78497	2.85195	4.33599	37.4967	10.078
TCGA-CV-6956	0.594521	1	8.10451	37.0299	8.56503	19.3854	15.0672	6.30352	22.3238	104.39	8.91848	9.99533	0.643001	91.0628	7.49862	0.48257	19.1606	1.28401	59.8397	47.8496	7.02964	13.4204	0.0184276	5.83137	75.7221	14.3642	4.76123	5.76505	5.71792	11.8061	4.13822	3.39358	0.606249	10.1548	24.2233	3.63134	8.75894	4.83006	2.94524	17.5518	621.479	9.81664	12.1179	4.21811	5.07649	0.320589	0.463803	32.2572	11.9081
TCGA-CN-A641	1.00548	0	3.75842	48.0301	18.8703	5.64818	14.3396	10.2666	5.64423	52.8047	19.9753	14.8086	0.642628	76.7874	3.62948	0.328818	1.98261	1.78744	12.7846	10.3609	7.94097	2.41036	0.0213166	4.88668	11.5921	16.3645	4.95517	9.2874	6.25451	16.4001	12.4603	1.56726	3.98583	13.2553	15.9392	4.81756	7.07353	1.77162	3.30949	13.1248	443.093	11.7412	12.615	2.60571	4.67856	6.47523	0.596308	14.7357	8.63274
TCGA-CN-4726	0.389041	1	2.01699	43.756	11.4852	39.3625	10.8076	3.97499	17.6525	191.892	4.60497	5.31437	1.01912	209.337	3.38706	1.36334	11.3595	0.851462	79.0428	25.8073	4.4138	12.347	0	3.64513	17.5035	6.31454	3.44372	4.49106	1.61129	8.78066	6.37905	2.91525	0.349705	3.10068	13.8276	4.60694	2.75949	8.4613	2.19549	16.8804	643.581	20.4008	14.0091	4.25999	8.02455	8.98872	0.669166	25.265	9.87752
TCGA-CR-7364	3.93151	0	5.18168	3.8098	10.6555	32.3939	24.6533	8.86654	7.13703	85.9123	6.28663	13.1074	6.56035	110.977	7.33519	3.0627	0.96659	2.34584	20.3188	25.2154	4.78447	2.25403	0.0185466	4.52467	19.2332	6.69451	8.63763	8.17992	3.1756	21.2019	14.8419	2.75837	1.85165	3.64494	19.9094	7.66195	2.67549	5.97308	22.5426	16.1323	546.306	11.2684	8.09745	1.33425	8.98775	14.8904	0.3037	356.322	31.139
TCGA-CN-6020	0.561644	1	3.64376	30.6494	12.6409	28.2402	25.2842	5.31849	11.434	64	7.11845	11.2298	1.52059	83.3595	3.40586	1.98583	10.8956	2.40912	39.7832	25.3678	5.90512	141.294	0	4.87259	80.1563	14.0926	4.59485	4.60113	4.50005	20.9538	16.1579	1.69489	0.711145	6.53887	21.5554	10.2029	4.85819	6.05223	4.58575	12.1601	615.562	4.36217	8.07798	4.29752	9.31582	11.1958	1.4381	35.968	15.1001
TCGA-CV-5431	1.43014	1	4.05415	49.9951	16.8622	47.6731	26.2064	5.20907	14.3536	65.2784	7.74686	10.048	0.94535	134.061	7.2751	1.09541	3.82229	3.04462	95.7758	51.5488	11.3014	24.3413	0.050772	2.6134	63.9148	16.4361	4.01577	5.27468	3.3817	20.7492	19.3387	1.56324	0.926895	5.81923	24.4225	7.20098	4.60325	4.24645	6.94292	9.99196	624.12	6.49066	6.00764	4.68491	10.4461	0.866686	1.87392	67.4852	18.3928
TCGA-CV-6943	1.64932	1	1.05291	42.2867	3.88984	14.1019	21.9696	4.65967	11.5393	37.7885	5.47072	6.41998	1.76006	102.534	5.2539	2.35286	11.7348	8.78392	61.2194	35.4829	5.15721	12.261	0.0110171	3.47342	56.0892	11.9084	4.12032	2.57088	2.52698	9.95647	12.2074	1.75888	1.61113	4.55181	19.63	5.30589	3.84757	6.11277	3.18436	10.4952	452.053	5.97743	6.64438	1.28557	7.08648	5.00521	4.28629	16.5214	11.0455
TCGA-CN-4733	4.34521	0	2.2106	43.4052	8.58761	19.2471	18.9961	4.49886	15.3638	18.9307	6.22272	6.42438	2.32026	95.8294	7.04213	3.61225	26.0941	1.59451	108.657	43.4061	6.14557	22.3148	0.0410443	6.39308	47.9014	22.1689	3.6649	3.86995	4.58066	17.1178	16.6668	1.93132	2.2089	7.95181	28.5979	8.3058	5.80984	8.06326	7.8641	17.5685	682.149	4.92359	9.13819	1.21147	9.36381	5.35855	2.66972	19.3596	18.4107
TCGA-CN-6996	1.45205	1	4.05122	33.8227	6.93571	13.7056	19.6073	6.07442	9.61718	50.217	8.04984	8.67119	1.35968	137.473	10.2273	2.00469	22.7859	3.62659	106.997	38.9066	9.39589	24.4638	0.0183373	5.19733	103.923	25.8781	4.39698	3.24804	7.61354	16.1694	11.1765	1.30776	2.25444	6.54213	23.3387	9.20602	4.36686	4.55416	4.0784	16.3977	621.969	5.95997	11.0824	1.94565	6.64246	7.31851	2.06437	29.5501	13.7459
TCGA-CV-5971	1.92055	0	1.06773	19.8951	3.94583	85.7925	10.3111	3.92864	7.34617	26.1318	5.70003	5.69256	1.22229	61.0249	4.40615	2.48566	10.0653	13.0621	45.0529	24.0728	6.48464	2.30216	0.0132825	3.50216	19.3058	8.52261	4.59986	3.69029	3.37404	9.42506	11.1908	1.57925	0.67189	5.19114	18.556	5.58996	6.85278	3.21951	4.24838	4.27118	221.668	10.2199	5.91052	2.76607	11.7921	5.77292	4.30168	8.66502	45.749
TCGA-CV-7236	0.394521	1	3.3896	27.2965	10.9973	20.6638	18.9953	6.20685	34.5178	38.679	11.2423	9.09201	3.96628	101.144	6.7529	5.33256	31.7489	1.485	41.691	41.2861	4.04721	4.12023	0.00942619	4.49092	73.7322	22.08	8.95655	2.63642	4.52368	16.1562	9.41727	2.14644	1.23686	6.49696	31.1898	6.60024	5.17854	4.45826	3.56946	15.8626	613.357	5.14985	10.6613	2.40182	7.03273	5.10309	1.64643	416.153	15.0362
TCGA-UF-A7JV	0.246575	1	2.47166	78.4994	8.08078	30.4218	14.3527	7.56496	57.2828	268.089	10.348	6.18562	1.29783	110.275	7.54768	3.79433	41.9211	5.29408	68.122	47.3164	9.55753	7.30059	0.0232464	4.03095	47.2063	10.7058	9.66052	3.77408	4.19708	8.26999	14.3234	1.64859	0.440302	8.45708	24.1487	5.83299	7.8973	3.10568	1.94186	20.133	735.829	5.16315	12.1667	5.96047	5.27143	12.8372	0.609054	18.0596	34.4452
TCGA-P3-A6T8	1.09589	0	1.43656	38.1267	10.7918	12.0077	9.2481	4.10076	15.5187	66.3636	8.09017	6.63101	1.69917	83.6083	7.02622	1.9468	88.2922	0.792427	67.0887	64.8995	13.0464	5.31719	0.0328506	5.36804	187.425	18.7378	4.21535	2.16982	4.48925	5.76061	11.6541	2.17512	1.34937	9.53006	27.7929	4.41535	10.1233	4.82867	2.24693	11.4598	554.833	2.61709	6.15609	4.40996	6.3997	11.9716	3.16779	82.4217	10.9784
TCGA-CV-7238	7.47123	0	1.25343	30.9196	7.92709	23.2553	24.4574	7.14494	12.6969	66.0114	12.7148	7.58245	1.80542	88.0142	6.49898	1.37789	4.99608	1.61213	67.0558	39.9259	13.0945	12.0434	0.0151221	3.84175	45.3779	10.8196	6.97707	2.351	4.0034	9.68299	10.3995	2.59636	2.48462	6.25624	27.2437	6.20044	8.568	6.48311	4.69407	11.987	624.021	6.05132	5.88682	1.68649	5.56836	6.73628	1.95347	19.4681	15.8045
TCGA-F7-A623	1.68767	0	4.80538	41.608	10.4783	24.5203	22.4155	12.0376	6.95972	272.811	6.87036	17.6895	0.64497	181.486	5.942	0.390487	2.22058	1.43847	12.5599	48.8866	15.9176	23.9492	0.0180419	4.15183	121.265	6.63063	8.24586	6.97874	10.0894	12.3573	7.40249	1.86466	7.26336	15.8853	11.0549	8.9481	8.3174	5.41722	1.42789	22.8288	895.04	21.2213	7.96892	1.77923	8.1737	14.4934	1.51547	17.1915	13.7152
TCGA-D6-8569	2.10959	0	5.53084	50.5412	14.6644	30.4091	24.1774	8.64907	24.8196	58.0612	13.9885	10.1044	1.69593	158.997	10.5955	0.853642	24.6006	1.21826	30.2981	28.0743	11.8881	32.3101	0.0616939	4.67035	90.9303	12.9943	8.59676	4.28621	16.883	16.2782	11.002	1.64403	0.774322	10.8059	33.9071	9.73135	7.01487	3.56118	2.0722	12.4282	723.991	5.12074	15.1463	1.98858	7.08268	13.384	2.04452	38.8282	18.8791
TCGA-MT-A67F	1.05205	0	1.20564	19.6275	4.12643	48.9961	15.9907	4.62329	18.2214	312.931	7.18728	6.99226	0.612339	109.444	5.46063	1.06202	17.66	5.11882	155.282	19.0266	9.43081	44.7225	0	2.15683	19.1439	6.65842	4.02449	3.42327	3.34958	7.81147	16.4768	1.01366	0.598949	4.64196	10.24	7.48531	3.4803	2.23887	3.8989	12.8682	424.351	9.20317	9.62481	1.53866	5.1137	14.8405	1.32288	8.06438	9.85197
TCGA-CV-A45T	13.3041	1	2.83317	29.9572	7.13997	9.03579	16.5264	7.88855	6.68338	18.0368	10.7889	11.3973	0.872973	107.446	5.91153	2.29679	14.8666	3.03267	46.8055	25.9476	9.17657	13.5203	0.00609767	5.47122	28.5019	10.7082	4.90517	4.11042	3.95075	7.62762	10.4536	1.74459	0.761841	9.71289	22.2478	3.85133	9.59345	5.74423	4.139	6.7179	541.506	7.18201	8.01958	1.49546	4.82918	9.68419	0.992941	13.059	20.6185
TCGA-P3-A6SW	3.06849	0	3.79949	91.5012	6.83197	10.2694	34.2208	11.2374	20.625	181.223	16.9443	15.4144	0.386722	83.8524	5.96477	0.337108	1.7015	1.88187	97.5179	17.2039	15.1543	5.62173	0.0279127	4.57686	41.3585	18.2431	11.8785	5.87873	3.2909	25.9333	21.7471	1.27042	0.817444	16.4725	17.3481	5.97528	9.65093	4.97645	2.64985	3.56043	495.54	14.4605	10.3729	2.71423	7.91535	0.451525	1.80288	14.8113	15.6766
TCGA-CV-6961	0.208219	1	4.41357	94.1208	11.2285	50.5494	23.3068	8.77161	54.8779	376.676	7.57099	10.3582	1.67179	254.638	7.82458	5.1422	14.7003	6.20728	203.959	75.9588	4.87151	28.8432	0.00725611	2.91575	165.312	17.4036	6.74098	3.73037	4.87048	17.8146	20.5745	1.73917	0.351867	7.38337	15.5194	12.328	5.80904	4.48264	3.38695	16.2644	1217.61	4.85628	10.0875	54.4492	8.83839	7.98442	1.07597	20.6272	34.8276
TCGA-CV-7429	0.293151	1	3.96577	54.6838	12.0752	21.5913	22.8684	11.0865	19.1662	57.8006	8.51824	10.2319	5.16313	127.088	12.1972	2.49032	26.8279	0.415553	72.5905	88.6639	6.53019	4.12594	0.0356263	7.77935	72.4385	20.1844	5.94232	4.68605	5.63363	19.9139	12.1419	3.2095	0.386172	14.4237	39.3138	9.1984	7.24551	4.3388	7.88544	13.6191	617.537	6.20076	22.1292	4.05731	8.83249	6.51487	7.45891	34.0959	11.7564
TCGA-CV-A6K0	1.66027	0	2.80312	26.7909	8.49427	20.5299	16.9082	7.289	5.12603	14.7324	8.70753	8.05117	5.68855	76.6188	8.09058	4.50871	19.8021	5.01861	54.4096	29.6876	17.7831	2.81555	0.0480501	4.03843	38.1519	12.5272	8.32752	5.32553	2.63758	12.21	10.4241	1.60922	1.32755	5.54176	24.9725	5.6412	5.11308	5.39759	4.02491	9.4437	422.427	7.76911	10.181	1.64804	8.08949	12.1022	2.03573	63.9779	17.6935
TCGA-CV-A6JN	2.48219	0	1.46082	88.7961	6.56545	7.55883	19.4506	10.6745	19.0321	62.4602	9.83224	6.60374	0.721728	67.1895	4.32741	0.540276	4.88258	1.39159	33.4318	43.8607	2.58881	3.78178	0.00622346	5.9695	30.1314	5.025	5.24959	2.66968	1.29072	2.83446	8.22268	0.601373	0.223681	9.87158	16.3756	2.01695	14.0372	6.4054	0.143809	9.65728	974.218	2.12853	5.23864	0.652297	2.21509	8.89815	1.23989	5.9266	14.891
TCGA-CV-7245	2.18356	0	2.55153	54.459	8.6088	19.3371	23.2976	9.32998	13.5633	65.2599	16.7967	10.8758	0.945401	101.473	5.79763	0.895725	6.51788	3.76323	33.8139	32.9385	3.43954	21.052	0	3.54507	62.4295	17.0097	4.62659	5.72135	3.92084	17.5511	8.84223	3.1247	1.03173	6.65101	17.6132	4.1516	4.66343	3.86529	1.57129	25.6014	761.468	6.47312	13.058	5.99296	5.88801	5.84004	1.01005	27.749	12.4898
TCGA-CN-4739	3.81918	1	4.77669	24.1589	12.4131	18.1929	22.8532	10.9224	7.32719	34.8405	7.85806	13.5059	1.82847	99.2825	5.88973	0.404786	2.70135	5.7897	54.8459	21.3926	13.4485	1.91036	0.0841341	3.24252	56.6996	23.8008	4.36803	5.45168	2.64561	24.8412	12.4933	1.75905	0.477162	8.5133	19.0922	6.30093	6.27617	6.45388	8.63423	9.93873	464.325	12.8751	7.41149	1.65328	8.87719	4.66298	0.45923	24.6741	13.8517
TCGA-CR-6488	1.03836	0	1.91	14.4805	6.89517	30.972	16.1318	6.55607	11.3804	30.7383	6.30744	7.3403	4.08678	75.5597	6.36251	4.56709	7.1821	2.11801	188.031	37.9519	13.3702	20.5563	0.04919	3.9117	71.8884	9.74987	5.39593	2.8619	2.64212	7.55074	17.966	2.07038	1.97716	5.08579	25.4107	5.93931	5.12097	5.03426	2.05374	12.1958	308.046	4.77565	10.9672	3.52105	8.27303	6.83591	3.71417	16.9151	15.8716
TCGA-CV-7411	7.44384	1	0.54988	43.5403	7.53931	15.1157	22.8265	3.02665	16.0949	129.761	3.5599	5.36924	0.45524	145.514	2.26471	0.867968	2.30807	5.3404	49.8604	21.8648	3.06018	16.7077	0.00896132	2.2104	28.4656	7.35374	3.50954	1.89908	0.832023	8.35327	9.25115	0.692745	0.334865	2.25148	12.663	3.63774	2.98404	1.91512	3.14235	7.63461	626.491	14.7707	6.96362	4.09249	5.19773	9.07102	0.778542	17.4396	13.3865
TCGA-BA-5152	3.52877	0	2.66466	38.7095	4.61364	26.4048	19.7863	6.62654	8.40788	41.9024	7.6828	9.14077	3.67778	99.266	3.59615	0.761475	7.45608	3.55168	81.0902	32.1956	3.17057	11.7537	0.0180809	5.73097	88.4441	17.6213	6.14183	3.48236	7.65388	7.61634	13.1584	1.90364	1.25639	14.7547	11.5205	7.71959	8.46685	5.42518	1.49365	11.3886	1286.69	5.42649	7.2119	1.01197	5.73133	20.9892	0.802687	12.5406	17.1652
TCGA-IQ-7631	3.21096	0	0.444119	58.5854	5.40268	4.33444	14.0609	2.95752	24.4081	107.502	4.402	4.03625	1.42415	37.3893	4.05004	1.35076	6.59191	2.14438	60.1938	39.4562	7.16324	1.97025	0.0333714	4.52079	68.6345	8.09093	3.82207	2.52525	1.21611	3.43493	24.4747	1.36932	0.266538	9.40911	28.2528	1.55557	7.39535	9.30987	1.90533	7.23387	264.012	6.37143	4.93159	3.21057	4.48858	12.5382	2.76769	15.1851	22.1027
TCGA-QK-AA3K	0.693151	0	2.68512	51.9099	9.10341	19.0545	18.2137	7.80032	28.9416	29.2251	15.6908	8.00937	2.01697	106.284	9.38521	2.17793	9.8967	1.52422	48.8803	99.8963	9.21145	5.52657	0.0947148	5.83891	35.9541	20.386	7.44952	4.63484	3.25869	7.10181	17.7014	2.39153	0.475507	6.25055	39.1398	6.56604	9.81342	3.66486	10.5054	10.5955	673.275	5.44454	7.04523	2.38647	8.08522	12.974	9.18506	13.822	20.7649
TCGA-CR-7376	2.66301	0	2.35205	14.2641	6.1605	25.3163	20.8412	4.01739	10.1207	16.7589	5.79471	6.89672	2.21537	74.6104	6.54312	3.95422	12.2861	1.47124	130.331	41.2505	5.06886	23.2187	0.0252721	3.87414	43.309	13.2787	5.78889	2.9334	4.54046	14.0937	16.1844	2.46858	5.07264	5.10073	22.4036	9.00829	4.1295	4.52206	4.24355	10.5896	362.477	5.80281	9.09643	1.64628	10.6516	7.91972	2.80867	18.2417	14.275
TCGA-MT-A51W	1.19726	0	2.73088	52.8107	14.865	9.70266	17.8675	6.55757	11.3329	23.5843	7.46863	7.42881	1.01521	146.436	6.18608	0.315902	20.1281	6.96339	55.1793	23.7111	7.43795	4.06202	0.00587074	4.55286	51.1443	15.2208	5.14326	2.60876	6.93259	8.95174	10.0134	1.51688	0.844014	6.76528	12.4172	5.15929	4.4343	2.49099	3.22528	15.9437	680.522	5.15278	7.99538	1.49134	4.87751	11.2643	2.45673	18.3744	13.3204
TCGA-D6-A6ES	1.06575	0	0.705452	39.3708	3.11564	4.16235	20.8639	7.34535	12.9754	32.0853	4.91136	6.11842	0.136613	41.8284	4.81492	0.246722	0.758797	0.471033	8.94703	37.4381	1.41175	7.09829	0.207069	1.60815	19.0357	2.87211	4.91339	1.83512	0.0535034	2.89478	15.3628	0.885495	0.434562	4.36018	9.47082	2.31832	14.6296	6.20668	0.200793	5.59213	1130.75	1.64559	4.65053	8.74019	3.15288	5.78622	0.874597	3.20806	21.7169
TCGA-MT-A67A	2.50411	0	1.23735	74.7575	4.97236	2.82249	14.7696	7.14023	1.07491	18.0767	8.00909	4.04266	0.935872	34.5605	4.86875	0.254048	0.582337	0.851258	22.4025	14.1184	6.96666	4.72276	0.048506	3.41355	17.8381	13.3375	6.50858	3.08674	2.86202	4.70854	10.8492	1.20235	0.979615	10.7407	4.06585	1.14446	7.10242	1.19334	0.347465	5.65965	426.917	4.03087	5.71711	0.41574	2.84523	11.5343	0.529522	6.62157	5.7937
TCGA-D6-6827	1.55616	0	3.05255	46.2406	13.7672	13.9882	27.8703	12.8608	2.92226	118.241	7.51687	17.8686	1.68478	83.8069	11.5564	1.39019	1.51392	4.38036	32.4595	28.0509	16.2372	3.88518	0.0994941	3.5709	15.3259	17.8619	8.33578	5.65714	6.6103	21.0571	14.5177	2.43906	0.990488	8.79905	23.3348	12.5583	5.26397	2.36254	3.14109	4.40236	365.793	22.1118	10.386	1.62588	13.119	19.2109	0.746721	36.5355	21.6857
TCGA-IQ-A61H	3.11781	0	6.65095	77.472	13.9284	17.4319	15.5143	10.789	10.5626	38.4414	7.28325	13.4853	0.501245	187.547	10.6409	3.05039	2.89895	3.54514	39.956	21.8255	8.87636	9.88981	0.0210826	2.78433	29.5373	14.3681	6.37414	4.1708	0.146878	17.0764	16.1639	1.32271	0.493133	11.5001	14.9961	4.96494	6.96325	3.62743	5.18426	14.5089	583.157	11.7281	6.88139	4.2997	9.07012	0.768946	7.23695	17.857	15.1677
TCGA-IQ-A6SH	1.29041	0	1.9865	116.702	5.59174	16.0617	24.017	11.4575	6.18368	52.0784	9.46902	10.7945	0.522992	129.514	6.08969	0.579869	22.1077	3.26607	33.9762	29.9026	4.53629	38.6144	0.0259671	7.6705	50.3036	6.59036	3.6048	4.48191	3.30852	5.7362	16.0944	1.57643	0.751823	12.7546	19.9391	3.57534	10.0779	8.10176	3.59271	23.6876	567.173	4.46734	6.48507	1.82004	4.35954	7.1924	1.65359	15.2865	20.9166
TCGA-CN-4729	1.07397	0	1.35979	26.3227	8.55224	32.4676	14.9796	5.95787	9.53377	77.8732	6.12599	6.40172	2.10595	159.065	4.98985	0.99538	17.2871	1.13308	45.2461	31.3921	7.50158	29.5345	0.0211006	3.83112	60.1718	12.1863	2.91205	4.92708	2.69272	17.7175	16.6864	2.71048	1.12555	4.42667	13.1897	7.46427	3.1949	2.17668	2.02347	13.7195	750.984	5.51039	7.80032	3.56799	6.79816	15.2222	3.40722	22.4894	11.8467
TCGA-BA-A4II	2.51507	0	5.09968	74.4575	10.6022	38.0756	21.4117	10.0886	6.11569	27.9579	5.31505	19.5651	0.605329	143.335	8.81462	1.08942	5.16418	2.86733	16.2664	32.1184	12.1727	17.7581	0.0302478	5.35142	37.8172	16.7533	3.98972	7.50036	5.28609	17.4172	7.97374	1.38517	1.53237	7.97449	20.6247	8.0749	4.46408	2.92481	1.63205	19.1935	766.57	20.8442	17.2822	6.9123	7.71977	8.28392	1.86565	132.013	15.2892
TCGA-CV-7180	0.89589	1	2.8363	36.0126	6.07645	15.4211	14.1195	6.1598	4.67738	34.0931	10.1535	6.44161	2.85836	77.2489	4.07114	0.30852	8.56115	1.66756	46.8522	27.4042	4.82978	22.8505	0.00661564	4.98622	53.9096	13.4895	3.27498	4.863	3.98854	8.65045	4.90263	2.08179	0.943557	8.39934	10.5978	2.96396	8.38964	10.229	2.64085	8.85603	549.988	7.1242	12.3083	0.358656	4.6965	9.22263	0.337029	45.8092	13.639
TCGA-BA-A6DI	0.920548	1	1.66236	40.5818	10.7562	15.683	20.9259	7.27612	7.13763	43.7818	9.33112	10.4977	10.6998	126.737	5.12424	3.19679	12.3246	4.63924	54.3176	27.9594	11.9639	9.35142	0.0633051	4.23911	46.7509	10.416	5.37636	3.52809	3.24121	12.0858	10.8532	1.09454	0.425053	7.55284	13.0148	4.8346	4.77988	5.35698	15.5228	24.8809	614.656	6.45462	10.7266	2.65256	6.95417	3.57598	2.56053	35.904	9.24449
TCGA-BA-A6DD	0.473973	1	3.23729	98.2106	7.10963	17.5689	24.6655	8.79166	8.16328	234.121	10.7915	11.3018	1.6782	116.587	7.27905	0.579708	17.076	2.48544	27.8783	43.8175	4.78295	4.85768	0.0320635	4.83778	50.1549	15.5182	10.171	3.40518	4.41262	6.74307	11.1411	1.34708	1.32802	8.80763	22.6589	4.24581	7.42545	7.56374	2.42648	10.2389	769.387	6.42121	9.2462	2.4998	3.93278	15.2518	0.991738	9.69013	13.3794
TCGA-BA-6872	1.05205	1	3.18583	70.416	9.21509	22.4258	28.1652	8.14723	25.2284	180.788	9.01736	14.3621	1.22093	126.02	7.16327	0.91619	11.6812	2.07567	74.1962	45.1703	4.16239	6.23539	0.0072763	4.84408	73.8602	11.6786	5.3912	4.31625	3.46854	6.34542	17.0994	2.28663	0.51059	8.00719	21.7958	3.71808	6.9227	7.1038	10.9457	23.8192	925.559	5.23209	7.20996	3.26473	6.00994	7.20214	1.70118	110.214	16.0649
TCGA-BA-5151	1.97808	0	2.27317	15.911	12.4261	27.4663	16.3924	6.22168	4.11844	43.2331	4.89764	11.2078	1.82172	89.2102	7.63028	0.982491	29.3656	3.94702	47.2465	26.9089	7.25848	24.775	0.013694	4.45951	40.5529	14.7561	5.33515	7.30778	4.08951	17.7156	9.10623	2.13734	1.75585	4.56445	16.1848	8.36335	2.90362	4.85626	3.36015	13.9291	433.829	11.6831	12.6619	2.15473	7.8979	13.4996	3.54733	25.3905	17.5828
TCGA-CR-5247	0.980822	0	2.51601	47.5872	13.1076	43.6343	18.1461	7.20472	21.7837	203.413	7.49303	3.55493	1.53102	140.307	5.53984	1.44359	29.764	1.87303	39.495	68.4481	3.08644	6.26311	0.0564134	4.12	53.1022	8.47461	5.8691	6.68714	2.72596	9.71889	6.98011	1.32462	0.200256	7.46473	20.7003	2.56734	7.60717	5.15332	2.1328	24.8681	574.43	16.5909	11.8308	6.99055	7.45696	6.80118	0.866744	19.9855	19.2991
TCGA-CV-7433	1.64658	1	1.72099	55.824	11.0938	27.3659	28.0846	7.75549	16.131	159.624	5.74033	8.93223	1.66875	152.861	6.66786	1.59983	22.2698	1.76223	42.8071	71.3876	3.62439	36.4706	0.0316612	5.69761	59.2655	12.7678	4.72856	2.0686	7.20998	11.3063	16.7809	2.26131	1.65145	9.39412	22.2508	5.10203	7.12133	5.52504	3.14855	12.6236	620.845	6.43321	6.72879	10.7005	6.31646	1.64417	3.74436	15.8015	11.7881
TCGA-BB-8596	5.92055	0	4.0282	19.984	10.606	32.2105	18.009	6.07804	10.727	25.7412	9.75001	12.0637	2.26636	71.5858	6.51503	4.0184	6.49113	3.85085	51.6428	47.298	12.0837	3.23927	0.0822984	3.39133	47.8147	12.9352	6.06048	4.09377	2.41104	13.6506	16.2709	1.66349	1.55983	4.22729	34.6914	5.09682	5.59128	5.2255	6.20698	14.2483	542.794	4.52796	10.5806	2.76671	10.1237	7.04577	3.42731	31.6179	15.4141
TCGA-CQ-5334	0.353425	1	3.84783	32.414	8.2796	12.8869	26.2291	6.30196	11.4628	35.165	6.26145	9.07724	1.81032	116.873	5.24241	2.32257	41.0048	0.309879	66.8132	41.2063	4.66007	2.62562	0.0195997	4.77238	55.5804	17.175	6.87265	5.16335	5.78225	23.705	10.5064	1.75393	1.78161	7.52872	29.6081	7.83719	7.36035	3.84532	2.08712	18.0154	668.626	4.70676	11.2922	1.3864	7.97216	18.5744	2.44274	29.3281	18.0177
TCGA-CN-5355	3.50137	0	2.39091	24.5817	10.5952	17.9409	13.4271	7.86608	5.79601	66.1548	9.66562	9.10482	1.76796	97.5546	6.82604	3.33261	13.7376	1.64442	93.1931	46.5851	7.06508	7.46393	0.025149	5.26346	41.0845	31.3713	4.78329	5.68334	3.1497	11.2007	9.3285	4.00868	0.697289	7.51483	15.9975	7.53044	4.84956	4.13129	11.0793	8.42506	515.207	6.86382	12.9094	9.2738	8.79974	8.45107	3.01081	44.1059	12.1478
TCGA-P3-A6T5	2.41644	1	1.29944	92.6932	5.94067	13.3097	25.2365	9.18083	30.2202	13.7587	11.1061	12.7169	0.422928	152.034	5.32973	0.499771	13.0683	11.1298	97.3278	52.5792	6.32542	39.9055	0.037222	5.16406	137.771	10.2021	6.02663	2.59083	3.40248	6.46189	8.7409	1.54147	0.803904	6.52845	16.3322	2.9321	6.18805	4.34684	2.18406	20.4236	1292.99	5.06155	9.14304	6.45739	3.99436	6.90891	2.06555	11.0297	10.4278
TCGA-TN-A7HL	1.69589	0	1.1879	72.3251	3.88582	10.6564	26.6024	10.1373	16.4458	87.775	13.1982	15.4189	0.364097	85.5707	8.19688	1.9164	0.712195	9.57	61.1283	14.184	5.06772	3.39737	0.0234563	3.79249	19.8612	9.03814	10.6663	4.40613	1.95627	4.00309	17.0341	1.29096	1.10066	23.3667	9.23063	5.89574	14.2948	8.22234	2.88285	12.5018	708.597	11.7638	6.72197	5.69818	3.29733	0.700705	0.68817	7.53408	18.2273
TCGA-CN-A6V7	1.6274	0	5.25352	99.6477	10.4461	18.485	35.5835	11.0756	27.6605	16.0346	17.9584	13.9183	0.518587	207.263	10.6491	0.957107	0.92761	3.76632	29.2163	36.7124	9.8418	1.57717	0.0555842	5.58301	55.0531	18.718	4.99472	6.19172	6.55201	6.15659	22.1037	1.6453	0.541968	20.1776	8.76015	5.48898	10.4535	3.87505	12.4355	5.91678	919.187	9.87323	10.9492	6.14162	7.07881	0.129552	8.65138	13.1348	34.388
TCGA-CR-7397	2.06575	0	2.689	43.6178	7.70692	28.9396	19.824	7.50562	16.4216	36.2148	4.51795	4.77668	6.04364	147.877	4.18139	2.35435	10.4048	2.35494	51.4103	35.0614	6.0988	2.45481	0.0381571	2.9314	46.8361	10.5325	4.98119	4.23702	4.46293	13.371	9.13836	1.57103	0.830838	3.12102	27.4189	5.92181	3.97708	4.18868	2.77374	13.9632	483.461	9.82273	8.14687	4.01577	8.85952	7.70097	3.8357	36.4426	18.0405
TCGA-BA-A6D8	2.32877	0	1.56435	216.787	7.06621	5.78279	24.084	14.0959	19.8493	18.7388	11.3053	13.7518	2.24474	58.6135	13.5194	1.14925	1.53805	0.776846	23.7006	54.6695	3.98541	24.8678	0.0325245	3.57063	37.0789	9.29442	7.36188	2.16497	0.895472	2.47456	26.1006	0.809622	0.148442	14.1504	26.8403	1.78374	19.9437	6.07088	0.756257	4.75112	734.528	5.04262	6.63989	10.2689	2.55452	7.13249	3.01059	3.19973	8.52319
TCGA-CR-7385	2.73151	0	6.38531	36.9433	7.7559	19.6782	30.9628	8.43493	6.75801	19.5682	8.02405	11.2838	0.96835	115.368	12.0747	1.66721	1.35223	5.63848	50.086	22.6617	9.69755	3.43799	0.0100379	4.66225	37.7853	20.1357	7.20848	5.17866	8.97279	18.9031	30.9642	2.44598	1.09378	8.47377	9.27492	11.376	7.23243	7.7055	6.94691	8.9842	649.559	13.1948	7.95348	0.362791	9.32908	0.643376	0.328739	14.9255	18.0076
TCGA-CR-7394	3.68767	0	1.22385	17.4972	8.80205	27.9917	22.4543	4.78374	7.21258	54.3147	4.32173	6.61884	1.47826	107.867	3.4738	1.43872	10.7581	5.47879	43.4531	24.3371	3.8954	30.302	0.00806958	3.81619	38.78	12.5994	4.90144	3.75394	1.31683	14.1041	12.1329	1.64428	1.69416	4.37926	16.8858	7.55161	3.02416	3.76323	2.77371	9.70029	441.633	8.50148	7.92352	2.82487	8.09929	9.01439	2.14358	16.4764	11.6986
TCGA-P3-A5QA	5.97808	0	3.84912	46.9009	10.3736	27.5424	11.0051	13.4743	29.2188	32.9659	7.60275	8.3766	2.40326	114.607	7.6007	13.0846	42.1046	2.45953	70.2222	114.839	6.93395	2.3427	0.0827468	4.37516	84.0952	8.4633	6.68339	4.39973	4.40342	7.56921	10.747	2.31531	0.0912671	4.25957	26.5443	5.29033	4.51232	6.1115	3.56283	10.0619	613.401	5.58818	10.3129	23.4268	7.66896	9.92287	0.737707	17.9752	24.3205
TCGA-MT-A67D	0.153425	0	3.29227	41.5134	8.00482	17.2534	16.0757	9.265	13.3247	61.3317	12.1621	10.7729	1.77187	117.73	6.02342	0.909097	4.55628	0.935888	33.4768	29.2973	8.36551	8.01988	0.0180157	6.8167	25.4771	14.492	3.8627	3.95565	3.60605	10.9655	10.4951	2.93422	1.08261	14.7156	20.8396	3.66559	8.73036	2.04312	6.08836	14.6797	498.052	3.86033	15.3159	3.98429	5.15254	8.57788	0.830387	21.8739	8.29242
TCGA-UF-A71A	0.235616	1	2.36021	148.008	11.0742	18.103	27.0709	9.70988	22.5671	157.126	9.87185	7.72233	2.23563	188.374	7.46989	0.898182	1.70455	4.23761	43.3308	44.6772	7.56068	4.41746	0.0318255	4.92052	31.0756	10.8998	10.3658	8.4183	5.00653	8.5995	26.1222	1.44326	1.28761	12.7953	41.6918	3.44454	10.4907	3.55277	2.2522	14.0652	373.243	13.429	8.62981	11.6192	5.74618	3.07086	3.11295	16.1983	7.33498
TCGA-QK-A6VB	1.75616	0	5.04685	41.1041	10.4292	17.171	24.4074	16.3397	13.6276	84.2044	16.3239	21.78	3.41154	216.377	13.2235	1.21537	1.0752	1.33994	18.1872	31.6071	9.06759	2.53854	0.00945046	4.68537	29.2814	11.3901	5.46317	4.68304	3.86301	27.9946	19.2987	4.57591	0.129396	20.2455	16.3301	6.57339	10.3015	2.10427	4.25289	8.21375	560.407	9.7648	13.3121	2.08108	10.5958	3.83122	0.65769	10.1267	21.9069
TCGA-CV-5970	1.11233	1	2.34768	39.0574	7.4815	14.9816	16.4107	6.25607	12.8158	77.5464	7.31309	10.6703	0.701056	154.118	3.00895	0.785753	6.83742	2.72848	60.3871	60.8287	3.89186	14.6821	0.022125	4.56595	75.4158	17.6924	3.89108	5.23807	3.04576	12.6105	6.94423	1.48958	1.54624	4.62305	24.7176	3.9848	3.59387	4.73695	1.55613	11.1738	828.532	7.60511	10.0424	2.65026	7.21683	6.36625	4.14627	27.0243	11.1595
TCGA-CV-A465	0.589041	1	3.93433	29.6139	8.8132	9.31162	10.961	13.2623	4.56088	13.5037	10.5218	10.5615	0.593114	110.681	4.57927	0.53575	11.0233	1.06042	25.7772	23.4544	13.1043	30.0216	0	3.41878	33.9862	13.1895	3.48489	3.46857	4.22718	7.84234	4.04996	1.61069	1.38086	3.92954	20.6664	3.61031	4.18259	4.58853	2.43952	17.2052	525.016	7.03043	10.4814	0.714968	4.4567	3.93739	2.85781	13.7465	7.21087
TCGA-HD-A634	0.356164	1	6.96062	101.842	6.59343	5.52135	22.519	21.9439	2.375	15.6104	22.1304	10.7915	0.823662	132.845	12.1635	1.29162	0.585889	1.25227	13.7708	22.7406	16.9241	0.589792	0.19144	7.66369	10.3772	13.9213	14.592	10.6159	15.3003	6.15838	45.5664	2.63562	0.0966148	31.0788	10.1996	5.92911	18.9655	3.70891	4.2961	7.69023	389.941	13.2438	12.7663	4.9308	4.95897	18.2605	19.9543	0.38106	11.3465
TCGA-CV-A460	5.03562	1	4.45581	59.1827	8.61637	43.5768	35.4873	5.11205	13.8498	114.459	15.3096	11.6126	1.22262	126.755	11.2304	2.2649	2.62044	1.42762	51.8285	44.5213	10.0747	6.90336	0.042421	2.9903	81.1791	8.72989	6.74669	2.53346	5.43905	16.5494	18.5539	1.10201	0.726037	11.8067	23.7638	5.3793	8.71175	8.01445	6.46962	8.22998	656.077	8.81787	10.0798	1.99315	7.25411	4.51543	1.4343	28.7715	21.0902
TCGA-UF-A7JF	4.61918	0	1.51595	115.865	4.52923	15.67	44.9237	10.015	25.8483	466.407	8.78559	12.2532	4.61339	98.9502	3.38075	1.20415	0.346492	2.25043	18.4705	19.9354	2.90929	9.30421	0.070916	2.88901	41.1182	8.00853	5.59438	3.12558	2.47029	4.63475	11.5037	1.4268	0.377605	10.1888	19.5001	1.75989	12.2506	16.6799	4.14226	8.19716	692.674	6.79688	7.77233	1.95281	3.28663	13.7263	3.86365	6.98435	33.8731
TCGA-CR-6493	0.772603	1	4.89006	169.505	12.8947	58.8064	34.6719	7.24667	9.81854	333.015	9.86266	6.53046	0.667377	176.877	8.49694	1.20078	59.3324	4.5169	51.579	52.546	5.88816	10.0006	0	6.16256	89.3246	19.612	5.94864	6.32571	7.03102	15.4648	7.90982	2.83874	0.147806	8.66163	22.0245	6.58669	7.58709	7.81407	2.52639	17.7054	1048.32	8.81117	12.5822	6.01956	7.91551	7.57222	0.273401	75.288	18.0501
TCGA-BB-A5HY	0.879452	1	3.71456	60.7432	15.7093	7.13493	17.0073	16.3847	30.7848	388.504	11.8435	11.7145	1.32826	256.655	11.4949	1.0342	27.9578	1.13466	46.8344	66.6356	16.1006	60.1208	0.0368035	5.53828	45.2107	12.1525	7.75111	8.53266	9.5017	16.5851	24.7993	1.44315	2.89751	22.5105	18.4385	4.91901	7.8001	2.61699	6.11962	16.4786	609.74	8.17678	10.2163	25.6532	5.37019	12.0979	2.62825	231.142	18.8193
TCGA-IQ-7632	1.20822	0	1.47658	28.7101	10.307	13.0713	12.5257	8.06056	4.96702	137.69	5.51696	8.48401	1.42669	62.9406	5.86522	0.449274	6.36394	5.3993	64.3993	17.9844	2.63312	38.1601	0.00626201	5.61427	31.6717	10.2428	5.68999	4.47829	2.57227	13.8527	5.92107	1.76794	0.407263	7.84549	16.9011	4.74782	7.6433	3.35417	3.23765	9.01686	443.47	7.82714	8.32011	0.821231	6.64386	14.1853	3.97058	296.18	10.2601
TCGA-CR-7389	1.07397	0	1.53781	32.1096	4.69494	31.1041	15.8748	5.94706	6.68701	33.599	3.32251	7.09586	4.27601	94.8628	5.86362	3.43689	5.79103	5.77673	48.5347	81.392	4.76906	8.5039	0.129961	3.36566	90.8055	12.5307	7.9234	2.49519	2.65355	16.5269	26.1633	1.64675	1.64004	3.91822	18.5444	5.35743	3.31128	2.79662	7.1353	8.0905	582.298	7.8187	6.70615	1.99156	10.1145	3.03443	19.8481	52.3625	13.5926
TCGA-CV-5434	9.07945	1	2.11437	106.989	11.9267	23.3441	27.6694	5.09474	11.1805	55.848	8.62951	11.8871	1.52743	210.726	5.35119	1.8211	11.839	0.363049	42.3396	32.4484	11.1779	17.1836	0.0432966	3.86962	11.86	23.6403	5.14684	7.81118	5.30769	15.9936	17.6686	2.78765	2.43303	8.07693	31.7432	4.07471	7.92456	3.33291	5.76213	6.19077	405.797	9.18078	12.9766	7.48329	9.26358	5.61957	5.67676	13.0202	12.6859
TCGA-CV-A6JO	0.539726	1	1.94579	80.4773	8.84558	11.4694	13.7101	4.40391	6.76909	282.587	6.84922	16.6842	0.559247	123.466	4.79506	1.76374	26.8258	2.06815	84.4234	27.7443	5.57366	18.7426	0.0183684	4.78712	63.9377	12.2003	6.55058	3.85935	3.97196	8.82528	8.60895	1.59487	0.47855	6.64554	27.4118	4.71937	6.79851	3.08893	2.97468	19.6812	667.33	3.73827	9.84579	1.31511	7.67648	8.4543	0.167101	29.1268	17.8663
TCGA-4P-AA8J	0.279452	0	1.09402	51.5067	6.59185	13.2013	23.0649	7.99169	29.5178	75.4564	9.95045	11.5068	2.11106	93.3536	7.05325	1.99572	18.6815	0.894888	33.3753	63.9866	8.04011	3.68557	0.0467503	5.06658	63.9539	8.07254	10.8737	3.40358	4.25289	3.08673	18.6565	1.49928	1.05351	9.29218	33.9631	3.94014	10.5681	8.99616	1.58442	13.4977	498.373	4.70371	8.28766	2.65116	4.80877	12.9704	3.31022	13.5543	16.0455
TCGA-CV-7440	1.84932	1	2.93236	57.0215	9.35978	17.4347	21.0811	5.3479	13.6902	180.581	9.60595	17.2803	0.459453	149.594	5.19219	2.91334	36.2628	1.21872	41.2844	20.5751	5.46385	37.7914	0.0209446	4.18969	35.1856	13.897	7.33287	13.3315	4.8363	29.0077	11.5456	1.45631	0.361455	8.27043	19.4157	7.3119	9.13715	1.50018	3.893	15.9169	573.346	4.43038	8.80101	2.44939	7.7166	20.7431	0.876469	88.3667	25.2437
TCGA-CN-4738	1.19452	1	1.43947	31.1812	10.4427	46.8748	17.8491	5.65739	15.3704	190.774	7.36905	8.48498	7.40484	102.181	4.9885	2.36315	9.40907	3.03676	46.5709	14.7075	11.3131	12.6277	0.215083	5.22021	40.9745	19.4534	3.99114	4.43028	5.15072	11.2462	8.79315	2.91893	0.975932	6.55999	16.5826	9.86561	4.61957	4.20575	9.56731	20.1952	661.869	7.56437	11.1708	2.30367	7.67988	10.5316	3.20344	287.711	14.4331
TCGA-CN-A63W	1.03288	1	2.91027	71.5802	6.74942	19.2695	33.2667	9.58992	11.5597	214.787	13.3432	10.4641	0.859756	230.139	5.63451	0.742132	15.6357	6.18389	22.8507	27.3919	8.35093	37.637	0.0215497	2.88521	34.2692	12.0811	8.3343	7.95939	2.92326	8.62751	10.7775	1.5346	2.51108	6.25345	11.2896	2.20661	6.66957	6.80743	1.9047	52.693	872	10.4969	5.11569	3.54936	5.42558	6.1218	5.69992	23.8374	24.2518
TCGA-T3-A92M	1.14247	0	3.01323	38.2284	10.0862	15.5996	21.6849	13.9712	16.6729	31.8349	13.4979	12.0071	1.42395	172.421	11.2213	1.54062	4.98528	0.673777	43.0341	43.924	16.5139	4.32973	0.0660714	5.89115	77.4911	11.7251	8.82248	4.00907	7.97215	15.8018	20.5384	2.30396	0.569176	9.13002	20.199	7.03255	7.84991	6.77972	2.92372	7.8969	652.058	13.3906	11.5031	2.66088	7.78002	1.30373	5.36149	20.055	16.7086
TCGA-CX-7085	0.879452	0	1.01367	19.1999	5.72491	39.7684	19.0937	3.58511	15.5969	71.3541	4.25074	6.08691	2.36456	107.651	4.36755	2.97187	12.1486	3.25168	67.9187	32.413	6.91924	30.9247	0.0112255	2.98612	42.1072	10.2188	3.3726	2.9499	2.3958	14.5692	14.0308	1.49738	1.41532	3.3562	15.8583	4.16627	3.36029	2.72673	3.92332	11.3538	399.742	7.07727	6.58515	2.82262	8.07809	7.67292	1.40926	16.5297	13.2604
TCGA-CR-6470	4.16712	0	4.9828	64.5956	10.466	17.2383	54.8956	7.37808	14.725	47.1724	8.4379	11.7492	0.940265	133.643	12.2973	2.10658	3.55992	5.6038	97.1429	24.9681	7.91808	11.7783	0.0761229	4.14406	50.3304	18.2821	8.98705	5.56443	5.48545	24.2935	20.1903	1.94859	1.50758	10.0818	16.0705	13.3226	5.10372	4.7031	10.9027	8.20568	352.612	5.39228	10.971	3.16114	11.9233	14.5701	0.737022	29.6477	27.261
TCGA-CR-6492	1.31233	0	2.71025	32.6908	8.22574	17.2615	20.5561	7.03499	6.80162	61.8406	6.45704	10.7995	4.07091	98.7463	5.6932	0.884818	19.7986	3.95061	56.3263	31.5172	7.19684	29.4947	0.0552208	4.56615	63.2525	16.4339	6.81909	4.05776	3.79533	13.0797	12.1891	2.03193	1.22076	5.43394	21.201	6.40464	4.68778	4.12721	5.68093	17.234	592.003	5.80562	8.7599	0.81733	6.98052	10.8541	2.80062	20.5743	15.4071
TCGA-CV-7261	4.14247	0	3.16428	64.2415	12.1194	23.7005	12.7286	5.98733	8.27864	58.8252	7.87429	8.12058	2.21057	122.444	8.08656	5.2262	9.92381	1.25434	56.8979	23.9552	8.84088	8.202	0.103226	2.78952	18.4929	14.8959	5.52469	3.83705	4.12131	16.7655	17.0885	0.896278	0.812689	9.14061	22.4262	5.60536	6.50738	2.52885	2.85838	8.08632	380.276	13.2429	4.08645	9.21335	7.27798	6.3453	2.89232	26.2693	6.91544
TCGA-CR-6482	0.945205	0	7.3559	54.4728	8.70783	15.9426	22.8605	7.85518	6.08413	29.2353	8.81963	9.36409	1.80678	70.7584	9.13421	5.83521	3.58458	5.87869	74.3801	43.3076	8.5431	7.03542	0.148777	4.39351	79.3561	22.2283	9.14344	8.52344	6.26329	18.6719	36.2446	2.0488	1.65354	9.02641	16.7172	12.4313	4.28989	6.20759	4.98491	7.2551	702.386	12.6889	9.98447	1.8123	13.3247	10.3683	3.15304	17.0753	16.8164
TCGA-CQ-6224	4.71507	0	1.62374	47.0165	6.04185	13.8904	16.9334	6.19319	10.9135	67.8713	8.46884	6.16314	1.52175	121.794	6.33419	2.4506	23.2857	2.33619	53.0907	74.3379	4.7698	4.25382	0.0321474	3.99866	90.8791	8.65697	5.66679	2.9963	3.10751	11.3416	10.9785	1.49411	0.664829	5.0211	33.4925	6.44769	4.11221	4.93054	4.96546	10.1305	675.11	5.93076	12.0464	3.52506	6.98739	7.63482	3.2133	15.9642	17.6632
TCGA-CV-7568	2.53973	1	5.39745	17.4496	6.66176	16.8838	12.7569	8.62303	5.81864	195.208	6.6868	9.14054	1.10468	114.472	4.6703	3.1519	17.3678	9.87798	48.8668	36.8698	18.9152	33.1194	0.0596894	3.0048	29.5697	9.93961	6.73264	5.61472	16.5442	12.3316	7.25719	4.15113	3.58009	4.1124	25.1151	9.61824	3.64279	2.05091	2.57235	12.5522	426.365	15.0036	8.00758	5.35219	8.23135	21.5629	1.34665	32.281	13.5971
TCGA-CN-6988	0.871233	0	3.79258	43.3527	10.5697	8.66151	25.0453	10.2195	19.2042	82.769	13.0907	11.7924	3.73878	77.0408	5.44184	0.221892	0.292061	2.33136	30.7891	18.4207	9.6928	8.25356	0.0227408	3.83444	33.734	17.5079	4.10306	11.0348	4.26299	13.9059	9.03722	2.37323	0.604571	8.3112	9.41789	4.1899	5.69387	6.47636	8.74666	13.6316	364.274	11.0637	11.853	0.958104	7.9328	15.3419	0.306178	26.6123	15.4001
TCGA-H7-7774	1.11507	0	1.13149	34.2802	8.53988	10.2259	20.4648	4.98755	1.75344	44.4341	3.27473	9.15808	3.23674	91.4296	2.72688	0.237278	1.27803	5.65127	53.3993	7.24761	2.62727	33.5267	0.0306627	2.20717	18.8298	11.3396	5.05735	2.28238	1.50357	7.56645	6.28055	1.10788	0.674735	3.10354	12.2182	4.3518	3.3391	3.19889	3.30484	2.33469	429.23	14.9426	7.05177	5.67455	6.08323	6.24091	2.40291	14.6156	12.2025
TCGA-D6-6516	2.11781	0	1.34186	34.0656	8.86008	17.8508	24.7091	9.87522	4.43069	58.8323	7.74458	5.29421	0.808247	239.417	2.20792	0.498059	4.9858	3.59436	48.6487	10.9082	8.87074	24.4839	0.0287254	6.12519	15.238	16.4534	4.24889	3.66665	3.95246	12.7262	9.21318	2.06772	3.94948	7.69823	21.8663	5.43217	6.3991	0.965379	0.923752	12.0762	486.542	4.12645	7.73307	1.81438	5.21434	15.1347	3.96771	26.5126	6.09989
TCGA-HD-A6HZ	0.30411	0	5.23857	34.5801	11.7205	31.0983	8.9714	5.95953	6.35697	121.45	9.68492	9.69853	1.00567	208.036	6.06099	1.15543	5.8811	4.62068	35.1105	23.9424	15.903	15.1251	0.0160643	3.83806	32.9377	14.9619	5.08798	6.37708	7.12824	9.10343	20.6837	2.85825	1.80545	7.42636	12.9033	6.11122	6.25325	2.51386	2.70517	12.3167	442.66	8.76545	7.9445	3.2721	7.32849	8.55705	4.86646	29.4392	28.3217
TCGA-CV-A6JE	2.94521	0	0.828771	136.215	11.922	4.33445	12.2788	10.1348	12.4518	36.6022	8.5711	10.5339	0.407219	62.7813	5.65089	0.785923	4.23251	0.675605	46.8626	105.364	5.67578	19.2501	0.0406968	4.03822	58.8746	6.17589	5.58887	3.28229	0.4471	4.76907	22.3209	1.43623	0.170262	7.14603	19.7256	1.60933	19.7924	8.57059	1.27346	4.69377	920.532	5.65052	4.27754	1.69501	3.781	4.41886	0.802158	5.83338	10.5572
TCGA-P3-A5Q6	1.31507	1	1.89589	127.725	5.89518	7.16114	21.805	9.45814	7.49296	111.31	7.52993	7.70584	0.764348	178.481	6.38868	4.70896	9.78376	0.175446	30.6446	62.646	5.76768	1.46653	0.058186	3.82451	47.5481	12.2238	6.24406	4.16997	4.33122	3.83161	18.1702	1.95565	0.338591	9.71668	34.7273	3.64036	10.005	7.09856	1.07227	13.5249	867.588	8.16404	9.92637	3.98664	3.76338	13.8655	9.44322	168.916	11.6897
TCGA-CV-7425	4.70685	1	2.18489	28.5295	11.0791	5.77252	25.6686	5.72943	2.59892	36.7902	5.90413	7.94546	0.83292	247.894	6.13116	0.430387	2.68277	8.71426	24.8203	10.3737	8.39396	10.2752	0.00542874	2.85766	17.4703	14.312	4.703	3.91844	4.58652	13.2171	8.67863	1.26355	1.23265	3.75538	15.2036	5.5804	4.47207	1.34826	2.56535	15.2658	353.113	8.21357	8.04693	0.487715	6.19473	11.224	1.01242	19.2015	10.7511
TCGA-CV-A6JU	0.30137	0	1.05046	102.263	5.27898	5.37477	24.7048	15.3905	30.7592	34.3091	11.5657	11.1147	1.73372	46.2801	7.90817	0.837322	0.715589	2.28717	33.301	40.3381	3.4577	2.49336	0.0128957	5.92157	48.782	4.18626	6.67785	4.63262	0.533869	5.12564	33.4379	0.931876	0.772488	19.861	21.1288	5.07676	25.2862	7.90641	1.57189	13.0166	653.354	5.42463	7.15948	2.00082	3.07143	9.16881	2.7393	5.01487	41.1513
TCGA-CQ-A4CG	1.17808	1	4.31525	71.4187	9.5955	51.5018	18.9424	7.01805	21.7213	155.833	9.34144	8.30028	1.82585	189.507	9.20534	8.57791	16.8422	5.18698	50.6105	49.9799	9.94405	36.7656	0.0761698	4.21553	76.1333	17.0752	7.53959	10.6906	5.22204	17.5826	6.45108	1.72578	0.825644	6.31528	25.9546	9.78269	4.70286	5.0491	7.09696	14.5115	799.807	6.84166	14.272	15.8435	6.77109	10.9025	9.08234	23.7357	23.7339
TCGA-CN-A49C	1.76712	0	4.10686	95.5716	9.10813	22.0581	33.6127	10.1337	18.1169	98.963	13.9109	15.0814	5.98491	129.661	11.9455	6.68684	8.52336	12.2458	32.1854	39.5	7.08567	2.24251	0.039604	5.13287	53.809	24.009	15.2523	4.78624	5.47582	9.82577	29.2237	1.64725	0.933891	8.28084	15.6249	5.32393	10.1857	9.39906	3.90846	13.0165	806.043	11.7456	10.0983	1.14851	7.04164	10.1325	0.204161	12.3847	24.2393
TCGA-D6-6823	1.92055	0	3.97794	42.0673	7.909	17.129	22.31	11.223	11.8354	45.2862	12.6309	8.67474	1.47071	125.394	6.3808	0.868851	17.5385	0.543673	23.7698	46.2902	8.79208	23.8785	0.0186596	10.1217	86.3239	22.2	3.03247	5.20485	4.13693	13.4527	9.57166	2.0461	2.49527	6.61337	16.7191	4.33332	11.4138	6.1654	2.10846	23.8243	737.86	5.11578	16.0857	1.22163	8.45538	7.89181	0.56357	49.8723	13.7334
TCGA-BA-5557	1.70685	0	1.27531	88.6751	5.55843	89.7228	20.4472	5.64315	25.3936	137.836	4.11373	4.21435	1.45923	203.776	2.20946	1.19729	17.7246	4.29512	72.2092	33.9952	3.12988	8.6367	0.00851421	3.28648	31.3912	11.7877	2.14208	2.05236	2.36127	11.0794	12.7845	1.09101	1.54221	2.81654	17.0475	5.41996	3.42294	1.69694	4.18078	8.5628	599.678	11.496	5.52624	4.60486	5.9947	5.52929	2.91232	20.2027	9.63941
TCGA-CR-7372	2.07945	0	1.97581	36.3385	8.6572	12.4756	17.7797	6.72897	3.70171	21.9401	5.89118	5.96886	2.33881	94.2644	6.8558	3.23865	4.0876	1.47551	121.731	29.362	5.00808	19.0127	0.0328693	6.87001	20.2671	8.21279	3.61292	4.61234	3.47014	13.6768	10.7377	2.85624	1.21263	6.27625	17.3578	4.66185	6.50865	5.25025	4.81668	15.1413	332.604	5.37638	9.77877	1.66316	6.70074	5.31203	12.0654	22.4591	12.4129
TCGA-CV-A45W	3.83014	1	2.72235	117.869	8.51677	11.7508	32.0887	8.71837	19.8703	172.294	17.2369	12.8568	2.31652	165.947	8.93283	3.64461	4.62153	2.82101	49.8987	27.4782	18.157	32.9998	0.0456003	6.77754	14.5272	14.6486	7.82659	7.08389	4.37677	14.4662	26.9259	1.90814	1.04581	13.1677	28.4304	4.34591	11.8725	5.23297	9.2832	7.03007	494.815	8.90042	6.15297	11.193	8.33881	8.45927	6.09807	9.15481	15.2675
TCGA-CN-5370	0.709589	1	3.84915	19.0983	13.8249	30.676	17.7707	5.82854	12.9998	89.3184	7.07406	11.2636	2.3112	129.552	6.55094	3.03042	18.2145	7.33949	111.552	47.7482	6.42409	15.0782	0.0200181	5.24335	70.7389	15.7677	5.09175	5.77353	4.01651	16.3164	16.8339	1.39105	2.27265	7.91967	23.6419	7.98946	4.59874	7.95456	9.97298	12.1519	650.572	9.04896	8.99165	4.18596	10.0371	9.84838	1.56977	24.2129	30.1448
TCGA-CN-4737	1.71233	0	1.71729	32.9566	6.45439	14.2632	15.6937	8.97957	8.56354	24.1027	8.05234	7.807	1.61381	144.085	5.98439	2.8621	15.4078	2.54795	37.502	32.434	17.6622	22.1317	0.0178355	5.64818	56.6291	11.1516	2.4687	3.62534	2.43256	12.9053	7.64295	2.79498	1.34312	6.49257	19.146	5.11044	7.13241	5.54966	10.0183	10.0701	543.376	7.39437	9.06344	3.44409	8.31115	5.29394	3.23424	35.9027	9.38226
TCGA-CQ-6228	1.24932	1	2.07685	89.2319	4.63181	46.8595	35.9988	10.7939	17.9965	606.187	8.14432	10.019	0.51794	277.047	7.10335	0.941762	3.57111	2.66827	26.5493	39.7688	8.93729	2.69525	0.0185204	2.05603	24.5699	10.8948	7.40398	7.96008	3.49864	15.0286	10.0661	5.49726	0.562634	8.19727	6.74127	7.34016	4.72742	3.07123	1.36145	7.40969	1139.89	20.4847	25.327	19.2922	8.62655	21.4371	1.64271	17.3533	5.05752
TCGA-DQ-5625	3.10411	1	2.47271	44.3723	6.17159	15.2898	16.9688	5.08272	4.3887	26.0104	5.55646	12.4356	0.65768	97.5692	4.01541	0.89657	2.67694	2.14943	91.1514	32.5927	2.68006	21.6256	0.0246478	2.96956	53.0981	11.6188	7.43332	3.64444	5.00091	14.8522	8.24788	1.60093	0.734016	4.244	20.7232	5.74029	6.53741	4.69372	1.25586	11.7746	717.121	6.09056	6.5763	0.888283	8.2749	10.2597	1.34535	14.425	24.9363
TCGA-CR-7398	0.427397	0	6.46724	18.1613	5.01421	10.7533	30.5013	9.87786	14.0382	49.7245	10.9245	8.94628	2.22458	76.5246	11.3794	2.97086	4.18368	0.255774	38.256	35.624	12.0929	7.8237	0.0228774	8.36377	65.6203	33.4757	9.30413	8.00431	4.98376	32.2607	7.21211	1.85742	0.22514	20.4622	14.3907	7.4105	12.6612	3.70915	1.75112	10.6678	505.065	9.97696	12.8912	2.18522	7.21786	5.65059	0.92093	12.4889	9.48603
TCGA-CR-6474	1.54521	1	3.09463	58.9773	3.28314	44.2946	24.3523	6.80387	10.076	65.4958	4.2657	5.45357	1.70623	110.306	2.94381	7.37965	21.1788	1.53557	62.3516	53.2104	3.754	18.3499	0.0424315	3.24938	67.6145	7.96708	3.36057	3.22559	2.39384	12.721	8.3251	2.69346	0.790037	2.57794	23.1442	5.11305	4.69486	4.29452	4.80662	13.81	559.699	3.66384	10.8187	5.48701	7.88933	6.00971	2.80031	96.0361	23.6309
TCGA-KU-A6H8	0.89589	1	1.37682	31.4937	4.46612	18.0738	15.067	4.42422	1.78659	14.4759	6.80175	7.88041	3.85379	79.5494	6.13555	1.19976	4.89814	8.45029	9.46793	11.0318	10.5516	1.17514	0.019712	2.57558	6.5453	7.47711	4.0124	3.53469	2.23953	7.66767	6.78057	1.77502	0.532297	5.57984	8.77563	2.9351	5.13069	5.61687	3.03664	4.01398	281.179	9.72016	6.10347	0.444425	7.37973	7.8995	0.627633	7.84201	69.5816
TCGA-CQ-7068	3.5863	0	2.93744	40.1638	7.9974	10.6104	22.9898	5.90923	5.38242	136.383	9.26187	12.0892	0.646903	88.8376	6.09131	2.69709	11.3883	7.0257	109.829	30.8984	8.59149	9.03972	0.0091354	3.97307	45.0654	20.8884	9.56538	4.32973	8.99958	11.6169	10.8536	3.61545	1.12834	5.20249	18.0919	6.88704	5.36327	3.60594	5.59934	12.2919	694.659	6.35558	9.7579	0.757042	6.42542	14.3957	0.344892	34.1752	20.5087
TCGA-MZ-A6I9	1.33973	1	3.38544	59.8389	8.49735	5.62942	36.6474	11.2405	8.79122	16.7693	23.0311	19.7841	8.23903	75.3761	11.9758	0.525088	4.86642	2.49694	42.2582	20.3012	7.71142	1.5782	0.0128398	6.86274	28.7054	14.5909	9.83745	4.92263	4.62917	9.23331	30.8505	1.59404	0.234404	28.2807	13.2117	4.38249	13.214	7.48728	7.61028	5.19584	719.122	11.543	8.54145	1.47174	5.54264	18.2434	1.40168	4.44461	10.4096
TCGA-CV-6950	1.25753	1	4.33373	55.4101	9.22661	29.5373	26.9661	6.14436	11.9972	59.0116	15.072	5.56808	1.94059	122.799	5.31135	9.46739	8.16079	1.92548	49.6349	64.6209	5.71451	0.842009	0.0247408	3.17627	33.7326	18.8082	7.52238	7.92328	2.85822	14.1798	11.1296	3.34699	2.25633	4.83071	31.2641	5.14402	5.82722	4.91726	4.5736	16.141	763.779	3.67745	11.8655	4.63701	7.02275	6.4369	1.35043	36.4226	18.7894
TCGA-CV-6937	1.70959	1	1.31122	75.2585	5.07258	11.6798	16.1223	8.27151	17.5953	301.476	6.56531	14.9962	1.48378	61.9603	7.79847	0.827476	1.44329	0.669849	23.0446	75.8545	6.49246	12.9417	0.123572	5.9946	92.07	4.91423	6.53314	2.3402	8.56929	9.08618	12.308	1.40867	0.385389	8.30674	22.4021	4.35699	11.0494	8.06209	1.36586	3.379	870.211	11.9945	10.7237	6.70778	5.34431	26.6727	3.7472	18.2907	20.9097
TCGA-D6-8568	2.07945	0	5.28033	48.1578	7.66244	33.6565	20.2239	6.49764	12.3392	54.313	9.67976	8.83472	3.17817	90.691	7.35037	3.01966	25.5551	1.76214	46.9178	65.3714	7.9431	4.22179	0.026582	7.21456	82.9354	18.7226	4.89136	4.75322	8.67551	16.2353	13.0203	2.483	1.01606	6.84182	24.8083	6.81793	6.66182	3.73204	7.73436	21.0751	551.119	4.08326	6.04165	6.53757	6.31608	5.40339	1.29777	31.5133	12.2971
TCGA-T2-A6WX	0.572603	1	2.3452	80.723	6.81486	12.8448	31.2016	8.29171	48.5653	45.2499	10.0174	8.61676	1.50994	136.842	7.14431	1.16877	23.33	3.73904	61.4846	49.8662	9.09717	5.95841	0	4.40706	63.15	14.5716	9.36001	2.81605	5.65163	6.13278	14.7327	3.0748	0.884369	13.4304	17.5166	5.19599	5.76976	4.95029	4.58057	9.0688	936.893	5.86484	9.8036	1.99386	4.70615	11.9392	12.9477	12.1898	18.5928
TCGA-CV-A6K1	1.87671	0	1.3817	81.9294	6.80058	2.59395	30.6834	12.8114	16.0219	32.7393	11.4898	13.5891	0.211048	80.4063	8.79546	0.224617	1.72675	0.224613	19.2484	38.8747	4.57856	12.0258	0.00613867	7.63345	49.001	7.97828	8.39687	4.58467	0.735262	6.36474	19.2184	1.41589	0.087553	16.9139	12.8176	2.05863	11.2534	4.28696	0.631231	8.4426	829.57	5.57767	8.8566	1.41043	2.15212	6.93048	0.999619	13.5349	14.8781
TCGA-CV-A45R	15.0137	0	1.45735	32.0521	6.03409	14.615	18.1362	7.3976	3.28518	41.2788	8.70051	12.1752	2.41832	72.9481	5.23557	3.45409	2.63246	20.7234	51.1944	41.2126	7.1561	8.46721	0.0307625	3.59801	51.4782	9.51416	5.90107	4.13066	1.67661	8.48391	11.8642	0.909867	1.87434	4.97741	24.5681	3.19685	6.24613	10.2554	1.84109	15.5078	478.4	6.55785	4.74779	1.18489	8.15884	4.88423	1.64553	10.7148	16.2633
TCGA-CR-6481	0.852055	0	3.12384	63.248	8.46279	26.8691	31.1008	7.61205	13.7036	46.3679	6.49904	9.98778	0.949146	169.648	4.75444	1.41929	3.76109	10.2241	61.1822	41.9696	6.64539	8.20874	0.0183593	8.30761	47.3827	17.6123	5.83727	4.8204	4.78907	18.9318	26.0213	2.37376	3.74707	10.2247	17.955	10.4004	6.27856	3.98431	4.70108	11.5016	737.677	10.8372	11.3885	1.12566	9.70373	1.70627	1.28186	22.6791	17.0928
TCGA-CV-7422	2.8411	1	5.18133	70.3628	9.4699	23.582	21.7394	6.73848	6.87428	77.9933	8.63814	13.5129	0.962044	126.715	9.40042	0.922995	15.5869	2.4247	44.8598	31.7405	5.72847	0.912603	0.0043907	3.37417	28.0659	29.106	7.32861	6.33837	5.11074	33.8043	12.5419	1.76535	0.786539	11.2299	16.4261	6.57653	4.43714	5.52064	6.67849	7.61615	896.944	18.738	11.1508	3.96498	6.61137	0.570884	2.08503	25.7993	19.6461
TCGA-HL-7533	2.89589	0	3.31839	73.6523	13.3604	41.3684	27.8777	11.598	36.374	145.671	12.6388	15.1243	0.237445	241.324	10.8144	0.871478	11.5381	8.43675	135.777	26.0176	5.82718	1.81627	0.0243543	3.7663	80.6115	13.8858	18.0448	5.28981	5.16356	14.6223	25.8948	1.39922	0.628711	9.68822	7.40792	5.91567	6.01169	3.75425	1.36823	8.60251	987.227	11.1228	8.41239	6.84057	8.63284	0.222998	0.310178	24.1661	32.5373
TCGA-CR-6480	0.991781	0	6.71502	28.3122	10.3635	22.9741	26.2343	7.67572	21.6784	41.2688	8.98258	14.8844	30.5051	89.925	11.398	2.09504	0.654681	4.11523	54.2562	19.1389	7.58305	1.32041	0.0362743	4.61684	92.8663	19.895	10.0755	4.33482	9.50183	31.1877	21.1275	2.22067	0.331112	9.31333	14.1501	11.3268	5.25489	9.2308	19.6889	7.23379	484.34	9.54148	13.2583	0.618059	13.6734	15.409	1.57454	18.31	13.0125
TCGA-CQ-5331	3.83288	0	2.92919	66.7588	10.9662	14.4103	23.9254	6.18969	4.67269	63.4287	5.02487	13.4454	0.866269	98.9261	4.23053	1.31669	6.5847	1.74866	40.9659	19.4818	4.65174	21.2747	0.0138376	4.63529	42.7433	15.3627	4.91225	4.21697	4.11848	18.2698	6.68741	2.25858	1.88478	6.73883	9.68048	7.23129	4.11411	2.99224	2.09238	11.8492	628.209	6.40053	9.91064	0.971665	7.20295	7.84765	1.40045	18.7816	17.0124
TCGA-DQ-5630	2.82192	0	1.85276	26.2545	7.4819	13.4615	17.9878	6.10239	9.61543	56.244	7.89224	14.4747	0.863828	126.664	6.22676	2.63039	10.031	3.24785	34.5913	37.2593	7.04965	24.5793	0.0508417	3.54214	19.6149	6.65068	12.5935	3.48913	3.86446	7.8668	13.3381	2.23332	0.921723	6.50985	26.7192	4.19699	7.28843	7.93849	2.26481	15.9683	544.145	5.93979	11.728	1.31253	6.99477	11.0744	1.85007	11.064	18.3151
TCGA-CR-7382	2.18082	0	4.148	21.8541	9.37741	22.9499	15.4847	5.40047	13.0506	24.991	6.66959	8.27886	3.64039	66.418	6.23149	9.69262	42.1481	3.05233	80.4938	51.2434	7.64281	8.07869	0.0222674	5.1963	78.8158	14.1153	8.25287	3.60303	7.10626	17.5516	12.3718	2.00763	1.92332	8.60815	29.8202	10.118	5.62702	2.61429	8.51829	11.5029	451.294	2.7313	10.3661	7.4386	8.38831	8.03732	3.13984	39.76	13.4948
TCGA-D6-A6EQ	1.00822	0	0.928115	74.006	5.21517	6.33465	21.5296	8.10822	22.6233	53.9113	12.2934	8.3494	0.833627	92.8377	11.7893	0.717483	8.2478	1.093	74.3309	51.4406	3.36804	10.5726	0.0229892	5.10158	33.5089	7.83675	5.72769	2.30176	1.48457	1.56815	15.4999	1.31355	0.367231	10.7945	13.3367	1.63536	14.5014	5.70353	4.2498	13.3943	910.676	3.61558	4.70187	2.20778	3.53494	7.44114	4.79621	66.3701	15.0515
TCGA-CQ-5333	0.934247	1	1.47563	83.5784	5.26625	7.04462	29.6305	5.67015	22.0302	51.6636	9.2867	7.72518	1.66374	110.356	6.77535	0.973154	0.77332	3.61833	53.5283	50.8532	5.09099	4.69156	0.0244394	3.86402	93.5563	7.90156	13.7699	3.68642	2.73733	4.73191	21.7077	1.30742	1.30597	8.40533	20.0748	2.88853	12.8641	11.5368	3.28958	11.6856	844.78	5.2032	8.987	0.786554	5.22945	20.677	0.978251	11.5861	23.8911
TCGA-H7-8501	1.26301	0	6.79775	83.8489	9.28306	14.3255	13.7969	9.28341	15.4604	427.02	14.4728	12.4284	0.59008	199.119	11.1173	0.979344	72.8701	1.43645	83.5836	71.0908	10.2526	6.04949	0.0175565	6.11579	20.9327	7.6439	11.0926	7.15756	18.6221	10.6814	11.2642	2.5189	0.861375	15.2766	18.798	9.58197	9.26829	3.56063	5.13194	17.5963	875.2	6.9692	17.7749	2.48827	5.17039	10.6861	1.08606	7.68235	20.1279
[truncated: 168 more columns]
