# Supplementary material for: A Novel Prognostic Index Based on the Analysis of Glycolysis-Related Genes in Head and Neck Squamous Cell Carcinomas
Source: J Oncol. 2020 Sep 24;2020:7353874. doi: 10.1155/2020/7353874 (PMC7532401; doi:10.1155/2020/7353874)
Supplement: Supplementary Materials — Supplementary Table 1: clinical information for 528 samples.xlsx. Supplementary Table 2: expression of 298 glycolysis-related genes in 546 HNSCC samples.xlsx. Supplementary Table 3: the expression of glycolysis-related genes and survival of patients in the training cohort.xlsx. Supplementary Table 4: the expression of glycolysis-related genes and survival of patients in the text cohort.xlsx. Supplementary Table 5: univariate Cox regression analysis of the training dataset (24 mRNAs were identified, P0.05).xlsx. [file 7353874.f1.zip › 7353874.f1/Supplementary Tables 5. Univariate Cox regression analysis of the training dataset (24 mRNAs were identified, P0.05)..xlsx]

## Sheet: Sheet1
Supplementary Tables 5. Univariate Cox regression analysis of the training dataset (24 mRNAs were identified, P<0.05).
id	HR	HR.95L	HR.95H	pvalue
PGK1	1.00541	1.0027	1.00812	8.7259e-05
STC2	1.03963	1.01842	1.06128	0.000219341
NUP37	1.06936	1.02816	1.1122	0.000821816
CTH	1.34218	1.11427	1.61671	0.00193865
HMMR	1.07069	1.01724	1.12693	0.00893688
NUP93	1.0833	1.01856	1.15216	0.010937
GPR87	1.00993	1.00211	1.0178	0.012697
ADORA2B	1.03103	1.00425	1.05854	0.0228836
EXT2	1.01305	1.00171	1.02453	0.0240094
AURKA	1.03105	1.00394	1.05889	0.0244955
TPST1	1.03528	1.00446	1.06703	0.0245177
TGFBI	1.00133	1.00017	1.0025	0.0245692
PRPS1	1.02365	1.00299	1.04475	0.0246768
ME1	1.01193	1.00147	1.0225	0.0253073
STC1	1.02923	1.00252	1.05666	0.0317422
CXCR4	0.98722	0.9757	0.998877	0.031747
HK1	1.01106	1.00096	1.02126	0.0318413
TXN	1.00084	1.00007	1.00161	0.0321106
JMJD8	0.954279	0.914237	0.996073	0.032366
P4HA1	1.01249	1.00093	1.02418	0.0340851
PPIA	1.00367	1.00018	1.00718	0.0394162
G6PD	1.00319	1.00012	1.00628	0.0418434
PLOD2	1.01897	1.00056	1.03773	0.043355
KIF2A	0.936756	0.878072	0.999362	0.0477831
